# Supplementary material for: Misic, a general deep learning-based method for the high-throughput cell segmentation of complex bacterial communities
Source: eLife. 2021 Sep 9;10:e65151. doi: 10.7554/eLife.65151 (PMC8478410; doi:10.7554/eLife.65151)
Supplement: Figure 2—figure supplement 1—source data 1. [file elife-65151-fig2-figsupp1-data1.csv]

1.000000000000000000e+00	9.599999999999999645e-01	9.499999999999999556e-01	9.399999999999999467e-01	9.300000000000000488e-01	9.300000000000000488e-01	9.300000000000000488e-01	9.300000000000000488e-01	9.300000000000000488e-01	9.300000000000000488e-01	9.300000000000000488e-01	9.300000000000000488e-01	9.300000000000000488e-01	9.300000000000000488e-01	9.300000000000000488e-01	9.300000000000000488e-01	9.300000000000000488e-01	9.300000000000000488e-01	9.300000000000000488e-01	9.300000000000000488e-01	9.300000000000000488e-01	9.100000000000000311e-01	9.000000000000000222e-01	9.000000000000000222e-01	9.000000000000000222e-01	9.000000000000000222e-01	9.000000000000000222e-01	9.000000000000000222e-01	8.900000000000000133e-01	8.800000000000000044e-01	8.800000000000000044e-01	8.699999999999999956e-01	8.599999999999999867e-01	8.599999999999999867e-01	8.499999999999999778e-01	8.499999999999999778e-01	8.499999999999999778e-01	8.399999999999999689e-01	8.199999999999999512e-01	8.199999999999999512e-01	8.199999999999999512e-01	8.199999999999999512e-01	8.199999999999999512e-01	8.000000000000000444e-01	7.900000000000000355e-01	7.900000000000000355e-01	7.900000000000000355e-01	7.700000000000000178e-01	7.600000000000000089e-01	7.600000000000000089e-01
1.000000000000000000e+00	1.000000000000000000e+00	1.000000000000000000e+00	1.000000000000000000e+00	9.870129870129870087e-01	9.870129870129870087e-01	9.870129870129870087e-01	9.740259740259740173e-01	9.740259740259740173e-01	9.740259740259740173e-01	9.740259740259740173e-01	9.740259740259740173e-01	9.740259740259740173e-01	9.740259740259740173e-01	9.740259740259740173e-01	9.740259740259740173e-01	9.740259740259740173e-01	9.740259740259740173e-01	9.740259740259740173e-01	9.740259740259740173e-01	9.740259740259740173e-01	9.610389610389610260e-01	9.350649350649350433e-01	9.350649350649350433e-01	9.350649350649350433e-01	9.350649350649350433e-01	9.220779220779220520e-01	9.220779220779220520e-01	9.090909090909090606e-01	9.090909090909090606e-01	9.090909090909090606e-01	9.090909090909090606e-01	8.961038961038960693e-01	8.961038961038960693e-01	8.831168831168830780e-01	8.831168831168830780e-01	8.701298701298700866e-01	8.571428571428570953e-01	8.571428571428570953e-01	8.571428571428570953e-01	8.441558441558441039e-01	8.441558441558441039e-01	8.311688311688312236e-01	8.311688311688312236e-01	8.311688311688312236e-01	8.311688311688312236e-01	8.181818181818182323e-01	8.051948051948052409e-01	8.051948051948052409e-01	8.051948051948052409e-01
9.062500000000000000e-01	8.529411764705882026e-01	8.529411764705882026e-01	8.529411764705882026e-01	8.529411764705882026e-01	8.529411764705882026e-01	8.529411764705882026e-01	8.529411764705882026e-01	8.529411764705882026e-01	8.529411764705882026e-01	8.529411764705882026e-01	8.235294117647058432e-01	8.235294117647058432e-01	8.235294117647058432e-01	8.235294117647058432e-01	8.235294117647058432e-01	8.235294117647058432e-01	8.235294117647058432e-01	8.235294117647058432e-01	8.235294117647058432e-01	8.235294117647058432e-01	8.235294117647058432e-01	8.235294117647058432e-01	8.235294117647058432e-01	8.235294117647058432e-01	8.235294117647058432e-01	8.235294117647058432e-01	8.235294117647058432e-01	8.235294117647058432e-01	8.235294117647058432e-01	8.235294117647058432e-01	8.235294117647058432e-01	8.235294117647058432e-01	8.235294117647058432e-01	8.235294117647058432e-01	8.235294117647058432e-01	8.235294117647058432e-01	8.235294117647058432e-01	8.235294117647058432e-01	8.235294117647058432e-01	8.235294117647058432e-01	8.235294117647058432e-01	8.235294117647058432e-01	8.235294117647058432e-01	8.235294117647058432e-01	8.235294117647058432e-01	8.235294117647058432e-01	8.235294117647058432e-01	8.235294117647058432e-01	7.941176470588234837e-01
[truncated: 50 more columns]
