# Supplementary material for: Misic, a general deep learning-based method for the high-throughput cell segmentation of complex bacterial communities
Source: eLife. 2021 Sep 9;10:e65151. doi: 10.7554/eLife.65151 (PMC8478410; doi:10.7554/eLife.65151)
Supplement: Figure 2—figure supplement 1—source data 2. [file elife-65151-fig2-figsupp1-data2.csv]

1.000000000000000000e+00	9.578947368421052433e-01	9.578947368421052433e-01	9.578947368421052433e-01	9.578947368421052433e-01	9.578947368421052433e-01	9.578947368421052433e-01	9.578947368421052433e-01	9.578947368421052433e-01	9.578947368421052433e-01	9.473684210526315264e-01	9.473684210526315264e-01	9.473684210526315264e-01	9.473684210526315264e-01	9.473684210526315264e-01	9.473684210526315264e-01	9.473684210526315264e-01	9.473684210526315264e-01	9.473684210526315264e-01	9.368421052631579204e-01	9.368421052631579204e-01	9.368421052631579204e-01	9.368421052631579204e-01	9.368421052631579204e-01	9.368421052631579204e-01	9.368421052631579204e-01	9.368421052631579204e-01	9.263157894736842035e-01	9.263157894736842035e-01	9.263157894736842035e-01	9.263157894736842035e-01	9.157894736842104866e-01	9.157894736842104866e-01	9.157894736842104866e-01	9.157894736842104866e-01	9.157894736842104866e-01	9.157894736842104866e-01	8.947368421052631637e-01	8.842105263157894468e-01	8.736842105263158409e-01	8.736842105263158409e-01	8.736842105263158409e-01	8.736842105263158409e-01	8.736842105263158409e-01	8.736842105263158409e-01	8.736842105263158409e-01	8.736842105263158409e-01	8.736842105263158409e-01	8.736842105263158409e-01	8.736842105263158409e-01
9.743589743589743390e-01	9.620253164556962222e-01	9.620253164556962222e-01	9.493670886075948889e-01	9.493670886075948889e-01	9.493670886075948889e-01	9.493670886075948889e-01	9.493670886075948889e-01	9.493670886075948889e-01	9.493670886075948889e-01	9.493670886075948889e-01	9.493670886075948889e-01	9.493670886075948889e-01	9.493670886075948889e-01	9.493670886075948889e-01	9.493670886075948889e-01	9.367088607594936667e-01	9.367088607594936667e-01	9.367088607594936667e-01	9.367088607594936667e-01	9.367088607594936667e-01	9.367088607594936667e-01	9.240506329113924444e-01	9.113924050632911111e-01	9.113924050632911111e-01	8.987341772151898889e-01	8.987341772151898889e-01	8.987341772151898889e-01	8.987341772151898889e-01	8.987341772151898889e-01	8.987341772151898889e-01	8.987341772151898889e-01	8.987341772151898889e-01	8.987341772151898889e-01	8.987341772151898889e-01	8.987341772151898889e-01	8.987341772151898889e-01	8.987341772151898889e-01	8.860759493670885556e-01	8.860759493670885556e-01	8.860759493670885556e-01	8.860759493670885556e-01	8.734177215189873333e-01	8.734177215189873333e-01	8.734177215189873333e-01	8.734177215189873333e-01	8.734177215189873333e-01	8.734177215189873333e-01	8.734177215189873333e-01	8.734177215189873333e-01
9.677419354838709964e-01	9.375000000000000000e-01	9.375000000000000000e-01	9.375000000000000000e-01	9.375000000000000000e-01	9.375000000000000000e-01	9.375000000000000000e-01	9.375000000000000000e-01	9.375000000000000000e-01	9.375000000000000000e-01	9.375000000000000000e-01	9.375000000000000000e-01	9.375000000000000000e-01	9.375000000000000000e-01	9.375000000000000000e-01	9.375000000000000000e-01	9.375000000000000000e-01	9.375000000000000000e-01	9.375000000000000000e-01	9.375000000000000000e-01	9.375000000000000000e-01	9.375000000000000000e-01	9.375000000000000000e-01	9.375000000000000000e-01	9.375000000000000000e-01	9.375000000000000000e-01	9.375000000000000000e-01	9.375000000000000000e-01	9.375000000000000000e-01	9.375000000000000000e-01	9.062500000000000000e-01	9.062500000000000000e-01	9.062500000000000000e-01	9.062500000000000000e-01	9.062500000000000000e-01	9.062500000000000000e-01	9.062500000000000000e-01	9.062500000000000000e-01	8.750000000000000000e-01	8.750000000000000000e-01	8.750000000000000000e-01	8.750000000000000000e-01	8.437500000000000000e-01	8.437500000000000000e-01	8.437500000000000000e-01	8.437500000000000000e-01	8.437500000000000000e-01	8.437500000000000000e-01	8.437500000000000000e-01	8.437500000000000000e-01
[truncated: 50 more columns]
