# Supplementary material for: Misic, a general deep learning-based method for the high-throughput cell segmentation of complex bacterial communities
Source: eLife. 2021 Sep 9;10:e65151. doi: 10.7554/eLife.65151 (PMC8478410; doi:10.7554/eLife.65151)
Supplement: Figure 2—figure supplement 1—source data 3. [file elife-65151-fig2-figsupp1-data3.csv]

9.775280898876403946e-01	9.775280898876403946e-01	9.775280898876403946e-01	9.775280898876403946e-01	9.662921348314607028e-01	9.662921348314607028e-01	9.662921348314607028e-01	9.662921348314607028e-01	9.550561797752809001e-01	9.438202247191010974e-01	9.438202247191010974e-01	9.438202247191010974e-01	9.438202247191010974e-01	9.438202247191010974e-01	9.438202247191010974e-01	9.438202247191010974e-01	9.438202247191010974e-01	9.438202247191010974e-01	9.438202247191010974e-01	9.438202247191010974e-01	9.325842696629212947e-01	9.325842696629212947e-01	9.325842696629212947e-01	9.325842696629212947e-01	9.325842696629212947e-01	9.325842696629212947e-01	9.325842696629212947e-01	9.325842696629212947e-01	9.213483146067416030e-01	9.213483146067416030e-01	9.213483146067416030e-01	9.101123595505618002e-01	9.101123595505618002e-01	9.101123595505618002e-01	9.101123595505618002e-01	8.988764044943819975e-01	8.876404494382021948e-01	8.764044943820225031e-01	8.764044943820225031e-01	8.764044943820225031e-01	8.764044943820225031e-01	8.651685393258427004e-01	8.651685393258427004e-01	8.651685393258427004e-01	8.539325842696628976e-01	8.539325842696628976e-01	8.539325842696628976e-01	8.426966292134830949e-01	8.314606741573034032e-01	8.202247191011236005e-01
9.285714285714286031e-01	9.285714285714286031e-01	9.285714285714286031e-01	9.285714285714286031e-01	9.000000000000000222e-01	9.000000000000000222e-01	9.000000000000000222e-01	9.000000000000000222e-01	8.857142857142856762e-01	8.857142857142856762e-01	8.857142857142856762e-01	8.857142857142856762e-01	8.857142857142856762e-01	8.857142857142856762e-01	8.857142857142856762e-01	8.857142857142856762e-01	8.857142857142856762e-01	8.857142857142856762e-01	8.857142857142856762e-01	8.714285714285714413e-01	8.428571428571428603e-01	8.428571428571428603e-01	8.285714285714286254e-01	8.285714285714286254e-01	8.285714285714286254e-01	8.285714285714286254e-01	8.285714285714286254e-01	8.285714285714286254e-01	8.000000000000000444e-01	8.000000000000000444e-01	7.857142857142856984e-01	7.857142857142856984e-01	7.857142857142856984e-01	7.857142857142856984e-01	7.857142857142856984e-01	7.714285714285714635e-01	7.714285714285714635e-01	7.714285714285714635e-01	7.714285714285714635e-01	7.571428571428571175e-01	7.571428571428571175e-01	7.571428571428571175e-01	7.571428571428571175e-01	7.571428571428571175e-01	7.571428571428571175e-01	7.428571428571428825e-01	7.428571428571428825e-01	7.428571428571428825e-01	7.285714285714285365e-01	7.142857142857143016e-01
9.393939393939394478e-01	9.117647058823529216e-01	9.117647058823529216e-01	9.117647058823529216e-01	9.117647058823529216e-01	9.117647058823529216e-01	9.117647058823529216e-01	9.117647058823529216e-01	9.117647058823529216e-01	9.117647058823529216e-01	9.117647058823529216e-01	9.117647058823529216e-01	9.117647058823529216e-01	9.117647058823529216e-01	9.117647058823529216e-01	9.117647058823529216e-01	9.117647058823529216e-01	9.117647058823529216e-01	9.117647058823529216e-01	9.117647058823529216e-01	9.117647058823529216e-01	9.117647058823529216e-01	9.117647058823529216e-01	9.117647058823529216e-01	9.117647058823529216e-01	9.117647058823529216e-01	9.117647058823529216e-01	9.117647058823529216e-01	9.117647058823529216e-01	9.117647058823529216e-01	9.117647058823529216e-01	9.117647058823529216e-01	9.117647058823529216e-01	9.117647058823529216e-01	9.117647058823529216e-01	9.117647058823529216e-01	9.117647058823529216e-01	9.117647058823529216e-01	9.117647058823529216e-01	9.117647058823529216e-01	8.823529411764705621e-01	8.823529411764705621e-01	8.823529411764705621e-01	8.823529411764705621e-01	8.823529411764705621e-01	8.823529411764705621e-01	8.823529411764705621e-01	8.823529411764705621e-01	8.823529411764705621e-01	8.823529411764705621e-01
[truncated: 50 more columns]
