# Supplementary material for: Misic, a general deep learning-based method for the high-throughput cell segmentation of complex bacterial communities
Source: eLife. 2021 Sep 9;10:e65151. doi: 10.7554/eLife.65151 (PMC8478410; doi:10.7554/eLife.65151)
Supplement: Figure 2—figure supplement 1—source data 4. [file elife-65151-fig2-figsupp1-data4.csv]

0.000000000000000000e+00
1.000000000000000021e-02
2.000000000000000042e-02
2.999999999999999889e-02
4.000000000000000083e-02
5.000000000000000278e-02
5.999999999999999778e-02
7.000000000000000666e-02
8.000000000000000167e-02
8.999999999999999667e-02
1.000000000000000056e-01
1.100000000000000006e-01
1.199999999999999956e-01
1.300000000000000044e-01
1.400000000000000133e-01
1.499999999999999944e-01
1.600000000000000033e-01
1.700000000000000122e-01
1.799999999999999933e-01
1.900000000000000022e-01
2.000000000000000111e-01
2.099999999999999922e-01
2.200000000000000011e-01
2.300000000000000100e-01
2.399999999999999911e-01
2.500000000000000000e-01
2.600000000000000089e-01
2.700000000000000178e-01
2.800000000000000266e-01
2.899999999999999800e-01
2.999999999999999889e-01
3.099999999999999978e-01
3.200000000000000067e-01
3.300000000000000155e-01
3.400000000000000244e-01
3.500000000000000333e-01
3.599999999999999867e-01
3.699999999999999956e-01
3.800000000000000044e-01
3.900000000000000133e-01
4.000000000000000222e-01
4.100000000000000311e-01
4.199999999999999845e-01
4.299999999999999933e-01
4.400000000000000022e-01
4.500000000000000111e-01
4.600000000000000200e-01
4.700000000000000289e-01
4.799999999999999822e-01
4.899999999999999911e-01
5.000000000000000000e-01
5.100000000000000089e-01
5.200000000000000178e-01
5.300000000000000266e-01
5.400000000000000355e-01
5.500000000000000444e-01
5.600000000000000533e-01
5.700000000000000622e-01
5.799999999999999600e-01
5.899999999999999689e-01
5.999999999999999778e-01
6.099999999999999867e-01
6.199999999999999956e-01
6.300000000000000044e-01
6.400000000000000133e-01
6.500000000000000222e-01
6.600000000000000311e-01
6.700000000000000400e-01
6.800000000000000488e-01
6.900000000000000577e-01
7.000000000000000666e-01
7.099999999999999645e-01
7.199999999999999734e-01
7.299999999999999822e-01
7.399999999999999911e-01
7.500000000000000000e-01
7.600000000000000089e-01
7.700000000000000178e-01
7.800000000000000266e-01
7.900000000000000355e-01
8.000000000000000444e-01
8.100000000000000533e-01
8.200000000000000622e-01
8.300000000000000711e-01
8.399999999999999689e-01
8.499999999999999778e-01
8.599999999999999867e-01
8.699999999999999956e-01
8.800000000000000044e-01
8.900000000000000133e-01
9.000000000000000222e-01
9.100000000000000311e-01
9.200000000000000400e-01
9.300000000000000488e-01
9.400000000000000577e-01
9.500000000000000666e-01
9.599999999999999645e-01
9.699999999999999734e-01
9.799999999999999822e-01
9.899999999999999911e-01
