# Supplementary material for: Misic, a general deep learning-based method for the high-throughput cell segmentation of complex bacterial communities
Source: eLife. 2021 Sep 9;10:e65151. doi: 10.7554/eLife.65151 (PMC8478410; doi:10.7554/eLife.65151)
Supplement: Figure 2—figure supplement 1—source data 5. [file elife-65151-fig2-figsupp1-data5.csv]

1.000000000000000000e+00
9.588235294117647411e-01
9.588235294117647411e-01
9.588235294117647411e-01
9.588235294117647411e-01
9.588235294117647411e-01
9.588235294117647411e-01
9.588235294117647411e-01
9.588235294117647411e-01
9.588235294117647411e-01
9.588235294117647411e-01
9.588235294117647411e-01
9.529411764705881804e-01
9.529411764705881804e-01
9.529411764705881804e-01
9.411764705882352811e-01
9.411764705882352811e-01
9.411764705882352811e-01
9.411764705882352811e-01
9.411764705882352811e-01
9.352941176470588314e-01
9.294117647058823817e-01
9.294117647058823817e-01
9.294117647058823817e-01
9.294117647058823817e-01
9.176470588235293713e-01
9.058823529411764719e-01
9.000000000000000222e-01
8.882352941176470118e-01
8.882352941176470118e-01
8.823529411764705621e-01
8.764705882352941124e-01
8.764705882352941124e-01
8.705882352941176627e-01
8.705882352941176627e-01
8.588235294117646523e-01
8.588235294117646523e-01
8.470588235294117530e-01
8.352941176470588536e-01
8.294117647058824039e-01
8.235294117647058432e-01
8.235294117647058432e-01
8.176470588235293935e-01
8.176470588235293935e-01
8.176470588235293935e-01
8.058823529411764941e-01
8.058823529411764941e-01
7.882352941176470340e-01
7.823529411764705843e-01
7.647058823529411242e-01
7.470588235294117752e-01
7.294117647058823151e-01
7.294117647058823151e-01
7.235294117647058654e-01
7.235294117647058654e-01
7.235294117647058654e-01
7.176470588235294157e-01
6.999999999999999556e-01
6.999999999999999556e-01
6.999999999999999556e-01
6.882352941176470562e-01
6.764705882352941568e-01
6.588235294117646967e-01
6.411764705882353477e-01
6.294117647058823373e-01
6.176470588235294379e-01
5.823529411764706287e-01
5.647058823529411686e-01
5.470588235294118196e-01
5.058823529411764497e-01
4.588235294117646856e-01
4.058823529411764719e-01
3.823529411764705621e-01
3.411764705882353033e-01
3.176470588235293935e-01
2.764705882352941346e-01
2.647058823529411797e-01
2.235294117647058931e-01
1.764705882352941291e-01
1.588235294117646967e-01
1.235294117647058876e-01
1.235294117647058876e-01
9.411764705882352811e-02
8.823529411764706454e-02
7.058823529411764608e-02
5.294117647058823456e-02
4.117647058823529355e-02
3.529411764705882304e-02
2.941176470588235253e-02
2.352941176470588203e-02
1.764705882352941152e-02
1.176470588235294101e-02
5.882352941176470507e-03
0.000000000000000000e+00
0.000000000000000000e+00
0.000000000000000000e+00
0.000000000000000000e+00
0.000000000000000000e+00
0.000000000000000000e+00
0.000000000000000000e+00
