# Supplementary material for: Misic, a general deep learning-based method for the high-throughput cell segmentation of complex bacterial communities
Source: eLife. 2021 Sep 9;10:e65151. doi: 10.7554/eLife.65151 (PMC8478410; doi:10.7554/eLife.65151)
Supplement: Figure 2—figure supplement 1—source data 6. [file elife-65151-fig2-figsupp1-data6.csv]

9.702380952380952328e-01
9.702380952380952328e-01
9.702380952380952328e-01
9.702380952380952328e-01
9.702380952380952328e-01
9.702380952380952328e-01
9.702380952380952328e-01
9.702380952380952328e-01
9.702380952380952328e-01
9.702380952380952328e-01
9.702380952380952328e-01
9.702380952380952328e-01
9.702380952380952328e-01
9.702380952380952328e-01
9.702380952380952328e-01
9.702380952380952328e-01
9.702380952380952328e-01
9.702380952380952328e-01
9.702380952380952328e-01
9.702380952380952328e-01
9.702380952380952328e-01
9.702380952380952328e-01
9.702380952380952328e-01
9.702380952380952328e-01
9.702380952380952328e-01
9.702380952380952328e-01
9.702380952380952328e-01
9.702380952380952328e-01
9.702380952380952328e-01
9.642857142857143016e-01
9.642857142857143016e-01
9.583333333333333703e-01
9.464285714285713969e-01
9.464285714285713969e-01
9.464285714285713969e-01
9.464285714285713969e-01
9.404761904761904656e-01
9.345238095238095344e-01
9.226190476190476719e-01
9.107142857142856984e-01
9.107142857142856984e-01
9.107142857142856984e-01
9.107142857142856984e-01
9.107142857142856984e-01
9.107142857142856984e-01
9.047619047619047672e-01
9.047619047619047672e-01
8.988095238095238360e-01
8.928571428571429047e-01
8.869047619047618625e-01
8.869047619047618625e-01
8.809523809523809312e-01
8.809523809523809312e-01
8.750000000000000000e-01
8.571428571428570953e-01
8.452380952380952328e-01
8.273809523809523281e-01
8.214285714285713969e-01
7.797619047619047672e-01
7.738095238095238360e-01
7.440476190476190688e-01
7.202380952380952328e-01
7.023809523809523281e-01
6.785714285714286031e-01
6.488095238095238360e-01
6.190476190476190688e-01
5.892857142857143016e-01
5.476190476190476719e-01
5.059523809523809312e-01
4.761904761904761640e-01
3.988095238095238360e-01
3.750000000000000000e-01
3.452380952380952328e-01
3.214285714285714524e-01
2.857142857142856984e-01
2.678571428571428492e-01
2.321428571428571508e-01
2.083333333333333426e-01
1.845238095238095344e-01
1.190476190476190410e-01
9.523809523809523281e-02
7.142857142857142461e-02
5.952380952380952051e-02
5.357142857142856845e-02
2.976190476190476025e-02
1.190476190476190410e-02
1.190476190476190410e-02
5.952380952380952051e-03
0.000000000000000000e+00
0.000000000000000000e+00
0.000000000000000000e+00
0.000000000000000000e+00
0.000000000000000000e+00
0.000000000000000000e+00
0.000000000000000000e+00
0.000000000000000000e+00
0.000000000000000000e+00
0.000000000000000000e+00
0.000000000000000000e+00
0.000000000000000000e+00
