# Supplementary material for: Misic, a general deep learning-based method for the high-throughput cell segmentation of complex bacterial communities
Source: eLife. 2021 Sep 9;10:e65151. doi: 10.7554/eLife.65151 (PMC8478410; doi:10.7554/eLife.65151)
Supplement: Figure 2—figure supplement 1—source data 7. [file elife-65151-fig2-figsupp1-data7.csv]

9.817073170731707155e-01
9.757575757575757125e-01
9.757575757575757125e-01
9.757575757575757125e-01
9.757575757575757125e-01
9.757575757575757125e-01
9.757575757575757125e-01
9.757575757575757125e-01
9.757575757575757125e-01
9.757575757575757125e-01
9.696969696969697239e-01
9.696969696969697239e-01
9.696969696969697239e-01
9.696969696969697239e-01
9.696969696969697239e-01
9.696969696969697239e-01
9.696969696969697239e-01
9.696969696969697239e-01
9.696969696969697239e-01
9.696969696969697239e-01
9.696969696969697239e-01
9.696969696969697239e-01
9.696969696969697239e-01
9.636363636363636243e-01
9.636363636363636243e-01
9.636363636363636243e-01
9.636363636363636243e-01
9.636363636363636243e-01
9.575757575757575246e-01
9.575757575757575246e-01
9.575757575757575246e-01
9.575757575757575246e-01
9.575757575757575246e-01
9.575757575757575246e-01
9.575757575757575246e-01
9.575757575757575246e-01
9.575757575757575246e-01
9.515151515151515360e-01
9.515151515151515360e-01
9.515151515151515360e-01
9.515151515151515360e-01
9.515151515151515360e-01
9.515151515151515360e-01
9.515151515151515360e-01
9.454545454545454364e-01
9.454545454545454364e-01
9.454545454545454364e-01
9.393939393939394478e-01
9.333333333333333481e-01
9.333333333333333481e-01
9.151515151515151603e-01
9.090909090909090606e-01
9.090909090909090606e-01
9.030303030303030720e-01
9.030303030303030720e-01
8.969696969696969724e-01
8.909090909090908728e-01
8.666666666666666963e-01
8.484848484848485084e-01
8.363636363636363091e-01
8.242424242424242209e-01
7.939393939393939448e-01
7.696969696969696573e-01
7.272727272727272929e-01
6.969696969696970168e-01
6.666666666666666297e-01
6.242424242424242653e-01
5.939393939393939892e-01
5.151515151515151381e-01
4.484848484848484862e-01
3.818181818181818343e-01
3.272727272727272707e-01
2.727272727272727071e-01
2.303030303030303150e-01
1.878787878787878673e-01
1.212121212121212155e-01
9.696969696969696961e-02
7.272727272727272374e-02
6.060606060606060774e-02
4.848484848484848481e-02
3.636363636363636187e-02
1.212121212121212120e-02
1.212121212121212120e-02
1.212121212121212120e-02
6.060606060606060601e-03
0.000000000000000000e+00
0.000000000000000000e+00
0.000000000000000000e+00
0.000000000000000000e+00
0.000000000000000000e+00
0.000000000000000000e+00
0.000000000000000000e+00
0.000000000000000000e+00
0.000000000000000000e+00
0.000000000000000000e+00
0.000000000000000000e+00
0.000000000000000000e+00
0.000000000000000000e+00
0.000000000000000000e+00
0.000000000000000000e+00
