# Supplementary material for: Misic, a general deep learning-based method for the high-throughput cell segmentation of complex bacterial communities
Source: eLife. 2021 Sep 9;10:e65151. doi: 10.7554/eLife.65151 (PMC8478410; doi:10.7554/eLife.65151)
Supplement: Figure 2—figure supplement 1—source data 8. [file elife-65151-fig2-figsupp1-data8.csv]

1.000000000000000000e+00
9.588235294117647411e-01
9.588235294117647411e-01
9.588235294117647411e-01
9.588235294117647411e-01
9.588235294117647411e-01
9.588235294117647411e-01
9.588235294117647411e-01
9.588235294117647411e-01
9.588235294117647411e-01
9.588235294117647411e-01
9.588235294117647411e-01
9.529411764705881804e-01
9.529411764705881804e-01
9.470588235294117307e-01
9.470588235294117307e-01
9.470588235294117307e-01
9.411764705882352811e-01
9.352941176470588314e-01
9.294117647058823817e-01
9.294117647058823817e-01
9.235294117647059320e-01
9.235294117647059320e-01
9.117647058823529216e-01
8.941176470588235725e-01
8.705882352941176627e-01
8.588235294117646523e-01
8.588235294117646523e-01
8.588235294117646523e-01
8.411764705882353033e-01
8.411764705882353033e-01
8.352941176470588536e-01
8.352941176470588536e-01
8.294117647058824039e-01
8.235294117647058432e-01
8.058823529411764941e-01
8.058823529411764941e-01
7.941176470588234837e-01
7.882352941176470340e-01
7.823529411764705843e-01
7.823529411764705843e-01
7.705882352941176849e-01
7.588235294117646745e-01
7.529411764705882248e-01
7.470588235294117752e-01
7.470588235294117752e-01
7.352941176470588758e-01
7.176470588235294157e-01
6.882352941176470562e-01
6.764705882352941568e-01
6.588235294117646967e-01
6.470588235294117974e-01
6.294117647058823373e-01
5.999999999999999778e-01
5.647058823529411686e-01
5.470588235294118196e-01
5.176470588235294601e-01
5.058823529411764497e-01
4.647058823529411908e-01
4.176470588235294268e-01
3.647058823529411575e-01
3.647058823529411575e-01
3.294117647058823484e-01
3.058823529411764941e-01
2.764705882352941346e-01
2.588235294117647300e-01
2.352941176470588203e-01
2.235294117647058931e-01
1.705882352941176516e-01
1.529411764705882470e-01
1.294117647058823650e-01
1.000000000000000056e-01
8.823529411764706454e-02
8.235294117647058709e-02
7.058823529411764608e-02
5.882352941176470507e-02
4.705882352941176405e-02
2.941176470588235253e-02
2.941176470588235253e-02
2.941176470588235253e-02
2.352941176470588203e-02
1.764705882352941152e-02
1.764705882352941152e-02
1.176470588235294101e-02
1.176470588235294101e-02
1.176470588235294101e-02
1.176470588235294101e-02
5.882352941176470507e-03
5.882352941176470507e-03
5.882352941176470507e-03
0.000000000000000000e+00
0.000000000000000000e+00
0.000000000000000000e+00
0.000000000000000000e+00
0.000000000000000000e+00
0.000000000000000000e+00
0.000000000000000000e+00
0.000000000000000000e+00
0.000000000000000000e+00
0.000000000000000000e+00
