# Supplementary material for: Misic, a general deep learning-based method for the high-throughput cell segmentation of complex bacterial communities
Source: eLife. 2021 Sep 9;10:e65151. doi: 10.7554/eLife.65151 (PMC8478410; doi:10.7554/eLife.65151)
Supplement: Figure 2—figure supplement 1—source data 9. [file elife-65151-fig2-figsupp1-data9.csv]

9.940476190476190688e-01
9.823529411764705399e-01
9.823529411764705399e-01
9.823529411764705399e-01
9.823529411764705399e-01
9.823529411764705399e-01
9.823529411764705399e-01
9.823529411764705399e-01
9.823529411764705399e-01
9.823529411764705399e-01
9.823529411764705399e-01
9.823529411764705399e-01
9.823529411764705399e-01
9.823529411764705399e-01
9.764705882352940902e-01
9.764705882352940902e-01
9.764705882352940902e-01
9.764705882352940902e-01
9.647058823529411908e-01
9.647058823529411908e-01
9.647058823529411908e-01
9.647058823529411908e-01
9.588235294117647411e-01
9.588235294117647411e-01
9.588235294117647411e-01
9.588235294117647411e-01
9.588235294117647411e-01
9.529411764705881804e-01
9.529411764705881804e-01
9.529411764705881804e-01
9.411764705882352811e-01
9.411764705882352811e-01
9.294117647058823817e-01
9.294117647058823817e-01
9.294117647058823817e-01
9.294117647058823817e-01
9.294117647058823817e-01
9.235294117647059320e-01
9.117647058823529216e-01
9.058823529411764719e-01
9.000000000000000222e-01
8.941176470588235725e-01
8.882352941176470118e-01
8.823529411764705621e-01
8.705882352941176627e-01
8.529411764705882026e-01
8.352941176470588536e-01
8.117647058823529438e-01
7.941176470588234837e-01
7.823529411764705843e-01
7.470588235294117752e-01
6.999999999999999556e-01
6.764705882352941568e-01
6.705882352941175961e-01
6.294117647058823373e-01
6.294117647058823373e-01
6.117647058823529882e-01
5.882352941176470784e-01
5.588235294117647189e-01
5.235294117647059098e-01
4.882352941176470451e-01
4.294117647058823262e-01
4.058823529411764719e-01
3.882352941176470673e-01
3.411764705882353033e-01
2.999999999999999889e-01
2.882352941176470340e-01
2.764705882352941346e-01
2.411764705882352977e-01
2.058823529411764608e-01
1.764705882352941291e-01
1.588235294117646967e-01
1.235294117647058876e-01
1.117647058823529466e-01
1.000000000000000056e-01
8.235294117647058709e-02
7.647058823529412352e-02
7.058823529411764608e-02
5.294117647058823456e-02
4.117647058823529355e-02
2.941176470588235253e-02
2.352941176470588203e-02
2.352941176470588203e-02
1.764705882352941152e-02
5.882352941176470507e-03
0.000000000000000000e+00
0.000000000000000000e+00
0.000000000000000000e+00
0.000000000000000000e+00
0.000000000000000000e+00
0.000000000000000000e+00
0.000000000000000000e+00
0.000000000000000000e+00
0.000000000000000000e+00
0.000000000000000000e+00
0.000000000000000000e+00
0.000000000000000000e+00
0.000000000000000000e+00
0.000000000000000000e+00
0.000000000000000000e+00
