# Supplementary material for: Misic, a general deep learning-based method for the high-throughput cell segmentation of complex bacterial communities
Source: eLife. 2021 Sep 9;10:e65151. doi: 10.7554/eLife.65151 (PMC8478410; doi:10.7554/eLife.65151)
Supplement: Figure 2—figure supplement 1—source data 10. [file elife-65151-fig2-figsupp1-data10.csv]

9.878048780487804770e-01
9.818181818181818121e-01
9.818181818181818121e-01
9.818181818181818121e-01
9.818181818181818121e-01
9.818181818181818121e-01
9.818181818181818121e-01
9.818181818181818121e-01
9.757575757575757125e-01
9.757575757575757125e-01
9.757575757575757125e-01
9.757575757575757125e-01
9.757575757575757125e-01
9.757575757575757125e-01
9.757575757575757125e-01
9.757575757575757125e-01
9.757575757575757125e-01
9.757575757575757125e-01
9.757575757575757125e-01
9.696969696969697239e-01
9.696969696969697239e-01
9.696969696969697239e-01
9.575757575757575246e-01
9.575757575757575246e-01
9.454545454545454364e-01
9.393939393939394478e-01
9.393939393939394478e-01
9.393939393939394478e-01
9.393939393939394478e-01
9.393939393939394478e-01
9.393939393939394478e-01
9.333333333333333481e-01
9.333333333333333481e-01
9.333333333333333481e-01
9.272727272727272485e-01
9.212121212121212599e-01
9.090909090909090606e-01
9.090909090909090606e-01
9.090909090909090606e-01
9.090909090909090606e-01
8.909090909090908728e-01
8.909090909090908728e-01
8.848484848484848841e-01
8.848484848484848841e-01
8.848484848484848841e-01
8.787878787878787845e-01
8.727272727272726849e-01
8.606060606060605966e-01
8.545454545454544970e-01
8.484848484848485084e-01
8.424242424242424088e-01
8.242424242424242209e-01
8.242424242424242209e-01
7.878787878787878451e-01
7.757575757575757569e-01
7.696969696969696573e-01
7.333333333333332815e-01
7.030303030303030054e-01
6.969696969696970168e-01
6.727272727272727293e-01
6.545454545454545414e-01
6.484848484848484418e-01
6.181818181818181657e-01
5.818181818181817899e-01
5.393939393939394256e-01
4.666666666666666741e-01
4.484848484848484862e-01
4.424242424242424421e-01
3.878787878787878785e-01
3.333333333333333148e-01
2.727272727272727071e-01
2.303030303030303150e-01
1.818181818181818232e-01
1.393939393939394034e-01
1.030303030303030276e-01
8.484848484848485362e-02
8.484848484848485362e-02
6.060606060606060774e-02
4.848484848484848481e-02
4.242424242424242681e-02
3.030303030303030387e-02
2.424242424242424240e-02
1.818181818181818094e-02
1.818181818181818094e-02
6.060606060606060601e-03
6.060606060606060601e-03
6.060606060606060601e-03
6.060606060606060601e-03
6.060606060606060601e-03
0.000000000000000000e+00
0.000000000000000000e+00
0.000000000000000000e+00
0.000000000000000000e+00
0.000000000000000000e+00
0.000000000000000000e+00
0.000000000000000000e+00
0.000000000000000000e+00
0.000000000000000000e+00
0.000000000000000000e+00
0.000000000000000000e+00
