# Supplementary material for: Misic, a general deep learning-based method for the high-throughput cell segmentation of complex bacterial communities
Source: eLife. 2021 Sep 9;10:e65151. doi: 10.7554/eLife.65151 (PMC8478410; doi:10.7554/eLife.65151)
Supplement: Figure 2—source data 3. [file elife-65151-fig2-data3.csv]

9.813084112149532690e-01	9.502262443438913575e-01	9.502262443438913575e-01	9.457013574660633193e-01	9.457013574660633193e-01	9.411764705882352811e-01	9.366515837104072428e-01	9.366515837104072428e-01	9.366515837104072428e-01	9.366515837104072428e-01	9.321266968325792046e-01	9.276018099547511664e-01	9.276018099547511664e-01	9.276018099547511664e-01	9.276018099547511664e-01	9.276018099547511664e-01	9.276018099547511664e-01	9.276018099547511664e-01	9.276018099547511664e-01	9.276018099547511664e-01	9.276018099547511664e-01	9.276018099547511664e-01	9.276018099547511664e-01	9.230769230769231282e-01	9.230769230769231282e-01	9.095022624434389025e-01	9.095022624434389025e-01	9.049773755656108642e-01	8.823529411764705621e-01	8.733031674208144857e-01	8.733031674208144857e-01	8.733031674208144857e-01	8.733031674208144857e-01	8.597285067873303710e-01	8.461538461538461453e-01	8.416289592760181071e-01	8.371040723981900689e-01	8.371040723981900689e-01	8.371040723981900689e-01	8.325791855203620306e-01	8.280542986425338814e-01	8.280542986425338814e-01	8.280542986425338814e-01	8.280542986425338814e-01	8.235294117647058432e-01	8.144796380090497667e-01	8.144796380090497667e-01	8.144796380090497667e-01	8.144796380090497667e-01	8.099547511312217285e-01
8.543689320388349051e-01	8.262910798122066192e-01	8.169014084507042472e-01	8.169014084507042472e-01	8.169014084507042472e-01	8.122065727699530058e-01	8.028169014084507449e-01	7.981220657276995034e-01	7.981220657276995034e-01	7.981220657276995034e-01	7.981220657276995034e-01	7.981220657276995034e-01	7.981220657276995034e-01	7.934272300469483730e-01	7.934272300469483730e-01	7.934272300469483730e-01	7.887323943661971315e-01	7.887323943661971315e-01	7.887323943661971315e-01	7.887323943661971315e-01	7.840375586854460010e-01	7.840375586854460010e-01	7.840375586854460010e-01	7.840375586854460010e-01	7.840375586854460010e-01	7.746478873239436291e-01	7.746478873239436291e-01	7.699530516431924987e-01	7.699530516431924987e-01	7.699530516431924987e-01	7.699530516431924987e-01	7.699530516431924987e-01	7.699530516431924987e-01	7.699530516431924987e-01	7.652582159624413682e-01	7.652582159624413682e-01	7.652582159624413682e-01	7.558685446009389963e-01	7.464788732394366244e-01	7.464788732394366244e-01	7.464788732394366244e-01	7.417840375586854940e-01	7.370892018779342525e-01	7.323943661971831220e-01	7.276995305164318806e-01	7.183098591549296197e-01	7.136150234741783782e-01	7.089201877934272478e-01	6.948356807511737454e-01	6.807511737089202430e-01
9.656862745098039325e-01	9.425837320574163014e-01	9.425837320574163014e-01	9.425837320574163014e-01	9.425837320574163014e-01	9.425837320574163014e-01	9.425837320574163014e-01	9.425837320574163014e-01	9.377990430622009654e-01	9.377990430622009654e-01	9.377990430622009654e-01	9.377990430622009654e-01	9.377990430622009654e-01	9.377990430622009654e-01	9.377990430622009654e-01	9.377990430622009654e-01	9.377990430622009654e-01	9.377990430622009654e-01	9.377990430622009654e-01	9.377990430622009654e-01	9.377990430622009654e-01	9.377990430622009654e-01	9.377990430622009654e-01	9.377990430622009654e-01	9.330143540669856295e-01	9.330143540669856295e-01	9.330143540669856295e-01	9.330143540669856295e-01	9.330143540669856295e-01	9.330143540669856295e-01	9.330143540669856295e-01	9.282296650717702935e-01	9.234449760765550685e-01	9.234449760765550685e-01	9.234449760765550685e-01	9.186602870813397326e-01	9.186602870813397326e-01	9.186602870813397326e-01	9.186602870813397326e-01	9.186602870813397326e-01	9.186602870813397326e-01	9.186602870813397326e-01	9.138755980861243966e-01	9.138755980861243966e-01	9.090909090909090606e-01	9.043062200956937247e-01	9.043062200956937247e-01	9.043062200956937247e-01	9.043062200956937247e-01	8.995215311004784997e-01
9.702380952380952328e-01	9.702380952380952328e-01	9.702380952380952328e-01	9.702380952380952328e-01	9.702380952380952328e-01	9.702380952380952328e-01	9.702380952380952328e-01	9.702380952380952328e-01	9.702380952380952328e-01	9.702380952380952328e-01	9.702380952380952328e-01	9.702380952380952328e-01	9.702380952380952328e-01	9.702380952380952328e-01	9.702380952380952328e-01	9.702380952380952328e-01	9.702380952380952328e-01	9.702380952380952328e-01	9.702380952380952328e-01	9.702380952380952328e-01	9.702380952380952328e-01	9.702380952380952328e-01	9.702380952380952328e-01	9.702380952380952328e-01	9.702380952380952328e-01	9.702380952380952328e-01	9.702380952380952328e-01	9.702380952380952328e-01	9.702380952380952328e-01	9.642857142857143016e-01	9.642857142857143016e-01	9.583333333333333703e-01	9.464285714285713969e-01	9.464285714285713969e-01	9.464285714285713969e-01	9.464285714285713969e-01	9.404761904761904656e-01	9.345238095238095344e-01	9.226190476190476719e-01	9.107142857142856984e-01	9.107142857142856984e-01	9.107142857142856984e-01	9.107142857142856984e-01	9.107142857142856984e-01	9.107142857142856984e-01	9.047619047619047672e-01	9.047619047619047672e-01	8.988095238095238360e-01	8.928571428571429047e-01	8.869047619047618625e-01
[truncated: 50 more columns]
