# Supplementary material for: Misic, a general deep learning-based method for the high-throughput cell segmentation of complex bacterial communities
Source: eLife. 2021 Sep 9;10:e65151. doi: 10.7554/eLife.65151 (PMC8478410; doi:10.7554/eLife.65151)
Supplement: Figure 3—source data 1. [file elife-65151-fig3-data1.csv]

1.000000000000000000e+00	1.000000000000000000e+00	1.000000000000000000e+00	1.000000000000000000e+00	1.000000000000000000e+00	1.000000000000000000e+00	1.000000000000000000e+00	1.000000000000000000e+00	1.000000000000000000e+00	1.000000000000000000e+00	1.000000000000000000e+00	1.000000000000000000e+00	1.000000000000000000e+00	1.000000000000000000e+00	1.000000000000000000e+00	1.000000000000000000e+00	1.000000000000000000e+00	1.000000000000000000e+00	1.000000000000000000e+00	1.000000000000000000e+00	1.000000000000000000e+00	1.000000000000000000e+00	1.000000000000000000e+00	1.000000000000000000e+00	1.000000000000000000e+00	1.000000000000000000e+00	1.000000000000000000e+00	1.000000000000000000e+00	1.000000000000000000e+00	1.000000000000000000e+00	1.000000000000000000e+00	1.000000000000000000e+00	1.000000000000000000e+00	1.000000000000000000e+00	1.000000000000000000e+00	1.000000000000000000e+00	1.000000000000000000e+00	1.000000000000000000e+00	1.000000000000000000e+00	1.000000000000000000e+00	1.000000000000000000e+00	1.000000000000000000e+00	1.000000000000000000e+00	1.000000000000000000e+00	1.000000000000000000e+00	1.000000000000000000e+00	1.000000000000000000e+00	1.000000000000000000e+00	1.000000000000000000e+00	1.000000000000000000e+00
1.000000000000000000e+00	1.000000000000000000e+00	1.000000000000000000e+00	1.000000000000000000e+00	1.000000000000000000e+00	1.000000000000000000e+00	1.000000000000000000e+00	1.000000000000000000e+00	1.000000000000000000e+00	9.428571428571428381e-01	9.428571428571428381e-01	9.142857142857142572e-01	9.142857142857142572e-01	9.142857142857142572e-01	9.142857142857142572e-01	8.857142857142856762e-01	8.857142857142856762e-01	8.857142857142856762e-01	8.857142857142856762e-01	8.857142857142856762e-01	8.857142857142856762e-01	8.857142857142856762e-01	8.857142857142856762e-01	8.857142857142856762e-01	8.857142857142856762e-01	8.857142857142856762e-01	8.857142857142856762e-01	8.857142857142856762e-01	8.571428571428570953e-01	8.571428571428570953e-01	8.285714285714286254e-01	8.285714285714286254e-01	8.285714285714286254e-01	8.000000000000000444e-01	7.714285714285714635e-01	7.714285714285714635e-01	7.714285714285714635e-01	7.142857142857143016e-01	7.142857142857143016e-01	6.857142857142857206e-01	6.857142857142857206e-01	6.857142857142857206e-01	6.571428571428571397e-01	6.571428571428571397e-01	6.571428571428571397e-01	6.571428571428571397e-01	6.571428571428571397e-01	6.571428571428571397e-01	6.285714285714285587e-01	6.285714285714285587e-01
1.000000000000000000e+00	1.000000000000000000e+00	1.000000000000000000e+00	9.166666666666666297e-01	9.166666666666666297e-01	9.166666666666666297e-01	9.166666666666666297e-01	9.166666666666666297e-01	9.166666666666666297e-01	8.750000000000000000e-01	8.750000000000000000e-01	8.750000000000000000e-01	8.750000000000000000e-01	8.750000000000000000e-01	8.750000000000000000e-01	8.333333333333333703e-01	8.333333333333333703e-01	8.333333333333333703e-01	8.333333333333333703e-01	8.333333333333333703e-01	8.333333333333333703e-01	8.333333333333333703e-01	8.333333333333333703e-01	8.333333333333333703e-01	8.333333333333333703e-01	8.333333333333333703e-01	8.333333333333333703e-01	7.916666666666666297e-01	7.916666666666666297e-01	7.916666666666666297e-01	7.500000000000000000e-01	7.083333333333333703e-01	7.083333333333333703e-01	7.083333333333333703e-01	7.083333333333333703e-01	7.083333333333333703e-01	6.666666666666666297e-01	6.666666666666666297e-01	6.666666666666666297e-01	6.666666666666666297e-01	6.250000000000000000e-01	6.250000000000000000e-01	6.250000000000000000e-01	6.250000000000000000e-01	6.250000000000000000e-01	6.250000000000000000e-01	6.250000000000000000e-01	6.250000000000000000e-01	5.833333333333333703e-01	5.833333333333333703e-01
1.000000000000000000e+00	1.000000000000000000e+00	9.090909090909090606e-01	9.090909090909090606e-01	9.090909090909090606e-01	9.090909090909090606e-01	9.090909090909090606e-01	9.090909090909090606e-01	9.090909090909090606e-01	9.090909090909090606e-01	9.090909090909090606e-01	9.090909090909090606e-01	9.090909090909090606e-01	9.090909090909090606e-01	9.090909090909090606e-01	9.090909090909090606e-01	9.090909090909090606e-01	9.090909090909090606e-01	9.090909090909090606e-01	9.090909090909090606e-01	9.090909090909090606e-01	9.090909090909090606e-01	9.090909090909090606e-01	8.181818181818182323e-01	8.181818181818182323e-01	8.181818181818182323e-01	8.181818181818182323e-01	8.181818181818182323e-01	8.181818181818182323e-01	8.181818181818182323e-01	8.181818181818182323e-01	8.181818181818182323e-01	8.181818181818182323e-01	8.181818181818182323e-01	8.181818181818182323e-01	8.181818181818182323e-01	8.181818181818182323e-01	8.181818181818182323e-01	8.181818181818182323e-01	8.181818181818182323e-01	8.181818181818182323e-01	8.181818181818182323e-01	8.181818181818182323e-01	8.181818181818182323e-01	8.181818181818182323e-01	8.181818181818182323e-01	8.181818181818182323e-01	8.181818181818182323e-01	8.181818181818182323e-01	8.181818181818182323e-01
1.000000000000000000e+00	9.565217391304348116e-01	9.565217391304348116e-01	9.565217391304348116e-01	9.565217391304348116e-01	9.565217391304348116e-01	9.565217391304348116e-01	9.565217391304348116e-01	9.565217391304348116e-01	9.565217391304348116e-01	9.565217391304348116e-01	9.565217391304348116e-01	9.565217391304348116e-01	9.565217391304348116e-01	9.565217391304348116e-01	9.565217391304348116e-01	9.565217391304348116e-01	9.565217391304348116e-01	9.565217391304348116e-01	9.130434782608695121e-01	9.130434782608695121e-01	9.130434782608695121e-01	9.130434782608695121e-01	9.130434782608695121e-01	9.130434782608695121e-01	9.130434782608695121e-01	9.130434782608695121e-01	9.130434782608695121e-01	9.130434782608695121e-01	8.695652173913043237e-01	8.695652173913043237e-01	8.695652173913043237e-01	8.260869565217391353e-01	8.260869565217391353e-01	8.260869565217391353e-01	8.260869565217391353e-01	7.826086956521739468e-01	7.826086956521739468e-01	7.826086956521739468e-01	7.826086956521739468e-01	7.826086956521739468e-01	7.826086956521739468e-01	7.826086956521739468e-01	7.826086956521739468e-01	7.826086956521739468e-01	7.826086956521739468e-01	7.826086956521739468e-01	7.391304347826086474e-01	6.956521739130434590e-01	6.956521739130434590e-01
[truncated: 50 more columns]
