# Supplementary material for: Misic, a general deep learning-based method for the high-throughput cell segmentation of complex bacterial communities
Source: eLife. 2021 Sep 9;10:e65151. doi: 10.7554/eLife.65151 (PMC8478410; doi:10.7554/eLife.65151)
Supplement: Figure 3—source data 3. — Thresholds are the same in Figure 2. [file elife-65151-fig3-data3.csv]

9.484536082474226415e-01	8.440366972477064689e-01	8.440366972477064689e-01	8.440366972477064689e-01	8.440366972477064689e-01	8.440366972477064689e-01	8.440366972477064689e-01	8.440366972477064689e-01	8.440366972477064689e-01	8.440366972477064689e-01	8.440366972477064689e-01	8.440366972477064689e-01	8.440366972477064689e-01	8.440366972477064689e-01	8.440366972477064689e-01	8.440366972477064689e-01	8.440366972477064689e-01	8.440366972477064689e-01	8.440366972477064689e-01	8.440366972477064689e-01	8.440366972477064689e-01	8.440366972477064689e-01	8.440366972477064689e-01	8.440366972477064689e-01	8.440366972477064689e-01	8.440366972477064689e-01	8.440366972477064689e-01	8.440366972477064689e-01	8.440366972477064689e-01	8.440366972477064689e-01	8.440366972477064689e-01	8.440366972477064689e-01	8.440366972477064689e-01	8.440366972477064689e-01	8.440366972477064689e-01	8.348623853211009083e-01	8.348623853211009083e-01	8.348623853211009083e-01	8.348623853211009083e-01	8.348623853211009083e-01	8.348623853211009083e-01	8.348623853211009083e-01	8.256880733944954587e-01	8.256880733944954587e-01	8.256880733944954587e-01	8.256880733944954587e-01	8.256880733944954587e-01	8.256880733944954587e-01	8.256880733944954587e-01	8.165137614678898981e-01
9.857142857142857650e-01	8.518518518518518601e-01	8.518518518518518601e-01	8.518518518518518601e-01	8.518518518518518601e-01	8.456790123456789932e-01	8.456790123456789932e-01	8.456790123456789932e-01	8.456790123456789932e-01	8.456790123456789932e-01	8.456790123456789932e-01	8.456790123456789932e-01	8.456790123456789932e-01	8.456790123456789932e-01	8.456790123456789932e-01	8.395061728395061262e-01	8.395061728395061262e-01	8.395061728395061262e-01	8.395061728395061262e-01	8.395061728395061262e-01	8.395061728395061262e-01	8.333333333333333703e-01	8.271604938271605034e-01	8.271604938271605034e-01	8.209876543209876365e-01	8.209876543209876365e-01	8.086419753086420137e-01	8.086419753086420137e-01	7.901234567901234129e-01	7.901234567901234129e-01	7.777777777777777901e-01	7.777777777777777901e-01	7.716049382716049232e-01	7.654320987654320563e-01	7.654320987654320563e-01	7.654320987654320563e-01	7.530864197530864335e-01	7.469135802469135665e-01	7.407407407407406996e-01	7.345679012345679437e-01	7.345679012345679437e-01	7.345679012345679437e-01	7.345679012345679437e-01	7.345679012345679437e-01	7.345679012345679437e-01	7.283950617283950768e-01	7.283950617283950768e-01	7.283950617283950768e-01	7.283950617283950768e-01	7.222222222222222099e-01
9.736211031175060482e-01	8.864628820960698263e-01	8.864628820960698263e-01	8.842794759825327588e-01	8.842794759825327588e-01	8.842794759825327588e-01	8.820960698689955803e-01	8.820960698689955803e-01	8.820960698689955803e-01	8.799126637554585129e-01	8.777292576419214454e-01	8.733624454148471994e-01	8.689956331877729534e-01	8.668122270742357749e-01	8.624454148471615289e-01	8.558951965065502154e-01	8.515283842794759694e-01	8.449781659388646560e-01	8.406113537117904100e-01	8.384279475982532315e-01	8.318777292576419180e-01	8.296943231441048505e-01	8.187772925764191800e-01	8.144104803493449340e-01	8.056768558951965531e-01	8.013100436681223071e-01	7.991266375545851286e-01	7.860262008733623906e-01	7.794759825327510772e-01	7.751091703056768312e-01	7.707423580786025852e-01	7.598253275109170257e-01	7.445414847161572203e-01	7.358078602620087283e-01	7.292576419213974148e-01	7.205240174672489228e-01	7.117903930131004309e-01	7.074235807860261849e-01	6.943231441048034469e-01	6.899563318777293119e-01	6.790393013100436415e-01	6.746724890829693955e-01	6.681222707423580820e-01	6.615720524017467685e-01	6.550218340611353440e-01	6.484716157205240306e-01	6.397379912663755386e-01	6.375545851528384711e-01	6.310043668122270466e-01	6.200873362445414871e-01
9.375000000000000000e-01	8.823529411764705621e-01	8.823529411764705621e-01	8.823529411764705621e-01	8.823529411764705621e-01	8.823529411764705621e-01	8.823529411764705621e-01	8.823529411764705621e-01	8.823529411764705621e-01	8.823529411764705621e-01	8.823529411764705621e-01	8.823529411764705621e-01	8.823529411764705621e-01	8.823529411764705621e-01	8.823529411764705621e-01	8.823529411764705621e-01	8.823529411764705621e-01	8.823529411764705621e-01	8.823529411764705621e-01	8.823529411764705621e-01	8.823529411764705621e-01	8.823529411764705621e-01	8.823529411764705621e-01	8.823529411764705621e-01	8.823529411764705621e-01	8.823529411764705621e-01	8.823529411764705621e-01	8.823529411764705621e-01	8.823529411764705621e-01	8.823529411764705621e-01	8.725490196078431460e-01	8.725490196078431460e-01	8.529411764705882026e-01	8.529411764705882026e-01	8.431372549019607865e-01	8.333333333333333703e-01	8.235294117647058432e-01	8.235294117647058432e-01	8.235294117647058432e-01	8.235294117647058432e-01	8.137254901960784270e-01	8.039215686274510109e-01	8.039215686274510109e-01	8.039215686274510109e-01	7.941176470588234837e-01	7.843137254901960675e-01	7.843137254901960675e-01	7.843137254901960675e-01	7.843137254901960675e-01	7.843137254901960675e-01
1.000000000000000000e+00	8.584905660377358805e-01	8.584905660377358805e-01	8.584905660377358805e-01	8.584905660377358805e-01	8.584905660377358805e-01	8.584905660377358805e-01	8.584905660377358805e-01	8.584905660377358805e-01	8.584905660377358805e-01	8.584905660377358805e-01	8.584905660377358805e-01	8.584905660377358805e-01	8.584905660377358805e-01	8.584905660377358805e-01	8.553459119496855667e-01	8.553459119496855667e-01	8.553459119496855667e-01	8.553459119496855667e-01	8.553459119496855667e-01	8.522012578616352529e-01	8.522012578616352529e-01	8.522012578616352529e-01	8.522012578616352529e-01	8.459119496855346254e-01	8.427672955974843116e-01	8.427672955974843116e-01	8.427672955974843116e-01	8.427672955974843116e-01	8.396226415094339979e-01	8.364779874213836841e-01	8.333333333333333703e-01	8.207547169811321153e-01	8.207547169811321153e-01	8.207547169811321153e-01	8.207547169811321153e-01	8.207547169811321153e-01	8.176100628930818015e-01	8.144654088050314877e-01	8.081761006289308602e-01	8.018867924528302327e-01	7.987421383647799189e-01	7.955974842767296051e-01	7.955974842767296051e-01	7.955974842767296051e-01	7.955974842767296051e-01	7.924528301886792914e-01	7.924528301886792914e-01	7.830188679245283501e-01	7.798742138364780363e-01
[truncated: 50 more columns]
