# Supplementary material for: Misic, a general deep learning-based method for the high-throughput cell segmentation of complex bacterial communities
Source: eLife. 2021 Sep 9;10:e65151. doi: 10.7554/eLife.65151 (PMC8478410; doi:10.7554/eLife.65151)
Supplement: Figure 4—figure supplement 1—source data 1. [file elife-65151-fig4-figsupp1-data1.xlsx]

## Sheet: Sheet1
		NOISE	MISIC				SuperSegger
			Dice				Dice
				MEAN	STD			MEAN	STD
	*	0.001		0.774982	0.312152			0.855183	0.0253722
	*	0.0025		0.769295	0.286749			0.727883	0.072526
	*	0.005		0.817782	0.173199			0.594942	0.121994
	*	0.01		0.821207	0.111881			0	0
	*	0.025		0.588536	0.20125			0	0
	*	0.05		0.145905	0.146383			0	0
