# Supplementary material for: Misic, a general deep learning-based method for the high-throughput cell segmentation of complex bacterial communities
Source: eLife. 2021 Sep 9;10:e65151. doi: 10.7554/eLife.65151 (PMC8478410; doi:10.7554/eLife.65151)
Supplement: Figure 4—source data 1. [file elife-65151-fig4-data1.csv]

NAME	PARENT	POSITION	len	x1.normalized.x	x1.orthogonal.x
m667	b3	1	8.52028	0.9739525	4.149163
m131	b4	1	5.134294	1.0181574	2.6137578
m124	b6	1	8.37621	1.040908	4.359435
m142	b7	1	2.8846009	0.93692	1.3513197
m1068	b8	1	4.800063	0.9797761	2.3514946
m646	b9	1	2.392518	0.91583127	1.0955708
m354	b11	1	2.2443008	1.0771439	1.2087171
m641	b12	1	6.5939503	1.0454841	3.4469357
m1138	b13	1	5.8024526	1.0619186	3.0808678
m105	b14	1	3.4385555	1.1209304	1.9271897
m1441	b15	1	3.6878326	1.0511538	1.938242
m980	b20	1	2.2817323	1.1757467	1.3413655
m352	b22	1	2.8539906	1.0255731	1.4634863
m448	b23	1	5.42129	1.0294629	2.7905097
m268	b25	1	6.855643	1.0757943	3.687631
m586	b26	1	3.1929843	1.1797783	1.8835047
m398	b28	1	1.552219	1.3081627	1.0152793
m953	b29	1	3.0103467	1.1904868	1.7918875
m1056	b31	1	5.6266847	1.0405316	2.9273696
m868	b32	1	5.823474	0.99807835	2.9061413
m169	b36	1	4.589349	1.0717163	2.45924
m225	b45	1	7.482015	1.0070597	3.7674167
m371	b48	1	1.6847539	1.2728128	1.0721867
m1167	b52	1	2.4510825	1.214816	1.4888043
m326	b54	1	2.5716844	1.0637194	1.3677762
m292	b55	1	6.14735	1.0366337	3.186275
m882	b56	1	2.0244057	1.1526936	1.1667601
m691	b57	1	4.370708	0.96932197	2.1183116
m1201	b58	1	5.2216067	1.014818	2.6494927
m183	b60	1	5.8835597	1.0306556	3.0319648
m1529	b62	1	3.8036366	1.0633316	2.0222616
m147	b63	1	1.5913969	1.1656102	0.9274756
m232	b65	1	2.3014364	1.243613	1.431049
m487	b67	1	6.9765177	0.9858032	3.4387436
m577	b68	1	6.782687	1.0298461	3.4925597
m1008	b71	1	3.7382715	0.958351	1.7912873
m814	b72	1	2.0278292	1.2355969	1.2527887
m441	b73	1	4.9534655	1.0580121	2.620414
m1333	b75	1	3.8190198	1.0597336	2.0235722
m651	b76	1	3.5870821	1.0134485	1.8176595
m1147	b77	1	4.9073844	1.0489446	2.573789
m613	b78	1	4.8430223	1.0829942	2.6224825
m496	b81	1	2.6073017	1.0595958	1.3813428
m154	b86	1	6.562894	1.0252714	3.364375
m1343	b87	1	2.2717295	1.1364149	1.2908127
m958	b88	1	5.0642705	1.0240532	2.5930405
m806	b89	1	5.827986	1.0704088	3.1191611
m81	b91	1	4.9411736	0.97589105	2.4110236
m1314	b95	1	1.429445	1.3355403	0.9545412
m733	b96	1	2.7536042	1.2121269	1.668858
m773	b97	1	6.1346607	1.0724701	3.2896185
m1261	b103	1	5.2617545	1.0208861	2.6858244
m1356	b106	1	3.200775	1.1356951	1.8175533
m826	b107	1	4.6946015	1.0942768	2.5685961
m945	b108	1	5.8654714	1.0481663	3.0739927
m337	b111	1	5.1469774	1.0133862	2.6079361
m591	b113	1	8.939616	1.0544137	4.7130394
m1402	b115	1	1.3516016	1.469732	0.9932472
m908	b116	1	4.209434	1.0207477	2.1483867
m859	b117	1	4.5088825	1.1201845	2.525389
m567	b120	1	4.1411304	1.1048017	2.2875652
m812	b121	1	4.213471	1.028872	2.1675591
m1522	b122	1	4.8914976	1.113485	2.7233026
m658	b124	1	5.496727	1.0676236	2.9342196
m623	b125	1	4.347982	1.0622925	2.3094144
m918	b128	1	5.1621146	1.0240151	2.6430404
m747	b129	1	3.567191	1.0597591	1.8901831
m1334	b129	1	3.567191	-0.8790986	-1.567955
m72	b136	1	7.0243497	1.0205708	3.5844228
m427	b139	1	4.607982	1.0593039	2.4406254
m1025	b140	1	3.9568105	1.019108	2.0162082
m318	b141	1	5.3139377	1.0645567	2.8284936
m634	b143	1	6.7193227	1.0251505	3.444157
m1103	b145	1	6.2022743	1.0784925	3.3445535
m1119	b147	1	4.737739	1.1201333	2.6534486
m257	b148	1	5.3321924	1.0945954	2.9182954
m1143	b151	1	3.4719381	1.1455307	1.9886061
m622	b153	1	5.755876	1.1116275	3.1991973
m477	b157	1	5.035373	1.0680348	2.6889753
m552	b159	1	4.6233754	1.132968	2.6190662
m1012	b160	1	29.260223	1.0052688	14.707195
m281	b165	1	6.9657373	1.0109624	3.5210495
m436	b168	1	13.87645	1.0116464	7.0190277
m397	b169	1	4.7515097	1.0347897	2.4584167
m1477	b172	1	5.9390965	1.0835582	3.217677
m38	b175	1	6.185342	1.0464305	3.236267
m299	b177	1	6.3924713	1.0389376	3.3206792
m234	b178	1	4.8280387	1.0144082	2.448801
m970	b181	1	7.9076753	1.0157062	4.0159335
m393	b182	1	5.2082148	1.0858842	2.8277602
m921	b184	1	6.4816766	1.0604885	3.4368696
m127	b185	1	5.097628	1.119489	2.85337
m1118	b186	1	3.8313098	1.1143961	2.1348002
m1269	b189	1	4.2545786	1.0976828	2.3350885
m251	b190	1	5.921281	1.099356	3.2547984
m1222	b191	1	3.7570417	1.0454572	1.9639142
m1027	b194	1	3.2719634	1.0713214	1.7526636
m810	b203	1	3.7234964	1.0851856	2.020344
m1542	b204	1	1.9980302	0.93836516	0.9374412
m181	b205	1	4.9502482	1.0725822	2.6547742
m880	b206	1	10.807127	1.027608	5.5527434
m1061	b216	1	5.9898157	0.9632779	2.88493
m18	b218	1	6.1116676	1.0144739	3.1000676
m781	b219	1	5.0903325	1.0443766	2.6581092
m437	b221	1	5.912539	1.0370542	3.0658088
m249	b223	1	5.1233525	1.0330426	2.6463177
m151	b224	1	6.385479	1.0981416	3.506082
m805	b225	1	3.864613	1.1024233	2.1302173
m892	b226	1	4.60046	1.0290998	2.3671687
m1427	b227	1	8.721803	-1.0515206	-4.5855775
m1540	b227	1	8.721803	1.0576252	4.612199
m573	b228	1	5.8693414	1.0981209	3.2226245
m422	b230	1	8.007175	1.0421319	4.1722407
m1110	b231	1	4.3098845	1.0775384	2.3220305
m153	b233	1	3.9463995	1.1094114	2.1890929
m556	b234	1	4.338556	1.0668823	2.31436
m996	b238	1	4.942876	1.1167938	2.7600832
m1281	b239	1	3.9129188	1.150852	2.2515938
m22	b240	1	2.1087012	1.188492	1.2530859
m51	b242	1	6.455618	1.0663211	3.4418766
m630	b243	1	6.093244	1.0408295	3.1710145
m929	b245	1	5.736529	1.0943936	3.139003
m461	b247	1	8.075039	1.0637512	4.2949133
m84	b249	1	3.9009168	1.059059	2.0656536
m101	b250	1	5.637183	1.0141541	2.858483
m1386	b251	1	4.495375	1.1036136	2.4805748
m933	b252	1	4.4374495	1.0475011	2.3241165
m590	b253	1	3.052147	1.0834548	1.6534351
m32	b254	1	6.0445657	1.0707065	3.2359815
m193	b256	1	3.130017	1.1383996	1.7816049
m66	b257	1	6.0501285	0.9909185	2.9975946
m1425	b258	1	5.124929	1.07998	2.7674115
m115	b259	1	4.499786	1.0878938	2.4476457
m28	b261	1	6.2124653	1.0110291	3.1404903
m864	b263	1	4.417988	1.1156604	2.4644856
m1420	b264	1	2.6994915	1.2164812	1.6419376
m67	b265	1	8.228919	1.0333555	4.251695
m1240	b266	1	3.63525	1.1264257	2.0474222
m230	b268	1	5.981877	0.95628446	2.8601854
m1320	b269	1	6.1871834	1.0715059	3.3147988
m797	b270	1	4.696019	1.066684	2.5045874
m98	b271	1	6.173384	1.0256803	3.1659622
m158	b274	1	8.146757	0.9973364	4.062529
m387	b275	1	3.823696	1.0945265	2.0925684
m674	b276	1	7.3562655	1.0334836	3.8012927
m664	b277	1	2.6020567	1.0585614	1.3772187
m23	b279	1	8.818494	1.0288401	4.5364094
m262	b280	1	4.095693	1.0770485	2.2056303
m640	b281	1	2.8310301	1.0696268	1.5140713
m1387	b283	1	1.8286718	1.0658227	0.97452176
m19	b286	1	9.397113	0.98433685	4.6249638
m695	b287	1	2.2801888	1.1938508	1.3611054
m1272	b288	1	2.8700485	1.2013013	1.7238966
m1469	b289	1	6.7539706	1.0589899	3.5761967
m617	b294	1	3.4062848	1.1814536	2.0121844
m373	b295	1	2.6899962	1.1759306	1.581629
m1011	b298	1	5.6050663	1.1201537	3.1392713
m68	b301	1	5.471947	1.0570422	2.89204
m242	b303	1	4.5344934	1.12293	2.5459604
m480	b304	1	4.1663375	1.1209255	2.3350813
m164	b306	1	6.6118884	1.089163	3.6007082
m364	b307	1	4.869449	1.0445784	2.5432572
m811	b308	1	5.0011663	1.0730256	2.6831896
m959	b309	1	10.097388	1.0377113	5.2390866
m368	b311	1	4.2193065	1.0920135	2.3037722
m1493	b313	1	3.8872788	1.079257	2.0976877
m1125	b314	1	5.183332	1.0959893	2.8404377
m79	b315	1	5.619826	0.9625501	2.704682
m635	b317	1	4.0881195	1.1054528	2.2596097
m1462	b318	1	3.9010575	1.0107088	1.9714124
m968	b319	1	3.135303	1.1516662	1.8054144
m171	b320	1	6.138067	1.0931828	3.3550138
m1183	b322	1	6.8969936	1.0021635	3.4559605
m229	b326	1	5.0758758	1.1088495	2.8141906
m934	b327	1	5.1903467	1.0592307	2.7488914
m1193	b328	1	8.7775345	1.0356961	4.545426
m505	b329	1	7.124092	1.042879	3.714782
m827	b330	1	3.1656017	1.1483072	1.8175397
m21	b332	1	7.286908	1.0546802	3.8426793
m157	b333	1	2.4987333	1.2048051	1.505249
m657	b334	1	7.060067	1.0672778	3.7675312
m553	b335	1	2.3410034	1.079119	1.2631121
m453	b337	1	4.7710457	1.0298827	2.4568062
m1417	b338	1	4.057772	1.0539675	2.1383772
m194	b339	1	4.448065	1.0551915	2.346776
m1227	b341	1	4.7822847	1.052686	2.517125
m82	b342	1	6.195154	1.056435	3.2723873
m9	b345	1	7.3565493	1.0519975	3.869536
m1172	b346	1	5.1263003	1.0717099	2.7469492
m444	b347	1	5.5927444	1.1071461	3.0959878
m288	b349	1	4.249091	1.0886168	2.312815
m280	b350	1	5.929532	1.0706674	3.174281
m1309	b351	1	4.2284117	1.1622281	2.457188
m125	b352	1	4.8731112	1.0455987	2.5476568
m188	b354	1	5.9104238	1.1112872	3.2840896
m269	b355	1	2.8764083	1.0206544	1.467913
m77	b358	1	4.048253	1.0958456	2.2181337
m1456	b360	1	4.1307955	1.0356476	2.1390204
m755	b361	1	1.9951298	1.3213451	1.3181312
m863	b362	1	4.180908	1.0729132	2.2428758
m315	b363	1	4.3843703	1.1297069	2.4765244
m701	b364	1	4.9292126	1.1367527	2.801647
m104	b366	1	6.3420362	1.0913079	3.4605575
m599	b368	1	5.225786	1.049906	2.7432926
m24	b371	1	7.409803	1.0336362	3.829514
m541	b372	1	3.1144514	1.1346223	1.766863
m261	b373	1	6.705774	1.0170947	3.4102023
m491	b374	1	5.574148	1.0650445	2.9683564
m1594	b376	1	3.6315947	1.0075238	1.8294573
m540	b377	1	1.8998715	1.074004	1.0202336
m63	b378	1	10.974046	1.0381434	5.6963134
m247	b379	1	6.410223	1.0856643	3.4796722
m941	b380	1	5.3198676	1.0357295	2.7549696
m328	b381	1	4.404569	1.0813789	2.3815005
m895	b382	1	1.6330216	1.1261901	0.919549
m215	b385	1	5.4541483	1.1065822	3.0177362
m384	b386	1	12.724782	1.027612	6.5380726
m802	b387	1	5.331369	1.0386175	2.7686262
m1087	b388	1	5.1014123	1.069382	2.7276742
m42	b389	1	6.67058	1.0400497	3.468864
m874	b391	1	4.591393	1.1199752	2.5711267
m155	b394	1	1.3606325	0.9996	0.6800448
m718	b395	1	5.417428	1.085216	2.9395378
m14	b396	1	9.055024	1.0398221	4.7078075
m345	b397	1	4.836024	1.0755112	2.6005957
m343	b398	1	4.8922176	1.1140151	2.7250051
m132	b399	1	7.7915983	1.0656275	4.151469
m26	b400	1	7.1794953	1.0558183	3.790117
m1338	b401	1	3.3008459	1.0991335	1.8140324
m481	b402	1	4.3597555	1.0703863	2.3333077
m198	b405	1	5.8294244	1.0330316	3.0109909
m231	b406	1	1.487778	1.341415	0.997863
m197	b409	1	8.190043	1.0446285	4.277774
m971	b411	1	5.279543	1.083812	2.8610196
m661	b413	1	4.167954	1.0659492	2.221415
m800	b415	1	5.410287	1.1236999	3.039764
m179	b417	1	8.777219	1.0424424	4.574875
m434	b418	1	6.7884517	1.0717562	3.6377828
m287	b420	1	5.2742767	1.0834504	2.8572102
m25	b421	1	4.1187716	1.1359847	2.3394325
m498	b425	1	3.4093482	1.0631657	1.8123468
m983	b426	1	4.5972543	1.0807889	2.4843266
m519	b427	1	4.3178005	1.1367886	2.4542184
m841	b428	1	3.4653137	1.1289349	1.9560583
m90	b429	1	2.5632403	1.2317302	1.578614
m395	b430	1	4.78444	1.1114106	2.658744
m1207	b433	1	4.585749	1.0945402	2.5096416
m254	b434	1	7.168542	1.0645002	3.8154573
m742	b435	1	2.161838	1.2832243	1.3870645
m1530	b437	1	2.8527005	1.0359704	1.477655
m694	b438	1	4.562311	1.0339903	2.3586912
m581	b440	1	3.6504123	1.054046	1.9238514
m857	b441	1	3.8460846	1.0722228	2.0619233
m418	b442	1	4.126216	1.0591166	2.1850765
m539	b444	1	4.6322827	1.1122061	2.5760262
m940	b445	1	6.939404	0.9992531	3.467114
m4	b446	1	11.38171	1.00712	5.7313747
m165	b447	1	5.664086	1.0844165	3.0711136
m78	b448	1	4.190857	1.0934753	2.2913008
m167	b449	1	5.9098763	1.0569214	3.12314
m1286	b451	1	3.4509625	1.1771948	2.0312314
m891	b453	1	4.334374	1.1084131	2.402134
m348	b454	1	4.5395637	1.0195973	2.314264
m400	b457	1	4.205158	1.0656614	2.2406373
m219	b459	1	4.36883	1.0987697	2.4001703
m327	b460	1	5.6757803	1.1054517	3.1371505
m336	b462	1	6.3037252	0.99484104	3.1356
m744	b465	1	5.7037783	1.0887474	3.10499
m721	b467	1	4.504886	1.0656211	2.4002483
m342	b468	1	5.1162705	1.0456299	2.6748626
m2	b469	1	11.092938	0.9994234	5.5432715
m6	b470	1	5.8797684	1.0199344	2.9984918
m1496	b471	1	3.7288365	0.9319695	1.7375798
m954	b473	1	3.9392552	1.1647032	2.2940292
m350	b474	1	3.853721	1.1676439	2.2498868
m699	b478	1	5.7779365	1.0744615	3.1040878
m355	b479	1	3.0343113	1.0410163	1.5793815
m107	b480	1	1.7348561	1.1879497	1.0304581
m1526	b481	1	2.8420606	1.093544	1.5539616
m163	b483	1	6.6172566	1.0705549	3.5420706
m396	b485	1	4.691339	1.116318	2.6185157
m250	b489	1	5.465621	1.0962521	2.99585
m501	b490	1	1.4538716	1.2959312	0.94205946
m39	b491	1	6.5894055	1.0844803	3.5730376
m1271	b492	1	3.5065653	1.1493353	2.0151062
m563	b493	1	1.9673498	1.2475786	1.2272089
m1066	b494	1	4.774294	1.01699	2.4277072
m708	b495	1	4.87769	1.0730311	2.6169655
m186	b496	1	4.460134	1.0446187	2.3295734
m1065	b497	1	4.3875136	1.0847851	2.3797557
m1076	b498	1	4.394394	1.0100609	2.2189667
m1379	b500	1	3.6475525	1.145126	2.0884578
m769	b501	1	3.9333153	1.040689	2.0466778
m521	b502	1	4.751077	1.0597413	2.5174549
m757	b503	1	6.141076	1.0920502	3.353177
m1163	b506	1	3.4327393	1.1039541	1.8947916
m867	b509	1	4.0150557	1.1421969	2.2929893
m271	b510	1	5.230031	1.0755218	2.812509
m853	b511	1	4.7242513	0.95445126	2.2545342
m550	b512	1	4.1482973	1.0749953	2.2297041
m831	b516	1	1.9831251	1.2092507	1.1990502
m782	b518	1	4.47783	1.1149192	2.496212
m202	b519	1	4.042714	1.0778325	2.1786814
m558	b520	1	6.1066666	1.0611258	3.2399716
m369	b521	1	5.5555296	1.0904491	3.0290096
m11	b528	1	7.357573	1.0651907	3.9186118
m754	b529	1	4.418855	1.1112969	2.4553342
m1159	b530	1	5.1794815	1.0186688	2.6380904
m1431	b531	1	3.713588	1.1721377	2.176416
m960	b532	1	2.6471763	1.1209006	1.4836125
m455	b536	1	5.313292	1.1096834	2.9480321
m468	b537	1	3.93195	1.1353288	2.2320256
m1388	b538	1	7.310278	1.0065436	3.6790597
m1527	b539	1	4.16034	1.0070455	2.0948267
m735	b540	1	5.539705	1.1185023	3.09809
m191	b541	1	4.619836	1.0768791	2.4875047
m942	b542	1	4.881346	1.0904509	2.6614358
m1445	b545	1	3.4820256	1.0980878	1.9117885
m1409	b547	1	8.38171	-1.0645123	-4.461216
m1604	b547	1	8.38171	1.0622381	4.451686
m45	b548	1	4.8870397	1.0853893	2.6521668
m849	b549	1	3.7477753	1.1514152	2.1576204
m720	b552	1	4.499861	1.0530664	2.369329
m270	b553	1	5.298589	1.0516826	2.7862163
m1432	b554	1	3.94502	1.0208697	2.0136788
m190	b556	1	7.1938696	1.0444596	3.7568529
m1224	b557	1	3.1206203	1.0543855	1.64517
m542	b558	1	4.989787	1.1124858	2.7755337
m305	b559	1	5.108004	1.1090425	2.8324938
m449	b561	1	4.2868037	1.0894992	2.3352363
m1082	b562	1	2.7051322	1.180239	1.5963486
m74	b563	1	7.014912	1.0571496	3.7079034
m313	b564	1	3.6223524	1.0590422	1.9181137
m403	b565	1	4.4882746	1.0527666	2.362555
m615	b566	1	3.8421133	0.9822107	1.8868822
m356	b567	1	5.356607	1.0903262	2.9202206
m73	b569	1	6.5792637	1.0252954	3.3728428
m490	b571	1	4.9405284	1.0644331	2.6294272
m1047	b572	1	3.8727257	1.0813566	2.0938993
m50	b573	1	7.9155383	1.0177666	4.0280886
m1325	b574	1	4.1943626	1.1012217	2.3094647
m143	b575	1	6.8169875	1.0457457	3.5644186
m86	b576	1	6.0508213	1.0891677	3.2951756
m13	b577	1	6.3198133	1.0471834	3.309003
m1476	b578	1	3.96054	1.1079303	2.194
m44	b579	1	5.16646	1.0539982	2.7227218
m981	b581	1	4.028846	1.0561938	2.1276202
m102	b583	1	8.650449	1.0758201	4.653166
m311	b584	1	4.295385	1.1047804	2.3727288
m1089	b586	1	3.6214514	1.1319594	2.0496705
m515	b591	1	7.476448	1.0379637	3.8801436
m314	b592	1	5.4701886	1.0818844	2.9590514
m522	b594	1	4.330502	1.1341208	2.4556546
m404	b595	1	6.0205736	1.0842142	3.263797
m492	b597	1	3.3396072	0.98707247	1.6482183
m300	b598	1	6.186004	1.0656885	3.2961795
m1516	b599	1	5.3931584	0.9644678	2.6007614
m65	b600	1	6.3341713	1.0749233	3.4043705
m61	b601	1	3.0539389	1.0868053	1.6595228
m1026	b603	1	4.6094713	1.1512729	2.6533768
m911	b605	1	4.844237	1.0992231	2.6624458
m70	b606	1	2.7515635	1.0821203	1.4887582
m990	b607	1	2.9548202	1.2021632	1.7760874
m815	b608	1	3.40741	1.1285526	1.9227225
m1245	b609	1	4.714025	1.1381605	2.6826575
m80	b610	1	9.112255	1.0707393	4.8784246
m253	b611	1	7.190616	1.0218759	3.6739573
m49	b612	1	9.456659	1.0234693	4.8393016
m178	b614	1	2.7511923	1.0872169	1.4955709
m138	b615	1	5.7050133	1.0789268	3.0776427
m751	b616	1	4.651123	1.1261158	2.6188548
m310	b617	1	5.2240367	1.1172107	2.9181728
m717	b619	1	4.8880053	1.0879881	2.6590497
m1095	b621	1	5.6565237	1.0193532	2.8829987
m603	b622	1	5.09215	1.057481	2.6924245
m283	b623	1	11.4888115	1.0382507	5.9641395
m351	b625	1	1.3755993	1.077837	0.7413382
m144	b626	1	6.605977	1.0640054	3.5143976
m886	b628	1	3.415669	1.1396714	1.9463712
m278	b630	1	4.403787	1.0805007	2.3791437
m1457	b632	1	3.312377	1.175633	1.947069
m531	b633	1	6.3972297	0.9939102	3.1791372
m997	b634	1	6.1189737	1.0940452	3.3472211
m876	b636	1	5.6265025	1.0463306	2.943593
m35	b638	1	8.374629	1.0642059	4.456165
m1561	b638	1	8.374629	-1.0238522	-4.2871904
m554	b639	1	5.04077	1.098564	2.7688031
m572	b641	1	5.0681686	1.1301388	2.8638706
m1285	b642	1	2.764244	1.1873659	1.6410841
m1384	b643	1	2.6142075	1.1935308	1.5600717
m1042	b645	1	5.393276	1.0188688	2.7475204
m703	b646	1	7.446089	1.0837696	4.0349193
m121	b647	1	5.4674907	1.0583481	2.8932548
m1032	b648	1	5.6234536	1.0805917	3.0383277
m740	b650	1	5.620648	1.0961267	3.080467
m991	b651	1	5.0684094	1.0630729	2.694041
m1210	b652	1	3.9994075	1.1335994	2.2668605
m340	b655	1	6.097443	1.0448909	3.185582
m409	b656	1	4.4132986	1.0453516	2.306729
m454	b657	1	2.6399243	1.1638657	1.5362587
m297	b658	1	3.6983058	1.0241047	1.8937255
m752	b659	1	4.293727	1.0464672	2.2466228
m123	b660	1	5.5079365	1.0198379	2.808606
m1241	b661	1	6.9485707	0.9837209	3.417728
m244	b663	1	5.986437	1.0765095	3.2222257
m1019	b664	1	3.7971852	1.0718702	2.0350454
m276	b665	1	3.9009852	0.9539144	1.860603
m192	b666	1	8.155729	1.068827	4.358531
m890	b670	1	12.840622	1.0118423	6.4963393
m465	b671	1	6.4043846	0.9787877	3.1342669
m1141	b673	1	5.6300273	1.0977266	3.0901155
m380	b674	1	7.494045	1.0701059	4.0097084
m1518	b675	1	4.064883	1.0093303	2.0514042
m982	b676	1	4.4606304	1.0450764	2.3308449
m1228	b677	1	2.5194073	1.1549565	1.4549074
m549	b679	1	4.24695	1.0313053	2.1899505
m1148	b680	1	3.787576	1.1811094	2.2367716
m600	b681	1	5.121159	1.1181748	2.8631768
m332	b683	1	2.4741917	1.0923246	1.3513105
m1211	b685	1	3.862501	1.0886413	2.1024408
m439	b689	1	4.956585	1.0773451	2.6699784
m238	b690	1	7.0851145	1.0977888	3.888983
m456	b691	1	3.4058912	1.1401575	1.9416249
m715	b692	1	3.240588	1.1600776	1.8796705
m175	b693	1	6.9311976	1.0417206	3.6101854
m1504	b693	1	6.9311976	-1.0924906	-3.786134
m402	b694	1	3.5744698	1.0325509	1.8454121
m64	b697	1	6.824003	1.070798	3.6535685
m536	b699	1	7.395005	1.0713255	3.9612255
m1230	b700	1	5.8640704	1.0635388	3.1183343
m359	b701	1	5.9969683	1.0513172	3.152354
m605	b702	1	4.538184	1.0981331	2.4917684
m629	b703	1	3.4456172	1.122033	1.9330496
m1015	b704	1	3.8051147	1.1128082	2.1171837
m1557	b704	1	3.8051147	-1.1537392	-2.1950529
m907	b705	1	3.676387	1.0860153	1.9963043
m426	b706	1	4.6801496	1.0656588	2.4937208
m726	b707	1	3.3745024	1.0798678	1.8220074
m912	b708	1	3.459398	1.0850525	1.8768148
m55	b709	1	9.302924	1.0013609	4.657791
m177	b710	1	4.37418	1.08781	2.3791392
m579	b711	1	5.865777	1.0351104	3.035873
m946	b712	1	4.722904	1.0678512	2.5216815
m365	b713	1	2.432926	1.1330667	1.3783329
m756	b714	1	4.513721	1.1452682	2.584711
m430	b716	1	5.609366	1.0595781	2.9717777
m727	b717	1	6.2462506	1.0384487	3.2432039
m533	b718	1	1.9549738	1.082801	1.0584264
m592	b720	1	4.267825	1.1295913	2.4104462
m386	b721	1	5.7352767	1.0474623	3.003746
m1531	b724	1	3.1343808	1.1623553	1.8216306
m1299	b728	1	3.9465268	1.0927434	2.1562748
m642	b730	1	5.692592	1.0571928	3.0090873
m909	b731	1	3.9252396	1.0556848	2.071911
m618	b733	1	4.386451	1.0531142	2.3097155
m319	b734	1	7.324757	0.98293394	3.5998793
m160	b735	1	2.5423598	1.1650584	1.4810034
m731	b736	1	4.0234056	1.049806	2.1118958
m317	b737	1	5.344522	1.0929593	2.920672
m883	b738	1	4.6537266	0.9478637	2.2055507
m399	b739	1	6.438636	1.1019921	3.5476663
m499	b741	1	4.3141947	1.1095699	2.393447
m509	b742	1	1.9769449	1.1890087	1.175307
m1039	b743	1	4.937631	1.0081509	2.4889395
m185	b744	1	4.157827	0.9871143	2.0521255
m1178	b745	1	6.709592	1.0739385	3.6028445
m361	b746	1	3.935823	1.1407038	2.2448037
m344	b747	1	3.2170703	1.1379807	1.8304824
m156	b748	1	7.2187414	1.0315295	3.7231717
m471	b749	1	5.08726	1.0528508	2.678059
m235	b751	1	5.4409266	1.0203846	2.775918
m94	b752	1	1.296749	0.927745	0.60152614
m593	b753	1	5.109403	1.0220623	2.6110632
m1454	b754	1	1.7540108	1.2022153	1.0543491
m705	b755	1	4.5442877	1.1295732	2.5665526
m1212	b758	1	4.5337367	1.0695568	2.4245453
m214	b761	1	3.3799677	1.1686985	1.9750828
m783	b762	1	3.7663593	1.0844133	2.0421455
m537	b764	1	5.012548	0.99987555	2.505965
m479	b765	1	11.827507	1.0172346	6.015674
m71	b766	1	5.6121726	1.0487708	2.942943
m129	b768	1	6.80723	1.0291605	3.5028622
m582	b769	1	4.5657225	0.98488355	2.2483506
m324	b770	1	2.9248273	1.1465566	1.6767354
m974	b774	1	3.9078367	1.1287934	2.2055752
m211	b775	1	4.0368	1.0965071	2.2131875
m1014	b776	1	3.1367977	1.023428	1.6051394
m508	b777	1	4.267084	1.0627254	2.267373
m146	b780	1	3.722449	1.0971462	2.042034
m858	b781	1	4.886542	1.0931722	2.6709163
m899	b782	1	2.8734732	1.1127254	1.598698
m1038	b783	1	2.7343092	1.0883799	1.4879827
m1300	b785	1	3.3239157	1.1747732	1.95242
m785	b787	1	5.620165	0.96045566	2.698964
m844	b788	1	2.5952346	1.1479442	1.4895954
m176	b791	1	6.7132225	1.0456017	3.5096786
m1450	b796	1	2.6015382	0.9473401	1.2322679
m62	b797	1	4.5943365	1.049765	2.4114835
m145	b798	1	5.2437296	1.04568	2.7416332
m358	b799	1	1.7770011	0.99445695	0.88357604
m643	b800	1	5.6753044	1.0514995	2.9837866
m1294	b802	1	2.4817712	1.0644149	1.3208212
m1390	b803	1	4.268088	1.0937366	2.334084
m10	b804	1	10.743265	1.0260265	5.511436
m1330	b806	1	3.805297	1.1231396	2.1369379
m1013	b807	1	3.919916	1.1265291	2.2079484
m1293	b808	1	2.2424626	1.0127012	1.1354728
m182	b809	1	5.510139	1.0363988	2.8553462
m457	b812	1	5.867304	1.0654413	3.1256316
m1274	b812	1	5.867304	-1.057686	-3.1028848
m1528	b813	1	6.3836665	1.0717402	3.4208145
m1570	b813	1	6.3836665	-1.0052617	-3.208629
m745	b817	1	2.8109412	1.1118057	1.5626074
m828	b818	1	7.067893	1.0586429	3.7411833
m1073	b819	1	3.9653697	1.0069324	1.9964273
m1585	b820	1	4.9057994	0.962856	2.3617938
m135	b821	1	6.652747	1.0431409	3.4698777
m1437	b822	1	12.829925	0.9951845	6.3840714
m1499	b823	1	3.1441565	1.0611796	1.6682582
m20	b826	1	1.8140322	1.2805399	1.1614764
m1145	b828	1	2.432598	1.159524	1.4103234
m1134	b829	1	4.5013604	1.1183598	2.5170712
m1397	b830	1	4.8306856	1.0969198	2.6494372
m252	b832	1	9.38458	1.0547904	4.949379
m655	b834	1	1.7890278	1.0601418	0.94831014
m584	b835	1	4.017879	1.0797346	2.1691203
m333	b836	1	1.9041533	1.1573502	1.1018909
m1319	b837	1	4.276231	1.1253756	2.406182
m462	b838	1	4.550651	1.0609065	2.4139059
m1455	b840	1	2.0585213	1.2473152	1.2838099
m1571	b842	1	2.6929514	1.1633047	1.566357
m1284	b843	1	4.2601147	1.0277323	2.1891308
m1625	b845	1	2.2705178	0.77519375	0.8800469
m237	b848	1	2.5693688	1.0969534	1.4092376
m917	b849	1	5.4803967	0.99823445	2.7353592
m992	b850	1	2.7339113	1.2084669	1.6519241
m424	b851	1	2.8656597	0.9858115	1.4125016
m998	b852	1	4.777655	1.1130586	2.6589043
m201	b854	1	1.4041524	1.0822793	0.75984025
m180	b855	1	8.805317	1.0342946	4.553641
m1392	b856	1	3.1800742	1.1544907	1.8356787
m545	b857	1	2.3625002	1.1920706	1.4081342
m263	b859	1	4.6019144	1.097506	2.525315
m677	b860	1	6.048156	1.0218197	3.0900626
m1416	b864	1	1.856591	1.2709379	1.179811
m302	b865	1	3.2848318	1.0996011	1.8060036
m897	b867	1	4.4111137	1.1235123	2.4779668
m1059	b868	1	3.7002046	1.1434453	2.11549
m5	b870	1	7.685557	1.0173578	3.9094777
m119	b871	1	5.275035	1.0969833	2.8933134
m323	b873	1	5.275899	1.0434875	2.7526653
m1223	b877	1	5.2274213	1.0058726	2.629061
m555	b878	1	4.9890084	1.0715482	2.6729817
m561	b880	1	8.901708	1.0128036	4.5078397
m296	b882	1	13.688631	1.029026	7.04298
m1131	b883	1	4.3920913	1.0717733	2.3536658
m1491	b885	1	5.260799	1.0975839	2.8870418
m419	b886	1	3.2888405	1.0083348	1.6581235
m1470	b888	1	3.5142875	1.0246296	1.8004265
m58	b890	1	5.396458	1.1048115	2.9810328
m133	b895	1	1.6633726	1.1899382	0.98965424
m290	b898	1	4.27041	0.91767997	1.9594371
m977	b899	1	4.808981	0.96476406	2.3197641
m625	b901	1	4.65707	1.0566547	2.4604573
m1611	b902	1	4.2539306	0.8700092	1.8504779
m976	b905	1	2.081663	0.9511833	0.99002486
m952	b907	1	4.118809	1.0706459	2.204891
m272	b909	1	3.8943756	1.138328	2.2165394
m15	b910	1	7.481601	1.0189707	3.8117716
m1486	b911	1	2.1950312	1.1233361	1.2328767
m1478	b912	1	3.7687616	1.086079	2.0465858
m838	b913	1	5.8167696	0.99870896	2.9046302
m411	b915	1	4.597512	1.1286154	2.5944114
m878	b917	1	5.724412	1.1068903	3.1681476
m1443	b918	1	5.960735	1.0316361	3.0746553
m95	b920	1	4.5539465	1.0619583	2.4180546
m777	b923	1	5.0611267	1.0919026	2.7631323
m370	b925	1	5.343676	1.0857283	2.9008904
m1575	b926	1	7.7492075	1.0753459	4.166538
m973	b927	1	9.051451	1.0141629	4.5898237
m1077	b928	1	5.182837	1.0555446	2.735358
m763	b930	1	3.6047602	1.110358	2.0012927
m1078	b931	1	4.671269	1.0853045	2.5348709
m1009	b932	1	4.043959	1.1100692	2.2445362
m266	b937	1	6.215344	1.0326827	3.2092404
m224	b940	1	2.8390682	0.9974131	1.4158641
m1474	b941	1	6.2086086	1.081303	3.3566957
m516	b943	1	2.6757607	1.1625615	1.5553688
m993	b946	1	1.8204815	1.2352409	1.1243677
m48	b948	1	7.568737	1.0811905	4.0916204
m110	b950	1	4.339398	1.0716591	2.325179
m447	b951	1	5.955775	1.1006283	3.2775476
m174	b956	1	1.8394547	0.8570378	0.78823787
m1451	b957	1	4.19146	1.0640845	2.2300339
m162	b959	1	5.514594	1.0242227	2.8240852
m392	b962	1	8.663779	1.0275182	4.451094
m139	b964	1	3.9341905	1.1138759	2.1910994
m46	b965	1	11.186797	1.0558	5.9055057
m196	b967	1	9.07769	1.0390259	4.715979
m1244	b969	1	4.010812	1.1397985	2.2857568
m1581	b970	1	1.9814364	1.1538348	1.1431216
m995	b971	1	4.5427628	1.1450258	2.6007903
m293	b973	1	2.2054315	1.1495861	1.2676691
m184	b975	1	5.3721595	1.0337828	2.7768278
m1287	b976	1	3.5294485	1.0927677	1.9284319
m932	b980	1	5.899745	1.0745765	3.1698618
m1376	b983	1	4.471328	1.1316093	2.5298991
m879	b984	1	4.373724	1.0726005	2.3456259
m1117	b985	1	4.6622634	1.1246858	2.621791
m1296	b987	1	3.4004712	1.147173	1.9504596
m713	b988	1	4.4610415	1.1253544	2.5101266
m529	b989	1	5.989539	1.0785166	3.2299104
m1140	b991	1	3.598423	1.075168	1.9344548
m1054	b992	1	5.804436	1.1009743	3.195268
m321	b995	1	4.410136	1.1150475	2.4587567
m796	b998	1	7.0353737	1.0823958	3.8075325
m961	b999	1	3.4684827	1.0170273	1.7637714
m523	b1004	1	2.4482954	0.83784217	1.0256399
m768	b1005	1	6.881053	1.0554538	3.6313136
m1327	b1006	1	3.912827	1.1434886	2.237138
m1359	b1007	1	5.7442822	1.0574515	3.037148
m1151	b1008	1	8.831906	1.0292125	4.5449176
m670	b1010	1	2.2058332	1.2421942	1.3700387
m1489	b1012	1	3.4750807	1.084991	1.8852187
m1018	b1013	1	6.1597652	1.0697159	3.2945948
m1257	b1014	1	5.540972	1.0534986	2.9187016
m527	b1015	1	3.9195135	1.1088256	2.1730332
m724	b1016	1	1.4833001	1.2864624	0.9541043
m1308	b1017	1	2.0326147	1.1737174	1.1928567
m291	b1019	1	4.3283906	1.0593346	2.2926097
m34	b1020	1	5.418238	1.0415703	2.821736
m962	b1021	1	3.7487328	1.1520369	2.1593404
m719	b1022	1	4.353449	1.099994	2.3943834
m1621	b1025	1	1.5350221	0.73853445	0.5668339
m1460	b1028	1	3.6251745	1.038211	1.8818443
m1364	b1030	1	3.8800833	1.0887761	2.1122725
m391	b1035	1	2.1068132	1.0281018	1.0830088
m1002	b1038	1	4.3094473	1.1035805	2.3779106
m845	b1039	1	2.8621438	1.0983115	1.5717638
m1177	b1042	1	4.2136083	1.1086928	2.335798
m1346	b1045	1	4.080235	1.0880722	2.2197967
m406	b1052	1	2.7121105	1.1671544	1.5827267
m711	b1056	1	3.9314158	1.0933362	2.149181
m122	b1058	1	4.270135	1.0814894	2.3090525
m1551	b1059	1	1.4532509	0.8679104	0.63064474
m668	b1060	1	3.8243895	0.99893695	1.9101614
m1552	b1063	1	3.6044843	1.0593433	1.9091893
m1448	b1064	1	3.9511993	1.0938673	2.161042
m382	b1065	1	13.706094	1.0246508	7.0219784
m1414	b1067	1	1.7081491	0.947381	0.8091347
m1081	b1068	1	3.8904514	1.0768713	2.0947573
m1595	b1070	1	4.02759	1.0856019	2.1861794
m822	b1071	1	2.832036	1.1065749	1.5669222
m526	b1072	1	5.4609523	1.0539902	2.8778973
m475	b1080	1	4.389847	1.1477375	2.519195
m170	b1082	1	8.564233	0.97462445	4.1734543
m716	b1093	1	4.2028646	1.0431374	2.1920824
m1546	b1094	1	7.3521075	1.0689384	3.9294844
m378	b1095	1	4.117326	1.129409	2.3250716
m1321	b1096	1	4.144908	1.0606024	2.1980498
m830	b1097	1	3.0869117	1.1785073	1.818972
m1017	b1098	1	5.141264	1.0741899	2.7613485
m1378	b1100	1	3.9970121	1.0965695	2.1914997
m1539	b1101	1	2.6449347	1.2306204	1.6274526
m761	b1104	1	4.886057	1.1171728	2.7292879
m794	b1109	1	7.1278825	1.0846257	3.8655462
m686	b1111	1	1.503664	1.3153868	0.98894894
m1481	b1116	1	3.2676792	1.0888056	1.7789333
m1586	b1118	1	2.8808527	1.1077085	1.5955683
m645	b1119	1	7.0525928	1.0240096	3.6109607
m1589	b1119	1	7.0525928	-0.96665055	-3.408697
m431	b1120	1	1.9929706	1.0348223	1.0311844
m379	b1122	1	7.6606293	1.0487245	4.016946
m433	b1123	1	8.049022	0.99701995	4.012517
m514	b1127	1	6.972293	1.0158677	3.5414634
m1248	b1130	1	8.573317	-0.98906267	-4.2397733
m1574	b1130	1	8.573317	0.99621105	4.2704167
m216	b1131	1	4.1672707	0.9884516	2.059569
m1213	b1133	1	3.576114	1.1737916	2.098809
m1342	b1135	1	2.4908574	1.142317	1.4226712
m1149	b1136	1	3.783171	1.0391272	1.9655987
m778	b1139	1	4.9362307	1.0094044	2.4913244
m99	b1144	1	6.071852	1.0757141	3.2657888
m1355	b1145	1	4.113006	1.1058356	2.2741528
m246	b1147	1	1.5605153	1.3053937	1.0185431
m1555	b1148	1	1.2683134	1.4408553	0.9137259
m1329	b1149	1	5.715201	1.0760514	3.0749264
m1466	b1152	1	4.5596	1.071278	2.4422991
m1326	b1153	1	3.5419924	1.0710598	1.8968437
m1040	b1155	1	5.68312	1.0774865	3.0617452
m1556	b1156	1	3.1494653	1.0069755	1.585716
m1016	b1158	1	4.9717326	1.099118	2.7322602
m1488	b1159	1	2.622847	1.2173924	1.5965158
m1090	b1160	1	4.7011223	1.0956265	2.5753381
m612	b1163	1	2.1531558	1.2653683	1.3622706
m787	b1171	1	7.869506	1.067403	4.199968
m1035	b1175	1	5.3460603	1.0955052	2.928323
m1344	b1176	1	4.604459	1.0970287	2.5256116
m1494	b1177	1	4.5889955	1.1063081	2.53842
m1340	b1179	1	1.5643123	1.2955117	1.0132911
m1064	b1180	1	4.87565	1.1405777	2.7805285
m484	b1185	1	3.6223142	1.0705168	1.9388753
m965	b1194	1	4.5239377	1.1085006	2.5073886
m1472	b1195	1	4.304878	1.0753769	2.3146815
m1142	b1197	1	3.0929801	1.0837971	1.6760831
m1180	b1198	1	4.5556116	1.1484804	2.6160154
m889	b1202	1	5.875495	1.1184508	3.2857258
m1500	b1203	1	5.209369	0.90923095	2.3682592
m1203	b1204	1	1.6776786	1.1592386	0.9724131
m562	b1206	1	2.1725383	1.2606409	1.3693975
m730	b1207	1	3.3583817	1.1293472	1.8963894
m212	b1208	1	1.7178197	1.022475	0.8782115
m1055	b1209	1	3.340999	1.095448	1.8299444
m1146	b1211	1	5.092606	1.0752033	2.7377903
m274	b1215	1	3.2420902	0.9650078	1.5643246
m1085	b1218	1	3.8431857	1.0471679	2.0122306
m1452	b1224	1	1.2600777	1.0707562	0.6746199
m1490	b1227	1	3.6894662	0.9655795	1.7812358
m1532	b1235	1	3.6919713	1.0158836	1.8753066
m467	b1239	1	6.7747636	1.0723038	3.6323009
m666	b1241	1	7.0785103	1.0657218	3.7718618
m401	b1243	1	4.7349367	1.0663522	2.5245578
m294	b1245	1	3.0634	1.0554073	1.6165653
m128	b1248	1	7.588311	1.0656999	4.0434303
m568	b1249	1	6.8889275	1.0677638	3.6778731
m1275	b1254	1	5.3911405	1.1293533	3.0442514
m1434	b1261	1	3.3893344	1.0996821	1.8635943
m76	b1265	1	5.538562	1.0409777	2.8827608
m267	b1267	1	1.9440793	1.0175012	0.98905057
m389	b1278	1	3.2195408	1.1911544	1.9174821
m1442	b1282	1	2.9699543	1.1613239	1.7245387
m1534	b1284	1	3.2324276	1.1464611	1.8529253
m1349	b1288	1	3.973209	1.1115845	2.2082803
m837	b1289	1	2.929084	1.1472194	1.680152
m1005	b1291	1	3.9515226	1.1207654	2.214365
m367	b1292	1	6.774722	1.0299004	3.4886465
m1265	b1293	1	4.2407656	1.1207924	2.376503
m1306	b1294	1	4.2474747	1.0558836	2.24242
m1587	b1297	1	5.1768847	1.0736854	2.779169
m1305	b1298	1	5.0330753	1.0505306	2.6436992
m1479	b1301	1	6.1199126	0.95098907	2.9099858
m1415	b1305	1	2.937851	1.1405416	1.6753747
m788	b1306	1	3.8422425	1.1153644	2.1427505
m1132	b1307	1	6.552088	1.1048511	3.619539
m1468	b1308	1	5.6534677	1.110119	3.1380098
m525	b1311	1	4.2730646	1.1135213	2.3790734
m978	b1316	1	5.8438077	1.0723689	3.133357
m559	b1319	1	7.073431	1.0767895	3.808299
m1198	b1324	1	4.84717	1.0944108	2.6523972
m698	b1325	1	8.125804	1.0125394	4.1138453
m628	b1327	1	6.300808	1.063016	3.3489304
m1487	b1330	1	3.0060909	1.1063068	1.6628299
m1024	b1333	1	1.6223536	0.9925388	0.80512655
m1221	b1335	1	5.944854	1.0806268	3.2120876
m1613	b1336	1	2.9581957	1.0351288	1.5310577
m1401	b1337	1	2.9632795	1.1183115	1.6569331
m1525	b1341	1	3.9213986	1.1405616	2.2363005
m1260	b1345	1	3.3820646	1.0958724	1.8531513
m1021	b1346	1	4.723355	1.0895988	2.5732775
m790	b1347	1	4.724328	1.0342709	2.4431214
m732	b1351	1	6.746812	1.0860256	3.6636043
m913	b1354	1	2.2144604	1.215053	1.345343
m260	b1356	1	7.389353	1.0364716	3.8294296
m1375	b1360	1	4.7988915	1.110934	2.6656253
m1413	b1361	1	4.170791	1.1360617	2.3691375
m1242	b1365	1	3.7131228	1.11918	2.0778232
m638	b1370	1	5.928845	1.0748714	3.18637
m473	b1371	1	5.473672	1.0534782	2.8831975
m1317	b1375	1	3.844534	1.1197578	2.152482
m684	b1378	1	5.006372	1.1104846	2.7797487
m927	b1379	1	3.1635706	1.0896107	1.7235276
m503	b1382	1	2.22877	0.97349095	1.084846
m485	b1384	1	2.6157022	1.2462016	1.6298462
m813	b1385	1	3.3274825	1.1534945	1.9191141
m1398	b1386	1	4.3838515	1.1302748	2.4774785
m1094	b1388	1	7.2163315	1.0666674	3.8487134
m1243	b1390	1	4.0639577	1.0711194	2.1764958
m1548	b1391	1	3.5232668	1.1221436	1.9768054
m43	b1394	1	2.3174672	1.0317466	1.1955245
m1461	b1397	1	5.5995855	1.0898224	3.0512753
m903	b1398	1	4.5407987	1.0630869	2.4136343
m1391	b1400	1	8.319274	1.0770192	4.480007
m7	b1405	1	2.241047	1.3007767	1.4575479
m1179	b1412	1	6.675096	1.0905914	3.639898
m1380	b1413	1	5.75119	1.0892009	3.132102
m870	b1415	1	4.5667396	1.0770885	2.4593952
m1303	b1417	1	4.4806604	1.1138813	2.4954655
m654	b1418	1	2.225462	0.80429655	0.89495987
m1164	b1420	1	4.227243	1.087089	2.2976956
m1404	b1421	1	3.7694123	1.0668648	2.0107272
m1022	b1422	1	3.7834997	1.1263835	2.1308348
m565	b1423	1	6.6352434	1.0987868	3.6453638
m1139	b1426	1	4.973004	1.0261018	2.551405
m1237	b1427	1	4.187389	1.1024467	2.308187
m27	b1429	1	2.326197	1.1972947	1.3925714
m860	b1430	1	4.202139	1.0800115	2.2691789
m1158	b1431	1	4.0804744	1.1174107	2.2797804
m1410	b1436	1	3.4336967	1.1229075	1.9278558
m1109	b1439	1	5.058492	1.1033934	2.7907567
m616	b1440	1	4.430796	1.0248629	2.2704794
m1512	b1441	1	4.4458055	1.1057818	2.4580464
m1394	b1443	1	11.001487	1.0337306	5.6862807
m839	b1445	1	2.7028356	1.0216769	1.3807147
m764	b1446	1	3.309787	1.0258703	1.6977094
m1070	b1447	1	7.8963523	1.020891	4.030658
m847	b1449	1	3.294223	1.1587721	1.9086243
m1424	b1452	1	4.7308826	1.0990916	2.5998356
m1351	b1453	1	5.1089187	1.0276219	2.62502
m1043	b1458	1	4.7197285	1.0102261	2.3839939
m265	b1459	1	2.0614846	1.024578	1.0560744
m729	b1462	1	1.5412216	1.2598355	0.97084385
m825	b1463	1	3.0520244	1.0225787	1.5604675
m1196	b1464	1	3.5646448	1.1687216	2.0830421
m985	b1465	1	4.3093867	1.0818677	2.3311343
m1535	b1467	1	3.2336192	1.0960726	1.7721415
m1302	b1472	1	3.6565137	1.123567	2.0541735
m736	b1475	1	6.509693	1.0387586	3.3809998
m1270	b1476	1	6.6639132	1.0683299	3.5596254
m1566	b1477	1	4.842544	1.1379287	2.7552373
m275	b1478	1	2.7123187	0.9172268	1.243905
m1423	b1479	1	3.8890924	1.0827196	2.1053984
m1350	b1482	1	5.7167206	1.0694464	3.056865
m423	b1483	1	4.11619	1.04756	2.1559823
m1400	b1484	1	4.203608	1.1357095	2.3870392
m206	b1488	1	3.7557335	1.0993248	2.064385
m1264	b1493	1	5.8578925	1.079425	3.1615756
m1120	b1494	1	4.342344	1.0736078	2.331
m83	b1496	1	4.5941186	1.0469805	2.404976
m901	b1497	1	6.1319566	1.0512094	3.2229817
m421	b1499	1	6.8595862	1.0574948	3.6269906
m1440	b1501	1	2.6784139	1.177081	1.5763539
m1374	b1503	1	5.7933	1.0744892	3.1124237
m417	b1504	1	8.540939	0.99050087	4.2299075
m1345	b1506	1	4.535911	1.0472469	2.3751113
m1553	b1508	1	6.2047815	1.0484865	3.2528164
m820	b1509	1	4.263529	1.1397651	2.4297092
m855	b1516	1	1.7949538	1.1634403	1.044164
m767	b1517	1	5.2255063	1.0967386	2.8655076
m497	b1518	1	6.0444255	1.0344437	3.1263068
m926	b1523	1	4.3211055	1.0554783	2.2804167
m500	b1526	1	6.2667465	1.0290155	3.2242901
m1623	b1535	1	3.0641184	1.1575469	1.773428
m1216	b1536	1	4.358753	0.91783196	2.000283
m1102	b1538	1	5.1585107	1.0684489	2.755804
m1080	b1542	1	4.0520854	1.0590817	2.145744
m843	b1544	1	2.8279793	1.220962	1.7263817
m964	b1546	1	2.4111576	1.2487755	1.5054923
m1579	b1547	1	4.1211047	1.1553681	2.380695
m1204	b1548	1	1.8743398	1.2462612	1.1679527
m1233	b1550	1	4.7199492	1.0947989	2.5836983
m1037	b1551	1	5.6426654	1.0380518	2.9286883
m1170	b1552	1	2.0425813	1.2760729	1.3032401
m189	b1555	1	5.664155	1.0624045	3.0088162
m750	b1556	1	3.613204	1.0972359	1.9822673
m1101	b1558	1	3.702819	1.145809	2.1213627
m916	b1561	1	6.32653	1.0744535	3.398777
m303	b1564	1	6.7533655	1.0441244	3.525674
m936	b1565	1	8.259343	1.0548133	4.356034
m1133	b1569	1	5.929431	1.0718074	3.1776037
m1121	b1572	1	3.7516122	1.1016804	2.0665379
m1128	b1573	1	3.0691586	1.1962574	1.8357517
m1363	b1575	1	2.4888766	1.1649156	1.4496709
m955	b1578	1	3.563165	1.0552588	1.8800305
m1259	b1580	1	3.963464	0.9966343	1.9750644
m1098	b1586	1	2.7050025	1.0800707	1.4607958
m452	b1592	1	4.7203827	1.0296539	2.430184
m893	b1593	1	5.74461	0.9398274	2.69947
m1628	b1594	1	1.1920881	0.9721396	0.57943714
m1041	b1595	1	4.2369246	1.0525663	2.2298234
m728	b1598	1	3.334571	1.1696157	1.9500839
m96	b1603	1	5.446247	0.9575759	2.6076012
m1152	b1604	1	1.5479772	1.0524049	0.8145526
m636	b1606	1	2.2235672	1.2170376	1.3530815
m776	b1607	1	7.3699346	1.0551534	3.8882039
m1181	b1611	1	4.766852	1.0743575	2.5606475
m865	b1612	1	2.4295764	1.2291137	1.4931085
m1407	b1617	1	3.3053195	1.1852833	1.9588667
m547	b1618	1	7.665402	1.0446773	4.003935
m644	b1621	1	2.0180318	1.111565	1.1215867
m204	b1624	1	1.2953049	1.3709972	0.88793117
m957	b1624	1	1.2953049	-0.9587482	-0.62093455
m737	b1627	1	5.5536394	1.0318226	2.8651853
m571	b1632	1	6.7312217	1.0647473	3.5835266
m587	b1636	1	7.971649	1.0318121	4.1126246
m793	b1646	1	3.823657	1.1312168	2.1626914
m1010	b1647	1	3.6761236	1.1169086	2.0529451
m832	b1648	1	4.4537263	1.034204	2.3030298
m1549	b1649	1	4.0615897	0.953485	1.9363347
m91	b1655	1	3.1785872	1.0504079	1.6694072
m1153	b1659	1	3.5772846	1.0306318	1.8434321
m239	b1664	1	3.5691946	1.0806109	1.9284582
m1263	b1666	1	5.3777847	1.0571468	2.8425539
m458	b1668	1	4.5509386	1.0077876	2.2931848
m722	b1669	1	8.762998	1.0183135	4.4617405
m1114	b1690	1	4.7193594	1.0473307	2.4713657
m1186	b1697	1	2.8600645	1.1115388	1.5895346
m683	b1702	1	10.848951	1.0587264	5.7430353
m1202	b1704	1	7.4677777	1.0607444	3.9607046
m463	b1707	1	4.002652	1.0204588	2.042271
m704	b1708	1	3.809034	1.1004182	2.0957677
m1206	b1711	1	3.226366	1.0970453	1.7697338
m798	b1715	1	6.713486	1.0134196	3.4017913
m1188	b1717	1	4.3986683	1.0859498	2.3883665
m408	b1722	1	1.4408051	1.3669693	0.9847696
m1231	b1726	1	3.3074248	1.0663009	1.7633536
m647	b1728	1	7.609409	1.0094913	3.8408155
m1353	b1730	1	4.1934366	1.1009129	2.3083045
m1393	b1731	1	2.0686781	1.0871822	1.1245092
m446	b1736	1	3.5136714	1.113265	1.9558258
m1205	b1737	1	2.4981196	1.094317	1.3668715
m1382	b1742	1	5.5159326	1.0618316	2.9284902
m1075	b1743	1	14.924986	1.0216131	7.6237817
m621	b1746	1	9.768685	1.027851	5.020375
m1465	b1749	1	3.189255	1.0895829	1.7374834
m928	b1750	1	2.1159155	1.0467544	1.1074255
m987	b1758	1	4.925365	1.0622174	2.6159031
m1049	b1759	1	5.8359423	1.035808	3.02246
m1429	b1761	1	5.9096966	1.0605024	3.1336226
m862	b1762	1	5.179417	1.0795279	2.7956605
m639	b1763	1	10.795044	-1.0424492	-5.626641
m1266	b1763	1	10.795044	1.0170114	5.489342
m1336	b1769	1	2.0935416	0.8800749	0.9212374
m885	b1771	1	4.4508505	1.0328692	2.298568
m1067	b1773	1	3.5197346	1.0279696	1.8090851
m1045	b1778	1	4.151807	0.99765176	2.0710306
m1395	b1779	1	5.201982	1.1294235	2.9376173
m478	b1781	1	6.729931	1.0420952	3.5066137
m1381	b1784	1	1.5093704	1.1136434	0.8404498
m87	b1785	1	8.012321	1.0401255	4.1669135
m1229	b1789	1	1.8263978	1.1591884	1.0585706
m1166	b1790	1	5.074737	1.0478458	2.6587763
m759	b1791	1	4.5922604	1.0864483	2.4946268
m117	b1794	1	1.5942241	1.1270353	0.89837354
m416	b1798	1	5.111253	1.0532992	2.6918344
m1502	b1800	1	3.513664	1.0633214	1.868077
m1020	b1801	1	3.3214452	1.1672597	1.9384967
m1315	b1802	1	6.854369	1.0863153	3.7230048
m975	b1803	1	4.0602493	1.1383945	2.3110816
m775	b1806	1	4.0816393	1.1280476	2.3021414
m678	b1808	1	5.841602	0.9847631	2.8763006
m1509	b1810	1	3.8533506	1.1438183	2.2037675
m1403	b1811	1	3.0718327	1.0670977	1.6389716
m1217	b1812	1	5.175055	1.0610119	2.7453976
m1520	b1813	1	4.4885416	1.0257757	2.3021219
m1100	b1818	1	1.4052407	1.1278284	0.79243326
m1565	b1824	1	4.364145	1.0766982	2.349434
m366	b1826	1	3.932079	1.0953451	2.1534896
m898	b1827	1	6.253847	1.080681	3.3792098
m1189	b1829	1	4.2914114	1.0862406	2.3307545
m1307	b1830	1	5.4465194	1.0871426	2.9605722
m1267	b1835	1	3.462064	1.0490571	1.8159469
m631	b1838	1	8.0390835	1.043279	4.1935053
m791	b1840	1	6.480562	1.0845124	3.5141277
m1406	b1844	1	4.1425304	1.0519524	2.1788738
m1524	b1846	1	3.308679	1.1725814	1.939845
m1086	b1847	1	4.6014695	1.0842234	2.4945097
m1289	b1850	1	2.604758	1.203179	1.5669959
m460	b1852	1	2.9494476	1.078054	1.5898296
m388	b1858	1	3.200739	1.1176865	1.7887123
m604	b1860	1	5.478401	1.0762616	2.9480968
m136	b1864	1	5.027426	0.95642716	2.4041872
m944	b1867	1	7.180888	1.018313	3.656201
m1418	b1868	1	3.3153725	1.1008345	1.8248414
m1484	b1870	1	5.095801	1.0350946	2.6373167
m914	b1873	1	6.035399	1.0339708	3.1202133
m881	b1874	1	4.078002	1.1507388	2.3463554
m949	b1876	1	3.6013248	0.99698603	1.7952331
m1051	b1879	1	2.5286593	1.028128	1.2998934
m1062	b1880	1	4.56096	1.0614014	2.4205039
m363	b1881	1	5.6341624	1.111248	3.130474
m1215	b1883	1	8.080907	1.0435911	4.2165833
m1283	b1887	1	2.2652752	1.1361322	1.2868226
m649	b1891	1	3.3170025	0.9666029	1.6031097
m1236	b1893	1	6.6102824	1.0507042	3.4727263
m1426	b1894	1	1.3127077	1.3632551	0.89477503
m1372	b1899	1	4.0051713	1.0758615	2.1545053
m1208	b1901	1	4.208995	0.9902474	2.0839756
m1360	b1902	1	2.9540675	1.0245415	1.5132806
m607	b1904	1	4.311348	0.8556508	1.844505
m760	b1906	1	4.262077	1.1071715	2.3594253
m963	b1907	1	1.8011595	1.1260873	1.0141286
m1096	b1908	1	1.6201879	1.1946931	0.96781784
m784	b1910	1	1.4704189	1.0414633	0.76569635
m1225	b1913	1	1.5485567	1.3582143	1.0516359
m1290	b1914	1	3.0962703	1.0783346	1.6694094
m1358	b1920	1	4.3388352	1.0847445	2.3532643
m1354	b1925	1	4.4113173	1.1105775	2.449554
m937	b1928	1	7.0957294	1.007833	3.575656
m943	b1929	1	4.970936	1.0809696	2.6867135
m1459	b1933	1	4.022978	1.0378424	2.087608
m1357	b1934	1	4.1930056	1.022863	2.1444366
m1396	b1935	1	3.097879	1.0602254	1.6422237
m1580	b1936	1	3.8236346	1.1499358	2.198467
m1184	b1940	1	8.051196	1.0080062	4.057827
m295	b1941	1	4.989318	1.0582296	2.6399217
m1295	b1943	1	3.500576	1.052467	1.8421203
m1366	b1947	1	3.393448	1.1104387	1.884109
m1084	b1949	1	5.965943	1.0546622	3.146023
m1473	b1951	1	3.818068	1.1273501	2.1521535
m1371	b1954	1	4.6981344	1.1104538	2.608531
m1352	b1956	1	1.5148216	0.791444	0.5994471
m723	b1957	1	3.8916588	0.9826187	1.9120078
m738	b1957	1	3.8916588	-1.0508618	-2.0447984
m888	b1959	1	7.4541707	1.0594641	3.9487212
m1312	b1961	1	1.9796829	1.112171	1.1008731
m989	b1968	1	6.1615634	1.0458202	3.2219434
m1508	b1975	1	4.2516913	1.0726197	2.2802238
m304	b1977	1	2.5493834	1.1549759	1.4722339
m1335	b1978	1	5.2405343	1.085304	2.8437877
m1362	b1983	1	2.324212	1.1687689	1.3582323
m1467	b1985	1	4.6263843	1.09086	2.5233665
m1169	b1986	1	1.9044758	1.08175	1.0300827
m1369	b1989	1	5.364853	1.0916338	2.928228
m1541	b1992	1	4.6664886	1.065203	2.485379
m1554	b1997	1	3.9056206	1.1373655	2.2210574
m896	b1999	1	1.872995	1.1409231	1.0684696
m1246	b2009	1	3.7177505	1.0842894	2.0155551
m1310	b2011	1	3.341405	0.9998509	1.6704525
m1318	b2015	1	5.186206	1.0487168	2.7194307
m1412	b2017	1	1.7131346	1.0762465	0.9218787
m679	b2018	1	6.1858335	1.0845119	3.3543022
m1219	b2022	1	5.556019	1.0909501	3.030667
m1112	b2023	1	4.4351206	1.0386746	2.3033237
m1483	b2028	1	1.2766354	0.7436632	0.47469398
m57	b2075	1	4.658703	1.0328289	2.405821
m17	b2076	1	1.9101487	1.200314	1.1463895
m284	b2095	1	5.544352	1.1113646	3.0808983
m564	b2096	1	5.7129207	1.0508343	3.001668
m669	b2098	1	5.8450694	1.0372943	3.0315273
m1475	b2099	1	2.6588473	1.1508393	1.5299529
m221	b2107	1	8.799405	1.0198556	4.4870605
m282	b2108	1	4.447964	1.1130801	2.47547
m113	b2113	1	8.21225	1.0248531	4.2081723
m665	b2128	1	5.9292083	1.0475563	3.1055915
m930	b2135	1	3.9545777	1.1300997	2.2345307
m610	b2136	1	8.689222	1.0593263	4.6023593
m149	b2144	1	5.8670325	1.0091833	2.9604597
m510	b2147	1	4.650351	1.0613775	2.4678895
m376	b2155	1	12.8400345	1.0307934	6.6177115
m168	b2156	1	7.868499	1.0547601	4.149687
m1519	b2159	1	2.9322906	1.118688	1.6401596
m1001	b2160	1	4.9778576	1.0822169	2.6935606
m1115	b2192	1	7.3962946	1.0504564	3.884742
m264	b2215	1	6.002805	1.02096	3.0643113
m1161	b2222	1	3.2488248	1.1480871	1.8649634
m512	b2223	1	1.8474886	1.1260822	1.0402099
