# Supplementary material for: Misic, a general deep learning-based method for the high-throughput cell segmentation of complex bacterial communities
Source: eLife. 2021 Sep 9;10:e65151. doi: 10.7554/eLife.65151 (PMC8478410; doi:10.7554/eLife.65151)
Supplement: Figure 4—source data 2. [file elife-65151-fig4-data2.csv]

NAME	ASSOCIATION	EXPERIMENT	IMAGE	INTENSITY	MAXIMA	MEDIAL	POSITION	SHAPE	SHAPE.solidity	length
b5	0	Experiment 14	Stack_col_14_15.tif	236.51282	0	1	1	1	0.92221296	18.983383
b6	0	Experiment 14	Stack_col_14_15.tif	242.32727	0	1	1	1	0.7704197	27.19635
b7	0	Experiment 14	Stack_col_14_15.tif	246.64865	0	1	1	1	0.851837	33.481968
b8	0	Experiment 14	Stack_col_14_15.tif	243.82455	0	1	1	1	0.8605277	24.777924
b9	0	Experiment 14	Stack_col_14_15.tif	232.59459	0	1	1	1	0.92086405	14.970776
b10	0	Experiment 14	Stack_col_14_15.tif	242.05435	1	1	1	1	0.6464546	44.693577
b11	0	Experiment 14	Stack_col_14_15.tif	240.38298	0	1	1	1	0.58085716	42.165432
b12	0	Experiment 14	Stack_col_14_15.tif	239.56522	0	1	1	1	0.6925857	42.53741
b13	0	Experiment 14	Stack_col_14_15.tif	240.2653	0	1	1	1	0.93874836	21.963497
b14	0	Experiment 14	Stack_col_14_15.tif	241.66667	1	1	1	1	0.54162407	27.80129
b15	0	Experiment 14	Stack_col_14_15.tif	237.97058	1	1	1	1	0.40078256	32.483795
b16	0	Experiment 14	Stack_col_14_15.tif	243.02	0	1	1	1	0.8361043	22.580988
b17	0	Experiment 14	Stack_col_14_15.tif	238.85417	0	1	1	1	0.7358549	19.898632
b18	0	Experiment 14	Stack_col_14_15.tif	242.35294	0	1	1	1	0.88264775	17.219809
b19	0	Experiment 14	Stack_col_14_15.tif	241.87755	0	1	1	1	0.91905975	20.85114
b20	0	Experiment 14	Stack_col_14_15.tif	240.41667	0	1	1	1	0.95898366	15.68285
b21	0	Experiment 14	Stack_col_14_15.tif	243.26967	1	1	1	1	0.6275467	38.858574
b22	0	Experiment 14	Stack_col_14_15.tif	242.44	1	1	1	1	0.51883596	38.008236
b23	0	Experiment 14	Stack_col_14_15.tif	243.71053	0	1	1	1	0.65870476	34.58324
b24	0	Experiment 14	Stack_col_14_15.tif	240.2745	0	1	1	1	0.8204917	24.245764
b25	0	Experiment 14	Stack_col_14_15.tif	243.5246	0	1	1	1	0.9436555	26.648561
b26	0	Experiment 14	Stack_col_14_15.tif	244.40909	0	1	1	1	0.8991243	19.01102
b27	0	Experiment 14	Stack_col_14_15.tif	239.23215	0	1	1	1	0.84144866	24.848036
b28	0	Experiment 14	Stack_col_14_15.tif	242.53334	0	1	1	1	0.7522897	32.680473
b29	0	Experiment 14	Stack_col_14_15.tif	237.93939	0	1	1	1	0.9160849	16.281816
b30	0	Experiment 14	Stack_col_14_15.tif	240.59459	1	1	1	1	0.892595	34.590977
b31	0	Experiment 14	Stack_col_14_15.tif	238.47058	0	1	1	1	0.66771597	20.462387
b32	0	Experiment 14	Stack_col_14_15.tif	240.94565	0	1	1	1	0.47446868	42.246353
b33	0	Experiment 14	Stack_col_14_15.tif	240.2	1	1	1	1	0.7004231	47.106247
b34	0	Experiment 14	Stack_col_14_15.tif	239.69014	1	1	1	1	0.4770229	36.561916
b35	0	Experiment 14	Stack_col_14_15.tif	243.51724	0	1	1	1	0.9732685	11.512282
b36	0	Experiment 14	Stack_col_14_15.tif	243.525	0	1	1	1	0.8329511	18.291634
b37	0	Experiment 14	Stack_col_14_15.tif	241.40741	0	1	1	1	0.93197495	16.051657
b38	0	Experiment 14	Stack_col_14_15.tif	241.02083	0	1	1	1	0.9676787	21.03291
b39	0	Experiment 14	Stack_col_14_15.tif	241.61539	0	1	1	1	0.8453341	14.152327
b40	0	Experiment 14	Stack_col_14_15.tif	231.58333	0	1	1	1	0.80781835	25.319279
b41	0	Experiment 14	Stack_col_14_15.tif	242.26154	0	1	1	1	0.87097853	30.024271
b42	0	Experiment 14	Stack_col_14_15.tif	241.79591	0	1	1	1	0.82989067	22.788368
b43	0	Experiment 14	Stack_col_14_15.tif	242.22223	0	1	1	1	0.75028074	19.886269
b44	0	Experiment 14	Stack_col_14_15.tif	242.67567	0	1	1	1	0.95919335	14.9741955
b45	0	Experiment 14	Stack_col_14_15.tif	239.6628	1	1	1	1	0.45431173	40.34878
b46	0	Experiment 14	Stack_col_14_15.tif	242.53659	0	1	1	1	0.81188995	19.40603
b47	0	Experiment 14	Stack_col_14_15.tif	242.9798	1	1	1	1	0.51098794	43.897526
b48	0	Experiment 14	Stack_col_14_15.tif	243.98334	1	1	1	1	0.86855096	25.608374
b49	0	Experiment 14	Stack_col_14_15.tif	245.4	0	1	1	1	0.8559322	22.12883
b50	0	Experiment 14	Stack_col_14_15.tif	242.0	0	1	1	1	0.7663742	33.717655
b51	0	Experiment 14	Stack_col_14_15.tif	241.98387	1	1	1	1	0.42112383	33.646576
b52	0	Experiment 14	Stack_col_14_15.tif	227.49315	1	1	1	1	0.5434462	42.15068
b53	0	Experiment 14	Stack_col_14_15.tif	243.03798	1	1	1	1	0.538186	36.82532
b54	0	Experiment 14	Stack_col_14_15.tif	242.04167	0	1	1	1	0.9107722	25.29672
b55	0	Experiment 14	Stack_col_14_15.tif	240.90741	1	1	1	1	0.8868739	21.854546
b56	0	Experiment 14	Stack_col_14_15.tif	241.8	0	1	1	1	0.8104665	22.291685
b57	0	Experiment 14	Stack_col_14_15.tif	242.87778	1	1	1	1	0.90096366	41.509605
b58	0	Experiment 14	Stack_col_14_15.tif	239.1129	0	1	1	1	0.8873958	28.052197
b59	0	Experiment 14	Stack_col_14_15.tif	233.94667	1	1	1	1	0.7971831	31.751255
b60	0	Experiment 14	Stack_col_14_15.tif	239.71739	0	1	1	1	0.9426626	20.790354
b61	0	Experiment 14	Stack_col_14_15.tif	236.85883	1	1	1	1	0.51510346	38.803905
b62	0	Experiment 14	Stack_col_14_15.tif	236.53334	0	1	1	1	0.9349631	19.84892
b63	0	Experiment 14	Stack_col_14_15.tif	233.83333	1	1	1	1	0.7846783	38.900604
b64	0	Experiment 14	Stack_col_14_15.tif	242.54716	0	1	1	1	0.8190858	26.148476
b65	0	Experiment 14	Stack_col_14_15.tif	242.65672	1	1	1	1	0.66172796	32.58065
b66	0	Experiment 14	Stack_col_14_15.tif	244.45946	0	1	1	1	0.88905454	15.788895
b67	0	Experiment 14	Stack_col_14_15.tif	242.63414	0	1	1	1	0.7675033	19.08778
b68	0	Experiment 14	Stack_col_14_15.tif	241.90741	0	1	1	1	0.7032311	23.085133
b69	0	Experiment 14	Stack_col_14_15.tif	241.3579	1	1	1	1	0.34682047	45.152573
b70	0	Experiment 14	Stack_col_14_15.tif	244.95	0	1	1	1	0.80609995	26.34662
b71	0	Experiment 14	Stack_col_14_15.tif	243.7541	0	1	1	1	0.9421384	27.521746
b72	0	Experiment 14	Stack_col_14_15.tif	240.06383	0	1	1	1	0.94647837	20.166801
b73	0	Experiment 14	Stack_col_14_15.tif	242.17778	0	1	1	1	0.5366715	23.04741
b74	0	Experiment 14	Stack_col_14_15.tif	243.24562	0	1	1	1	0.74222124	30.112686
b75	0	Experiment 14	Stack_col_14_15.tif	239.86441	0	1	1	1	0.8472214	28.437208
b76	0	Experiment 14	Stack_col_14_15.tif	239.99115	1	1	1	1	0.5540594	57.893494
b77	0	Experiment 14	Stack_col_14_15.tif	239.05405	0	1	1	1	0.6335835	35.8089
b78	0	Experiment 14	Stack_col_14_15.tif	240.63266	0	1	1	1	0.9786564	20.775646
b79	0	Experiment 14	Stack_col_14_15.tif	240.73914	0	1	1	1	0.7319705	26.140465
b80	0	Experiment 14	Stack_col_14_15.tif	243.7255	0	1	1	1	0.7255068	23.164799
b81	0	Experiment 14	Stack_col_14_15.tif	242.38461	1	1	1	1	0.7846179	34.232693
b82	0	Experiment 14	Stack_col_14_15.tif	241.0196	0	1	1	1	0.8319209	23.195866
b83	0	Experiment 14	Stack_col_14_15.tif	239.36111	0	1	1	1	0.96327543	16.196959
b84	0	Experiment 14	Stack_col_14_15.tif	242.61905	0	1	1	1	0.8001302	19.892076
b85	0	Experiment 14	Stack_col_14_15.tif	243.04347	0	1	1	1	0.6324165	43.503082
b86	0	Experiment 14	Stack_col_14_15.tif	242.14285	0	1	1	1	0.96484375	15.593489
b87	0	Experiment 14	Stack_col_14_15.tif	240.73134	0	1	1	1	0.8417465	29.579002
b88	0	Experiment 14	Stack_col_14_15.tif	241.7234	0	1	1	1	0.81126803	21.79617
b89	0	Experiment 14	Stack_col_14_15.tif	241.66667	0	1	1	1	0.89132553	15.677923
b90	0	Experiment 14	Stack_col_14_15.tif	236.98077	0	1	1	1	0.743101	24.462006
b91	0	Experiment 14	Stack_col_14_15.tif	243.13559	0	1	1	1	0.79308796	25.49255
b92	0	Experiment 14	Stack_col_14_15.tif	242.9178	0	1	1	1	0.8081368	32.22816
b93	0	Experiment 14	Stack_col_14_15.tif	243.19643	0	1	1	1	0.87629426	22.834545
b94	0	Experiment 14	Stack_col_14_15.tif	242.11765	0	1	1	1	0.79295653	26.088976
b95	0	Experiment 14	Stack_col_14_15.tif	242.33824	0	1	1	1	0.72180307	29.559353
b96	0	Experiment 14	Stack_col_14_15.tif	242.44067	0	1	1	1	0.64310956	32.605923
b97	0	Experiment 14	Stack_col_14_15.tif	241.1	0	1	1	1	0.609235	28.883608
b98	0	Experiment 14	Stack_col_14_15.tif	241.0	0	1	1	1	0.39831296	39.50314
b99	0	Experiment 14	Stack_col_14_15.tif	231.19672	1	1	1	1	0.58590204	27.581062
b100	0	Experiment 14	Stack_col_14_15.tif	241.85106	0	1	1	1	0.94583035	21.195839
b101	0	Experiment 14	Stack_col_14_15.tif	243.76086	0	1	1	1	0.83768547	21.622929
b102	0	Experiment 14	Stack_col_14_15.tif	241.37878	1	1	1	1	0.85050416	34.39113
b103	0	Experiment 14	Stack_col_14_15.tif	238.11765	0	1	1	1	0.7891037	16.446287
b104	0	Experiment 14	Stack_col_14_15.tif	243.2317	1	1	1	1	0.73193747	39.92596
b105	0	Experiment 14	Stack_col_14_15.tif	239.64865	0	1	1	1	0.9674235	15.725335
b106	0	Experiment 14	Stack_col_14_15.tif	237.82191	0	1	1	1	0.5087506	32.786404
b107	0	Experiment 14	Stack_col_14_15.tif	240.075	0	1	1	1	0.7700429	19.228996
b108	0	Experiment 14	Stack_col_14_15.tif	242.97826	0	1	1	1	0.779879	43.185883
b109	0	Experiment 14	Stack_col_14_15.tif	238.06	0	1	1	1	0.76481336	23.422604
b110	0	Experiment 14	Stack_col_14_15.tif	240.37254	0	1	1	1	0.71311474	23.768845
b111	0	Experiment 14	Stack_col_14_15.tif	244.0625	0	1	1	1	0.96105194	21.684677
b112	0	Experiment 14	Stack_col_14_15.tif	243.875	0	1	1	1	0.80122906	25.15096
b113	0	Experiment 14	Stack_col_14_15.tif	239.17545	0	1	1	1	0.81886303	23.33818
b114	0	Experiment 14	Stack_col_14_15.tif	243.68889	0	1	1	1	0.75972927	19.43529
b115	0	Experiment 14	Stack_col_14_15.tif	242.4507	0	1	1	1	0.6746549	32.733448
b116	0	Experiment 14	Stack_col_14_15.tif	240.51389	1	1	1	1	0.81751686	32.42267
b117	0	Experiment 14	Stack_col_14_15.tif	240.78572	0	1	1	1	0.8734015	15.120035
b118	0	Experiment 14	Stack_col_14_15.tif	241.86792	0	1	1	1	0.7332524	23.123154
b119	0	Experiment 14	Stack_col_14_15.tif	244.44681	0	1	1	1	0.83353513	22.76708
b120	0	Experiment 14	Stack_col_14_15.tif	245.76	0	1	1	1	0.8437143	21.559763
b121	0	Experiment 14	Stack_col_14_15.tif	242.68518	0	1	1	1	0.6982906	27.312096
b122	0	Experiment 14	Stack_col_14_15.tif	241.25926	0	1	1	1	0.91950464	14.216704
b123	0	Experiment 14	Stack_col_14_15.tif	240.98245	0	1	1	1	0.7361991	29.229265
b124	0	Experiment 14	Stack_col_14_15.tif	241.57692	0	1	1	1	0.81823117	22.157745
b125	0	Experiment 14	Stack_col_14_15.tif	241.93651	1	1	1	1	0.71202415	28.92006
b126	0	Experiment 14	Stack_col_14_15.tif	241.48334	0	1	1	1	0.84749764	27.973166
b127	0	Experiment 14	Stack_col_14_15.tif	240.31708	0	1	1	1	0.7516046	18.571651
b128	0	Experiment 14	Stack_col_14_15.tif	242.86363	0	1	1	1	0.8493208	31.124025
b129	0	Experiment 14	Stack_col_14_15.tif	233.5	0	1	1	1	0.6463993	25.262981
b130	0	Experiment 14	Stack_col_14_15.tif	241.25807	0	1	1	1	0.7673735	28.06491
b131	0	Experiment 14	Stack_col_14_15.tif	238.68292	1	1	1	1	0.6122821	34.96049
b132	0	Experiment 14	Stack_col_14_15.tif	233.65	0	1	1	1	0.8837031	26.030508
b133	0	Experiment 14	Stack_col_14_15.tif	233.04878	0	1	1	1	0.9246129	17.255863
b134	0	Experiment 14	Stack_col_14_15.tif	241.70493	0	1	1	1	0.7821313	27.228569
b135	0	Experiment 14	Stack_col_14_15.tif	236.48572	0	1	1	1	0.6080845	35.458088
b136	0	Experiment 14	Stack_col_14_15.tif	235.37038	0	1	1	1	0.7659091	14.881176
b137	0	Experiment 14	Stack_col_14_15.tif	242.46153	0	1	1	1	0.5387734	46.963253
b138	0	Experiment 14	Stack_col_14_15.tif	243.66154	0	1	1	1	0.74577516	30.818668
b139	0	Experiment 14	Stack_col_14_15.tif	243.78723	1	1	1	1	0.8457684	31.445627
b140	0	Experiment 14	Stack_col_14_15.tif	239.12727	0	1	1	1	0.9069899	25.592133
b141	0	Experiment 14	Stack_col_14_15.tif	235.58064	0	1	1	1	0.8812121	27.475863
b142	0	Experiment 14	Stack_col_14_15.tif	239.82608	0	1	1	1	0.85574883	33.43501
b143	0	Experiment 14	Stack_col_14_15.tif	241.5303	1	1	1	1	0.70759404	30.889952
b144	0	Experiment 14	Stack_col_14_15.tif	242.56667	0	1	1	1	0.9898689	13.4059515
b145	0	Experiment 14	Stack_col_14_15.tif	236.39215	0	1	1	1	0.84351027	24.455055
b146	0	Experiment 14	Stack_col_14_15.tif	244.8875	0	1	1	1	0.8140881	36.001827
b147	0	Experiment 14	Stack_col_14_15.tif	248.88	0	1	1	1	0.99706745	10.2341175
b148	0	Experiment 14	Stack_col_14_15.tif	239.22223	0	1	1	1	0.840629	18.395945
b149	0	Experiment 14	Stack_col_14_15.tif	242.0633	0	1	1	1	0.7294759	35.30849
b150	0	Experiment 14	Stack_col_14_15.tif	243.42372	0	1	1	1	0.77313626	27.156036
b151	0	Experiment 14	Stack_col_14_15.tif	240.83562	1	1	1	1	0.7325699	34.170383
b152	0	Experiment 14	Stack_col_14_15.tif	241.7027	0	1	1	1	0.8776916	19.982344
b153	0	Experiment 14	Stack_col_14_15.tif	243.76056	0	1	1	1	0.66869825	31.91945
b154	0	Experiment 14	Stack_col_14_15.tif	240.32143	0	1	1	1	0.8822023	11.350583
b155	0	Experiment 14	Stack_col_14_15.tif	241.54	0	1	1	1	0.49001816	44.738358
b156	0	Experiment 14	Stack_col_14_15.tif	240.48889	0	1	1	1	0.8429337	19.55853
b157	0	Experiment 14	Stack_col_14_15.tif	240.89854	1	1	1	1	0.5665681	63.991734
b158	0	Experiment 14	Stack_col_14_15.tif	244.51923	0	1	1	1	0.84281844	23.1265
b159	0	Experiment 14	Stack_col_14_15.tif	238.45833	0	1	1	1	0.8638205	22.145021
b160	0	Experiment 14	Stack_col_14_15.tif	233.17647	0	1	1	1	0.99101126	13.7603445
b161	0	Experiment 14	Stack_col_14_15.tif	241.85417	0	1	1	1	0.9232639	20.018751
b162	0	Experiment 14	Stack_col_14_15.tif	245.77777	0	1	1	1	0.94527364	11.350145
b163	0	Experiment 14	Stack_col_14_15.tif	243.22223	0	1	1	1	0.91351354	14.888121
b164	0	Experiment 14	Stack_col_14_15.tif	243.06451	0	1	1	1	0.9152634	13.165713
b165	0	Experiment 14	Stack_col_14_15.tif	239.24138	0	1	1	1	0.97527814	12.102894
b166	0	Experiment 14	Stack_col_14_15.tif	242.56757	0	1	1	1	0.96384394	16.22668
b167	0	Experiment 14	Stack_col_14_15.tif	239.36667	0	1	1	1	0.9138322	13.3163185
b168	0	Experiment 14	Stack_col_14_15.tif	244.37254	0	1	1	1	0.7458058	22.41088
b169	0	Experiment 14	Stack_col_14_15.tif	244.13115	0	1	1	1	0.83758265	26.990559
b170	0	Experiment 14	Stack_col_14_15.tif	243.34146	0	1	1	1	0.96921796	16.988094
b171	0	Experiment 14	Stack_col_14_15.tif	243.08571	1	1	1	1	0.5568469	39.978054
b172	0	Experiment 14	Stack_col_14_15.tif	243.71428	0	1	1	1	0.9237537	18.82998
b173	0	Experiment 14	Stack_col_14_15.tif	244.2619	0	1	1	1	0.838843	18.470396
b174	0	Experiment 14	Stack_col_14_15.tif	244.22641	0	1	1	1	0.74847376	29.326744
b175	0	Experiment 14	Stack_col_14_15.tif	242.61363	0	1	1	1	0.93736017	19.63366
b176	0	Experiment 14	Stack_col_14_15.tif	241.18391	0	1	1	1	0.779082	41.980457
b177	0	Experiment 14	Stack_col_14_15.tif	241.11111	0	1	1	1	0.87948877	31.318525
b178	0	Experiment 14	Stack_col_14_15.tif	241.11765	1	1	1	1	0.74598396	22.695068
b179	0	Experiment 14	Stack_col_14_15.tif	239.73914	0	1	1	1	0.87126136	19.775312
b180	0	Experiment 14	Stack_col_14_15.tif	244.04167	0	1	1	1	0.9019139	20.530634
b181	0	Experiment 14	Stack_col_14_15.tif	239.35135	0	1	1	1	0.9776876	13.485009
b182	0	Experiment 14	Stack_col_14_15.tif	243.85135	1	1	1	1	0.76228374	32.37976
b183	0	Experiment 14	Stack_col_14_15.tif	240.35849	0	1	1	1	0.6817782	25.232912
b184	0	Experiment 14	Stack_col_14_15.tif	239.4423	0	1	1	1	0.805145	22.96225
b185	0	Experiment 14	Stack_col_14_15.tif	242.19148	1	1	1	1	0.45656264	44.68706
b186	0	Experiment 14	Stack_col_14_15.tif	242.90475	0	1	1	1	0.96927804	18.715555
b187	0	Experiment 14	Stack_col_14_15.tif	243.37314	0	1	1	1	0.7894737	27.950006
b188	0	Experiment 14	Stack_col_14_15.tif	242.59259	0	1	1	1	0.6018267	33.35578
b189	0	Experiment 14	Stack_col_14_15.tif	241.93549	0	1	1	1	0.6005205	28.788765
b190	0	Experiment 14	Stack_col_14_15.tif	243.28261	1	1	1	1	0.9602233	21.82442
b191	0	Experiment 14	Stack_col_14_15.tif	239.0	1	1	1	1	0.61377066	34.330555
b192	0	Experiment 14	Stack_col_14_15.tif	243.36171	0	1	1	1	0.8422188	19.22149
b193	0	Experiment 14	Stack_col_14_15.tif	235.33333	0	1	1	1	0.6401606	27.229322
b194	0	Experiment 14	Stack_col_14_15.tif	238.76744	0	1	1	1	0.9407868	18.245905
b195	0	Experiment 14	Stack_col_14_15.tif	241.36586	0	1	1	1	0.91955394	17.104794
b196	0	Experiment 14	Stack_col_14_15.tif	241.0	1	1	1	1	0.7232525	30.456879
b197	0	Experiment 14	Stack_col_14_15.tif	240.36154	1	1	1	1	0.30194023	63.653522
b198	0	Experiment 14	Stack_col_14_15.tif	238.60606	1	1	1	1	0.4054664	79.80219
b199	0	Experiment 14	Stack_col_14_15.tif	244.4762	0	1	1	1	0.7915351	19.503317
b200	0	Experiment 14	Stack_col_14_15.tif	237.0339	0	1	1	1	0.7898669	27.029432
b201	0	Experiment 14	Stack_col_14_15.tif	239.34	0	1	1	1	0.87876886	21.173105
b202	0	Experiment 14	Stack_col_14_15.tif	230.55556	1	1	1	1	0.87768716	21.161318
b203	0	Experiment 14	Stack_col_14_15.tif	244.21153	0	1	1	1	0.76108134	26.60771
b204	0	Experiment 14	Stack_col_14_15.tif	242.2037	0	1	1	1	0.95724463	23.995813
b205	0	Experiment 14	Stack_col_14_15.tif	242.30952	1	1	1	1	0.75636035	37.727825
b206	0	Experiment 14	Stack_col_14_15.tif	240.97469	0	1	1	1	0.46568438	42.69252
b207	0	Experiment 14	Stack_col_14_15.tif	239.28813	0	1	1	1	0.870156	28.607365
b208	0	Experiment 14	Stack_col_14_15.tif	241.93024	1	1	1	1	0.96666664	17.455133
b209	0	Experiment 14	Stack_col_14_15.tif	234.70589	0	1	1	1	0.64223146	23.812737
b210	0	Experiment 14	Stack_col_14_15.tif	243.7705	0	1	1	1	0.9371782	26.99029
b211	0	Experiment 14	Stack_col_14_15.tif	241.2683	1	1	1	1	0.8591331	17.752829
b212	0	Experiment 14	Stack_col_14_15.tif	247.96153	0	1	1	1	0.989071	11.4081745
b213	0	Experiment 14	Stack_col_14_15.tif	245.33333	0	1	1	1	0.88304096	15.286266
b214	0	Experiment 14	Stack_col_14_15.tif	244.0	0	1	1	1	0.8212958	28.656414
b215	0	Experiment 14	Stack_col_14_15.tif	242.44444	1	1	1	1	0.98255354	18.636404
b216	0	Experiment 14	Stack_col_14_15.tif	238.09639	1	1	1	1	0.58471453	38.429714
b217	0	Experiment 14	Stack_col_14_15.tif	242.7069	1	1	1	1	0.77506655	33.91603
b218	0	Experiment 14	Stack_col_14_15.tif	243.1017	1	1	1	1	0.9627972	25.50787
b219	0	Experiment 14	Stack_col_14_15.tif	242.60345	0	1	1	1	0.822316	27.139536
b220	0	Experiment 14	Stack_col_14_15.tif	241.6579	0	1	1	1	0.807192	15.764401
b221	0	Experiment 14	Stack_col_14_15.tif	238.3158	0	1	1	1	0.86638296	17.699196
b222	0	Experiment 14	Stack_col_14_15.tif	243.42592	0	1	1	1	0.79030335	25.68406
b223	0	Experiment 14	Stack_col_14_15.tif	241.32	0	1	1	1	0.68546844	24.684315
b224	0	Experiment 14	Stack_col_14_15.tif	243.28572	0	1	1	1	0.9080983	17.936863
b225	0	Experiment 14	Stack_col_14_15.tif	236.79366	1	1	1	1	0.68686134	29.489847
b226	0	Experiment 14	Stack_col_14_15.tif	241.8077	0	1	1	1	0.738143	36.571915
b227	0	Experiment 14	Stack_col_14_15.tif	241.76596	0	1	1	1	0.67304015	22.653969
b228	0	Experiment 14	Stack_col_14_15.tif	241.20409	0	1	1	1	0.8013172	25.204342
b229	0	Experiment 14	Stack_col_14_15.tif	244.20895	0	1	1	1	0.90150845	30.575264
b230	0	Experiment 14	Stack_col_14_15.tif	242.40384	0	1	1	1	0.7030548	26.339697
b231	0	Experiment 14	Stack_col_14_15.tif	239.35849	0	1	1	1	0.84333986	25.55768
b232	0	Experiment 14	Stack_col_14_15.tif	242.79488	0	1	1	1	0.96	17.410696
b233	0	Experiment 14	Stack_col_14_15.tif	237.60527	0	1	1	1	0.9472948	17.049984
b234	0	Experiment 14	Stack_col_14_15.tif	243.25714	0	1	1	1	0.96529174	16.075966
b235	0	Experiment 14	Stack_col_14_15.tif	240.51923	0	1	1	1	0.84886014	23.468973
b236	0	Experiment 14	Stack_col_14_15.tif	242.38095	0	1	1	1	0.8465312	18.385416
b237	0	Experiment 14	Stack_col_14_15.tif	242.93243	0	1	1	1	0.76326394	33.326553
b238	0	Experiment 14	Stack_col_14_15.tif	241.2439	0	1	1	1	0.74917275	17.289457
b239	0	Experiment 14	Stack_col_14_15.tif	243.77037	0	1	1	1	0.36203223	61.185894
b240	0	Experiment 14	Stack_col_14_15.tif	241.19148	0	1	1	1	0.840399	20.75408
b241	0	Experiment 14	Stack_col_14_15.tif	244.975	0	1	1	1	0.8340486	17.708408
b242	0	Experiment 14	Stack_col_14_15.tif	241.89362	0	1	1	1	0.9095641	21.567009
b243	0	Experiment 14	Stack_col_14_15.tif	242.16455	0	1	1	1	0.6128185	35.545483
b244	0	Experiment 14	Stack_col_14_15.tif	243.97144	0	1	1	1	0.91067964	15.604695
b245	0	Experiment 14	Stack_col_14_15.tif	240.5	1	1	1	1	0.6275402	32.133747
b246	0	Experiment 14	Stack_col_14_15.tif	241.93182	0	1	1	1	0.8490696	19.162247
b247	0	Experiment 14	Stack_col_14_15.tif	246.53192	0	1	1	1	0.9375848	20.945862
b248	0	Experiment 14	Stack_col_14_15.tif	244.88373	0	1	1	1	0.94799405	19.75157
b249	0	Experiment 14	Stack_col_14_15.tif	240.57143	0	1	1	1	0.95454544	18.977999
b250	0	Experiment 14	Stack_col_14_15.tif	243.2766	0	1	1	1	0.9094264	20.646254
b251	0	Experiment 14	Stack_col_14_15.tif	242.68657	0	1	1	1	0.7246531	31.221151
b252	0	Experiment 14	Stack_col_14_15.tif	243.40984	0	1	1	1	0.7012602	29.002773
b253	0	Experiment 14	Stack_col_14_15.tif	234.76744	0	1	1	1	0.5459854	21.16541
b254	0	Experiment 14	Stack_col_14_15.tif	239.23457	1	1	1	1	0.77956635	36.609295
b255	0	Experiment 14	Stack_col_14_15.tif	243.30302	0	1	1	1	0.94532806	14.912729
b256	0	Experiment 14	Stack_col_14_15.tif	233.29033	0	1	1	1	0.8759124	13.996155
b257	0	Experiment 14	Stack_col_14_15.tif	244.8625	1	1	1	1	0.63762885	35.944412
b258	0	Experiment 14	Stack_col_14_15.tif	236.67143	0	1	1	1	0.9038113	31.490118
b259	0	Experiment 14	Stack_col_14_15.tif	240.96808	1	1	1	1	0.8652819	46.232304
b260	0	Experiment 14	Stack_col_14_15.tif	238.96666	0	1	1	1	0.7398693	26.24996
b261	0	Experiment 14	Stack_col_14_15.tif	246.08333	1	1	1	1	0.68239677	32.866436
b262	0	Experiment 14	Stack_col_14_15.tif	241.21277	0	1	1	1	0.7838141	20.98945
b263	0	Experiment 14	Stack_col_14_15.tif	242.58109	0	1	1	1	0.79553634	32.869556
b264	0	Experiment 14	Stack_col_14_15.tif	243.93103	0	1	1	1	0.750655	25.531527
b265	0	Experiment 14	Stack_col_14_15.tif	240.15384	0	1	1	1	0.7902023	23.822336
b266	0	Experiment 14	Stack_col_14_15.tif	245.33333	0	1	1	1	0.96103895	12.149454
b267	0	Experiment 14	Stack_col_14_15.tif	238.48837	0	1	1	1	0.9353312	20.206306
b268	0	Experiment 14	Stack_col_14_15.tif	242.1884	0	1	1	1	0.7963801	31.607569
b269	0	Experiment 14	Stack_col_14_15.tif	233.83824	0	1	1	1	0.6939929	31.28782
b270	0	Experiment 14	Stack_col_14_15.tif	243.76	0	1	1	1	0.56251526	35.706066
b271	0	Experiment 14	Stack_col_14_15.tif	240.96	0	1	1	1	0.9053445	22.737303
b272	0	Experiment 14	Stack_col_14_15.tif	242.11111	0	1	1	1	0.85085577	21.6981
b273	0	Experiment 14	Stack_col_14_15.tif	241.01613	1	1	1	1	0.9220513	26.336811
b274	0	Experiment 14	Stack_col_14_15.tif	240.39583	0	1	1	1	0.79341656	25.19113
b275	0	Experiment 14	Stack_col_14_15.tif	242.83928	1	1	1	1	0.7947706	23.844938
b276	0	Experiment 14	Stack_col_14_15.tif	239.98508	0	1	1	1	0.7069151	29.11839
b277	0	Experiment 14	Stack_col_14_15.tif	243.31429	0	1	1	1	0.9381818	15.5452385
b278	0	Experiment 14	Stack_col_14_15.tif	244.67647	0	1	1	1	0.7745098	30.1396
b279	0	Experiment 14	Stack_col_14_15.tif	242.15384	0	1	1	1	0.7933635	25.930647
b280	0	Experiment 14	Stack_col_14_15.tif	241.73334	0	1	1	1	0.890604	20.36194
b281	0	Experiment 14	Stack_col_14_15.tif	241.1132	1	1	1	1	0.896412	23.230856
b282	0	Experiment 14	Stack_col_14_15.tif	244.7551	0	1	1	1	0.8387446	23.345333
b283	0	Experiment 14	Stack_col_14_15.tif	242.33333	1	1	1	1	0.8127046	36.521145
b284	0	Experiment 14	Stack_col_14_15.tif	239.16	0	1	1	1	0.869455	21.657738
b285	0	Experiment 14	Stack_col_14_15.tif	238.21875	0	1	1	1	0.4069918	28.615784
b286	0	Experiment 14	Stack_col_14_15.tif	238.63829	0	1	1	1	0.81238616	21.939377
b287	0	Experiment 14	Stack_col_14_15.tif	241.5577	0	1	1	1	0.94285715	21.787834
b288	0	Experiment 14	Stack_col_14_15.tif	244.02438	0	1	1	1	0.93939394	17.100174
b289	0	Experiment 14	Stack_col_14_15.tif	239.37288	0	1	1	1	0.66424537	25.91156
b290	0	Experiment 14	Stack_col_14_15.tif	241.55103	0	1	1	1	0.7523709	22.657434
b291	0	Experiment 14	Stack_col_14_15.tif	241.8372	0	1	1	1	0.8594816	18.454079
b292	0	Experiment 14	Stack_col_14_15.tif	240.55103	0	1	1	1	0.9418919	20.70197
b293	0	Experiment 14	Stack_col_14_15.tif	235.44186	1	1	1	1	0.90431654	19.009054
b294	0	Experiment 14	Stack_col_14_15.tif	242.22223	0	1	1	1	0.9014599	15.203012
b295	0	Experiment 14	Stack_col_14_15.tif	240.60464	1	1	1	1	0.44283995	38.842033
b296	0	Experiment 14	Stack_col_14_15.tif	242.75	0	1	1	1	0.9264706	18.241102
b297	0	Experiment 14	Stack_col_14_15.tif	237.98245	0	1	1	1	0.7971564	28.210144
b298	0	Experiment 14	Stack_col_14_15.tif	239.91667	0	1	1	1	0.9468691	15.425522
b299	0	Experiment 14	Stack_col_14_15.tif	244.51163	0	1	1	1	0.94177586	19.474636
b300	0	Experiment 14	Stack_col_14_15.tif	240.36633	1	1	1	1	0.75308645	46.866177
b301	0	Experiment 14	Stack_col_14_15.tif	239.47728	0	1	1	1	0.8168568	21.055944
b302	0	Experiment 14	Stack_col_14_15.tif	245.55225	0	1	1	1	0.8178939	30.190325
b303	0	Experiment 14	Stack_col_14_15.tif	247.42857	0	1	1	1	0.94622093	18.627262
b304	0	Experiment 14	Stack_col_14_15.tif	244.42	0	1	1	1	0.93375796	21.815542
b305	0	Experiment 14	Stack_col_14_15.tif	244.04256	0	1	1	1	0.9648876	20.819328
b306	0	Experiment 14	Stack_col_14_15.tif	238.41026	0	1	1	1	0.95652175	16.71751
b307	0	Experiment 14	Stack_col_14_15.tif	242.86792	0	1	1	1	0.81606215	26.064022
b308	0	Experiment 14	Stack_col_14_15.tif	241.8125	0	1	1	1	0.8714107	21.516747
b309	0	Experiment 14	Stack_col_14_15.tif	244.37419	1	1	1	1	0.49887225	67.48382
b310	0	Experiment 14	Stack_col_14_15.tif	240.55556	0	1	1	1	0.57326007	28.488396
b311	0	Experiment 14	Stack_col_14_15.tif	242.56	0	1	1	1	0.8008801	22.103796
b312	0	Experiment 14	Stack_col_14_15.tif	235.28947	1	1	1	1	0.47708267	33.34029
b313	0	Experiment 14	Stack_col_14_15.tif	241.30646	1	1	1	1	0.9296066	26.858183
b314	0	Experiment 14	Stack_col_14_15.tif	244.86667	0	1	1	1	0.9234043	13.407669
b315	0	Experiment 14	Stack_col_14_15.tif	243.29851	0	1	1	1	0.47750118	29.771862
b316	0	Experiment 14	Stack_col_14_15.tif	243.56863	0	1	1	1	0.8028169	24.122107
b317	0	Experiment 14	Stack_col_14_15.tif	241.6129	0	1	1	1	0.78609157	18.659119
b318	0	Experiment 14	Stack_col_14_15.tif	242.43835	1	1	1	1	0.5980285	33.92378
b319	0	Experiment 14	Stack_col_14_15.tif	232.75676	1	1	1	1	0.5932072	37.044655
b320	0	Experiment 14	Stack_col_14_15.tif	238.89473	0	1	1	1	0.7961847	24.719587
b321	0	Experiment 14	Stack_col_14_15.tif	234.8125	0	1	1	1	0.5687337	37.580524
b322	0	Experiment 14	Stack_col_14_15.tif	242.92958	1	1	1	1	0.5213259	31.154194
b323	0	Experiment 14	Stack_col_14_15.tif	235.92537	0	1	1	1	0.7165063	26.955153
b324	0	Experiment 14	Stack_col_14_15.tif	243.21538	0	1	1	1	0.56526643	34.476463
b325	0	Experiment 14	Stack_col_14_15.tif	241.26315	0	1	1	1	0.6992007	25.968534
b326	0	Experiment 14	Stack_col_14_15.tif	241.21428	1	1	1	1	0.49688548	34.07603
b327	0	Experiment 14	Stack_col_14_15.tif	241.96	0	1	1	1	0.72568095	32.719635
b328	0	Experiment 14	Stack_col_14_15.tif	245.5618	1	1	1	1	0.64010626	43.39652
b329	0	Experiment 14	Stack_col_14_15.tif	239.62195	0	1	1	1	0.6826923	35.56682
b330	0	Experiment 14	Stack_col_14_15.tif	240.33333	0	1	1	1	0.96279067	13.407166
b331	0	Experiment 14	Stack_col_14_15.tif	242.92857	0	1	1	1	0.90263265	32.683426
b332	0	Experiment 14	Stack_col_14_15.tif	244.4151	0	1	1	1	0.9311841	23.314156
b333	0	Experiment 14	Stack_col_14_15.tif	241.58537	0	1	1	1	0.9173291	18.106451
b334	0	Experiment 14	Stack_col_14_15.tif	240.9	0	1	1	1	0.918138	18.420574
b335	0	Experiment 14	Stack_col_14_15.tif	246.20454	0	1	1	1	0.94822484	19.091791
b336	0	Experiment 14	Stack_col_14_15.tif	243.96774	1	1	1	1	0.909445	27.821138
b337	0	Experiment 14	Stack_col_14_15.tif	240.60715	1	1	1	1	0.8659902	37.419342
b338	0	Experiment 14	Stack_col_14_15.tif	240.57971	0	1	1	1	0.5445112	32.09689
b339	0	Experiment 14	Stack_col_14_15.tif	241.07594	1	1	1	1	0.8791946	35.33954
b340	0	Experiment 14	Stack_col_14_15.tif	244.48387	1	1	1	1	0.54372627	31.60388
b341	0	Experiment 14	Stack_col_14_15.tif	242.725	0	1	1	1	0.8757862	18.31836
b342	0	Experiment 14	Stack_col_14_15.tif	243.66667	0	1	1	1	0.9	17.902388
b343	0	Experiment 14	Stack_col_14_15.tif	238.91429	0	1	1	1	0.9407338	15.639607
b344	0	Experiment 14	Stack_col_14_15.tif	245.06667	0	1	1	1	0.72053605	29.884146
b345	0	Experiment 14	Stack_col_14_15.tif	242.82759	0	1	1	1	0.9049881	14.725422
b346	0	Experiment 14	Stack_col_14_15.tif	241.21951	0	1	1	1	0.8630339	17.823538
b347	0	Experiment 14	Stack_col_14_15.tif	245.42308	0	1	1	1	0.8968059	14.7653
b348	0	Experiment 14	Stack_col_14_15.tif	242.5	0	1	1	1	0.92652124	23.606155
b349	0	Experiment 14	Stack_col_14_15.tif	236.65334	1	1	1	1	0.78430694	35.499557
b350	0	Experiment 14	Stack_col_14_15.tif	240.43637	0	1	1	1	0.78333336	25.230417
b351	0	Experiment 14	Stack_col_14_15.tif	240.78049	0	1	1	1	0.96836555	17.159113
b352	0	Experiment 14	Stack_col_14_15.tif	242.71428	0	1	1	1	0.8326253	29.055103
b353	0	Experiment 14	Stack_col_14_15.tif	240.67567	0	1	1	1	0.92391306	17.64885
b354	0	Experiment 14	Stack_col_14_15.tif	243.97728	0	1	1	1	0.9163663	19.236475
b355	0	Experiment 14	Stack_col_14_15.tif	238.90244	0	1	1	1	0.7564698	23.210323
b356	0	Experiment 14	Stack_col_14_15.tif	242.05	0	1	1	1	0.6752283	23.252003
b357	0	Experiment 14	Stack_col_14_15.tif	243.0	1	1	1	1	0.7503597	30.893644
b358	0	Experiment 14	Stack_col_14_15.tif	240.73611	0	1	1	1	0.55228585	33.229965
b359	0	Experiment 14	Stack_col_14_15.tif	243.95454	0	1	1	1	0.9587156	18.507225
b360	0	Experiment 14	Stack_col_14_15.tif	243.92728	0	1	1	1	0.874424	23.768396
b361	0	Experiment 14	Stack_col_14_15.tif	241.11429	0	1	1	1	0.9446565	15.324542
b362	0	Experiment 14	Stack_col_14_15.tif	243.8923	0	1	1	1	0.62312216	28.181309
b363	0	Experiment 14	Stack_col_14_15.tif	245.91429	0	1	1	1	0.8905983	15.849421
b364	0	Experiment 14	Stack_col_14_15.tif	243.04	1	1	1	1	0.7312253	32.881767
b365	0	Experiment 14	Stack_col_14_15.tif	239.15218	0	1	1	1	0.9590643	20.194365
b366	0	Experiment 14	Stack_col_14_15.tif	240.72728	0	1	1	1	0.8928962	23.682508
b367	0	Experiment 14	Stack_col_14_15.tif	244.15909	0	1	1	1	0.82658225	20.317648
b368	0	Experiment 14	Stack_col_14_15.tif	242.56522	0	1	1	1	0.8628429	21.309483
b369	0	Experiment 14	Stack_col_14_15.tif	241.96053	0	1	1	1	0.88295364	34.218292
b370	0	Experiment 14	Stack_col_14_15.tif	243.24074	0	1	1	1	0.7824773	24.368498
b371	0	Experiment 14	Stack_col_14_15.tif	242.94737	0	1	1	1	0.6596899	26.726248
b372	0	Experiment 14	Stack_col_14_15.tif	237.72223	0	1	1	1	0.9541985	16.700333
b373	0	Experiment 14	Stack_col_14_15.tif	241.19565	0	1	1	1	0.76457644	22.273441
b374	0	Experiment 14	Stack_col_14_15.tif	247.10938	1	1	1	1	0.88849866	28.892624
b375	0	Experiment 14	Stack_col_14_15.tif	242.68518	0	1	1	1	0.832618	23.995262
b376	0	Experiment 14	Stack_col_14_15.tif	237.73215	1	1	1	1	0.8562708	27.173882
b377	0	Experiment 14	Stack_col_14_15.tif	243.625	0	1	1	1	0.9587766	20.686169
b378	0	Experiment 14	Stack_col_14_15.tif	243.7742	0	1	1	1	0.9492274	15.638776
b379	0	Experiment 14	Stack_col_14_15.tif	239.0	0	1	1	1	0.75641024	27.146095
b380	0	Experiment 14	Stack_col_14_15.tif	242.48529	1	1	1	1	0.42062852	39.359043
b381	0	Experiment 14	Stack_col_14_15.tif	236.63014	0	1	1	1	0.6061047	31.44873
b382	0	Experiment 14	Stack_col_14_15.tif	237.64062	0	1	1	1	0.5732165	26.125525
b383	0	Experiment 14	Stack_col_14_15.tif	239.7317	0	1	1	1	0.88478583	19.420074
b384	0	Experiment 14	Stack_col_14_15.tif	241.33928	1	1	1	1	0.96915776	24.384083
b385	0	Experiment 14	Stack_col_14_15.tif	241.7705	0	1	1	1	0.72032195	27.409811
b386	0	Experiment 14	Stack_col_14_15.tif	229.02272	0	1	1	1	0.9799073	18.889019
b387	0	Experiment 14	Stack_col_14_15.tif	242.28125	1	1	1	1	0.77795786	16.841906
b388	0	Experiment 14	Stack_col_14_15.tif	241.02438	0	1	1	1	0.6987254	22.037174
b389	0	Experiment 14	Stack_col_14_15.tif	241.34616	0	1	1	1	0.8474026	23.9119
b390	0	Experiment 14	Stack_col_14_15.tif	243.26389	0	1	1	1	0.53479123	34.024567
b391	0	Experiment 14	Stack_col_14_15.tif	243.16327	0	1	1	1	0.7951002	21.719322
b392	0	Experiment 14	Stack_col_14_15.tif	236.76596	0	1	1	1	0.8616734	19.363165
b393	0	Experiment 14	Stack_col_14_15.tif	244.15094	1	1	1	1	0.90983605	23.097555
b394	0	Experiment 14	Stack_col_14_15.tif	242.0845	0	1	1	1	0.39221063	35.329876
b395	0	Experiment 14	Stack_col_14_15.tif	242.8	0	1	1	1	0.51279885	27.436373
b396	0	Experiment 14	Stack_col_14_15.tif	230.19565	0	1	1	1	0.8297003	19.685637
b397	0	Experiment 14	Stack_col_14_15.tif	236.9	0	1	1	1	0.95431894	18.858345
b398	0	Experiment 14	Stack_col_14_15.tif	239.94872	0	1	1	1	0.8306333	33.67088
b399	0	Experiment 14	Stack_col_14_15.tif	240.87097	0	1	1	1	0.7147555	27.913002
b400	0	Experiment 14	Stack_col_14_15.tif	232.90909	0	1	1	1	0.9694323	14.722793
b401	0	Experiment 14	Stack_col_14_15.tif	243.86154	0	1	1	1	0.6848358	30.097473
b402	0	Experiment 14	Stack_col_14_15.tif	240.73256	0	1	1	1	0.63433945	39.19475
b403	0	Experiment 14	Stack_col_14_15.tif	239.54167	0	1	1	1	0.9301676	20.6143
b404	0	Experiment 14	Stack_col_14_15.tif	241.45454	0	1	1	1	0.9809725	15.097824
b405	0	Experiment 14	Stack_col_14_15.tif	241.48529	1	1	1	1	0.7465505	34.210175
b406	0	Experiment 14	Stack_col_14_15.tif	242.975	0	1	1	1	0.96517414	18.07419
b407	0	Experiment 14	Stack_col_14_15.tif	232.71153	1	1	1	1	0.7811861	22.985668
b408	0	Experiment 14	Stack_col_14_15.tif	242.7451	0	1	1	1	0.7136061	24.243853
b409	0	Experiment 14	Stack_col_14_15.tif	233.67567	1	1	1	1	0.5186409	32.48812
b410	0	Experiment 14	Stack_col_14_15.tif	240.40625	0	1	1	1	0.89694655	29.627916
b411	0	Experiment 14	Stack_col_14_15.tif	239.90196	0	1	1	1	0.9220779	23.380007
b412	0	Experiment 14	Stack_col_14_15.tif	243.14473	0	1	1	1	0.50975555	35.786194
b413	0	Experiment 14	Stack_col_14_15.tif	242.47437	1	1	1	1	0.8333333	34.969856
b414	0	Experiment 14	Stack_col_14_15.tif	242.53969	0	1	1	1	0.864215	27.552849
b415	0	Experiment 14	Stack_col_14_15.tif	241.55882	0	1	1	1	0.9583333	15.2086115
b416	0	Experiment 14	Stack_col_14_15.tif	237.64583	0	1	1	1	0.86609334	20.623453
b417	0	Experiment 14	Stack_col_14_15.tif	241.09334	0	1	1	1	0.67001253	34.773106
b418	0	Experiment 14	Stack_col_14_15.tif	240.80556	0	1	1	1	0.9003559	15.959091
b419	0	Experiment 14	Stack_col_14_15.tif	234.51219	0	1	1	1	0.93109244	17.556293
b420	0	Experiment 14	Stack_col_14_15.tif	235.27118	0	1	1	1	0.8042025	25.797573
b421	0	Experiment 14	Stack_col_14_15.tif	241.31818	0	1	1	1	0.7382006	30.000689
b422	0	Experiment 14	Stack_col_14_15.tif	240.81395	0	1	1	1	0.8600823	19.519815
b423	0	Experiment 14	Stack_col_14_15.tif	240.06451	0	1	1	1	0.9590444	13.172763
b424	0	Experiment 14	Stack_col_14_15.tif	245.72728	0	1	1	1	0.7729636	20.17846
b425	0	Experiment 14	Stack_col_14_15.tif	243.57576	1	1	1	1	0.95537525	15.242387
b426	0	Experiment 14	Stack_col_14_15.tif	241.53847	0	1	1	1	0.8195202	22.538963
b427	0	Experiment 14	Stack_col_14_15.tif	246.1842	0	1	1	1	0.9009288	17.009716
b428	0	Experiment 14	Stack_col_14_15.tif	239.40625	0	1	1	1	0.74876845	17.42389
b429	0	Experiment 14	Stack_col_14_15.tif	243.48276	0	1	1	1	0.92098767	12.9431505
b430	0	Experiment 14	Stack_col_14_15.tif	241.66667	0	1	1	1	0.8716082	20.042463
b431	0	Experiment 14	Stack_col_14_15.tif	244.12857	0	1	1	1	0.7970803	33.397472
b432	0	Experiment 14	Stack_col_14_15.tif	236.90384	0	1	1	1	0.78969073	26.922543
b433	0	Experiment 14	Stack_col_14_15.tif	241.27272	1	1	1	1	0.33996254	74.659096
b434	0	Experiment 14	Stack_col_14_15.tif	243.5	0	1	1	1	0.8530303	16.825068
b435	0	Experiment 14	Stack_col_14_15.tif	241.22223	0	1	1	1	0.72404116	23.962502
b436	0	Experiment 14	Stack_col_14_15.tif	242.66101	0	1	1	1	0.84452975	26.623343
b437	0	Experiment 14	Stack_col_14_15.tif	240.7705	1	1	1	1	0.90416265	28.550533
b438	0	Experiment 14	Stack_col_14_15.tif	238.7258	0	1	1	1	0.6513437	28.722063
b439	0	Experiment 14	Stack_col_14_15.tif	242.08333	1	1	1	1	0.8472222	23.77372
b440	0	Experiment 14	Stack_col_14_15.tif	240.18182	0	1	1	1	0.7259508	19.95011
b441	0	Experiment 14	Stack_col_14_15.tif	239.10959	0	1	1	1	0.8056402	31.924215
b442	0	Experiment 14	Stack_col_14_15.tif	239.34616	0	1	1	1	0.86031747	23.818136
b443	0	Experiment 14	Stack_col_14_15.tif	240.73334	0	1	1	1	0.8301887	20.146383
b444	0	Experiment 14	Stack_col_14_15.tif	237.575	0	1	1	1	0.78475654	17.52322
b445	0	Experiment 14	Stack_col_14_15.tif	241.81944	1	1	1	1	0.6603194	32.249794
b446	0	Experiment 14	Stack_col_14_15.tif	241.53192	0	1	1	1	0.66775244	44.92
b447	0	Experiment 14	Stack_col_14_15.tif	243.2459	1	1	1	1	0.39189732	59.49778
b448	0	Experiment 14	Stack_col_14_15.tif	237.59259	0	1	1	1	0.9093199	15.630796
b449	0	Experiment 14	Stack_col_14_15.tif	243.89473	0	1	1	1	0.8032544	16.809055
b450	0	Experiment 14	Stack_col_14_15.tif	243.90384	0	1	1	1	0.96444446	25.13102
b451	0	Experiment 14	Stack_col_14_15.tif	242.78847	0	1	1	1	0.8503363	22.794077
b452	0	Experiment 14	Stack_col_14_15.tif	246.77272	0	1	1	1	0.8947368	19.70404
b453	0	Experiment 14	Stack_col_14_15.tif	242.97826	0	1	1	1	0.969163	21.134512
b454	0	Experiment 14	Stack_col_14_15.tif	239.70454	0	1	1	1	0.93209875	18.01163
b455	0	Experiment 14	Stack_col_14_15.tif	243.17392	0	1	1	1	0.87101066	19.690857
b456	0	Experiment 14	Stack_col_14_15.tif	242.93939	0	1	1	1	0.7099567	28.709229
b457	0	Experiment 14	Stack_col_14_15.tif	239.45714	0	1	1	1	0.8865248	16.833403
b458	0	Experiment 14	Stack_col_14_15.tif	243.35088	0	1	1	1	0.8686274	32.03994
b459	0	Experiment 14	Stack_col_14_15.tif	243.23334	0	1	1	1	0.9542334	14.714863
b460	0	Experiment 14	Stack_col_14_15.tif	240.66667	0	1	1	1	0.9335605	17.374884
b461	0	Experiment 14	Stack_col_14_15.tif	239.97826	0	1	1	1	0.94512194	18.873486
b462	0	Experiment 14	Stack_col_14_15.tif	240.87755	1	1	1	1	0.95929444	21.472378
b463	0	Experiment 14	Stack_col_14_15.tif	241.58139	0	1	1	1	0.884058	19.218351
b464	0	Experiment 14	Stack_col_14_15.tif	243.22223	0	1	1	1	0.85395765	24.914728
b465	0	Experiment 14	Stack_col_14_15.tif	242.83784	1	1	1	1	0.70417196	34.148132
b466	0	Experiment 14	Stack_col_14_15.tif	235.18182	0	1	1	1	0.9352227	14.723856
b467	0	Experiment 14	Stack_col_14_15.tif	244.11363	0	1	1	1	0.94134897	18.736294
b468	0	Experiment 14	Stack_col_14_15.tif	244.31111	0	1	1	1	0.81650245	19.495596
b469	0	Experiment 14	Stack_col_14_15.tif	244.39622	0	1	1	1	0.7745665	24.358025
b470	0	Experiment 14	Stack_col_14_15.tif	246.46378	0	1	1	1	0.70126414	31.043203
b471	0	Experiment 14	Stack_col_14_15.tif	241.40323	1	1	1	1	0.9334038	25.720322
b472	0	Experiment 14	Stack_col_14_15.tif	241.19148	1	1	1	1	0.9158621	19.476688
b473	0	Experiment 14	Stack_col_14_15.tif	242.625	0	1	1	1	0.9043659	13.730261
b474	0	Experiment 14	Stack_col_14_15.tif	241.09525	0	1	1	1	0.9255663	17.007586
b475	0	Experiment 14	Stack_col_14_15.tif	245.88235	0	1	1	1	0.9176357	15.816447
b476	0	Experiment 14	Stack_col_14_15.tif	243.375	1	1	1	1	0.7690632	21.982113
b477	0	Experiment 14	Stack_col_14_15.tif	240.92424	0	1	1	1	0.8503521	28.47586
b478	0	Experiment 14	Stack_col_14_15.tif	241.83333	1	1	1	1	0.63339114	39.896175
b479	0	Experiment 14	Stack_col_14_15.tif	241.32143	0	1	1	1	0.9971831	11.376528
b480	0	Experiment 14	Stack_col_14_15.tif	244.62746	0	1	1	1	0.79317695	25.629288
b481	0	Experiment 14	Stack_col_14_15.tif	243.40625	0	1	1	1	0.95931476	13.551342
b482	0	Experiment 14	Stack_col_14_15.tif	243.2653	0	1	1	1	0.84615386	20.555685
b483	0	Experiment 14	Stack_col_14_15.tif	240.33333	0	1	1	1	0.9360223	19.849554
b484	0	Experiment 14	Stack_col_14_15.tif	242.48837	0	1	1	1	0.97882736	17.912245
b485	0	Experiment 14	Stack_col_14_15.tif	236.0	0	1	1	1	0.6229624	28.178633
b486	0	Experiment 14	Stack_col_14_15.tif	243.24445	0	1	1	1	0.93494153	19.683434
b487	0	Experiment 14	Stack_col_14_15.tif	244.13889	0	1	1	1	0.92057765	15.606152
b488	0	Experiment 14	Stack_col_14_15.tif	240.0	0	1	1	1	0.91276044	20.22689
b489	0	Experiment 14	Stack_col_14_15.tif	242.5944	0	1	1	1	0.64711046	63.748077
b490	0	Experiment 14	Stack_col_14_15.tif	241.21053	0	1	1	1	0.8697479	24.737463
b491	0	Experiment 14	Stack_col_14_15.tif	243.76744	0	1	1	1	0.88135594	20.186615
b492	0	Experiment 14	Stack_col_14_15.tif	243.11594	1	1	1	1	0.7974105	32.795025
b493	0	Experiment 14	Stack_col_14_15.tif	240.88235	0	1	1	1	0.9181929	23.581642
b494	0	Experiment 14	Stack_col_14_15.tif	240.63889	0	1	1	1	0.9760956	14.939752
b495	0	Experiment 14	Stack_col_14_15.tif	240.2	0	1	1	1	0.77599555	21.735271
b496	0	Experiment 14	Stack_col_14_15.tif	240.4717	0	1	1	1	0.83225805	28.236956
b497	0	Experiment 14	Stack_col_14_15.tif	245.87755	0	1	1	1	0.86860466	23.633448
b498	0	Experiment 14	Stack_col_14_15.tif	240.075	1	1	1	1	0.94520545	17.40747
b499	0	Experiment 14	Stack_col_14_15.tif	242.95653	0	1	1	1	0.9362319	13.969764
b500	0	Experiment 14	Stack_col_14_15.tif	231.25	1	1	1	1	0.86634266	20.914904
b501	0	Experiment 14	Stack_col_14_15.tif	241.08888	1	1	1	1	0.95766425	22.61099
b502	0	Experiment 14	Stack_col_14_15.tif	245.54546	1	1	1	1	0.73357373	32.381657
b503	0	Experiment 14	Stack_col_14_15.tif	237.0	0	1	1	1	0.9398148	14.746646
b504	0	Experiment 14	Stack_col_14_15.tif	239.64407	0	1	1	1	0.9532033	26.450378
b505	0	Experiment 14	Stack_col_14_15.tif	241.225	0	1	1	1	0.90547264	16.259874
b506	0	Experiment 14	Stack_col_14_15.tif	234.1374	1	1	1	1	0.43225944	55.852
b507	0	Experiment 14	Stack_col_14_15.tif	237.06522	0	1	1	1	0.7855478	21.771307
b508	0	Experiment 14	Stack_col_14_15.tif	237.3158	0	1	1	1	0.92385787	16.776102
b509	0	Experiment 14	Stack_col_14_15.tif	242.19354	0	1	1	1	0.98139536	13.162877
b510	0	Experiment 14	Stack_col_14_15.tif	242.55556	0	1	1	1	0.8781794	20.098808
b511	0	Experiment 14	Stack_col_14_15.tif	242.56522	0	1	1	1	0.8199052	20.42487
b512	0	Experiment 14	Stack_col_14_15.tif	243.58974	0	1	1	1	0.89638156	16.309748
b513	0	Experiment 14	Stack_col_14_15.tif	244.16394	0	1	1	1	0.8814959	26.544722
b514	0	Experiment 14	Stack_col_14_15.tif	245.61017	0	1	1	1	0.7714903	25.753046
b515	0	Experiment 14	Stack_col_14_15.tif	242.61702	0	1	1	1	0.829639	19.685564
b516	0	Experiment 14	Stack_col_14_15.tif	243.8	0	1	1	1	0.9039634	18.460396
b517	0	Experiment 14	Stack_col_14_15.tif	242.40475	0	1	1	1	0.95211494	18.718147
b518	0	Experiment 14	Stack_col_14_15.tif	242.0238	0	1	1	1	0.8742424	18.362928
b519	0	Experiment 14	Stack_col_14_15.tif	243.86487	0	1	1	1	0.90879476	16.345396
b520	0	Experiment 14	Stack_col_14_15.tif	238.31035	1	1	1	1	0.8674204	27.853735
b521	0	Experiment 14	Stack_col_14_15.tif	243.88637	1	1	1	1	0.9	20.89889
b522	0	Experiment 14	Stack_col_14_15.tif	244.33871	0	1	1	1	0.82166123	27.630909
b523	0	Experiment 14	Stack_col_14_15.tif	241.70422	0	1	1	1	0.82946354	31.131628
b524	0	Experiment 14	Stack_col_14_15.tif	239.68965	0	1	1	1	0.7351199	41.250744
b525	0	Experiment 14	Stack_col_14_15.tif	243.46297	0	1	1	1	0.87885463	22.661335
b526	0	Experiment 14	Stack_col_14_15.tif	241.93024	0	1	1	1	0.65208334	20.306236
b527	0	Experiment 14	Stack_col_14_15.tif	239.75	1	1	1	1	0.74339855	39.487835
b528	0	Experiment 14	Stack_col_14_15.tif	237.30159	0	1	1	1	0.547929	28.723072
b529	0	Experiment 14	Stack_col_14_15.tif	240.41861	0	1	1	1	0.96040374	19.22624
b530	0	Experiment 14	Stack_col_14_15.tif	240.69444	0	1	1	1	0.972973	15.691526
b531	0	Experiment 14	Stack_col_14_15.tif	242.58182	0	1	1	1	0.81529295	24.291704
b532	0	Experiment 14	Stack_col_14_15.tif	243.32143	0	1	1	1	0.6601256	25.547178
b533	0	Experiment 14	Stack_col_14_15.tif	242.125	0	1	1	1	0.9222316	17.37078
b534	0	Experiment 14	Stack_col_14_15.tif	242.2623	0	1	1	1	0.87881774	25.93702
b535	0	Experiment 14	Stack_col_14_15.tif	238.3125	1	1	1	1	0.64	32.81783
b536	0	Experiment 14	Stack_col_14_15.tif	240.71053	0	1	1	1	0.9494855	16.145271
b537	0	Experiment 14	Stack_col_14_15.tif	243.30138	1	1	1	1	0.664587	35.717457
b538	0	Experiment 14	Stack_col_14_15.tif	243.55714	0	1	1	1	0.7407407	32.211727
b539	0	Experiment 14	Stack_col_14_15.tif	242.4754	0	1	1	1	0.700313	31.385345
b540	0	Experiment 14	Stack_col_14_15.tif	241.43787	1	1	1	1	0.42120937	83.72785
b541	0	Experiment 14	Stack_col_14_15.tif	241.5614	1	1	1	1	0.87265134	25.66117
b542	0	Experiment 14	Stack_col_14_15.tif	245.92857	0	1	1	1	0.93607306	14.432612
b543	0	Experiment 14	Stack_col_14_15.tif	239.025	0	1	1	1	0.95683455	16.798798
b544	0	Experiment 14	Stack_col_14_15.tif	238.84483	1	1	1	1	0.75090253	29.654306
b545	0	Experiment 14	Stack_col_14_15.tif	241.48387	0	1	1	1	0.6627994	27.043467
b546	0	Experiment 14	Stack_col_14_15.tif	232.73334	0	1	1	1	0.9101124	20.00697
b547	0	Experiment 14	Stack_col_14_15.tif	242.04878	0	1	1	1	0.928125	16.940723
b548	0	Experiment 14	Stack_col_14_15.tif	243.80882	1	1	1	1	0.91071427	29.831148
b549	0	Experiment 14	Stack_col_14_15.tif	242.79488	0	1	1	1	0.866775	16.289959
b550	0	Experiment 14	Stack_col_14_15.tif	242.5	0	1	1	1	0.92162555	20.42845
b551	0	Experiment 14	Stack_col_14_15.tif	241.14285	1	1	1	1	0.78899086	23.299616
b552	0	Experiment 14	Stack_col_14_15.tif	240.16216	0	1	1	1	0.8986014	15.483994
b553	0	Experiment 14	Stack_col_14_15.tif	241.0685	1	1	1	1	0.6296296	33.325306
b554	0	Experiment 14	Stack_col_14_15.tif	243.22728	0	1	1	1	0.96390975	19.195892
b555	0	Experiment 14	Stack_col_14_15.tif	242.08955	0	1	1	1	0.7260808	30.90401
b556	0	Experiment 14	Stack_col_14_15.tif	242.25641	0	1	1	1	0.9782609	16.761806
b557	0	Experiment 14	Stack_col_14_15.tif	241.58928	1	1	1	1	0.7836812	24.681175
b558	0	Experiment 14	Stack_col_14_15.tif	242.69444	0	1	1	1	0.856898	16.638103
b559	0	Experiment 14	Stack_col_14_15.tif	240.38356	1	1	1	1	0.47324005	36.252903
b560	0	Experiment 14	Stack_col_14_15.tif	240.66667	0	1	1	1	0.969697	14.652632
b561	0	Experiment 14	Stack_col_14_15.tif	244.63043	1	1	1	1	0.8843085	19.949484
b562	0	Experiment 14	Stack_col_14_15.tif	240.3	1	1	1	1	0.37098894	64.8865
b563	0	Experiment 14	Stack_col_14_15.tif	238.46552	0	1	1	1	0.83744854	25.26687
b564	0	Experiment 14	Stack_col_14_15.tif	245.025	1	1	1	1	0.86904764	18.154074
b565	0	Experiment 14	Stack_col_14_15.tif	243.91936	0	1	1	1	0.6131701	32.46939
b566	0	Experiment 14	Stack_col_14_15.tif	242.675	0	1	1	1	0.9037267	17.296867
b567	0	Experiment 14	Stack_col_14_15.tif	241.4717	0	1	1	1	0.7571702	25.680923
b568	0	Experiment 14	Stack_col_14_15.tif	245.5	0	1	1	1	0.8746356	18.401102
b569	0	Experiment 14	Stack_col_14_15.tif	242.04109	1	1	1	1	0.66049385	32.320858
b570	0	Experiment 14	Stack_col_14_15.tif	240.74243	1	1	1	1	0.8016393	27.796545
b571	0	Experiment 14	Stack_col_14_15.tif	241.40475	0	1	1	1	0.9548387	17.513351
b572	0	Experiment 14	Stack_col_14_15.tif	241.45946	0	1	1	1	0.9228007	15.617415
b573	0	Experiment 14	Stack_col_14_15.tif	242.60655	0	1	1	1	0.9594017	26.57591
b574	0	Experiment 14	Stack_col_14_15.tif	243.37288	0	1	1	1	0.86585367	25.175652
b575	0	Experiment 14	Stack_col_14_15.tif	239.29688	0	1	1	1	0.8192568	30.98578
b576	0	Experiment 14	Stack_col_14_15.tif	239.86	0	1	1	1	0.7176351	22.55356
b577	0	Experiment 14	Stack_col_14_15.tif	240.31708	1	1	1	1	0.80508476	21.041348
b578	0	Experiment 14	Stack_col_14_15.tif	239.29167	0	1	1	1	0.8929032	22.345552
b579	0	Experiment 14	Stack_col_14_15.tif	243.82353	0	1	1	1	0.8916084	17.535118
b580	0	Experiment 14	Stack_col_14_15.tif	243.25926	0	1	1	1	0.895	15.397645
b581	0	Experiment 14	Stack_col_14_15.tif	240.97826	0	1	1	1	0.8070618	25.00963
b582	0	Experiment 14	Stack_col_14_15.tif	240.62746	1	1	1	1	0.83370787	23.806028
b583	0	Experiment 14	Stack_col_14_15.tif	243.22223	0	1	1	1	0.9411765	20.782772
b584	0	Experiment 14	Stack_col_14_15.tif	242.62318	0	1	1	1	0.70853573	29.442799
b585	0	Experiment 14	Stack_col_14_15.tif	243.2889	0	1	1	1	0.85751295	19.917904
b586	0	Experiment 14	Stack_col_14_15.tif	240.6789	1	1	1	1	0.4254001	53.738655
b587	0	Experiment 14	Stack_col_14_15.tif	240.83333	0	1	1	1	0.77905947	28.317005
b588	0	Experiment 14	Stack_col_14_15.tif	243.23189	1	1	1	1	0.8722689	32.00682
b589	0	Experiment 14	Stack_col_14_15.tif	242.42	1	1	1	1	0.43763185	46.488438
b590	0	Experiment 14	Stack_col_14_15.tif	242.53847	0	1	1	1	0.9170732	22.26321
b591	0	Experiment 14	Stack_col_14_15.tif	243.98518	0	1	1	1	0.44773662	66.013954
b592	0	Experiment 14	Stack_col_14_15.tif	243.44444	0	1	1	1	0.79441625	22.29683
b593	0	Experiment 14	Stack_col_14_15.tif	240.65079	0	1	1	1	0.93789476	25.624056
b594	0	Experiment 14	Stack_col_14_15.tif	243.15555	1	1	1	1	0.93895346	19.397053
b595	0	Experiment 14	Stack_col_14_15.tif	244.15384	0	1	1	1	0.9119497	18.363127
b596	0	Experiment 14	Stack_col_14_15.tif	243.72464	1	1	1	1	0.5222222	31.624786
b597	0	Experiment 14	Stack_col_14_15.tif	241.95653	0	1	1	1	0.7765958	31.392126
b598	0	Experiment 14	Stack_col_14_15.tif	232.71794	0	1	1	1	0.8375796	18.51564
b599	0	Experiment 14	Stack_col_14_15.tif	239.24243	0	1	1	1	0.9117647	14.627808
b600	0	Experiment 14	Stack_col_14_15.tif	237.45238	0	1	1	1	0.9275862	18.039766
b601	0	Experiment 14	Stack_col_14_15.tif	240.6	1	1	1	1	0.9020173	19.720718
b602	0	Experiment 14	Stack_col_14_15.tif	240.01819	1	1	1	1	0.91549295	23.65121
b603	0	Experiment 14	Stack_col_14_15.tif	239.14516	1	1	1	1	0.6834586	29.13369
b604	0	Experiment 14	Stack_col_14_15.tif	241.04688	0	1	1	1	0.6565517	30.511227
b605	0	Experiment 14	Stack_col_14_15.tif	239.62791	0	1	1	1	0.6612022	41.315983
b606	0	Experiment 14	Stack_col_14_15.tif	241.13208	0	1	1	1	0.7627119	25.976986
b607	0	Experiment 14	Stack_col_14_15.tif	243.22223	0	1	1	1	0.82335764	41.38689
b608	0	Experiment 14	Stack_col_14_15.tif	243.75	0	1	1	1	0.98355263	13.717138
b609	0	Experiment 14	Stack_col_14_15.tif	241.60194	0	1	1	1	0.5161078	47.88414
b610	0	Experiment 14	Stack_col_14_15.tif	232.5	0	1	1	1	0.65198237	20.26608
b611	0	Experiment 14	Stack_col_14_15.tif	243.92157	0	1	1	1	0.67157316	22.858513
b612	0	Experiment 14	Stack_col_14_15.tif	243.59459	0	1	1	1	0.83713853	18.749704
b613	0	Experiment 14	Stack_col_14_15.tif	241.07692	0	1	1	1	0.82131904	16.992426
b614	0	Experiment 14	Stack_col_14_15.tif	241.31111	0	1	1	1	0.9132948	19.111612
b615	0	Experiment 14	Stack_col_14_15.tif	239.98112	0	1	1	1	0.6497373	22.535324
b616	0	Experiment 14	Stack_col_14_15.tif	243.34782	0	1	1	1	0.7855505	21.775831
b617	0	Experiment 14	Stack_col_14_15.tif	241.48148	0	1	1	1	0.9845758	13.274979
b618	0	Experiment 14	Stack_col_14_15.tif	245.1	0	1	1	1	0.8742331	17.171574
b619	0	Experiment 14	Stack_col_14_15.tif	242.87097	0	1	1	1	0.91855204	18.232738
b620	0	Experiment 14	Stack_col_14_15.tif	243.07143	0	1	1	1	0.6698113	28.114353
b621	0	Experiment 14	Stack_col_14_15.tif	241.18965	0	1	1	1	0.85714287	27.673927
b622	0	Experiment 14	Stack_col_14_15.tif	242.86586	0	1	1	1	0.53744113	38.15766
b623	0	Experiment 14	Stack_col_14_15.tif	246.3077	1	1	1	1	0.87609076	29.081192
b624	0	Experiment 14	Stack_col_14_15.tif	242.69354	0	1	1	1	0.8478058	28.250664
b625	0	Experiment 14	Stack_col_14_15.tif	245.075	0	1	1	1	0.85216177	18.821066
b626	0	Experiment 14	Stack_col_14_15.tif	243.04109	1	1	1	1	0.64109904	36.141167
b627	0	Experiment 14	Stack_col_14_15.tif	240.28947	0	1	1	1	0.8926746	16.499664
b628	0	Experiment 14	Stack_col_14_15.tif	238.03703	0	1	1	1	0.9283668	13.345416
b629	0	Experiment 14	Stack_col_14_15.tif	240.68965	0	1	1	1	0.98540145	14.90769
b630	0	Experiment 14	Stack_col_14_15.tif	241.44681	0	1	1	1	0.66569203	21.480711
b631	0	Experiment 14	Stack_col_14_15.tif	241.45714	0	1	1	1	0.8281787	15.181812
b632	0	Experiment 14	Stack_col_14_15.tif	241.05495	1	1	1	1	0.64962476	41.884644
b633	0	Experiment 14	Stack_col_14_15.tif	244.1132	1	1	1	1	0.8069255	21.778399
b634	0	Experiment 14	Stack_col_14_15.tif	242.64706	0	1	1	1	0.8617143	24.445803
b635	0	Experiment 14	Stack_col_14_15.tif	243.13792	0	1	1	1	0.9620853	12.799556
b636	0	Experiment 14	Stack_col_14_15.tif	241.45238	0	1	1	1	0.9222222	17.020452
b637	0	Experiment 14	Stack_col_14_15.tif	241.82979	0	1	1	1	0.9302326	21.474754
b638	0	Experiment 14	Stack_col_14_15.tif	243.0	0	1	1	1	0.88309634	33.017326
b639	0	Experiment 14	Stack_col_14_15.tif	241.2069	1	1	1	1	0.94209355	24.62989
b640	0	Experiment 14	Stack_col_14_15.tif	235.97333	1	1	1	1	0.45881864	34.105515
b641	0	Experiment 14	Stack_col_14_15.tif	239.15625	0	1	1	1	0.9115226	14.810813
b642	0	Experiment 14	Stack_col_14_15.tif	241.07843	0	1	1	1	0.86744183	22.168816
b643	0	Experiment 14	Stack_col_14_15.tif	243.36	0	1	1	1	0.8498789	14.725415
b644	0	Experiment 14	Stack_col_14_15.tif	242.14285	1	1	1	1	0.70493686	36.69955
b645	0	Experiment 14	Stack_col_14_15.tif	242.35715	1	1	1	1	0.64396286	37.535477
b646	0	Experiment 14	Stack_col_14_15.tif	243.80263	1	1	1	1	0.775766	33.831444
b647	0	Experiment 14	Stack_col_14_15.tif	240.27869	0	1	1	1	0.6349671	30.31822
b648	0	Experiment 14	Stack_col_14_15.tif	243.0	0	1	1	1	0.93174434	25.326258
b649	0	Experiment 14	Stack_col_14_15.tif	242.0	1	1	1	1	0.5301508	31.142658
b650	0	Experiment 14	Stack_col_14_15.tif	244.31818	1	1	1	1	0.86243385	20.377035
b651	0	Experiment 14	Stack_col_14_15.tif	239.48276	0	1	1	1	0.8981481	15.645218
b652	0	Experiment 14	Stack_col_14_15.tif	244.90625	0	1	1	1	0.8314799	29.343468
b653	0	Experiment 14	Stack_col_14_15.tif	239.9804	0	1	1	1	0.9280397	22.38197
b654	0	Experiment 14	Stack_col_14_15.tif	244.78082	0	1	1	1	0.82348484	35.56602
b655	0	Experiment 14	Stack_col_14_15.tif	241.10146	1	1	1	1	0.74981606	32.755596
b656	0	Experiment 14	Stack_col_14_15.tif	241.15152	0	1	1	1	0.79801327	20.414835
b657	0	Experiment 14	Stack_col_14_15.tif	244.35849	0	1	1	1	0.8775744	23.195807
b658	0	Experiment 14	Stack_col_14_15.tif	244.75	0	1	1	1	0.7969925	24.986391
b659	0	Experiment 14	Stack_col_14_15.tif	241.72728	0	1	1	1	0.9735099	14.239134
b660	0	Experiment 14	Stack_col_14_15.tif	242.09091	0	1	1	1	0.9113924	23.740385
b661	0	Experiment 14	Stack_col_14_15.tif	239.17241	0	1	1	1	0.92537314	12.370276
b662	0	Experiment 14	Stack_col_14_15.tif	242.84782	0	1	1	1	0.64772725	20.959139
b663	0	Experiment 14	Stack_col_14_15.tif	243.8169	0	1	1	1	0.71877134	34.301476
b664	0	Experiment 14	Stack_col_14_15.tif	240.25	0	1	1	1	0.83601284	20.118324
b665	0	Experiment 14	Stack_col_14_15.tif	240.01428	1	1	1	1	0.45807034	31.119312
b666	0	Experiment 14	Stack_col_14_15.tif	242.77777	0	1	1	1	0.9513109	15.595068
b667	0	Experiment 14	Stack_col_14_15.tif	242.35385	0	1	1	1	0.8028962	28.64372
b668	0	Experiment 14	Stack_col_14_15.tif	239.34737	0	1	1	1	0.343184	43.152855
b669	0	Experiment 14	Stack_col_14_15.tif	239.2745	0	1	1	1	0.93481094	22.498438
b670	0	Experiment 14	Stack_col_14_15.tif	240.6207	1	1	1	1	0.74898785	34.763058
b671	0	Experiment 14	Stack_col_14_15.tif	242.44827	0	1	1	1	0.85188866	25.799099
b672	0	Experiment 14	Stack_col_14_15.tif	239.15218	0	1	1	1	0.9241573	20.919052
b673	0	Experiment 14	Stack_col_14_15.tif	242.79591	0	1	1	1	0.79545456	20.828524
b674	0	Experiment 14	Stack_col_14_15.tif	243.64151	0	1	1	1	0.8488889	22.972477
b675	0	Experiment 14	Stack_col_14_15.tif	241.61627	1	1	1	1	0.7830882	37.842484
b676	0	Experiment 14	Stack_col_14_15.tif	239.81429	1	1	1	1	0.75164837	30.957813
b677	0	Experiment 14	Stack_col_14_15.tif	238.87302	0	1	1	1	0.7522784	26.489101
b678	0	Experiment 14	Stack_col_14_15.tif	240.63333	0	1	1	1	0.9508197	13.192472
b679	0	Experiment 14	Stack_col_14_15.tif	234.80487	0	1	1	1	0.8435583	17.837358
b680	0	Experiment 14	Stack_col_14_15.tif	238.41026	0	1	1	1	0.8575624	16.928629
b681	0	Experiment 14	Stack_col_14_15.tif	245.07272	1	1	1	1	0.7983539	23.565664
b682	0	Experiment 14	Stack_col_14_15.tif	238.59036	0	1	1	1	0.49328062	41.633312
b683	0	Experiment 14	Stack_col_14_15.tif	244.19672	0	1	1	1	0.73344105	27.60938
b684	0	Experiment 14	Stack_col_14_15.tif	240.48276	0	1	1	1	0.8102467	25.687452
b685	0	Experiment 14	Stack_col_14_15.tif	241.82222	0	1	1	1	0.8835979	20.775463
b686	0	Experiment 14	Stack_col_14_15.tif	240.45161	0	1	1	1	0.6815562	32.520073
b687	0	Experiment 14	Stack_col_14_15.tif	243.28572	0	1	1	1	0.9351433	17.735893
b688	0	Experiment 14	Stack_col_14_15.tif	239.86	0	1	1	1	0.82222223	21.657864
b689	0	Experiment 14	Stack_col_14_15.tif	242.25533	0	1	1	1	0.93957704	18.671778
b690	0	Experiment 14	Stack_col_14_15.tif	240.48193	1	1	1	1	0.5159967	36.801586
b691	0	Experiment 14	Stack_col_14_15.tif	240.42308	1	1	1	1	0.9076517	14.843392
b692	0	Experiment 14	Stack_col_14_15.tif	237.65384	0	1	1	1	0.7611336	23.742043
b693	0	Experiment 14	Stack_col_14_15.tif	239.10811	0	1	1	1	0.91333336	18.09049
b694	0	Experiment 14	Stack_col_14_15.tif	243.97368	1	1	1	1	0.948542	16.24046
b695	0	Experiment 14	Stack_col_14_15.tif	240.69565	0	1	1	1	0.9237537	19.782286
b696	0	Experiment 14	Stack_col_14_15.tif	234.64516	0	1	1	1	0.80737704	13.051595
b697	0	Experiment 14	Stack_col_14_15.tif	240.89131	0	1	1	1	0.954955	19.354229
b698	0	Experiment 14	Stack_col_14_15.tif	241.10448	0	1	1	1	0.46737045	29.704174
b699	0	Experiment 14	Stack_col_14_15.tif	248.30435	0	1	1	1	0.994302	20.487537
b700	0	Experiment 14	Stack_col_14_15.tif	238.0	0	1	1	1	0.880109	20.304676
b701	0	Experiment 14	Stack_col_14_15.tif	242.5303	0	1	1	1	0.89272726	30.37561
b702	0	Experiment 14	Stack_col_14_15.tif	241.71053	0	1	1	1	0.834375	15.91371
b703	0	Experiment 14	Stack_col_14_15.tif	245.06061	0	1	1	1	0.9613035	16.342604
b704	0	Experiment 14	Stack_col_14_15.tif	243.17143	0	1	1	1	0.97540987	14.205236
b705	0	Experiment 14	Stack_col_14_15.tif	242.71642	0	1	1	1	0.90403587	26.705315
b706	0	Experiment 14	Stack_col_14_15.tif	242.36842	0	1	1	1	0.8688866	25.030287
b707	0	Experiment 14	Stack_col_14_15.tif	233.35088	0	1	1	1	0.8448099	26.954895
b708	0	Experiment 14	Stack_col_14_15.tif	244.16129	1	1	1	1	0.8975332	28.397394
b709	0	Experiment 14	Stack_col_14_15.tif	241.92308	0	1	1	1	0.8238806	17.766039
b710	0	Experiment 14	Stack_col_14_15.tif	240.44118	1	1	1	1	0.55542725	32.401726
b712	0	Experiment 14	Stack_col_14_15.tif	240.03636	1	1	1	1	0.7564612	23.454596
b715	0	Experiment 14	Stack_col_14_15.tif	242.86363	1	1	1	1	0.9725191	19.173275
b718	0	Experiment 14	Stack_col_14_15.tif	236.77777	0	1	1	1	0.9907407	7.684968
b729	0	Experiment 14	Stack_col_14_15.tif	242.29411	0	1	2	1	0.96256196	19.954803
b730	0	Experiment 14	Stack_col_14_15.tif	241.45714	0	1	2	1	0.8850969	15.920085
b731	0	Experiment 14	Stack_col_14_15.tif	240.0	0	1	2	1	0.6810431	16.734396
b732	0	Experiment 14	Stack_col_14_15.tif	239.51376	0	1	2	1	0.34627524	47.97371
b733	0	Experiment 14	Stack_col_14_15.tif	241.29411	1	1	2	1	0.71069765	31.8622
b734	0	Experiment 14	Stack_col_14_15.tif	245.38298	0	1	2	1	0.65874904	21.35589
b735	0	Experiment 14	Stack_col_14_15.tif	237.02272	0	1	2	1	0.65827096	21.465782
b736	0	Experiment 14	Stack_col_14_15.tif	238.80556	0	1	2	1	0.7804058	18.323715
b737	0	Experiment 14	Stack_col_14_15.tif	234.98529	1	1	2	1	0.2327982	61.02209
b738	0	Experiment 14	Stack_col_14_15.tif	242.48387	0	1	2	1	0.6008451	27.966837
b739	0	Experiment 14	Stack_col_14_15.tif	242.66	0	1	2	1	0.78942424	22.017044
b740	0	Experiment 14	Stack_col_14_15.tif	240.8169	0	1	2	1	0.9170451	30.891777
b741	0	Experiment 14	Stack_col_14_15.tif	242.24286	1	1	2	1	0.5679455	33.49889
b742	0	Experiment 14	Stack_col_14_15.tif	235.66667	0	1	2	1	0.910301	22.943077
b743	0	Experiment 14	Stack_col_14_15.tif	242.75	0	1	2	1	0.88294077	23.174526
b744	0	Experiment 14	Stack_col_14_15.tif	242.31885	1	1	2	1	0.51685345	64.65307
b745	0	Experiment 14	Stack_col_14_15.tif	241.28	0	1	2	1	0.7654637	34.851486
b746	0	Experiment 14	Stack_col_14_15.tif	242.69812	0	1	2	1	0.807867	25.519978
b747	0	Experiment 14	Stack_col_14_15.tif	244.48648	0	1	2	1	0.81241506	16.649033
b748	0	Experiment 14	Stack_col_14_15.tif	241.32608	0	1	2	1	0.7136662	21.704807
b749	0	Experiment 14	Stack_col_14_15.tif	243.58333	0	1	2	1	0.95366037	20.595482
b750	0	Experiment 14	Stack_col_14_15.tif	241.38571	1	1	2	1	0.732697	33.196354
b751	0	Experiment 14	Stack_col_14_15.tif	244.0	0	1	2	1	0.8439156	21.511528
b752	0	Experiment 14	Stack_col_14_15.tif	242.85417	0	1	2	1	0.6537847	21.042168
b753	0	Experiment 14	Stack_col_14_15.tif	243.28572	1	1	2	1	0.5967588	35.93307
b754	0	Experiment 14	Stack_col_14_15.tif	244.25	0	1	2	1	0.70779663	21.277515
b755	0	Experiment 14	Stack_col_14_15.tif	240.87325	0	1	2	1	0.46982807	33.18913
b756	0	Experiment 14	Stack_col_14_15.tif	244.87234	0	1	2	1	0.8924249	21.323702
b757	0	Experiment 14	Stack_col_14_15.tif	242.73914	0	1	2	1	0.51297444	43.17346
b758	0	Experiment 14	Stack_col_14_15.tif	239.20454	0	1	2	1	0.79216594	19.009077
b759	0	Experiment 14	Stack_col_14_15.tif	241.04082	0	1	2	1	0.92294073	21.49784
b760	0	Experiment 14	Stack_col_14_15.tif	242.85715	0	1	2	1	0.78259575	17.819096
b761	0	Experiment 14	Stack_col_14_15.tif	242.33846	0	1	2	1	0.7347358	29.221317
b762	0	Experiment 14	Stack_col_14_15.tif	241.61702	0	1	2	1	0.9625977	21.023628
b763	0	Experiment 14	Stack_col_14_15.tif	243.57895	0	1	2	1	0.75762135	27.063868
b764	0	Experiment 14	Stack_col_14_15.tif	241.28572	0	1	2	1	0.8213902	18.476568
b765	0	Experiment 14	Stack_col_14_15.tif	244.30986	0	1	2	1	0.91271555	31.600851
b766	0	Experiment 14	Stack_col_14_15.tif	238.61702	0	1	2	1	0.9161818	18.684305
b767	0	Experiment 14	Stack_col_14_15.tif	242.25581	0	1	2	1	0.9714399	19.156643
b768	0	Experiment 14	Stack_col_14_15.tif	241.2653	0	1	2	1	0.74725366	23.35369
b769	0	Experiment 14	Stack_col_14_15.tif	242.17392	1	1	2	1	0.7636318	32.16972
b770	0	Experiment 14	Stack_col_14_15.tif	240.63235	1	1	2	1	0.43159002	35.379642
b771	0	Experiment 14	Stack_col_14_15.tif	245.38889	0	1	2	1	0.95605135	17.063011
b772	0	Experiment 14	Stack_col_14_15.tif	240.89285	1	1	2	1	0.7588644	24.56731
b773	0	Experiment 14	Stack_col_14_15.tif	228.76596	0	1	2	1	0.9342543	17.803507
b774	0	Experiment 14	Stack_col_14_15.tif	241.61765	0	1	2	1	0.7098757	31.262838
b775	0	Experiment 14	Stack_col_14_15.tif	237.46	0	1	2	1	0.8633982	18.084898
b776	0	Experiment 14	Stack_col_14_15.tif	245.54054	0	1	2	1	0.8954704	17.179653
b777	0	Experiment 14	Stack_col_14_15.tif	243.11429	0	1	2	1	0.92110175	16.707247
b778	0	Experiment 14	Stack_col_14_15.tif	243.90475	0	1	2	1	0.9710109	18.503944
b779	0	Experiment 14	Stack_col_14_15.tif	240.69388	0	1	2	1	0.8319173	22.59588
b780	0	Experiment 14	Stack_col_14_15.tif	232.0	0	1	2	1	0.84731495	28.995787
b781	0	Experiment 14	Stack_col_14_15.tif	240.97058	1	1	2	1	0.4635579	46.548267
b782	0	Experiment 14	Stack_col_14_15.tif	244.87273	0	1	2	1	0.9060326	23.931644
b783	0	Experiment 14	Stack_col_14_15.tif	230.93478	0	1	2	1	0.97857684	18.958624
b784	0	Experiment 14	Stack_col_14_15.tif	245.04878	0	1	2	1	0.8069095	17.499115
b785	0	Experiment 14	Stack_col_14_15.tif	244.2371	1	1	2	1	0.61377734	44.31965
b786	0	Experiment 14	Stack_col_14_15.tif	231.2807	0	1	2	1	0.7765076	24.353008
b787	0	Experiment 14	Stack_col_14_15.tif	237.43661	0	1	2	1	0.48317444	32.655933
b788	0	Experiment 14	Stack_col_14_15.tif	240.09435	1	1	2	1	0.7948178	23.88581
b789	0	Experiment 14	Stack_col_14_15.tif	240.84906	1	1	2	1	0.86967593	24.213066
b790	0	Experiment 14	Stack_col_14_15.tif	243.38983	1	1	2	1	0.71014637	28.807957
b791	0	Experiment 14	Stack_col_14_15.tif	242.23529	0	1	2	1	0.93365943	22.324793
b792	0	Experiment 14	Stack_col_14_15.tif	242.55	0	1	2	1	0.42949772	66.297745
b793	0	Experiment 14	Stack_col_14_15.tif	237.26923	1	1	2	1	0.85526067	36.201504
b794	0	Experiment 14	Stack_col_14_15.tif	235.48276	1	1	2	1	0.7492861	38.11779
b795	0	Experiment 14	Stack_col_14_15.tif	245.76315	0	1	2	1	0.7145242	16.539124
b796	0	Experiment 14	Stack_col_14_15.tif	239.93814	0	1	2	1	0.30200854	47.761963
b797	0	Experiment 14	Stack_col_14_15.tif	238.33333	0	1	2	1	0.72334623	24.124514
b798	0	Experiment 14	Stack_col_14_15.tif	229.725	0	1	2	1	0.9473931	16.025623
b799	0	Experiment 14	Stack_col_14_15.tif	235.36842	0	1	2	1	0.94954723	17.437077
b800	0	Experiment 14	Stack_col_14_15.tif	238.76923	0	1	2	1	0.8499351	22.414871
b801	0	Experiment 14	Stack_col_14_15.tif	231.77272	0	1	2	1	0.95730984	18.8284
b802	0	Experiment 14	Stack_col_14_15.tif	234.19608	0	1	2	1	0.7832314	21.960571
b803	0	Experiment 14	Stack_col_14_15.tif	241.51724	1	1	2	1	0.5377988	41.511047
b804	0	Experiment 14	Stack_col_14_15.tif	241.65117	0	1	2	1	0.9299018	21.372911
b805	0	Experiment 14	Stack_col_14_15.tif	240.73016	0	1	2	1	0.7283866	29.226465
b806	0	Experiment 14	Stack_col_14_15.tif	242.91112	0	1	2	1	0.85997874	18.519539
b807	0	Experiment 14	Stack_col_14_15.tif	242.85715	0	1	2	1	0.54447687	26.01678
b808	0	Experiment 14	Stack_col_14_15.tif	233.44615	0	1	2	1	0.6496986	28.340445
b809	0	Experiment 14	Stack_col_14_15.tif	240.2	0	1	2	1	0.9533074	15.122306
b810	0	Experiment 14	Stack_col_14_15.tif	171.36734	0	1	2	1	0.50840425	84.58345
b811	0	Experiment 14	Stack_col_14_15.tif	232.7	1	1	2	1	0.6083173	30.227192
b812	0	Experiment 14	Stack_col_14_15.tif	234.17741	0	1	2	1	0.61466134	29.809671
b813	0	Experiment 14	Stack_col_14_15.tif	232.86111	0	1	2	1	0.9141238	31.057552
b814	0	Experiment 14	Stack_col_14_15.tif	240.41379	0	1	2	1	0.4671472	26.22298
b815	0	Experiment 14	Stack_col_14_15.tif	240.34	1	1	2	1	0.6202982	70.10023
b816	0	Experiment 14	Stack_col_14_15.tif	242.2653	1	1	2	1	0.51881355	49.286148
b817	0	Experiment 14	Stack_col_14_15.tif	239.73685	1	1	2	1	0.5699456	35.254505
b818	0	Experiment 14	Stack_col_14_15.tif	236.07353	1	1	2	1	0.8001589	33.018734
b819	0	Experiment 14	Stack_col_14_15.tif	231.61111	0	1	2	1	0.95935345	16.649643
b820	0	Experiment 14	Stack_col_14_15.tif	243.16216	1	1	2	1	0.95152605	14.801079
b821	0	Experiment 14	Stack_col_14_15.tif	241.37837	0	1	2	1	0.9466067	18.103947
b822	0	Experiment 14	Stack_col_14_15.tif	242.08109	0	1	2	1	0.90996504	16.34031
b823	0	Experiment 14	Stack_col_14_15.tif	241.81818	0	1	2	1	0.9509346	15.633271
b824	0	Experiment 14	Stack_col_14_15.tif	240.29897	1	1	2	1	0.42652026	45.076454
b825	0	Experiment 14	Stack_col_14_15.tif	246.5	0	1	2	1	0.96626055	15.876963
b826	0	Experiment 14	Stack_col_14_15.tif	244.21666	0	1	2	1	0.839627	28.682478
b827	0	Experiment 14	Stack_col_14_15.tif	232.12222	1	1	2	1	0.5844863	45.556484
b828	0	Experiment 14	Stack_col_14_15.tif	241.39682	0	1	2	1	0.70592797	28.212683
b829	0	Experiment 14	Stack_col_14_15.tif	240.40678	0	1	2	1	0.96057945	26.190588
b830	0	Experiment 14	Stack_col_14_15.tif	237.875	0	1	2	1	0.9442149	16.85301
b831	0	Experiment 14	Stack_col_14_15.tif	241.97531	0	1	2	1	0.7361651	36.027702
b832	0	Experiment 14	Stack_col_14_15.tif	243.28125	0	1	2	1	0.8974668	14.407604
b833	0	Experiment 14	Stack_col_14_15.tif	240.60655	1	1	2	1	0.9091504	28.589058
b834	0	Experiment 14	Stack_col_14_15.tif	242.27272	1	1	2	1	0.7794132	28.960102
b835	0	Experiment 14	Stack_col_14_15.tif	228.85454	0	1	2	1	0.7212927	25.185144
b836	0	Experiment 14	Stack_col_14_15.tif	230.81482	0	1	2	1	0.80881846	34.1977
b837	0	Experiment 14	Stack_col_14_15.tif	241.53572	0	1	2	1	0.89884233	26.050066
b838	0	Experiment 14	Stack_col_14_15.tif	229.38637	0	1	2	1	0.849866	23.408249
b839	0	Experiment 14	Stack_col_14_15.tif	232.05882	0	1	2	1	0.82065064	22.878654
b840	0	Experiment 14	Stack_col_14_15.tif	241.02913	0	1	2	1	0.43425575	49.08792
b841	0	Experiment 14	Stack_col_14_15.tif	242.54839	0	1	2	1	0.8375	19.94857
b842	0	Experiment 14	Stack_col_14_15.tif	243.48781	0	1	2	1	0.94337064	17.408045
b843	0	Experiment 14	Stack_col_14_15.tif	244.03334	0	1	2	1	0.96983624	13.759831
b844	0	Experiment 14	Stack_col_14_15.tif	240.49019	0	1	2	1	0.7701271	22.736095
b845	0	Experiment 14	Stack_col_14_15.tif	233.36171	0	1	2	1	0.9142073	20.530039
b846	0	Experiment 14	Stack_col_14_15.tif	234.45714	0	1	2	1	0.9043789	16.57539
b847	0	Experiment 14	Stack_col_14_15.tif	248.71875	0	1	2	1	0.93602514	14.016078
b848	0	Experiment 14	Stack_col_14_15.tif	243.54286	0	1	2	1	0.7794619	30.436586
b849	0	Experiment 14	Stack_col_14_15.tif	242.31482	0	1	2	1	0.8040377	24.161686
b850	0	Experiment 14	Stack_col_14_15.tif	242.78847	0	1	2	1	0.82854766	22.87606
b851	0	Experiment 14	Stack_col_14_15.tif	242.16924	1	1	2	1	0.70082706	29.1225
b852	0	Experiment 14	Stack_col_14_15.tif	236.09677	1	1	2	1	0.513597	27.313791
b853	0	Experiment 14	Stack_col_14_15.tif	243.71698	0	1	2	1	0.897407	23.810358
b854	0	Experiment 14	Stack_col_14_15.tif	243.33333	0	1	2	1	0.90697676	11.957976
b855	0	Experiment 14	Stack_col_14_15.tif	240.94339	0	1	2	1	0.7305419	23.57354
b856	0	Experiment 14	Stack_col_14_15.tif	243.22223	0	1	2	1	0.8224466	21.926098
b857	0	Experiment 14	Stack_col_14_15.tif	242.14706	0	1	2	1	0.82412916	16.653547
b858	0	Experiment 14	Stack_col_14_15.tif	244.06667	0	1	2	1	0.85943973	22.019972
b859	0	Experiment 14	Stack_col_14_15.tif	230.40984	0	1	2	1	0.85447395	26.860645
b860	0	Experiment 14	Stack_col_14_15.tif	244.36586	0	1	2	1	0.7856636	17.297487
b861	0	Experiment 14	Stack_col_14_15.tif	239.8	0	1	2	1	0.86241007	14.333535
b862	0	Experiment 14	Stack_col_14_15.tif	243.09525	0	1	2	1	0.9073936	19.089556
b863	0	Experiment 14	Stack_col_14_15.tif	241.18965	1	1	2	1	0.86230177	25.798033
b864	0	Experiment 14	Stack_col_14_15.tif	238.15294	0	1	2	1	0.39960176	38.390694
b865	0	Experiment 14	Stack_col_14_15.tif	241.43549	1	1	2	1	0.60497993	33.37465
b866	0	Experiment 14	Stack_col_14_15.tif	242.54054	0	1	2	1	0.86431956	19.967218
b867	0	Experiment 14	Stack_col_14_15.tif	239.7451	0	1	2	1	0.79615384	23.216772
b868	0	Experiment 14	Stack_col_14_15.tif	233.76471	0	1	2	1	0.9407979	22.955599
b869	0	Experiment 14	Stack_col_14_15.tif	242.20895	1	1	2	1	0.601156	35.49311
b870	0	Experiment 14	Stack_col_14_15.tif	232.94118	1	1	2	1	0.6689564	38.423214
b871	0	Experiment 14	Stack_col_14_15.tif	232.20547	1	1	2	1	0.8600059	33.74542
b872	0	Experiment 14	Stack_col_14_15.tif	240.42308	0	1	2	1	0.8868608	22.681725
b873	0	Experiment 14	Stack_col_14_15.tif	242.4045	1	1	2	1	0.7242507	45.03496
b874	0	Experiment 14	Stack_col_14_15.tif	232.82692	0	1	2	1	0.6222027	23.699718
b875	0	Experiment 14	Stack_col_14_15.tif	242.22449	0	1	2	1	0.62015504	64.88453
b876	0	Experiment 14	Stack_col_14_15.tif	241.05263	1	1	2	1	0.5068342	35.91846
b877	0	Experiment 14	Stack_col_14_15.tif	232.97826	0	1	2	1	0.9093146	21.444588
b878	0	Experiment 14	Stack_col_14_15.tif	243.46666	0	1	2	1	0.7965739	30.675278
b879	0	Experiment 14	Stack_col_14_15.tif	241.66216	1	1	2	1	0.55419123	34.067825
b880	0	Experiment 14	Stack_col_14_15.tif	243.04878	0	1	2	1	0.93001986	19.41733
b881	0	Experiment 14	Stack_col_14_15.tif	245.74158	1	1	2	1	0.5922078	44.022118
b882	0	Experiment 14	Stack_col_14_15.tif	240.38	0	1	2	1	0.7748603	22.604368
b883	0	Experiment 14	Stack_col_14_15.tif	243.31667	0	1	2	1	0.7283049	29.36982
b884	0	Experiment 14	Stack_col_14_15.tif	231.69643	0	1	2	1	0.8955056	24.31426
b885	0	Experiment 14	Stack_col_14_15.tif	240.225	0	1	2	1	0.85341173	17.997278
b886	0	Experiment 14	Stack_col_14_15.tif	242.53572	0	1	2	1	0.7047619	26.195114
b887	0	Experiment 14	Stack_col_14_15.tif	244.32143	0	1	2	1	0.9027128	18.395285
b888	0	Experiment 14	Stack_col_14_15.tif	245.1077	0	1	2	1	0.73101884	29.991938
b889	0	Experiment 14	Stack_col_14_15.tif	243.92308	1	1	2	1	0.67297196	29.92592
b890	0	Experiment 14	Stack_col_14_15.tif	242.22536	0	1	2	1	0.6174516	34.160316
b891	0	Experiment 14	Stack_col_14_15.tif	235.4151	0	1	2	1	0.8195905	23.450205
b892	0	Experiment 14	Stack_col_14_15.tif	245.2653	0	1	2	1	0.73968095	22.187666
b893	0	Experiment 14	Stack_col_14_15.tif	242.25	1	1	2	1	0.63548833	36.748863
b894	0	Experiment 14	Stack_col_14_15.tif	240.44186	0	1	2	1	0.8965885	18.671347
b895	0	Experiment 14	Stack_col_14_15.tif	235.137	0	1	2	1	0.6652757	31.980915
b896	0	Experiment 14	Stack_col_14_15.tif	240.02325	0	1	2	1	0.9678501	19.371756
b897	0	Experiment 14	Stack_col_14_15.tif	239.50877	0	1	2	1	0.7821587	25.073122
b898	0	Experiment 14	Stack_col_14_15.tif	233.75862	0	1	2	1	0.44598722	24.763231
b899	0	Experiment 14	Stack_col_14_15.tif	241.02325	0	1	2	1	0.9083694	17.50893
b900	0	Experiment 14	Stack_col_14_15.tif	234.39473	1	1	2	1	0.98088706	15.949695
b901	0	Experiment 14	Stack_col_14_15.tif	239.72728	0	1	2	1	0.9744361	20.912458
b902	0	Experiment 14	Stack_col_14_15.tif	232.57143	0	1	2	1	0.3860457	30.17902
b903	0	Experiment 14	Stack_col_14_15.tif	242.18182	0	1	2	1	0.63393754	19.727123
b904	0	Experiment 14	Stack_col_14_15.tif	242.88889	0	1	2	1	0.6690387	22.902935
b905	0	Experiment 14	Stack_col_14_15.tif	242.20512	0	1	2	1	0.9728353	19.427881
b906	0	Experiment 14	Stack_col_14_15.tif	243.46031	1	1	2	1	0.95003146	30.48567
b907	0	Experiment 14	Stack_col_14_15.tif	242.0	0	1	2	1	0.6745964	25.452312
b908	0	Experiment 14	Stack_col_14_15.tif	240.64935	0	1	2	1	0.6457399	35.26696
b909	0	Experiment 14	Stack_col_14_15.tif	242.42683	0	1	2	1	0.6026393	35.634678
b910	0	Experiment 14	Stack_col_14_15.tif	240.02919	1	1	2	1	0.47038007	71.67167
b911	0	Experiment 14	Stack_col_14_15.tif	233.15909	0	1	2	1	0.90800744	17.806005
b912	0	Experiment 14	Stack_col_14_15.tif	244.76923	0	1	2	1	0.9146119	29.582134
b913	0	Experiment 14	Stack_col_14_15.tif	234.5	0	1	2	1	0.9774536	12.665309
b914	0	Experiment 14	Stack_col_14_15.tif	238.78847	1	1	2	1	0.27218616	45.361
b915	0	Experiment 14	Stack_col_14_15.tif	243.23077	0	1	2	1	0.8244258	18.652147
b916	0	Experiment 14	Stack_col_14_15.tif	234.7347	0	1	2	1	0.91221607	23.45302
b918	0	Experiment 14	Stack_col_14_15.tif	240.69841	0	1	2	1	0.69305813	29.360064
b919	0	Experiment 14	Stack_col_14_15.tif	239.0	0	1	2	1	0.89818656	16.222435
b920	0	Experiment 14	Stack_col_14_15.tif	239.7971	1	1	2	1	0.6737256	31.786472
b921	0	Experiment 14	Stack_col_14_15.tif	242.34285	0	1	2	1	0.82505184	30.898071
b922	0	Experiment 14	Stack_col_14_15.tif	236.36923	0	1	2	1	0.6013052	32.4153
b923	0	Experiment 14	Stack_col_14_15.tif	242.58621	1	1	2	1	0.6226557	26.466835
b924	0	Experiment 14	Stack_col_14_15.tif	242.12329	0	1	2	1	0.65830487	32.17613
b925	0	Experiment 14	Stack_col_14_15.tif	238.0	0	1	2	1	0.5339445	31.822266
b926	0	Experiment 14	Stack_col_14_15.tif	242.82692	0	1	2	1	0.844432	24.97111
b927	0	Experiment 14	Stack_col_14_15.tif	243.42105	0	1	2	1	0.7161138	34.41539
b928	0	Experiment 14	Stack_col_14_15.tif	236.93024	0	1	2	1	0.8937921	19.269688
b929	0	Experiment 14	Stack_col_14_15.tif	241.46875	0	1	2	1	0.9020323	14.010943
b930	0	Experiment 14	Stack_col_14_15.tif	240.74193	0	1	2	1	0.9376232	13.693847
b931	0	Experiment 14	Stack_col_14_15.tif	241.78688	1	1	2	1	0.64843744	26.145767
b932	0	Experiment 14	Stack_col_14_15.tif	238.34921	0	1	2	1	0.5532491	28.325705
b933	0	Experiment 14	Stack_col_14_15.tif	244.34782	0	1	2	1	0.81162447	21.129301
b934	0	Experiment 14	Stack_col_14_15.tif	240.90826	0	1	2	1	0.3956334	48.39608
b935	0	Experiment 14	Stack_col_14_15.tif	243.52055	1	1	2	1	0.49723542	40.056213
b936	0	Experiment 14	Stack_col_14_15.tif	244.23256	1	1	2	1	0.9250909	17.818039
b937	0	Experiment 14	Stack_col_14_15.tif	243.2963	0	1	2	1	0.81062776	23.09639
b938	0	Experiment 14	Stack_col_14_15.tif	242.28572	0	1	2	1	0.5822287	31.81278
b939	0	Experiment 14	Stack_col_14_15.tif	241.42424	0	1	2	1	0.8721251	15.94608
b940	0	Experiment 14	Stack_col_14_15.tif	244.8	1	1	2	1	0.6468085	41.76837
b941	0	Experiment 14	Stack_col_14_15.tif	241.6	1	1	2	1	0.8598879	24.993544
b942	0	Experiment 14	Stack_col_14_15.tif	237.10345	0	1	2	1	0.9550562	11.087535
b943	0	Experiment 14	Stack_col_14_15.tif	241.27083	0	1	2	1	0.65860736	21.623558
b944	0	Experiment 14	Stack_col_14_15.tif	235.09677	0	1	2	1	0.9370494	14.030322
b945	0	Experiment 14	Stack_col_14_15.tif	240.87234	0	1	2	1	0.8204779	22.012033
b946	0	Experiment 14	Stack_col_14_15.tif	243.06897	0	1	2	1	0.7616889	39.378677
b947	0	Experiment 14	Stack_col_14_15.tif	243.88235	0	1	2	1	0.9752066	14.744003
b948	0	Experiment 14	Stack_col_14_15.tif	243.12857	1	1	2	1	0.9296394	29.018085
b949	0	Experiment 14	Stack_col_14_15.tif	238.75676	0	1	2	1	0.97322947	16.386839
b950	0	Experiment 14	Stack_col_14_15.tif	231.56897	1	1	2	1	0.7959662	27.147171
b951	0	Experiment 14	Stack_col_14_15.tif	243.5	0	1	2	1	0.9172287	22.227089
b952	0	Experiment 14	Stack_col_14_15.tif	239.77193	1	1	2	1	0.73403287	24.893871
b953	0	Experiment 14	Stack_col_14_15.tif	244.21349	1	1	2	1	0.6498573	45.49464
b954	0	Experiment 14	Stack_col_14_15.tif	242.42592	0	1	2	1	0.9063232	21.339794
b955	0	Experiment 14	Stack_col_14_15.tif	240.71428	0	1	2	1	0.78886116	28.21876
b956	0	Experiment 14	Stack_col_14_15.tif	234.61017	0	1	2	1	0.75392884	26.741138
b957	0	Experiment 14	Stack_col_14_15.tif	235.74626	0	1	2	1	0.8097234	32.378727
b958	0	Experiment 14	Stack_col_14_15.tif	238.64706	0	1	2	1	0.7766284	29.926394
b959	0	Experiment 14	Stack_col_14_15.tif	242.33963	0	1	2	1	0.66459423	23.814224
b960	0	Experiment 14	Stack_col_14_15.tif	237.84746	1	1	2	1	0.725	28.960072
b961	0	Experiment 14	Stack_col_14_15.tif	234.24692	1	1	2	1	0.71445495	34.816547
b962	0	Experiment 14	Stack_col_14_15.tif	240.01888	1	1	2	1	0.8066876	25.687286
b963	0	Experiment 14	Stack_col_14_15.tif	239.64615	0	1	2	1	0.53993565	30.116087
b964	0	Experiment 14	Stack_col_14_15.tif	240.52	1	1	2	1	0.37439778	33.00031
b965	0	Experiment 14	Stack_col_14_15.tif	241.41539	0	1	2	1	0.6402152	29.674463
b966	0	Experiment 14	Stack_col_14_15.tif	239.57895	1	1	2	1	0.7256562	27.300371
b967	0	Experiment 14	Stack_col_14_15.tif	241.02083	0	1	2	1	0.9150877	19.532793
b968	0	Experiment 14	Stack_col_14_15.tif	234.5641	1	1	2	1	0.4671157	35.45972
b969	0	Experiment 14	Stack_col_14_15.tif	241.34091	0	1	2	1	0.9701258	20.143766
b970	0	Experiment 14	Stack_col_14_15.tif	241.22772	1	1	2	1	0.33585775	45.432053
b971	0	Experiment 14	Stack_col_14_15.tif	237.94286	0	1	2	1	0.8538293	15.373361
b972	0	Experiment 14	Stack_col_14_15.tif	244.14035	1	1	2	1	0.67429024	30.721079
b973	0	Experiment 14	Stack_col_14_15.tif	242.85417	0	1	2	1	0.96581197	20.758059
b974	0	Experiment 14	Stack_col_14_15.tif	236.29507	1	1	2	1	0.64753497	25.564545
b975	0	Experiment 14	Stack_col_14_15.tif	230.70732	0	1	2	1	0.90909094	18.339994
b976	0	Experiment 14	Stack_col_14_15.tif	241.32433	1	1	2	1	0.8508104	32.46242
b977	0	Experiment 14	Stack_col_14_15.tif	242.28572	1	1	2	1	0.76033056	30.728394
b978	0	Experiment 14	Stack_col_14_15.tif	241.77272	0	1	2	1	0.8086025	22.50281
b979	0	Experiment 14	Stack_col_14_15.tif	243.86441	0	1	2	1	0.62391746	30.494164
b980	0	Experiment 14	Stack_col_14_15.tif	244.61607	0	1	2	1	0.7081223	50.76235
b981	0	Experiment 14	Stack_col_14_15.tif	241.58667	1	1	2	1	0.5729984	33.631428
b982	0	Experiment 14	Stack_col_14_15.tif	242.63637	0	1	2	1	0.9739414	13.591772
b983	0	Experiment 14	Stack_col_14_15.tif	238.48	0	1	2	1	0.6984436	28.359873
b984	0	Experiment 14	Stack_col_14_15.tif	242.42554	0	1	2	1	0.88860106	20.664286
b985	0	Experiment 14	Stack_col_14_15.tif	242.86792	0	1	2	1	0.77559054	25.951855
b986	0	Experiment 14	Stack_col_14_15.tif	240.5	0	1	2	1	0.9114094	20.889284
b987	0	Experiment 14	Stack_col_14_15.tif	245.27272	1	1	2	1	0.7836754	24.722979
b988	0	Experiment 14	Stack_col_14_15.tif	239.89743	1	1	2	1	0.9666901	16.784601
b989	0	Experiment 14	Stack_col_14_15.tif	245.13954	0	1	2	1	0.92432433	18.055292
b990	0	Experiment 14	Stack_col_14_15.tif	241.66667	0	1	2	1	0.93333334	14.167946
b992	0	Experiment 14	Stack_col_14_15.tif	238.5238	0	1	2	1	0.7855102	20.016354
b993	0	Experiment 14	Stack_col_14_15.tif	241.6207	0	1	2	1	0.9039409	11.439499
b995	0	Experiment 14	Stack_col_14_15.tif	243.61539	0	1	2	1	0.77792734	18.417442
b996	0	Experiment 14	Stack_col_14_15.tif	231.3421	0	1	2	1	0.806563	14.950239
b998	0	Experiment 14	Stack_col_14_15.tif	231.52	1	1	2	1	0.6176771	42.08355
b999	0	Experiment 14	Stack_col_14_15.tif	241.36363	0	1	2	1	0.9722222	14.934292
b1000	0	Experiment 14	Stack_col_14_15.tif	241.25	0	1	2	1	0.7411724	30.201529
b1001	0	Experiment 14	Stack_col_14_15.tif	233.78	0	1	2	1	0.65388215	22.732592
b1002	0	Experiment 14	Stack_col_14_15.tif	239.33333	0	1	2	1	0.8014269	22.078041
b1003	0	Experiment 14	Stack_col_14_15.tif	235.33333	0	1	2	1	0.52416503	64.50514
b1004	0	Experiment 14	Stack_col_14_15.tif	242.04918	1	1	2	1	0.88825876	27.368275
b1005	0	Experiment 14	Stack_col_14_15.tif	246.74419	0	1	2	1	0.998452	19.047716
b1006	0	Experiment 14	Stack_col_14_15.tif	242.94872	1	1	2	1	0.59235597	35.14218
b1007	0	Experiment 14	Stack_col_14_15.tif	244.65454	0	1	2	1	0.85132384	24.11015
b1008	0	Experiment 14	Stack_col_14_15.tif	236.74	0	1	2	1	0.73351854	22.149149
b1009	0	Experiment 14	Stack_col_14_15.tif	230.25	0	1	2	1	0.92448217	13.833952
b1011	0	Experiment 14	Stack_col_14_15.tif	230.82666	1	1	2	1	0.78597516	34.31906
b1012	0	Experiment 14	Stack_col_14_15.tif	237.95833	1	1	2	1	0.64318246	21.506668
b1013	0	Experiment 14	Stack_col_14_15.tif	243.04167	0	1	2	1	0.840138	21.28796
b1014	0	Experiment 14	Stack_col_14_15.tif	242.16	0	1	2	1	0.9075216	21.759455
b1015	0	Experiment 14	Stack_col_14_15.tif	243.05	0	1	2	1	0.98123324	16.942165
b1016	0	Experiment 14	Stack_col_14_15.tif	235.36066	1	1	2	1	0.59766966	26.543724
b1017	0	Experiment 14	Stack_col_14_15.tif	238.77272	0	1	2	1	0.773361	19.224558
b1018	0	Experiment 14	Stack_col_14_15.tif	235.87671	0	1	2	1	0.5383842	32.388233
b1019	0	Experiment 14	Stack_col_14_15.tif	242.51064	0	1	2	1	0.95607924	22.11675
b1020	0	Experiment 14	Stack_col_14_15.tif	240.42857	1	1	2	1	0.7866521	23.533445
b1021	0	Experiment 14	Stack_col_14_15.tif	230.63637	0	1	2	1	0.656599	31.709131
b1022	0	Experiment 14	Stack_col_14_15.tif	244.0	0	1	2	1	0.87328714	23.271723
b1023	0	Experiment 14	Stack_col_14_15.tif	236.46341	0	1	2	1	0.89549905	17.472782
b1024	0	Experiment 14	Stack_col_14_15.tif	238.52632	0	1	2	1	0.56063616	26.132814
b1025	0	Experiment 14	Stack_col_14_15.tif	241.95122	0	1	2	1	0.9708234	16.51763
b1026	0	Experiment 14	Stack_col_14_15.tif	236.96078	0	1	2	1	0.38815117	45.21905
b1027	0	Experiment 14	Stack_col_14_15.tif	245.41026	0	1	2	1	0.7619755	17.863392
b1028	0	Experiment 14	Stack_col_14_15.tif	242.88889	0	1	2	1	0.7923809	24.318066
b1029	0	Experiment 14	Stack_col_14_15.tif	243.67567	0	1	2	1	0.8607383	20.16925
b1030	0	Experiment 14	Stack_col_14_15.tif	242.10185	1	1	2	1	0.42083654	47.57731
b1031	0	Experiment 14	Stack_col_14_15.tif	242.73627	0	1	2	1	0.52034664	41.071014
b1032	0	Experiment 14	Stack_col_14_15.tif	233.24562	1	1	2	1	0.8594104	24.049704
b1033	0	Experiment 14	Stack_col_14_15.tif	243.39536	0	1	2	1	0.8988604	19.580074
b1034	0	Experiment 14	Stack_col_14_15.tif	241.59375	0	1	2	1	0.68041235	27.393744
b1035	0	Experiment 14	Stack_col_14_15.tif	244.52942	1	1	2	1	0.8122867	18.578114
b1036	0	Experiment 14	Stack_col_14_15.tif	236.84616	0	1	2	1	0.5182433	29.962645
b1037	0	Experiment 14	Stack_col_14_15.tif	236.15686	0	1	2	1	0.6663193	22.727705
b1038	0	Experiment 14	Stack_col_14_15.tif	242.02942	1	1	2	1	0.84861594	28.47221
b1039	0	Experiment 14	Stack_col_14_15.tif	238.58824	0	1	2	1	0.70275396	22.00199
b1041	0	Experiment 14	Stack_col_14_15.tif	233.36842	0	1	2	1	0.9469949	17.523977
b1042	0	Experiment 14	Stack_col_14_15.tif	241.74324	0	1	2	1	0.57322174	32.892937
b1044	0	Experiment 14	Stack_col_14_15.tif	241.02563	0	1	2	1	0.46336076	35.499382
b1045	0	Experiment 14	Stack_col_14_15.tif	243.42223	0	1	2	1	0.8835979	20.709146
b1046	0	Experiment 14	Stack_col_14_15.tif	242.98148	0	1	2	1	0.51972824	28.811422
b1047	0	Experiment 14	Stack_col_14_15.tif	235.55556	1	1	2	1	0.7593626	28.776875
b1048	0	Experiment 14	Stack_col_14_15.tif	233.22449	1	1	2	1	0.952	21.330767
b1049	0	Experiment 14	Stack_col_14_15.tif	240.67647	0	1	2	1	0.7982018	32.673233
b1050	0	Experiment 14	Stack_col_14_15.tif	243.25757	1	1	2	1	0.6277139	29.609358
b1051	0	Experiment 14	Stack_col_14_15.tif	242.68085	0	1	2	1	0.94413406	20.075855
b1052	0	Experiment 14	Stack_col_14_15.tif	234.3	0	1	2	1	0.95314425	11.958124
b1053	0	Experiment 14	Stack_col_14_15.tif	241.35822	1	1	2	1	0.81172585	28.34702
b1054	0	Experiment 14	Stack_col_14_15.tif	234.85	0	1	2	1	0.7837435	18.012827
b1055	0	Experiment 14	Stack_col_14_15.tif	231.85106	0	1	2	1	0.8202247	19.84149
b1056	0	Experiment 14	Stack_col_14_15.tif	240.46808	0	1	2	1	0.8880546	20.356194
b1057	0	Experiment 14	Stack_col_14_15.tif	243.32	0	1	2	1	0.7879781	22.239782
b1058	0	Experiment 14	Stack_col_14_15.tif	239.30357	0	1	2	1	0.6897436	26.429466
b1059	0	Experiment 14	Stack_col_14_15.tif	241.98181	1	1	2	1	0.87338287	24.421844
b1060	0	Experiment 14	Stack_col_14_15.tif	235.2889	0	1	2	1	0.8407895	19.796667
b1061	0	Experiment 14	Stack_col_14_15.tif	242.03226	0	1	2	1	0.91930205	14.471061
b1062	0	Experiment 14	Stack_col_14_15.tif	243.14285	0	1	2	1	0.93571675	21.010918
b1063	0	Experiment 14	Stack_col_14_15.tif	240.8421	0	1	2	1	0.90909094	17.11465
b1064	0	Experiment 14	Stack_col_14_15.tif	233.52632	0	1	2	1	0.7881041	25.876997
b1065	0	Experiment 14	Stack_col_14_15.tif	231.36986	0	1	2	1	0.8699324	29.940493
b1066	0	Experiment 14	Stack_col_14_15.tif	242.10667	0	1	2	1	0.843762	33.15998
b1067	0	Experiment 14	Stack_col_14_15.tif	245.21277	0	1	2	1	0.8729977	20.475594
b1068	0	Experiment 14	Stack_col_14_15.tif	246.22858	1	1	2	1	0.9138514	32.689903
b1069	0	Experiment 14	Stack_col_14_15.tif	241.51352	0	1	2	1	0.94205445	16.361567
b1070	0	Experiment 14	Stack_col_14_15.tif	242.69148	1	1	2	1	0.54172873	39.69982
b1071	0	Experiment 14	Stack_col_14_15.tif	241.62222	0	1	2	1	0.69014084	25.401016
b1072	0	Experiment 14	Stack_col_14_15.tif	241.66667	1	1	2	1	0.8063781	19.77063
b1073	0	Experiment 14	Stack_col_14_15.tif	243.43333	0	1	2	1	0.94736844	22.87914
b1074	0	Experiment 14	Stack_col_14_15.tif	234.18666	0	1	2	1	0.72322	36.05014
b1075	0	Experiment 14	Stack_col_14_15.tif	240.82716	1	1	2	1	0.49138638	34.30803
b1076	0	Experiment 14	Stack_col_14_15.tif	241.34	1	1	2	1	0.83522725	22.854443
b1077	0	Experiment 14	Stack_col_14_15.tif	235.98305	0	1	2	1	0.7667426	25.014975
b1078	0	Experiment 14	Stack_col_14_15.tif	241.71794	0	1	2	1	0.9821588	17.635963
b1079	0	Experiment 14	Stack_col_14_15.tif	231.12631	1	1	2	1	0.38412076	42.623405
b1080	0	Experiment 14	Stack_col_14_15.tif	231.62122	1	1	2	1	0.780315	28.101118
b1081	0	Experiment 14	Stack_col_14_15.tif	242.2439	0	1	2	1	0.8383504	20.397125
b1082	0	Experiment 14	Stack_col_14_15.tif	244.25262	0	1	2	1	0.46319512	44.055515
b1083	0	Experiment 14	Stack_col_14_15.tif	232.63934	1	1	2	1	0.85406923	27.435904
b1084	0	Experiment 14	Stack_col_14_15.tif	240.57303	0	1	2	1	0.47998556	38.634056
b1085	0	Experiment 14	Stack_col_14_15.tif	234.65384	0	1	2	1	0.96947676	18.349398
b1086	0	Experiment 14	Stack_col_14_15.tif	241.65834	0	1	2	1	0.72894174	66.07191
b1087	0	Experiment 14	Stack_col_14_15.tif	241.02438	0	1	2	1	0.8099291	19.051126
b1088	0	Experiment 14	Stack_col_14_15.tif	240.83133	1	1	2	1	0.40393597	35.831062
b1089	0	Experiment 14	Stack_col_14_15.tif	234.92188	0	1	2	1	0.76917	28.755774
b1090	0	Experiment 14	Stack_col_14_15.tif	237.9423	0	1	2	1	0.816129	21.157349
b1091	0	Experiment 14	Stack_col_14_15.tif	242.66667	0	1	2	1	0.8236776	22.012585
b1092	0	Experiment 14	Stack_col_14_15.tif	234.57692	0	1	2	1	0.7852495	23.830822
b1093	0	Experiment 14	Stack_col_14_15.tif	242.52632	0	1	2	1	0.6136035	25.034588
b1094	0	Experiment 14	Stack_col_14_15.tif	244.53061	0	1	2	1	0.95478725	21.340069
b1095	0	Experiment 14	Stack_col_14_15.tif	241.38461	0	1	2	1	0.9327586	17.57741
b1096	0	Experiment 14	Stack_col_14_15.tif	237.28947	0	1	2	1	0.8125	15.35486
b1097	0	Experiment 14	Stack_col_14_15.tif	244.34146	0	1	2	1	0.9368771	17.149452
b1098	0	Experiment 14	Stack_col_14_15.tif	240.225	1	1	2	1	0.61506706	21.713013
b1099	0	Experiment 14	Stack_col_14_15.tif	239.96378	0	1	2	1	0.3043665	64.6306
b1100	0	Experiment 14	Stack_col_14_15.tif	243.37143	1	1	2	1	0.6876228	33.26048
b1101	0	Experiment 14	Stack_col_14_15.tif	240.05556	0	1	2	1	0.9481353	15.23487
b1102	0	Experiment 14	Stack_col_14_15.tif	241.62318	1	1	2	1	0.7929448	32.556126
b1103	0	Experiment 14	Stack_col_14_15.tif	236.34042	0	1	2	1	0.8721245	20.3597
b1104	0	Experiment 14	Stack_col_14_15.tif	240.6579	0	1	2	1	0.8	17.497898
b1105	0	Experiment 14	Stack_col_14_15.tif	241.5	0	1	2	1	0.66261846	36.057327
b1106	0	Experiment 14	Stack_col_14_15.tif	242.63043	0	1	2	1	0.9113129	19.648863
b1107	0	Experiment 14	Stack_col_14_15.tif	240.31944	1	1	2	1	0.6235996	34.925117
b1108	0	Experiment 14	Stack_col_14_15.tif	244.28	0	1	2	1	0.9011264	21.464865
b1109	0	Experiment 14	Stack_col_14_15.tif	232.17392	1	1	2	1	0.9167455	31.108112
b1110	0	Experiment 14	Stack_col_14_15.tif	244.33333	0	1	2	1	0.91878355	19.780638
b1111	0	Experiment 14	Stack_col_14_15.tif	236.81482	1	1	2	1	0.792695	23.917677
b1112	0	Experiment 14	Stack_col_14_15.tif	243.36586	0	1	2	1	0.9157393	17.51003
b1113	0	Experiment 14	Stack_col_14_15.tif	243.54688	1	1	2	1	0.79657197	28.2716
b1114	0	Experiment 14	Stack_col_14_15.tif	242.13559	0	1	2	1	0.85192305	25.786057
b1115	0	Experiment 14	Stack_col_14_15.tif	246.325	1	1	2	1	0.7104019	22.275377
b1116	0	Experiment 14	Stack_col_14_15.tif	240.27397	1	1	2	1	0.94655174	32.04787
b1117	0	Experiment 14	Stack_col_14_15.tif	243.6	0	1	2	1	0.7998761	19.54604
b1118	0	Experiment 14	Stack_col_14_15.tif	244.05882	0	1	2	1	0.9423868	13.960395
b1119	0	Experiment 14	Stack_col_14_15.tif	240.03279	1	1	2	1	0.5589641	55.40788
b1120	0	Experiment 14	Stack_col_14_15.tif	243.26582	1	1	2	1	0.6132729	34.18604
b1121	0	Experiment 14	Stack_col_14_15.tif	240.5921	1	1	2	1	0.59166664	41.01998
b1122	0	Experiment 14	Stack_col_14_15.tif	229.69643	1	1	2	1	0.8609342	23.326302
b1123	0	Experiment 14	Stack_col_14_15.tif	239.12	0	1	2	1	0.7292278	24.092985
b1124	0	Experiment 14	Stack_col_14_15.tif	243.17241	0	1	2	1	0.6602907	27.836115
b1125	0	Experiment 14	Stack_col_14_15.tif	244.40625	1	1	2	1	0.90346086	30.103651
b1126	0	Experiment 14	Stack_col_14_15.tif	240.90909	0	1	2	1	0.8217021	28.814331
b1127	0	Experiment 14	Stack_col_14_15.tif	242.85454	1	1	2	1	0.7123348	24.328257
b1128	0	Experiment 14	Stack_col_14_15.tif	239.72728	0	1	2	1	0.8453276	24.074295
b1129	0	Experiment 14	Stack_col_14_15.tif	244.14546	1	1	2	1	0.81112194	30.562386
b1130	0	Experiment 14	Stack_col_14_15.tif	234.67693	0	1	2	1	0.6131065	28.739006
b1131	0	Experiment 14	Stack_col_14_15.tif	240.63266	0	1	2	1	0.7523759	23.593403
b1132	0	Experiment 14	Stack_col_14_15.tif	231.13333	1	1	2	1	0.5207852	31.009691
b1133	0	Experiment 14	Stack_col_14_15.tif	232.46666	1	1	2	1	0.91260743	18.996502
b1134	0	Experiment 14	Stack_col_14_15.tif	240.65454	0	1	2	1	0.7414449	24.954763
b1135	0	Experiment 14	Stack_col_14_15.tif	241.30232	0	1	2	1	0.9522388	19.937222
b1136	0	Experiment 14	Stack_col_14_15.tif	243.38028	1	1	2	1	0.5425532	35.95151
b1137	0	Experiment 14	Stack_col_14_15.tif	239.10869	0	1	2	1	0.9674735	20.165958
b1138	0	Experiment 14	Stack_col_14_15.tif	242.95122	0	1	2	1	0.84615386	21.49617
b1139	0	Experiment 14	Stack_col_14_15.tif	237.66667	1	1	2	1	0.8139293	25.99308
b1140	0	Experiment 14	Stack_col_14_15.tif	242.45833	0	1	2	1	0.9297297	20.817894
b1141	0	Experiment 14	Stack_col_14_15.tif	238.20409	0	1	2	1	0.83714545	21.084623
b1142	0	Experiment 14	Stack_col_14_15.tif	244.46512	0	1	2	1	0.91004336	18.729193
b1143	0	Experiment 14	Stack_col_14_15.tif	234.19862	1	1	2	1	0.22311856	62.146408
b1144	0	Experiment 14	Stack_col_14_15.tif	242.04546	1	1	2	1	0.6236593	34.834515
b1145	0	Experiment 14	Stack_col_14_15.tif	246.19513	0	1	2	1	0.9323077	18.098234
b1146	0	Experiment 14	Stack_col_14_15.tif	242.22223	0	1	2	1	0.8095643	29.04866
b1147	0	Experiment 14	Stack_col_14_15.tif	242.44444	0	1	2	1	0.481368	37.36637
b1148	0	Experiment 14	Stack_col_14_15.tif	241.48438	1	1	2	1	0.670504	33.64246
b1149	0	Experiment 14	Stack_col_14_15.tif	232.6	1	1	2	1	0.6769231	24.22927
b1150	0	Experiment 14	Stack_col_14_15.tif	243.29578	1	1	2	1	0.9148567	31.183657
b1151	0	Experiment 14	Stack_col_14_15.tif	242.7255	0	1	2	1	0.78969073	23.965004
b1152	0	Experiment 14	Stack_col_14_15.tif	238.83018	0	1	2	1	0.7640562	24.095802
b1153	0	Experiment 14	Stack_col_14_15.tif	240.1125	1	1	2	1	0.41840184	35.79041
b1154	0	Experiment 14	Stack_col_14_15.tif	239.39024	0	1	2	1	0.99102336	14.981138
b1155	0	Experiment 14	Stack_col_14_15.tif	238.82979	0	1	2	1	0.9388336	17.961643
b1156	0	Experiment 14	Stack_col_14_15.tif	244.8125	0	1	2	1	0.7227576	22.524765
b1157	0	Experiment 14	Stack_col_14_15.tif	245.0	1	1	2	1	0.9547304	27.98431
b1158	0	Experiment 14	Stack_col_14_15.tif	242.02856	0	1	2	1	0.48872092	32.710915
b1159	0	Experiment 14	Stack_col_14_15.tif	244.63829	0	1	2	1	0.776442	23.345947
b1160	0	Experiment 14	Stack_col_14_15.tif	242.6	0	1	2	1	0.9739788	12.242968
b1161	0	Experiment 14	Stack_col_14_15.tif	243.21739	1	1	2	1	0.9602475	19.595415
b1162	0	Experiment 14	Stack_col_14_15.tif	244.9697	0	1	2	1	0.76637715	31.527977
b1163	0	Experiment 14	Stack_col_14_15.tif	243.65753	1	1	2	1	0.7006135	38.121574
b1164	0	Experiment 14	Stack_col_14_15.tif	244.98276	0	1	2	1	0.89294773	25.457026
b1165	0	Experiment 14	Stack_col_14_15.tif	237.91176	1	1	2	1	0.5153374	32.113255
b1166	0	Experiment 14	Stack_col_14_15.tif	243.58928	0	1	2	1	0.72126055	24.404984
b1167	0	Experiment 14	Stack_col_14_15.tif	242.46153	0	1	2	1	0.7060185	23.376886
b1168	0	Experiment 14	Stack_col_14_15.tif	244.0196	0	1	2	1	0.9300518	21.536976
b1169	0	Experiment 14	Stack_col_14_15.tif	242.33333	1	1	2	1	0.5815062	37.166187
b1170	0	Experiment 14	Stack_col_14_15.tif	242.93333	0	1	2	1	0.95452046	20.189365
b1171	0	Experiment 14	Stack_col_14_15.tif	241.76923	0	1	2	1	0.851181	22.029325
b1172	0	Experiment 14	Stack_col_14_15.tif	241.12698	0	1	2	1	0.73432344	26.2692
b1173	0	Experiment 14	Stack_col_14_15.tif	229.35484	0	1	2	1	0.9017341	27.056273
b1174	0	Experiment 14	Stack_col_14_15.tif	222.6187	1	1	2	1	0.6675511	47.835266
b1175	0	Experiment 14	Stack_col_14_15.tif	243.86667	0	1	2	1	0.875	20.634834
b1176	0	Experiment 14	Stack_col_14_15.tif	243.15	1	1	2	1	0.802193	28.17412
b1177	0	Experiment 14	Stack_col_14_15.tif	241.98718	0	1	2	1	0.8381831	35.825768
b1178	0	Experiment 14	Stack_col_14_15.tif	241.7541	0	1	2	1	0.7557377	29.380909
b1179	0	Experiment 14	Stack_col_14_15.tif	242.47728	1	1	2	1	0.9120235	18.663742
b1180	0	Experiment 14	Stack_col_14_15.tif	238.96721	0	1	2	1	0.4640489	30.053774
b1182	0	Experiment 14	Stack_col_14_15.tif	235.22858	1	1	2	1	0.82336897	15.256989
b1183	0	Experiment 14	Stack_col_14_15.tif	233.60976	0	1	2	1	0.9198718	18.942282
b1184	0	Experiment 14	Stack_col_14_15.tif	241.51666	0	1	2	1	0.8443171	27.612907
b1185	0	Experiment 14	Stack_col_14_15.tif	242.22116	0	1	2	1	0.5157068	47.016243
b1186	0	Experiment 14	Stack_col_14_15.tif	242.47368	1	1	2	1	0.77862597	25.261675
b1187	0	Experiment 14	Stack_col_14_15.tif	238.75471	1	1	2	1	0.6404865	25.753487
b1188	0	Experiment 14	Stack_col_14_15.tif	243.55173	0	1	2	1	0.8565132	27.625982
b1189	0	Experiment 14	Stack_col_14_15.tif	237.47298	0	1	2	1	0.5829042	33.931103
b1190	0	Experiment 14	Stack_col_14_15.tif	243.85	0	1	2	1	0.8982524	19.698572
b1191	0	Experiment 14	Stack_col_14_15.tif	242.5	0	1	2	1	0.68367344	22.036385
b1192	0	Experiment 14	Stack_col_14_15.tif	242.79411	0	1	2	1	0.76231664	29.621414
b1193	0	Experiment 14	Stack_col_14_15.tif	236.60318	0	1	2	1	0.84108084	28.258099
b1194	0	Experiment 14	Stack_col_14_15.tif	233.51282	1	1	2	1	0.6312758	51.124878
b1195	0	Experiment 14	Stack_col_14_15.tif	237.67647	0	1	2	1	0.49704492	30.23662
b1196	0	Experiment 14	Stack_col_14_15.tif	241.7069	0	1	2	1	0.8804348	25.858871
b1197	0	Experiment 14	Stack_col_14_15.tif	241.88095	0	1	2	1	0.92715365	17.69386
b1198	0	Experiment 14	Stack_col_14_15.tif	245.56097	0	1	2	1	0.94086426	17.749504
b1199	0	Experiment 14	Stack_col_14_15.tif	243.23529	1	1	2	1	0.49001598	54.759323
b1200	0	Experiment 14	Stack_col_14_15.tif	238.37288	0	1	2	1	0.9544507	21.396242
b1201	0	Experiment 14	Stack_col_14_15.tif	240.7111	0	1	2	1	0.8787879	19.436836
b1202	0	Experiment 14	Stack_col_14_15.tif	241.05173	1	1	2	1	0.8330097	26.760218
b1203	0	Experiment 14	Stack_col_14_15.tif	239.5974	1	1	2	1	0.63093245	36.936466
b1204	0	Experiment 14	Stack_col_14_15.tif	235.40909	1	1	2	1	0.82791585	32.23031
b1205	0	Experiment 14	Stack_col_14_15.tif	241.96297	1	1	2	1	0.5696817	27.68149
b1206	0	Experiment 14	Stack_col_14_15.tif	244.80281	0	1	2	1	0.6958347	33.685272
b1207	0	Experiment 14	Stack_col_14_15.tif	244.8	0	1	2	1	0.95878524	12.712927
b1208	0	Experiment 14	Stack_col_14_15.tif	242.20755	1	1	2	1	0.6386555	25.595287
b1209	0	Experiment 14	Stack_col_14_15.tif	237.75807	1	1	2	1	0.7493692	31.56939
b1210	0	Experiment 14	Stack_col_14_15.tif	240.8116	1	1	2	1	0.45680687	31.26753
b1211	0	Experiment 14	Stack_col_14_15.tif	241.81482	0	1	2	1	0.9282297	23.132303
b1212	0	Experiment 14	Stack_col_14_15.tif	243.56717	1	1	2	1	0.8048874	34.416588
b1213	0	Experiment 14	Stack_col_14_15.tif	237.51807	1	1	2	1	0.626764	39.84523
b1214	0	Experiment 14	Stack_col_14_15.tif	241.01923	0	1	2	1	0.8642857	22.417976
b1215	0	Experiment 14	Stack_col_14_15.tif	242.66667	1	1	2	1	0.74981713	30.854853
b1216	0	Experiment 14	Stack_col_14_15.tif	242.79747	1	1	2	1	0.62871796	34.811523
b1217	0	Experiment 14	Stack_col_14_15.tif	238.7347	0	1	2	1	0.84031713	23.863913
b1218	0	Experiment 14	Stack_col_14_15.tif	234.34285	1	1	2	1	0.9015151	33.27607
b1219	0	Experiment 14	Stack_col_14_15.tif	243.10638	0	1	2	1	0.7505721	19.93419
b1220	0	Experiment 14	Stack_col_14_15.tif	243.21666	0	1	2	1	0.9144603	26.42186
b1221	0	Experiment 14	Stack_col_14_15.tif	239.24324	0	1	2	1	0.95149255	16.857792
b1222	0	Experiment 14	Stack_col_14_15.tif	239.44444	0	1	2	1	0.9240987	14.558835
b1223	0	Experiment 14	Stack_col_14_15.tif	237.1884	1	1	2	1	0.48690635	32.29694
b1224	0	Experiment 14	Stack_col_14_15.tif	243.5	1	1	2	1	0.88532555	26.260159
b1225	0	Experiment 14	Stack_col_14_15.tif	239.375	0	1	2	1	0.95725536	13.565504
b1226	0	Experiment 14	Stack_col_14_15.tif	242.36111	0	1	2	1	0.8964912	17.433167
b1227	0	Experiment 14	Stack_col_14_15.tif	243.39473	0	1	2	1	0.90387857	16.830809
b1228	0	Experiment 14	Stack_col_14_15.tif	242.71053	0	1	2	1	0.9136442	17.977173
b1229	0	Experiment 14	Stack_col_14_15.tif	241.49153	0	1	2	1	0.8394584	28.19072
b1230	0	Experiment 14	Stack_col_14_15.tif	237.17778	0	1	2	1	0.827027	20.353584
b1231	0	Experiment 14	Stack_col_14_15.tif	241.36111	0	1	2	1	0.9429348	18.156755
b1232	0	Experiment 14	Stack_col_14_15.tif	241.57576	0	1	2	1	0.4528122	30.410471
b1233	0	Experiment 14	Stack_col_14_15.tif	240.15874	0	1	2	1	0.5916297	29.723911
b1234	0	Experiment 14	Stack_col_14_15.tif	236.95238	0	1	2	1	0.89159065	26.585981
b1235	0	Experiment 14	Stack_col_14_15.tif	239.21918	1	1	2	1	0.8258165	32.28074
b1236	0	Experiment 14	Stack_col_14_15.tif	237.04347	0	1	2	1	0.581621	34.353645
b1237	0	Experiment 14	Stack_col_14_15.tif	243.11905	0	1	2	1	0.8774105	19.289402
b1238	0	Experiment 14	Stack_col_14_15.tif	241.69862	1	1	2	1	0.4881057	32.78217
b1239	0	Experiment 14	Stack_col_14_15.tif	242.76666	0	1	2	1	0.6731928	28.957382
b1240	0	Experiment 14	Stack_col_14_15.tif	242.26414	0	1	2	1	0.7942387	22.035889
b1241	0	Experiment 14	Stack_col_14_15.tif	243.65218	1	1	2	1	0.7662722	31.654005
b1242	0	Experiment 14	Stack_col_14_15.tif	238.04347	0	1	2	1	0.92945904	21.287907
b1243	0	Experiment 14	Stack_col_14_15.tif	243.19354	1	1	2	1	0.6334968	27.935743
b1244	0	Experiment 14	Stack_col_14_15.tif	244.325	0	1	2	1	0.965	18.678858
b1245	0	Experiment 14	Stack_col_14_15.tif	243.18666	0	1	2	1	0.6465222	33.37548
b1246	0	Experiment 14	Stack_col_14_15.tif	239.81667	0	1	2	1	0.8046595	26.445442
b1247	0	Experiment 14	Stack_col_14_15.tif	244.62791	0	1	2	1	0.84281844	18.644455
b1255	0	Experiment 14	Stack_col_14_15.tif	234.37038	0	1	3	1	0.97447413	24.522497
b1256	0	Experiment 14	Stack_col_14_15.tif	243.33333	0	1	3	1	0.95216954	14.082148
b1257	0	Experiment 14	Stack_col_14_15.tif	233.88095	0	1	3	1	0.72166437	22.936808
b1258	0	Experiment 14	Stack_col_14_15.tif	235.38298	0	1	3	1	0.93999076	19.10118
b1259	0	Experiment 14	Stack_col_14_15.tif	236.38889	0	1	3	1	0.6962478	23.602419
b1260	0	Experiment 14	Stack_col_14_15.tif	232.475	0	1	3	1	0.85662764	17.66521
b1261	0	Experiment 14	Stack_col_14_15.tif	240.54903	0	1	3	1	0.9560414	21.662485
b1262	0	Experiment 14	Stack_col_14_15.tif	243.75	1	1	3	1	0.898736	38.92181
b1263	0	Experiment 14	Stack_col_14_15.tif	242.8158	1	1	3	1	0.63321346	34.720123
b1264	0	Experiment 14	Stack_col_14_15.tif	232.64	1	1	3	1	0.38828084	36.127052
b1265	0	Experiment 14	Stack_col_14_15.tif	243.8	0	1	3	1	0.77489203	22.527931
b1266	0	Experiment 14	Stack_col_14_15.tif	233.94444	0	1	3	1	0.6838942	31.285692
b1267	0	Experiment 14	Stack_col_14_15.tif	252.9	0	1	3	1	0.91122735	32.77145
b1268	0	Experiment 14	Stack_col_14_15.tif	237.8421	0	1	3	1	0.559786	26.920517
b1269	0	Experiment 14	Stack_col_14_15.tif	240.65625	1	1	3	1	0.667385	35.01308
b1270	0	Experiment 14	Stack_col_14_15.tif	233.94444	0	1	3	1	0.62633437	25.984598
b1271	0	Experiment 14	Stack_col_14_15.tif	239.76471	1	1	3	1	0.63971335	22.515188
b1272	0	Experiment 14	Stack_col_14_15.tif	242.0238	1	1	3	1	0.5092676	38.679245
b1273	0	Experiment 14	Stack_col_14_15.tif	242.41936	1	1	3	1	0.704251	27.330591
b1274	0	Experiment 14	Stack_col_14_15.tif	238.54762	0	1	3	1	0.6763014	18.220768
b1275	0	Experiment 14	Stack_col_14_15.tif	236.60216	1	1	3	1	0.49191076	45.616837
b1276	0	Experiment 14	Stack_col_14_15.tif	233.08333	0	1	3	1	0.9331081	21.519064
b1277	0	Experiment 14	Stack_col_14_15.tif	246.41176	0	1	3	1	0.93274236	19.500738
b1278	0	Experiment 14	Stack_col_14_15.tif	234.95349	0	1	3	1	0.94122535	19.330124
b1279	0	Experiment 14	Stack_col_14_15.tif	244.33333	0	1	3	1	0.8099574	21.66223
b1280	0	Experiment 14	Stack_col_14_15.tif	240.45714	0	1	3	1	0.9568618	15.651097
b1281	0	Experiment 14	Stack_col_14_15.tif	241.80232	0	1	3	1	0.6392788	38.32376
b1282	0	Experiment 14	Stack_col_14_15.tif	242.5	0	1	3	1	0.81660146	23.148422
b1283	0	Experiment 14	Stack_col_14_15.tif	241.59459	0	1	3	1	0.9637218	15.441866
b1284	0	Experiment 14	Stack_col_14_15.tif	234.7971	0	1	3	1	0.45829412	30.251734
b1285	0	Experiment 14	Stack_col_14_15.tif	242.7	0	1	3	1	0.8890202	19.52489
b1286	0	Experiment 14	Stack_col_14_15.tif	233.33333	0	1	3	1	0.9515042	19.10315
b1287	0	Experiment 14	Stack_col_14_15.tif	232.93024	0	1	3	1	0.89526725	20.282553
b1288	0	Experiment 14	Stack_col_14_15.tif	231.7193	1	1	3	1	0.78412026	25.389889
b1289	0	Experiment 14	Stack_col_14_15.tif	237.7027	1	1	3	1	0.88505745	16.062614
b1290	0	Experiment 14	Stack_col_14_15.tif	238.02083	0	1	3	1	0.5379759	22.644213
b1291	0	Experiment 14	Stack_col_14_15.tif	238.5493	1	1	3	1	0.565352	32.162758
b1292	0	Experiment 14	Stack_col_14_15.tif	233.43103	1	1	3	1	0.83580613	27.427467
b1293	0	Experiment 14	Stack_col_14_15.tif	235.66667	0	1	3	1	0.63419235	27.302362
b1294	0	Experiment 14	Stack_col_14_15.tif	239.35	0	1	3	1	0.7983154	26.61792
b1295	0	Experiment 14	Stack_col_14_15.tif	240.8372	1	1	3	1	0.6733084	39.94591
b1296	0	Experiment 14	Stack_col_14_15.tif	232.9863	0	1	3	1	0.69635564	35.805126
b1297	0	Experiment 14	Stack_col_14_15.tif	240.32877	1	1	3	1	0.907957	31.769503
b1298	0	Experiment 14	Stack_col_14_15.tif	234.11429	0	1	3	1	0.9547885	16.140188
b1299	0	Experiment 14	Stack_col_14_15.tif	236.4151	0	1	3	1	0.8706389	24.298223
b1300	0	Experiment 14	Stack_col_14_15.tif	243.47437	0	1	3	1	0.6727106	32.174267
b1301	0	Experiment 14	Stack_col_14_15.tif	239.56717	0	1	3	1	0.70842737	30.745398
b1302	0	Experiment 14	Stack_col_14_15.tif	236.0875	1	1	3	1	0.6358801	37.310562
b1303	0	Experiment 14	Stack_col_14_15.tif	234.56097	0	1	3	1	0.8258335	19.964798
b1304	0	Experiment 14	Stack_col_14_15.tif	233.38028	1	1	3	1	0.69221604	30.585941
b1305	0	Experiment 14	Stack_col_14_15.tif	240.81482	1	1	3	1	0.6559023	39.889034
b1306	0	Experiment 14	Stack_col_14_15.tif	235.15909	0	1	3	1	0.88726515	18.84548
b1307	0	Experiment 14	Stack_col_14_15.tif	243.92537	1	1	3	1	0.84940726	29.702148
b1308	0	Experiment 14	Stack_col_14_15.tif	243.60464	0	1	3	1	0.856085	18.164108
b1309	0	Experiment 14	Stack_col_14_15.tif	246.07143	0	1	3	1	0.92987806	17.67782
b1310	0	Experiment 14	Stack_col_14_15.tif	243.35715	1	1	3	1	0.45009133	39.360622
b1311	0	Experiment 14	Stack_col_14_15.tif	237.55	0	1	3	1	0.9416118	17.448853
b1312	0	Experiment 14	Stack_col_14_15.tif	241.58035	1	1	3	1	0.89219725	49.928734
b1313	0	Experiment 14	Stack_col_14_15.tif	239.59525	0	1	3	1	0.84616774	18.355131
b1314	0	Experiment 14	Stack_col_14_15.tif	246.0	0	1	3	1	0.9107049	22.700855
b1315	0	Experiment 14	Stack_col_14_15.tif	242.7541	0	1	3	1	0.6562415	28.17819
b1316	0	Experiment 14	Stack_col_14_15.tif	241.44118	0	1	3	1	0.82304525	16.721222
b1317	0	Experiment 14	Stack_col_14_15.tif	225.48148	0	1	3	1	0.82721204	20.985527
b1318	0	Experiment 14	Stack_col_14_15.tif	238.43243	0	1	3	1	0.9434144	16.816011
b1319	0	Experiment 14	Stack_col_14_15.tif	242.37878	1	1	3	1	0.7570741	31.80241
b1320	0	Experiment 14	Stack_col_14_15.tif	244.93939	0	1	3	1	0.96349263	14.735073
b1321	0	Experiment 14	Stack_col_14_15.tif	235.79245	0	1	3	1	0.95778614	24.097488
b1322	0	Experiment 14	Stack_col_14_15.tif	241.58241	0	1	3	1	0.41329622	41.73153
b1323	0	Experiment 14	Stack_col_14_15.tif	240.55933	0	1	3	1	0.7354061	27.976772
b1324	0	Experiment 14	Stack_col_14_15.tif	235.80597	1	1	3	1	0.8034108	29.993092
b1325	0	Experiment 14	Stack_col_14_15.tif	242.14285	0	1	3	1	0.84383065	27.973639
b1326	0	Experiment 14	Stack_col_14_15.tif	237.26086	0	1	3	1	0.9203556	19.406258
b1327	0	Experiment 14	Stack_col_14_15.tif	242.66667	0	1	3	1	0.7170514	29.156443
b1328	0	Experiment 14	Stack_col_14_15.tif	239.5873	1	1	3	1	0.49973017	31.857428
b1329	0	Experiment 14	Stack_col_14_15.tif	239.36781	0	1	3	1	0.36396867	55.251865
b1330	0	Experiment 14	Stack_col_14_15.tif	233.8772	1	1	3	1	0.8285571	25.877132
b1331	0	Experiment 14	Stack_col_14_15.tif	237.45312	0	1	3	1	0.56440216	29.580938
b1332	0	Experiment 14	Stack_col_14_15.tif	242.85507	0	1	3	1	0.6077247	32.159946
b1333	0	Experiment 14	Stack_col_14_15.tif	240.30612	0	1	3	1	0.82149297	19.690363
b1334	0	Experiment 14	Stack_col_14_15.tif	244.90475	0	1	3	1	0.862028	27.556591
b1335	0	Experiment 14	Stack_col_14_15.tif	236.23404	1	1	3	1	0.93036926	21.950861
b1336	0	Experiment 14	Stack_col_14_15.tif	234.78947	0	1	3	1	0.8065217	26.967663
b1337	0	Experiment 14	Stack_col_14_15.tif	236.50877	0	1	3	1	0.76148283	27.647453
b1338	0	Experiment 14	Stack_col_14_15.tif	234.72223	0	1	3	1	0.9114889	22.840952
b1339	0	Experiment 14	Stack_col_14_15.tif	241.9697	0	1	3	1	0.9357549	26.250027
b1340	0	Experiment 14	Stack_col_14_15.tif	242.80646	0	1	3	1	0.8138645	26.667923
b1341	0	Experiment 14	Stack_col_14_15.tif	241.60785	0	1	3	1	0.8272406	20.635288
b1342	0	Experiment 14	Stack_col_14_15.tif	244.7377	0	1	3	1	0.9061583	26.614798
b1343	0	Experiment 14	Stack_col_14_15.tif	240.17647	0	1	3	1	0.7761111	24.940132
b1344	0	Experiment 14	Stack_col_14_15.tif	244.64516	0	1	3	1	0.92782426	14.610751
b1345	0	Experiment 14	Stack_col_14_15.tif	241.51562	0	1	3	1	0.85790884	28.873896
b1346	0	Experiment 14	Stack_col_14_15.tif	245.03076	0	1	3	1	0.72752655	28.062738
b1347	0	Experiment 14	Stack_col_14_15.tif	235.43137	0	1	3	1	0.9642393	21.565279
b1348	0	Experiment 14	Stack_col_14_15.tif	245.15	0	1	3	1	0.9635184	18.560305
b1349	0	Experiment 14	Stack_col_14_15.tif	236.19354	0	1	3	1	0.5184709	43.754757
b1350	0	Experiment 14	Stack_col_14_15.tif	241.37209	0	1	3	1	0.79370743	19.59059
b1351	0	Experiment 14	Stack_col_14_15.tif	240.21951	0	1	3	1	0.8083079	16.93036
b1352	0	Experiment 14	Stack_col_14_15.tif	242.26866	0	1	3	1	0.8387439	30.917618
b1353	0	Experiment 14	Stack_col_14_15.tif	243.1282	1	1	3	1	0.5615085	34.832764
b1354	0	Experiment 14	Stack_col_14_15.tif	241.36765	0	1	3	1	0.8377346	28.327423
b1355	0	Experiment 14	Stack_col_14_15.tif	243.61667	1	1	3	1	0.6289529	35.523174
b1356	0	Experiment 14	Stack_col_14_15.tif	242.46	0	1	3	1	0.6678201	24.436682
b1357	0	Experiment 14	Stack_col_14_15.tif	242.30159	0	1	3	1	0.635689	27.253187
b1358	0	Experiment 14	Stack_col_14_15.tif	245.46808	1	1	3	1	0.91486484	22.046848
b1359	0	Experiment 14	Stack_col_14_15.tif	242.0196	0	1	3	1	0.88061464	22.52475
b1360	0	Experiment 14	Stack_col_14_15.tif	239.7037	1	1	3	1	0.9919786	12.152717
b1361	0	Experiment 14	Stack_col_14_15.tif	243.66667	0	1	3	1	0.91048485	20.345474
b1362	0	Experiment 14	Stack_col_14_15.tif	239.3077	0	1	3	1	0.91907513	11.348704
b1363	0	Experiment 14	Stack_col_14_15.tif	241.10417	0	1	3	1	0.9008251	22.395344
b1364	0	Experiment 14	Stack_col_14_15.tif	242.125	0	1	3	1	0.70644975	32.4926
b1365	0	Experiment 14	Stack_col_14_15.tif	239.96721	0	1	3	1	0.7146407	29.164576
b1366	0	Experiment 14	Stack_col_14_15.tif	234.04225	0	1	3	1	0.888662	31.709042
b1367	0	Experiment 14	Stack_col_14_15.tif	241.93549	0	1	3	1	0.96374494	14.716397
b1368	0	Experiment 14	Stack_col_14_15.tif	253.96297	0	1	3	1	0.9961039	24.774527
b1369	0	Experiment 14	Stack_col_14_15.tif	230.78334	0	1	3	1	0.69582665	27.228737
b1370	0	Experiment 14	Stack_col_14_15.tif	242.51282	0	1	3	1	0.8582208	16.342058
b1371	0	Experiment 14	Stack_col_14_15.tif	247.3125	0	1	3	1	0.9778714	13.584561
b1372	0	Experiment 14	Stack_col_14_15.tif	240.33333	0	1	3	1	0.8001211	43.28405
b1373	0	Experiment 14	Stack_col_14_15.tif	234.28572	0	1	3	1	0.8152304	34.781887
b1374	0	Experiment 14	Stack_col_14_15.tif	235.88373	0	1	3	1	0.69434834	18.629343
b1375	0	Experiment 14	Stack_col_14_15.tif	241.83333	0	1	3	1	0.92085236	18.76227
b1376	0	Experiment 14	Stack_col_14_15.tif	243.36046	0	1	3	1	0.6692451	37.396973
b1377	0	Experiment 14	Stack_col_14_15.tif	240.05263	0	1	3	1	0.7417337	26.20458
b1378	0	Experiment 14	Stack_col_14_15.tif	235.74026	0	1	3	1	0.39850646	35.70897
b1379	0	Experiment 14	Stack_col_14_15.tif	241.43617	1	1	3	1	0.34338775	42.547993
b1380	0	Experiment 14	Stack_col_14_15.tif	238.11765	0	1	3	1	0.8927875	15.543639
b1381	0	Experiment 14	Stack_col_14_15.tif	238.64331	1	1	3	1	0.21850316	151.07845
b1382	0	Experiment 14	Stack_col_14_15.tif	244.26666	0	1	3	1	0.94244605	19.152122
b1383	0	Experiment 14	Stack_col_14_15.tif	241.52702	1	1	3	1	0.67111653	33.085075
b1384	0	Experiment 14	Stack_col_14_15.tif	228.72414	0	1	3	1	0.9401993	25.31209
b1385	0	Experiment 14	Stack_col_14_15.tif	242.9796	0	1	3	1	0.81372005	23.312666
b1386	0	Experiment 14	Stack_col_14_15.tif	239.06557	0	1	3	1	0.6691617	27.199282
b1387	0	Experiment 14	Stack_col_14_15.tif	239.45238	0	1	3	1	0.7435144	18.417593
b1388	0	Experiment 14	Stack_col_14_15.tif	239.51724	0	1	3	1	0.8073903	27.104013
b1389	0	Experiment 14	Stack_col_14_15.tif	235.76086	0	1	3	1	0.8524173	22.743572
b1390	0	Experiment 14	Stack_col_14_15.tif	239.66667	0	1	3	1	0.84123486	17.344875
b1391	0	Experiment 14	Stack_col_14_15.tif	241.92592	1	1	3	1	0.74624103	27.711155
b1392	0	Experiment 14	Stack_col_14_15.tif	242.94444	1	1	3	1	0.51037735	34.43634
b1393	0	Experiment 14	Stack_col_14_15.tif	241.41176	0	1	3	1	0.9411765	16.12899
b1394	0	Experiment 14	Stack_col_14_15.tif	240.21312	0	1	3	1	0.8471954	26.61094
b1395	0	Experiment 14	Stack_col_14_15.tif	238.57777	0	1	3	1	0.7974522	20.540085
b1396	0	Experiment 14	Stack_col_14_15.tif	236.75	0	1	3	1	0.70305085	30.63451
b1397	0	Experiment 14	Stack_col_14_15.tif	246.68254	0	1	3	1	0.7377081	36.34872
b1398	0	Experiment 14	Stack_col_14_15.tif	242.82558	1	1	3	1	0.486242	38.95598
b1399	0	Experiment 14	Stack_col_14_15.tif	242.05971	0	1	3	1	0.6900139	31.816494
b1400	0	Experiment 14	Stack_col_14_15.tif	240.29411	1	1	3	1	0.6044304	25.285545
b1401	0	Experiment 14	Stack_col_14_15.tif	242.2549	0	1	3	1	0.9348659	21.874289
b1402	0	Experiment 14	Stack_col_14_15.tif	240.81177	1	1	3	1	0.54541385	35.977654
b1403	0	Experiment 14	Stack_col_14_15.tif	244.45653	0	1	3	1	0.9126108	22.270405
b1404	0	Experiment 14	Stack_col_14_15.tif	241.06522	0	1	3	1	0.8533686	21.740992
b1405	0	Experiment 14	Stack_col_14_15.tif	233.07547	0	1	3	1	0.67570007	23.035828
b1406	0	Experiment 14	Stack_col_14_15.tif	240.55814	1	1	3	1	0.94868827	18.589334
b1407	0	Experiment 14	Stack_col_14_15.tif	243.83516	1	1	3	1	0.44033185	40.567715
b1408	0	Experiment 14	Stack_col_14_15.tif	244.2	1	1	3	1	0.91792065	19.554426
b1409	0	Experiment 14	Stack_col_14_15.tif	237.38235	0	1	3	1	0.94939274	13.5378895
b1410	0	Experiment 14	Stack_col_14_15.tif	242.25	1	1	3	1	0.73786336	37.23713
b1411	0	Experiment 14	Stack_col_14_15.tif	237.12659	1	1	3	1	0.31882912	40.07747
b1412	0	Experiment 14	Stack_col_14_15.tif	243.12903	0	1	3	1	0.41674292	28.486452
b1413	0	Experiment 14	Stack_col_14_15.tif	238.0339	0	1	3	1	0.67969066	26.725231
b1414	0	Experiment 14	Stack_col_14_15.tif	240.43077	0	1	3	1	0.8896044	30.25803
b1415	0	Experiment 14	Stack_col_14_15.tif	241.875	0	1	3	1	0.6659213	23.358515
b1416	0	Experiment 14	Stack_col_14_15.tif	234.07692	0	1	3	1	0.87510693	22.365889
b1418	0	Experiment 14	Stack_col_14_15.tif	242.61905	0	1	3	1	0.89098185	27.721437
b1419	0	Experiment 14	Stack_col_14_15.tif	236.36111	0	1	3	1	0.7069282	32.33697
b1421	0	Experiment 14	Stack_col_14_15.tif	243.71428	0	1	3	1	0.8531977	19.001266
b1422	0	Experiment 14	Stack_col_14_15.tif	244.8	1	1	3	1	0.6396288	40.850597
b1424	0	Experiment 14	Stack_col_14_15.tif	239.82353	0	1	3	1	0.91687346	23.150057
b1425	0	Experiment 14	Stack_col_14_15.tif	228.03125	0	1	3	1	0.8300889	26.499252
b1426	0	Experiment 14	Stack_col_14_15.tif	235.7111	0	1	3	1	0.9521959	18.242807
b1427	0	Experiment 14	Stack_col_14_15.tif	240.90909	1	1	3	1	0.762365	40.770565
b1428	0	Experiment 14	Stack_col_14_15.tif	242.10228	0	1	3	1	0.63841	41.68699
b1429	0	Experiment 14	Stack_col_14_15.tif	242.24286	1	1	3	1	0.5306653	30.94315
b1430	0	Experiment 14	Stack_col_14_15.tif	240.625	0	1	3	1	0.943734	17.371613
b1431	0	Experiment 14	Stack_col_14_15.tif	230.2449	0	1	3	1	0.8691233	21.748009
b1432	0	Experiment 14	Stack_col_14_15.tif	241.01923	0	1	3	1	0.84105206	22.7588
b1433	0	Experiment 14	Stack_col_14_15.tif	241.66037	0	1	3	1	0.812369	23.42579
b1434	0	Experiment 14	Stack_col_14_15.tif	246.71428	0	1	3	1	0.9121622	12.303921
b1435	0	Experiment 14	Stack_col_14_15.tif	234.07272	0	1	3	1	0.8282241	26.330065
b1436	0	Experiment 14	Stack_col_14_15.tif	244.98387	0	1	3	1	0.91356784	28.059736
b1437	0	Experiment 14	Stack_col_14_15.tif	243.07408	0	1	3	1	0.5955882	24.43417
b1438	0	Experiment 14	Stack_col_14_15.tif	242.04445	0	1	3	1	0.93549573	19.021807
b1439	0	Experiment 14	Stack_col_14_15.tif	241.22388	0	1	3	1	0.91018516	29.810501
b1440	0	Experiment 14	Stack_col_14_15.tif	239.42308	1	1	3	1	0.63458264	26.983679
b1441	0	Experiment 14	Stack_col_14_15.tif	243.6	0	1	3	1	0.79756767	31.964977
b1442	0	Experiment 14	Stack_col_14_15.tif	240.15384	0	1	3	1	0.9382716	16.909214
b1443	0	Experiment 14	Stack_col_14_15.tif	245.0879	0	1	3	1	0.66225475	40.369144
b1444	0	Experiment 14	Stack_col_14_15.tif	237.075	0	1	3	1	0.9280731	17.502052
b1445	0	Experiment 14	Stack_col_14_15.tif	242.85417	0	1	3	1	0.9259259	22.591402
b1446	0	Experiment 14	Stack_col_14_15.tif	242.2381	1	1	3	1	0.6117093	34.776382
b1447	0	Experiment 14	Stack_col_14_15.tif	240.24243	1	1	3	1	0.853853	29.55923
b1448	0	Experiment 14	Stack_col_14_15.tif	241.69798	1	1	3	1	0.42343494	67.41456
b1449	0	Experiment 14	Stack_col_14_15.tif	243.21568	0	1	3	1	0.9467105	21.413921
b1450	0	Experiment 14	Stack_col_14_15.tif	241.55	0	1	3	1	0.890121	27.272692
b1451	0	Experiment 14	Stack_col_14_15.tif	244.61363	0	1	3	1	0.9234303	18.443611
b1452	0	Experiment 14	Stack_col_14_15.tif	244.69698	0	1	3	1	0.92607003	14.354512
b1453	0	Experiment 14	Stack_col_14_15.tif	239.33333	1	1	3	1	0.66791743	27.95601
b1454	0	Experiment 14	Stack_col_14_15.tif	238.6	0	1	3	1	0.7865922	23.036404
b1455	0	Experiment 14	Stack_col_14_15.tif	242.27942	0	1	3	1	0.76870227	32.04265
b1456	0	Experiment 14	Stack_col_14_15.tif	242.93651	1	1	3	1	0.7861525	26.765223
b1457	0	Experiment 14	Stack_col_14_15.tif	244.17392	0	1	3	1	0.9928058	15.506685
b1458	0	Experiment 14	Stack_col_14_15.tif	245.29851	0	1	3	1	0.83595324	27.392807
b1459	0	Experiment 14	Stack_col_14_15.tif	233.04762	0	1	3	1	0.9316171	17.380644
b1460	0	Experiment 14	Stack_col_14_15.tif	242.08928	0	1	3	1	0.82520324	25.697351
b1461	0	Experiment 14	Stack_col_14_15.tif	241.5	0	1	3	1	0.61898893	32.337914
b1462	0	Experiment 14	Stack_col_14_15.tif	242.38889	1	1	3	1	0.8964317	17.429367
b1463	0	Experiment 14	Stack_col_14_15.tif	242.49254	1	1	3	1	0.54097486	29.547403
b1464	0	Experiment 14	Stack_col_14_15.tif	240.48148	0	1	3	1	0.87410074	12.585597
b1465	0	Experiment 14	Stack_col_14_15.tif	229.21053	0	1	3	1	0.9393382	15.491005
b1466	0	Experiment 14	Stack_col_14_15.tif	239.54546	0	1	3	1	0.5090909	34.6602
b1467	0	Experiment 14	Stack_col_14_15.tif	241.39655	0	1	3	1	0.94939494	27.2615
b1468	0	Experiment 14	Stack_col_14_15.tif	241.39215	0	1	3	1	0.88584477	23.883217
b1469	0	Experiment 14	Stack_col_14_15.tif	244.41667	0	1	3	1	0.9531784	21.275906
b1470	0	Experiment 14	Stack_col_14_15.tif	240.50943	0	1	3	1	0.9489796	23.247675
b1471	0	Experiment 14	Stack_col_14_15.tif	243.07042	1	1	3	1	0.5687928	30.879494
b1472	0	Experiment 14	Stack_col_14_15.tif	242.52942	1	1	3	1	0.75534266	31.757055
b1473	0	Experiment 14	Stack_col_14_15.tif	240.31708	0	1	3	1	0.69935405	18.87134
b1474	0	Experiment 14	Stack_col_14_15.tif	239.33606	1	1	3	1	0.26188362	56.007473
b1475	0	Experiment 14	Stack_col_14_15.tif	242.71428	0	1	3	1	0.79820627	22.25559
b1476	0	Experiment 14	Stack_col_14_15.tif	242.19298	1	1	3	1	0.95776683	25.370474
b1477	0	Experiment 14	Stack_col_14_15.tif	243.76923	0	1	3	1	0.89024746	22.114317
b1478	0	Experiment 14	Stack_col_14_15.tif	235.9	0	1	3	1	0.8446834	24.005362
b1479	0	Experiment 14	Stack_col_14_15.tif	238.01852	0	1	3	1	0.69077194	24.04984
b1480	0	Experiment 14	Stack_col_14_15.tif	240.61539	1	1	3	1	0.8984496	21.110065
b1481	0	Experiment 14	Stack_col_14_15.tif	233.89706	1	1	3	1	0.92153287	29.305628
b1482	0	Experiment 14	Stack_col_14_15.tif	231.94444	0	1	3	1	0.85910654	16.222034
b1483	0	Experiment 14	Stack_col_14_15.tif	238.39345	1	1	3	1	0.76460177	27.828953
b1484	0	Experiment 14	Stack_col_14_15.tif	235.95122	0	1	3	1	0.87965614	20.54825
b1485	0	Experiment 14	Stack_col_14_15.tif	235.78378	0	1	3	1	0.93691146	16.001146
b1486	0	Experiment 14	Stack_col_14_15.tif	229.33333	0	1	3	1	0.7161017	33.183025
b1487	0	Experiment 14	Stack_col_14_15.tif	243.54256	0	1	3	1	0.6178331	44.998993
b1488	0	Experiment 14	Stack_col_14_15.tif	241.33928	1	1	3	1	0.70458406	25.13921
b1489	0	Experiment 14	Stack_col_14_15.tif	237.09091	0	1	3	1	0.5486308	19.926516
b1490	0	Experiment 14	Stack_col_14_15.tif	243.4	0	1	3	1	0.6881443	25.55425
b1491	0	Experiment 14	Stack_col_14_15.tif	242.34921	0	1	3	1	0.72768533	30.062113
b1492	0	Experiment 14	Stack_col_14_15.tif	242.12659	1	1	3	1	0.5924076	36.197174
b1493	0	Experiment 14	Stack_col_14_15.tif	234.68333	0	1	3	1	0.6637555	28.264874
b1494	0	Experiment 14	Stack_col_14_15.tif	243.66667	0	1	3	1	0.85269123	19.97491
b1495	0	Experiment 14	Stack_col_14_15.tif	240.63637	0	1	3	1	0.81664497	20.436749
b1496	0	Experiment 14	Stack_col_14_15.tif	242.44118	0	1	3	1	0.93428427	14.663627
b1497	0	Experiment 14	Stack_col_14_15.tif	247.02325	1	1	3	1	0.9187228	18.738321
b1498	0	Experiment 14	Stack_col_14_15.tif	233.30302	0	1	3	1	0.81956977	14.979144
b1499	0	Experiment 14	Stack_col_14_15.tif	241.9697	0	1	3	1	0.9395248	13.498209
b1500	0	Experiment 14	Stack_col_14_15.tif	241.36842	0	1	3	1	0.8807947	16.051296
b1501	0	Experiment 14	Stack_col_14_15.tif	243.09375	0	1	3	1	0.8531196	31.824366
b1502	0	Experiment 14	Stack_col_14_15.tif	243.40741	0	1	3	1	0.89277387	22.104748
b1503	0	Experiment 14	Stack_col_14_15.tif	244.21428	0	1	3	1	0.89013374	19.019487
b1504	0	Experiment 14	Stack_col_14_15.tif	241.825	1	1	3	1	0.81948423	18.060762
b1505	0	Experiment 14	Stack_col_14_15.tif	245.3871	1	1	3	1	0.7876432	29.689817
b1506	0	Experiment 14	Stack_col_14_15.tif	243.8	0	1	3	1	0.77203435	28.428076
b1507	0	Experiment 14	Stack_col_14_15.tif	244.86487	1	1	3	1	0.6900978	35.04037
b1508	0	Experiment 14	Stack_col_14_15.tif	240.51562	0	1	3	1	0.84115523	28.601313
b1509	0	Experiment 14	Stack_col_14_15.tif	241.02222	0	1	3	1	0.92341197	20.656012
b1510	0	Experiment 14	Stack_col_14_15.tif	240.25926	1	1	3	1	0.48346362	27.556074
b1511	0	Experiment 14	Stack_col_14_15.tif	242.84616	0	1	3	1	0.8721137	29.774624
b1512	0	Experiment 14	Stack_col_14_15.tif	240.45833	0	1	3	1	0.28394583	45.823963
b1513	0	Experiment 14	Stack_col_14_15.tif	244.46552	1	1	3	1	0.77162933	25.825682
b1514	0	Experiment 14	Stack_col_14_15.tif	241.19643	0	1	3	1	0.7213941	26.600807
b1515	0	Experiment 14	Stack_col_14_15.tif	242.89091	0	1	3	1	0.8558952	25.307217
b1516	0	Experiment 14	Stack_col_14_15.tif	244.11111	0	1	3	1	0.96101457	16.369257
b1517	0	Experiment 14	Stack_col_14_15.tif	242.25322	1	1	3	1	0.31402704	105.68859
b1518	0	Experiment 14	Stack_col_14_15.tif	241.45882	1	1	3	1	0.9147399	38.223175
b1519	0	Experiment 14	Stack_col_14_15.tif	242.14285	0	1	3	1	0.9130435	15.865699
b1520	0	Experiment 14	Stack_col_14_15.tif	241.05556	0	1	3	1	0.6836461	24.002167
b1521	0	Experiment 14	Stack_col_14_15.tif	241.24638	0	1	3	1	0.7540029	32.05185
b1522	0	Experiment 14	Stack_col_14_15.tif	243.98666	0	1	3	1	0.46938986	35.744892
b1523	0	Experiment 14	Stack_col_14_15.tif	242.27272	1	1	3	1	0.9150253	31.611391
b1524	0	Experiment 14	Stack_col_14_15.tif	244.23077	0	1	3	1	0.84126985	22.88633
b1525	0	Experiment 14	Stack_col_14_15.tif	242.125	0	1	3	1	0.8781726	23.145605
b1526	0	Experiment 14	Stack_col_14_15.tif	244.44444	0	1	3	1	0.89719623	38.775013
b1527	0	Experiment 14	Stack_col_14_15.tif	241.67392	0	1	3	1	0.96666664	19.676565
b1528	0	Experiment 14	Stack_col_14_15.tif	231.625	0	1	3	1	0.8869286	16.876219
b1529	0	Experiment 14	Stack_col_14_15.tif	236.44737	0	1	3	1	0.9463148	17.939772
b1530	0	Experiment 14	Stack_col_14_15.tif	238.14754	1	1	3	1	0.5973333	27.799833
b1531	0	Experiment 14	Stack_col_14_15.tif	243.43637	1	1	3	1	0.61826587	30.736116
b1532	0	Experiment 14	Stack_col_14_15.tif	233.46269	1	1	3	1	0.5462703	29.175978
b1533	0	Experiment 14	Stack_col_14_15.tif	229.89473	1	1	3	1	0.7468124	24.039146
b1534	0	Experiment 14	Stack_col_14_15.tif	242.45946	0	1	3	1	0.7831419	17.974663
b1535	0	Experiment 14	Stack_col_14_15.tif	243.45653	0	1	3	1	0.83755964	23.619478
b1536	0	Experiment 14	Stack_col_14_15.tif	234.48685	1	1	3	1	0.55406743	37.32722
b1537	0	Experiment 14	Stack_col_14_15.tif	242.30936	1	1	3	1	0.40746325	66.34571
b1538	0	Experiment 14	Stack_col_14_15.tif	244.05263	1	1	3	1	0.7364265	44.29296
b1539	0	Experiment 14	Stack_col_14_15.tif	242.15874	1	1	3	1	0.83408886	29.371675
b1540	0	Experiment 14	Stack_col_14_15.tif	242.18518	0	1	3	1	0.7030874	24.387238
b1541	0	Experiment 14	Stack_col_14_15.tif	246.24138	0	1	3	1	0.9964497	13.950403
b1542	0	Experiment 14	Stack_col_14_15.tif	246.39345	1	1	3	1	0.8429368	26.955225
b1543	0	Experiment 14	Stack_col_14_15.tif	240.32759	0	1	3	1	0.8105986	25.015821
b1544	0	Experiment 14	Stack_col_14_15.tif	236.27272	0	1	3	1	0.9701258	18.591307
b1545	0	Experiment 14	Stack_col_14_15.tif	240.93549	0	1	3	1	0.90612245	27.731314
b1546	0	Experiment 14	Stack_col_14_15.tif	242.71698	1	1	3	1	0.5714286	27.468424
b1547	0	Experiment 14	Stack_col_14_15.tif	237.3158	0	1	3	1	0.80883867	26.214281
b1548	0	Experiment 14	Stack_col_14_15.tif	242.67924	0	1	3	1	0.71428573	25.986588
b1549	0	Experiment 14	Stack_col_14_15.tif	246.0	0	1	3	1	0.90522873	18.105032
b1550	0	Experiment 14	Stack_col_14_15.tif	242.7069	0	1	3	1	0.6967742	26.243187
b1551	0	Experiment 14	Stack_col_14_15.tif	242.9579	1	1	3	1	0.657424	42.99343
b1552	0	Experiment 14	Stack_col_14_15.tif	243.30612	0	1	3	1	0.8299939	24.886858
b1553	0	Experiment 14	Stack_col_14_15.tif	243.82906	1	1	3	1	0.5480115	53.60364
b1554	0	Experiment 14	Stack_col_14_15.tif	241.23685	0	1	3	1	0.7654237	34.012028
b1555	0	Experiment 14	Stack_col_14_15.tif	241.47368	0	1	3	1	0.9375	26.043612
b1556	0	Experiment 14	Stack_col_14_15.tif	242.58621	1	1	3	1	0.6017442	25.602514
b1557	0	Experiment 14	Stack_col_14_15.tif	241.41463	0	1	3	1	0.9402262	17.605642
b1558	0	Experiment 14	Stack_col_14_15.tif	240.2069	0	1	3	1	0.9708738	12.75373
b1559	0	Experiment 14	Stack_col_14_15.tif	241.72974	0	1	3	1	0.89788735	15.674126
b1560	0	Experiment 14	Stack_col_14_15.tif	237.88235	1	1	3	1	0.7916667	24.222832
b1561	0	Experiment 14	Stack_col_14_15.tif	245.0	1	1	3	1	0.9035639	26.359112
b1562	0	Experiment 14	Stack_col_14_15.tif	243.02083	0	1	3	1	0.87969923	23.071508
b1563	0	Experiment 14	Stack_col_14_15.tif	242.17046	0	1	3	1	0.6327502	39.98464
b1564	0	Experiment 14	Stack_col_14_15.tif	232.07547	1	1	3	1	0.6899489	23.181145
b1565	0	Experiment 14	Stack_col_14_15.tif	240.18867	0	1	3	1	0.960445	24.314522
b1566	0	Experiment 14	Stack_col_14_15.tif	244.09525	0	1	3	1	0.85672516	18.075214
b1567	0	Experiment 14	Stack_col_14_15.tif	235.17392	1	1	3	1	0.82542884	22.414621
b1568	0	Experiment 14	Stack_col_14_15.tif	243.2439	0	1	3	1	0.98191	17.495378
b1569	0	Experiment 14	Stack_col_14_15.tif	236.84746	0	1	3	1	0.37327653	58.321114
b1570	0	Experiment 14	Stack_col_14_15.tif	241.53847	1	1	3	1	0.5950787	38.40631
b1571	0	Experiment 14	Stack_col_14_15.tif	241.04256	0	1	3	1	0.896	21.365786
b1572	0	Experiment 14	Stack_col_14_15.tif	241.98215	1	1	3	1	0.9507042	24.765972
b1573	0	Experiment 14	Stack_col_14_15.tif	243.52632	0	1	3	1	0.7587182	24.33631
b1574	0	Experiment 14	Stack_col_14_15.tif	239.08475	1	1	3	1	0.53571427	27.518702
b1575	0	Experiment 14	Stack_col_14_15.tif	241.175	0	1	3	1	0.8852459	17.804024
b1576	0	Experiment 14	Stack_col_14_15.tif	237.68628	0	1	3	1	0.68367344	24.53699
b1577	0	Experiment 14	Stack_col_14_15.tif	234.17647	1	1	3	1	0.85790884	16.91177
b1578	0	Experiment 14	Stack_col_14_15.tif	241.45454	0	1	3	1	0.89097744	14.860552
b1579	0	Experiment 14	Stack_col_14_15.tif	243.77586	0	1	3	1	0.91045547	28.378702
b1580	0	Experiment 14	Stack_col_14_15.tif	235.75308	1	1	3	1	0.60301507	35.260525
b1581	0	Experiment 14	Stack_col_14_15.tif	240.34483	0	1	3	1	0.8949672	17.074327
b1582	0	Experiment 14	Stack_col_14_15.tif	242.76576	1	1	3	1	0.62715703	49.956455
b1584	0	Experiment 14	Stack_col_14_15.tif	232.06451	1	1	3	1	0.88285714	27.305363
b1590	0	Experiment 14	Stack_col_14_15.tif	236.36539	1	1	4	1	0.6276245	24.763962
b1591	0	Experiment 14	Stack_col_14_15.tif	244.2	0	1	4	1	0.99825317	16.712427
b1592	0	Experiment 14	Stack_col_14_15.tif	236.52272	0	1	4	1	0.8350004	20.428625
b1593	0	Experiment 14	Stack_col_14_15.tif	244.15384	1	1	4	1	0.48075497	35.808258
b1594	0	Experiment 14	Stack_col_14_15.tif	237.37288	1	1	4	1	0.6670243	28.649862
b1595	0	Experiment 14	Stack_col_14_15.tif	242.70909	0	1	4	1	0.78703165	24.276766
b1596	0	Experiment 14	Stack_col_14_15.tif	241.85454	0	1	4	1	0.63722557	26.068718
b1597	0	Experiment 14	Stack_col_14_15.tif	237.60318	0	1	4	1	0.54445606	30.276316
b1598	0	Experiment 14	Stack_col_14_15.tif	237.48936	1	1	4	1	0.902911	23.432043
b1599	0	Experiment 14	Stack_col_14_15.tif	241.53125	0	1	4	1	0.5290456	32.789425
b1600	0	Experiment 14	Stack_col_14_15.tif	243.91304	0	1	4	1	0.919657	20.24988
b1601	0	Experiment 14	Stack_col_14_15.tif	246.42667	0	1	4	1	0.8625221	33.468296
b1602	0	Experiment 14	Stack_col_14_15.tif	238.2037	1	1	4	1	0.7367012	25.766619
b1603	0	Experiment 14	Stack_col_14_15.tif	241.90805	0	1	4	1	0.40480018	41.896503
b1604	0	Experiment 14	Stack_col_14_15.tif	233.18292	1	1	4	1	0.5177974	36.47879
b1605	0	Experiment 14	Stack_col_14_15.tif	238.0	0	1	4	1	0.54838234	38.862328
b1606	0	Experiment 14	Stack_col_14_15.tif	230.51724	0	1	4	1	0.99151987	13.554229
b1607	0	Experiment 14	Stack_col_14_15.tif	237.6129	0	1	4	1	0.8268501	29.553913
b1608	0	Experiment 14	Stack_col_14_15.tif	233.6923	0	1	4	1	0.959269	23.938396
b1609	0	Experiment 14	Stack_col_14_15.tif	238.42105	0	1	4	1	0.4973288	37.288544
b1610	0	Experiment 14	Stack_col_14_15.tif	240.79245	0	1	4	1	0.8356963	25.736721
b1611	0	Experiment 14	Stack_col_14_15.tif	241.0	1	1	4	1	0.8660724	27.33536
b1612	0	Experiment 14	Stack_col_14_15.tif	240.45284	1	1	4	1	0.86516654	23.335066
b1613	0	Experiment 14	Stack_col_14_15.tif	232.42372	0	1	4	1	0.6108895	26.989697
b1614	0	Experiment 14	Stack_col_14_15.tif	240.85715	0	1	4	1	0.7563424	22.082808
b1615	0	Experiment 14	Stack_col_14_15.tif	241.68494	0	1	4	1	0.5216491	33.399303
b1616	0	Experiment 14	Stack_col_14_15.tif	241.08475	1	1	4	1	0.7993507	26.915749
b1617	0	Experiment 14	Stack_col_14_15.tif	244.91176	0	1	4	1	0.85835963	32.660038
b1618	0	Experiment 14	Stack_col_14_15.tif	237.5577	0	1	4	1	0.7868673	24.415915
b1619	0	Experiment 14	Stack_col_14_15.tif	245.54167	0	1	4	1	0.8650917	21.277302
b1620	0	Experiment 14	Stack_col_14_15.tif	239.75862	1	1	4	1	0.69126254	26.993378
b1621	0	Experiment 14	Stack_col_14_15.tif	241.04082	0	1	4	1	0.87328875	21.10447
b1622	0	Experiment 14	Stack_col_14_15.tif	237.75735	1	1	4	1	0.33370927	62.897354
b1623	0	Experiment 14	Stack_col_14_15.tif	235.14815	0	1	4	1	0.73054606	22.1613
b1624	0	Experiment 14	Stack_col_14_15.tif	238.88461	0	1	4	1	0.7856229	24.895105
b1625	0	Experiment 14	Stack_col_14_15.tif	242.09302	0	1	4	1	0.89017123	18.030098
b1626	0	Experiment 14	Stack_col_14_15.tif	237.8	0	1	4	1	0.98675096	10.784567
b1627	0	Experiment 14	Stack_col_14_15.tif	234.04347	0	1	4	1	0.866623	19.822618
b1628	0	Experiment 14	Stack_col_14_15.tif	239.34146	0	1	4	1	0.7487574	18.40212
b1629	0	Experiment 14	Stack_col_14_15.tif	233.86363	0	1	4	1	0.8344833	21.304176
b1630	0	Experiment 14	Stack_col_14_15.tif	228.57143	0	1	4	1	0.92521006	24.007639
b1631	0	Experiment 14	Stack_col_14_15.tif	239.4	0	1	4	1	0.8846847	14.699538
b1632	0	Experiment 14	Stack_col_14_15.tif	241.84126	0	1	4	1	0.9228154	26.891232
b1633	0	Experiment 14	Stack_col_14_15.tif	230.39655	1	1	4	1	0.880333	29.85783
b1634	0	Experiment 14	Stack_col_14_15.tif	242.2	0	1	4	1	0.9114695	18.363163
b1635	0	Experiment 14	Stack_col_14_15.tif	233.33333	1	1	4	1	0.8149298	22.880419
b1636	0	Experiment 14	Stack_col_14_15.tif	242.05084	1	1	4	1	0.8989952	24.806736
b1637	0	Experiment 14	Stack_col_14_15.tif	244.15384	0	1	4	1	0.86209816	15.786603
b1638	0	Experiment 14	Stack_col_14_15.tif	236.28125	0	1	4	1	0.8296614	29.940897
b1639	0	Experiment 14	Stack_col_14_15.tif	243.60527	0	1	4	1	0.92860895	16.775059
b1640	0	Experiment 14	Stack_col_14_15.tif	244.15	1	1	4	1	0.8568119	24.744078
b1641	0	Experiment 14	Stack_col_14_15.tif	245.38235	0	1	4	1	0.92105263	14.451216
b1642	0	Experiment 14	Stack_col_14_15.tif	239.33333	0	1	4	1	0.93512714	21.55996
b1643	0	Experiment 14	Stack_col_14_15.tif	234.29167	1	1	4	1	0.71131676	35.1689
b1644	0	Experiment 14	Stack_col_14_15.tif	242.87755	0	1	4	1	0.89826226	20.624165
b1645	0	Experiment 14	Stack_col_14_15.tif	243.53192	1	1	4	1	0.86256975	21.356886
b1646	0	Experiment 14	Stack_col_14_15.tif	235.2987	1	1	4	1	0.86256593	33.619278
b1647	0	Experiment 14	Stack_col_14_15.tif	238.2973	0	1	4	1	0.73556453	15.9699135
b1648	0	Experiment 14	Stack_col_14_15.tif	237.41304	0	1	4	1	0.74971294	19.943144
b1649	0	Experiment 14	Stack_col_14_15.tif	243.425	1	1	4	1	0.9348793	18.098005
b1650	0	Experiment 14	Stack_col_14_15.tif	244.43243	0	1	4	1	0.9413125	18.398674
b1651	0	Experiment 14	Stack_col_14_15.tif	234.79591	0	1	4	1	0.91774344	22.4514
b1652	0	Experiment 14	Stack_col_14_15.tif	240.65	0	1	4	1	0.86456805	19.024231
b1653	0	Experiment 14	Stack_col_14_15.tif	241.73509	1	1	4	1	0.2368758	70.132065
b1654	0	Experiment 14	Stack_col_14_15.tif	244.4375	0	1	4	1	0.70029676	22.095219
b1655	0	Experiment 14	Stack_col_14_15.tif	239.31818	0	1	4	1	0.80604327	30.940723
b1656	0	Experiment 14	Stack_col_14_15.tif	243.42857	0	1	4	1	0.7735223	31.026825
b1657	0	Experiment 14	Stack_col_14_15.tif	243.39536	0	1	4	1	0.93167704	19.245756
b1658	0	Experiment 14	Stack_col_14_15.tif	240.875	1	1	4	1	0.89783025	26.985672
b1659	0	Experiment 14	Stack_col_14_15.tif	243.24	0	1	4	1	0.8492987	22.485289
b1660	0	Experiment 14	Stack_col_14_15.tif	246.86208	0	1	4	1	0.9264448	13.455191
b1661	0	Experiment 14	Stack_col_14_15.tif	240.27586	0	1	4	1	0.65195894	26.090113
b1662	0	Experiment 14	Stack_col_14_15.tif	243.67647	1	1	4	1	0.5729997	34.58306
b1663	0	Experiment 14	Stack_col_14_15.tif	241.15094	1	1	4	1	0.85245264	24.408081
b1664	0	Experiment 14	Stack_col_14_15.tif	242.53334	0	1	4	1	0.6980118	19.768526
b1665	0	Experiment 14	Stack_col_14_15.tif	233.72414	1	1	4	1	0.6597573	37.77907
b1666	0	Experiment 14	Stack_col_14_15.tif	240.60715	0	1	4	1	0.7484163	26.904799
b1667	0	Experiment 14	Stack_col_14_15.tif	240.91379	0	1	4	1	0.72079	27.979656
b1668	0	Experiment 14	Stack_col_14_15.tif	235.51219	0	1	4	1	0.7982262	16.734695
b1669	0	Experiment 14	Stack_col_14_15.tif	241.33803	0	1	4	1	0.878903	33.28268
b1670	0	Experiment 14	Stack_col_14_15.tif	238.28378	0	1	4	1	0.5966249	33.33771
b1671	0	Experiment 14	Stack_col_14_15.tif	228.75555	0	1	4	1	0.9825758	19.374207
b1672	0	Experiment 14	Stack_col_14_15.tif	245.8125	0	1	4	1	0.9661757	13.584812
b1673	0	Experiment 14	Stack_col_14_15.tif	230.03125	0	1	4	1	0.9530726	13.967311
b1674	0	Experiment 14	Stack_col_14_15.tif	243.83673	1	1	4	1	0.89751554	21.731619
b1675	0	Experiment 14	Stack_col_14_15.tif	245.23438	0	1	4	1	0.5314413	30.027687
b1676	0	Experiment 14	Stack_col_14_15.tif	233.26315	0	1	4	1	0.8241536	26.310595
b1677	0	Experiment 14	Stack_col_14_15.tif	243.79518	0	1	4	1	0.668065	39.59917
b1678	0	Experiment 14	Stack_col_14_15.tif	236.71153	1	1	4	1	0.9019139	21.91208
b1679	0	Experiment 14	Stack_col_14_15.tif	232.17647	0	1	4	1	0.9480519	14.766378
b1680	0	Experiment 14	Stack_col_14_15.tif	241.85	0	1	4	1	0.9188537	19.208742
b1681	0	Experiment 14	Stack_col_14_15.tif	242.96875	0	1	4	1	0.95692885	14.039734
b1682	0	Experiment 14	Stack_col_14_15.tif	247.24324	0	1	4	1	0.93893456	16.451195
b1683	0	Experiment 14	Stack_col_14_15.tif	240.12122	0	1	4	1	0.99886876	15.494716
b1684	0	Experiment 14	Stack_col_14_15.tif	240.63266	1	1	4	1	0.8945687	21.408073
b1685	0	Experiment 14	Stack_col_14_15.tif	238.8421	0	1	4	1	0.8346395	17.27177
b1686	0	Experiment 14	Stack_col_14_15.tif	241.68518	0	1	4	1	0.50821394	57.4725
b1687	0	Experiment 14	Stack_col_14_15.tif	245.54167	0	1	4	1	0.5661047	33.610817
b1688	0	Experiment 14	Stack_col_14_15.tif	240.29411	0	1	4	1	0.84534883	22.36013
b1689	0	Experiment 14	Stack_col_14_15.tif	241.6129	1	1	4	1	0.66885155	28.492273
b1690	0	Experiment 14	Stack_col_14_15.tif	241.8	0	1	4	1	0.52380043	44.169342
b1691	0	Experiment 14	Stack_col_14_15.tif	226.96297	0	1	4	1	0.57856035	23.66645
b1692	0	Experiment 14	Stack_col_14_15.tif	241.29167	0	1	4	1	0.7101944	24.171534
b1693	0	Experiment 14	Stack_col_14_15.tif	242.39655	0	1	4	1	0.7681693	25.280613
b1694	0	Experiment 14	Stack_col_14_15.tif	238.48611	1	1	4	1	0.6658163	33.770786
b1695	0	Experiment 14	Stack_col_14_15.tif	239.55556	0	1	4	1	0.92885375	12.368159
b1696	0	Experiment 14	Stack_col_14_15.tif	243.06667	0	1	4	1	0.93454546	28.280025
b1697	0	Experiment 14	Stack_col_14_15.tif	236.8421	0	1	4	1	0.846636	15.964174
b1698	0	Experiment 14	Stack_col_14_15.tif	240.59575	1	1	4	1	0.8570525	22.10355
b1699	0	Experiment 14	Stack_col_14_15.tif	230.31068	0	1	4	1	0.66837823	44.756664
b1700	0	Experiment 14	Stack_col_14_15.tif	241.50769	0	1	4	1	0.73553085	29.79715
b1701	0	Experiment 14	Stack_col_14_15.tif	242.09525	1	1	4	1	0.59942085	39.44602
b1702	0	Experiment 14	Stack_col_14_15.tif	242.14865	1	1	4	1	0.5025539	37.886257
b1703	0	Experiment 14	Stack_col_14_15.tif	239.5	0	1	4	1	0.6800365	23.31117
b1704	0	Experiment 14	Stack_col_14_15.tif	242.73334	0	1	4	1	0.7618165	17.093706
b1705	0	Experiment 14	Stack_col_14_15.tif	238.24074	0	1	4	1	0.5803846	23.596521
b1706	0	Experiment 14	Stack_col_14_15.tif	243.16667	0	1	4	1	0.97208536	18.288305
b1707	0	Experiment 14	Stack_col_14_15.tif	229.98215	0	1	4	1	0.9048244	23.070578
b1708	0	Experiment 14	Stack_col_14_15.tif	238.73914	0	1	4	1	0.84887457	21.985062
b1709	0	Experiment 14	Stack_col_14_15.tif	236.23529	0	1	4	1	0.8161233	22.902689
b1710	0	Experiment 14	Stack_col_14_15.tif	241.06818	1	1	4	1	0.7271709	21.739096
b1711	0	Experiment 14	Stack_col_14_15.tif	228.94737	0	1	4	1	0.86315787	25.132236
b1712	0	Experiment 14	Stack_col_14_15.tif	241.15555	0	1	4	1	0.9678973	15.004526
b1713	0	Experiment 14	Stack_col_14_15.tif	242.40244	1	1	4	1	0.6481339	37.87727
b1714	0	Experiment 14	Stack_col_14_15.tif	229.8	0	1	4	1	0.8882936	25.87614
b1715	0	Experiment 14	Stack_col_14_15.tif	238.10294	1	1	4	1	0.5072614	31.906033
b1716	0	Experiment 14	Stack_col_14_15.tif	240.71739	1	1	4	1	0.88340193	20.395529
b1717	0	Experiment 14	Stack_col_14_15.tif	238.6	0	1	4	1	0.8510753	26.157759
b1718	0	Experiment 14	Stack_col_14_15.tif	235.09435	0	1	4	1	0.90005696	25.253853
b1719	0	Experiment 14	Stack_col_14_15.tif	239.43373	0	1	4	1	0.43178672	39.111362
b1720	0	Experiment 14	Stack_col_14_15.tif	240.76596	0	1	4	1	0.910221	19.876074
b1721	0	Experiment 14	Stack_col_14_15.tif	240.25	0	1	4	1	0.7668823	22.669556
b1722	0	Experiment 14	Stack_col_14_15.tif	239.14465	1	1	4	1	0.1888013	74.675835
b1723	0	Experiment 14	Stack_col_14_15.tif	242.95294	1	1	4	1	0.5558487	37.819096
b1724	0	Experiment 14	Stack_col_14_15.tif	240.863	1	1	4	1	0.7323139	35.78168
b1725	0	Experiment 14	Stack_col_14_15.tif	242.39655	1	1	4	1	0.8422576	28.413317
b1726	0	Experiment 14	Stack_col_14_15.tif	242.80392	0	1	4	1	0.73759544	24.256002
b1727	0	Experiment 14	Stack_col_14_15.tif	243.06451	0	1	4	1	0.84663	29.156197
b1728	0	Experiment 14	Stack_col_14_15.tif	231.17188	1	1	4	1	0.6733033	31.293804
b1729	0	Experiment 14	Stack_col_14_15.tif	244.44643	1	1	4	1	0.5088183	27.498205
b1730	0	Experiment 14	Stack_col_14_15.tif	240.48485	0	1	4	1	0.8860878	28.664896
b1731	0	Experiment 14	Stack_col_14_15.tif	239.20454	0	1	4	1	0.8902439	20.821983
b1732	0	Experiment 14	Stack_col_14_15.tif	240.61818	0	1	4	1	0.56318784	23.91273
b1733	0	Experiment 14	Stack_col_14_15.tif	244.4386	0	1	4	1	0.8743573	25.310339
b1734	0	Experiment 14	Stack_col_14_15.tif	238.09677	1	1	4	1	0.7526205	30.371866
b1735	0	Experiment 14	Stack_col_14_15.tif	241.1579	0	1	4	1	0.8342413	21.401535
b1736	0	Experiment 14	Stack_col_14_15.tif	241.52873	1	1	4	1	0.5632184	42.49351
b1737	0	Experiment 14	Stack_col_14_15.tif	240.6875	1	1	4	1	0.5044444	26.540722
b1738	0	Experiment 14	Stack_col_14_15.tif	240.15	0	1	4	1	0.97197896	16.86457
b1739	0	Experiment 14	Stack_col_14_15.tif	222.80952	0	1	4	1	0.9852941	18.625982
b1740	0	Experiment 14	Stack_col_14_15.tif	246.02127	0	1	4	1	0.9138627	20.31751
b1741	0	Experiment 14	Stack_col_14_15.tif	240.75676	0	1	4	1	0.96192384	14.484732
b1742	0	Experiment 14	Stack_col_14_15.tif	242.76271	0	1	4	1	0.81633574	27.56967
b1743	0	Experiment 14	Stack_col_14_15.tif	244.31372	0	1	4	1	0.6666667	25.377737
b1744	0	Experiment 14	Stack_col_14_15.tif	240.45	0	1	4	1	0.9134217	18.041456
b1745	0	Experiment 14	Stack_col_14_15.tif	239.2449	0	1	4	1	0.93757963	23.93021
b1746	0	Experiment 14	Stack_col_14_15.tif	243.38637	0	1	4	1	0.73672056	23.372437
b1747	0	Experiment 14	Stack_col_14_15.tif	235.68254	0	1	4	1	0.60022986	27.92211
b1748	0	Experiment 14	Stack_col_14_15.tif	244.13637	0	1	4	1	0.78855723	20.338314
b1749	0	Experiment 14	Stack_col_14_15.tif	243.08333	0	1	4	1	0.96477497	15.753265
b1750	0	Experiment 14	Stack_col_14_15.tif	241.28572	1	1	4	1	0.8489315	34.996708
b1751	0	Experiment 14	Stack_col_14_15.tif	243.37143	0	1	4	1	0.78510636	16.570826
b1752	0	Experiment 14	Stack_col_14_15.tif	245.0	0	1	4	1	0.9188034	22.016123
b1753	0	Experiment 14	Stack_col_14_15.tif	241.78572	1	1	4	1	0.9303216	19.053677
b1754	0	Experiment 14	Stack_col_14_15.tif	244.6	1	1	4	1	0.8534012	32.463932
b1755	0	Experiment 14	Stack_col_14_15.tif	234.45454	0	1	4	1	0.89972144	28.693886
b1756	0	Experiment 14	Stack_col_14_15.tif	241.44118	0	1	4	1	0.92785573	14.38469
b1757	0	Experiment 14	Stack_col_14_15.tif	230.5	0	1	4	1	0.70289856	20.898447
b1758	0	Experiment 14	Stack_col_14_15.tif	242.32692	0	1	4	1	0.8772542	24.789665
b1759	0	Experiment 14	Stack_col_14_15.tif	241.17722	1	1	4	1	0.51084644	38.6794
b1760	0	Experiment 14	Stack_col_14_15.tif	233.89854	1	1	4	1	0.64853	29.841463
b1761	0	Experiment 14	Stack_col_14_15.tif	242.15428	1	1	4	1	0.2733009	82.433044
b1762	0	Experiment 14	Stack_col_14_15.tif	236.11111	1	1	4	1	0.7621976	28.518991
b1763	0	Experiment 14	Stack_col_14_15.tif	240.22034	0	1	4	1	0.89832723	26.265768
b1764	0	Experiment 14	Stack_col_14_15.tif	235.85294	0	1	4	1	0.90944123	15.760141
b1765	0	Experiment 14	Stack_col_14_15.tif	236.7013	0	1	4	1	0.5406936	35.673088
b1766	0	Experiment 14	Stack_col_14_15.tif	233.59877	1	1	4	1	0.3468772	78.36236
b1767	0	Experiment 14	Stack_col_14_15.tif	246.6207	0	1	4	1	0.7108731	25.973925
b1768	0	Experiment 14	Stack_col_14_15.tif	232.34883	0	1	4	1	0.94285715	18.014944
b1769	0	Experiment 14	Stack_col_14_15.tif	238.79033	1	1	4	1	0.7154973	29.765593
b1770	0	Experiment 14	Stack_col_14_15.tif	236.5	1	1	4	1	0.8806783	37.775585
b1771	0	Experiment 14	Stack_col_14_15.tif	240.96552	0	1	4	1	0.85949177	26.928679
b1772	0	Experiment 14	Stack_col_14_15.tif	235.94366	1	1	4	1	0.6779661	33.83818
b1773	0	Experiment 14	Stack_col_14_15.tif	235.51724	1	1	4	1	0.3160952	40.551834
b1774	0	Experiment 14	Stack_col_14_15.tif	238.80435	0	1	4	1	0.8817935	19.312122
b1775	0	Experiment 14	Stack_col_14_15.tif	231.43637	0	1	4	1	0.88206524	23.868702
b1776	0	Experiment 14	Stack_col_14_15.tif	243.96666	0	1	4	1	0.8669166	24.483425
b1777	0	Experiment 14	Stack_col_14_15.tif	240.1579	0	1	4	1	0.9353448	17.164454
b1778	0	Experiment 14	Stack_col_14_15.tif	237.79167	0	1	4	1	0.9618375	21.205809
b1779	0	Experiment 14	Stack_col_14_15.tif	242.10527	0	1	4	1	0.9787645	14.519907
b1780	0	Experiment 14	Stack_col_14_15.tif	246.52632	0	1	4	1	0.8595944	17.178408
b1781	0	Experiment 14	Stack_col_14_15.tif	235.34247	0	1	4	1	0.8741127	31.105177
b1782	0	Experiment 14	Stack_col_14_15.tif	230.09302	0	1	4	1	0.84853166	17.411823
b1783	0	Experiment 14	Stack_col_14_15.tif	241.2449	0	1	4	1	0.7597826	21.64139
b1784	0	Experiment 14	Stack_col_14_15.tif	237.125	1	1	4	1	0.7613065	39.314545
b1785	0	Experiment 14	Stack_col_14_15.tif	241.14285	1	1	4	1	0.57227516	40.005966
b1786	0	Experiment 14	Stack_col_14_15.tif	238.04167	0	1	4	1	0.74229544	23.838434
b1787	0	Experiment 14	Stack_col_14_15.tif	235.32692	0	1	4	1	0.9214582	24.397152
b1788	0	Experiment 14	Stack_col_14_15.tif	239.79366	0	1	4	1	0.74380165	27.829966
b1789	0	Experiment 14	Stack_col_14_15.tif	234.17545	1	1	4	1	0.7479675	26.76104
b1790	0	Experiment 14	Stack_col_14_15.tif	238.86986	0	1	4	1	0.3458126	70.4085
b1791	0	Experiment 14	Stack_col_14_15.tif	243.10909	0	1	4	1	0.92534626	25.584862
b1792	0	Experiment 14	Stack_col_14_15.tif	238.09756	0	1	4	1	0.7659864	20.192682
b1793	0	Experiment 14	Stack_col_14_15.tif	244.24074	0	1	4	1	0.7704918	25.734787
b1794	0	Experiment 14	Stack_col_14_15.tif	245.69841	1	1	4	1	0.96630067	27.154482
b1795	0	Experiment 14	Stack_col_14_15.tif	240.45238	0	1	4	1	0.86545175	19.068811
b1796	0	Experiment 14	Stack_col_14_15.tif	241.5747	0	1	4	1	0.5724079	39.244225
b1797	0	Experiment 14	Stack_col_14_15.tif	244.49057	0	1	4	1	0.7363045	25.284395
b1798	0	Experiment 14	Stack_col_14_15.tif	236.2683	1	1	4	1	0.9050884	35.294514
b1799	0	Experiment 14	Stack_col_14_15.tif	241.35417	0	1	4	1	0.7151515	23.434021
b1800	0	Experiment 14	Stack_col_14_15.tif	231.7069	1	1	4	1	0.733564	25.720657
b1801	0	Experiment 14	Stack_col_14_15.tif	244.21538	0	1	4	1	0.6068268	29.463806
b1802	0	Experiment 14	Stack_col_14_15.tif	240.93846	0	1	4	1	0.73708206	30.17838
b1803	0	Experiment 14	Stack_col_14_15.tif	239.85715	0	1	4	1	0.9080824	18.486855
b1804	0	Experiment 14	Stack_col_14_15.tif	240.63855	1	1	4	1	0.4816912	41.239994
b1805	0	Experiment 14	Stack_col_14_15.tif	235.25	1	1	4	1	0.86754966	32.934746
b1806	0	Experiment 14	Stack_col_14_15.tif	240.34883	1	1	4	1	0.78162026	19.463188
b1807	0	Experiment 14	Stack_col_14_15.tif	229.3077	0	1	4	1	0.99148935	11.552522
b1808	0	Experiment 14	Stack_col_14_15.tif	241.36046	1	1	4	1	0.6191847	40.858833
b1809	0	Experiment 14	Stack_col_14_15.tif	242.0	0	1	4	1	0.94021213	21.229408
b1810	0	Experiment 14	Stack_col_14_15.tif	242.98215	0	1	4	1	0.8809001	24.089722
b1811	0	Experiment 14	Stack_col_14_15.tif	236.43243	0	1	4	1	0.91124	14.658801
b1812	0	Experiment 14	Stack_col_14_15.tif	242.73529	0	1	4	1	0.81438124	15.3322935
b1813	0	Experiment 14	Stack_col_14_15.tif	241.82759	0	1	4	1	0.93119264	13.566121
b1814	0	Experiment 14	Stack_col_14_15.tif	243.16667	0	1	4	1	0.72807884	23.547493
b1815	0	Experiment 14	Stack_col_14_15.tif	244.97826	0	1	4	1	0.8902459	20.581062
b1816	0	Experiment 14	Stack_col_14_15.tif	235.60976	0	1	4	1	0.79710144	16.547016
b1817	0	Experiment 14	Stack_col_14_15.tif	241.4	0	1	4	1	0.9117647	25.11499
b1818	0	Experiment 14	Stack_col_14_15.tif	240.36363	0	1	4	1	0.5645046	28.244926
b1819	0	Experiment 14	Stack_col_14_15.tif	242.53226	1	1	4	1	0.8759259	29.302458
b1820	0	Experiment 14	Stack_col_14_15.tif	240.56863	0	1	4	1	0.7586207	24.397816
b1821	0	Experiment 14	Stack_col_14_15.tif	234.61539	0	1	4	1	0.9581882	18.8174
b1822	0	Experiment 14	Stack_col_14_15.tif	231.97058	0	1	4	1	0.76387805	29.792562
b1823	0	Experiment 14	Stack_col_14_15.tif	232.72728	1	1	4	1	0.7692308	21.748686
b1824	0	Experiment 14	Stack_col_14_15.tif	236.7451	0	1	4	1	0.7251908	24.276869
b1825	0	Experiment 14	Stack_col_14_15.tif	228.35938	1	1	4	1	0.923001	27.046284
b1826	0	Experiment 14	Stack_col_14_15.tif	239.18182	0	1	4	1	0.973494	18.899405
b1827	0	Experiment 14	Stack_col_14_15.tif	241.42223	1	1	4	1	0.93916917	21.517487
b1828	0	Experiment 14	Stack_col_14_15.tif	242.43182	0	1	4	1	0.9030471	19.537687
b1829	0	Experiment 14	Stack_col_14_15.tif	232.575	0	1	4	1	0.92720973	16.08567
b1830	0	Experiment 14	Stack_col_14_15.tif	243.41667	1	1	4	1	0.8597599	21.932785
b1831	0	Experiment 14	Stack_col_14_15.tif	233.35715	0	1	4	1	0.9544715	19.818882
b1832	0	Experiment 14	Stack_col_14_15.tif	239.65152	1	1	4	1	0.5865497	33.212055
b1833	0	Experiment 14	Stack_col_14_15.tif	242.71428	0	1	4	1	0.9055728	18.312082
b1834	0	Experiment 14	Stack_col_14_15.tif	242.29268	0	1	4	1	0.87462234	17.045807
b1835	0	Experiment 14	Stack_col_14_15.tif	238.78049	0	1	4	1	0.81556195	19.436352
b1836	0	Experiment 14	Stack_col_14_15.tif	233.94286	0	1	4	1	0.85883623	45.297283
b1837	0	Experiment 14	Stack_col_14_15.tif	240.23438	1	1	4	1	0.8922652	31.607046
b1838	0	Experiment 14	Stack_col_14_15.tif	241.32076	0	1	4	1	0.8042328	23.454681
b1839	0	Experiment 14	Stack_col_14_15.tif	233.37209	1	1	4	1	0.79144734	22.753521
b1840	0	Experiment 14	Stack_col_14_15.tif	232.8	0	1	4	1	0.8818444	18.858452
b1841	0	Experiment 14	Stack_col_14_15.tif	234.98215	1	1	4	1	0.85520834	24.447304
b1842	0	Experiment 14	Stack_col_14_15.tif	240.56522	0	1	4	1	0.82550335	30.922884
b1843	0	Experiment 14	Stack_col_14_15.tif	234.38333	1	1	4	1	0.89827543	27.934135
b1844	0	Experiment 14	Stack_col_14_15.tif	235.40425	0	1	4	1	0.86567163	20.840591
b1845	0	Experiment 14	Stack_col_14_15.tif	231.35556	0	1	4	1	0.70945656	22.02633
b1846	0	Experiment 14	Stack_col_14_15.tif	246.325	0	1	4	1	0.8954155	21.69716
b1847	0	Experiment 14	Stack_col_14_15.tif	243.63637	0	1	4	1	0.92466766	18.162521
b1848	0	Experiment 14	Stack_col_14_15.tif	242.95699	1	1	4	1	0.60954815	40.002052
b1849	0	Experiment 14	Stack_col_14_15.tif	242.17741	0	1	4	1	0.87007874	26.127007
b1850	0	Experiment 14	Stack_col_14_15.tif	239.73685	0	1	4	1	0.79041916	16.606031
b1851	0	Experiment 14	Stack_col_14_15.tif	236.24753	1	1	4	1	0.33509701	48.93703
b1852	0	Experiment 14	Stack_col_14_15.tif	241.95161	1	1	4	1	0.82965577	30.107283
b1853	0	Experiment 14	Stack_col_14_15.tif	240.69768	0	1	4	1	0.7493976	20.0944
b1854	0	Experiment 14	Stack_col_14_15.tif	239.11111	1	1	4	1	0.6651786	27.942844
b1855	0	Experiment 14	Stack_col_14_15.tif	244.63235	1	1	4	1	0.7078498	30.611486
b1856	0	Experiment 14	Stack_col_14_15.tif	232.09616	0	1	4	1	0.93363994	21.556627
b1857	0	Experiment 14	Stack_col_14_15.tif	239.89285	0	1	4	1	0.92574257	12.511752
b1858	0	Experiment 14	Stack_col_14_15.tif	239.33333	0	1	4	1	0.9831461	14.395511
b1859	0	Experiment 14	Stack_col_14_15.tif	234.74748	0	1	4	1	0.32950023	41.49842
b1860	0	Experiment 14	Stack_col_14_15.tif	240.33333	0	1	4	1	0.91769546	19.076323
b1861	0	Experiment 14	Stack_col_14_15.tif	240.83333	0	1	4	1	0.78004533	23.340193
b1862	0	Experiment 14	Stack_col_14_15.tif	222.48781	0	1	4	1	0.92637116	20.54872
b1863	0	Experiment 14	Stack_col_14_15.tif	231.02222	0	1	4	1	0.9534185	18.931042
b1864	0	Experiment 14	Stack_col_14_15.tif	241.7541	0	1	4	1	0.8502825	27.922089
b1865	0	Experiment 14	Stack_col_14_15.tif	231.0	0	1	4	1	0.9338454	24.838385
b1866	0	Experiment 14	Stack_col_14_15.tif	241.39131	1	1	4	1	0.7065744	32.034046
b1867	0	Experiment 14	Stack_col_14_15.tif	232.68056	0	1	4	1	0.92968273	27.84156
b1868	0	Experiment 14	Stack_col_14_15.tif	242.15094	1	1	4	1	0.7593152	24.110397
b1869	0	Experiment 14	Stack_col_14_15.tif	233.79662	0	1	4	1	0.8963283	24.278904
b1870	0	Experiment 14	Stack_col_14_15.tif	239.30952	0	1	4	1	0.96231365	16.37865
b1871	0	Experiment 14	Stack_col_14_15.tif	236.80952	0	1	4	1	0.49056605	28.404762
b1872	0	Experiment 14	Stack_col_14_15.tif	243.11864	1	1	4	1	0.41633663	31.625675
b1873	0	Experiment 14	Stack_col_14_15.tif	241.65218	0	1	4	1	0.81257415	21.89603
b1874	0	Experiment 14	Stack_col_14_15.tif	234.13637	1	1	4	1	0.923019	18.051136
b1875	0	Experiment 14	Stack_col_14_15.tif	240.25316	0	1	4	1	0.7849315	34.959156
b1876	0	Experiment 14	Stack_col_14_15.tif	243.22223	1	1	4	1	0.6489627	26.242966
b1877	0	Experiment 14	Stack_col_14_15.tif	238.48077	1	1	4	1	0.9342561	22.526121
b1878	0	Experiment 14	Stack_col_14_15.tif	233.0	0	1	4	1	0.9805951	22.312988
b1879	0	Experiment 14	Stack_col_14_15.tif	239.75	0	1	4	1	0.85714287	16.757635
b1880	0	Experiment 14	Stack_col_14_15.tif	239.15152	0	1	4	1	0.9189189	16.096395
b1881	0	Experiment 14	Stack_col_14_15.tif	241.65218	0	1	4	1	0.9708879	20.415598
b1882	0	Experiment 14	Stack_col_14_15.tif	245.13637	0	1	4	1	0.7994792	21.871124
b1883	0	Experiment 14	Stack_col_14_15.tif	242.325	0	1	4	1	0.47916368	40.34722
b1884	0	Experiment 14	Stack_col_14_15.tif	244.49045	0	1	4	1	0.65444887	70.73221
b1885	0	Experiment 14	Stack_col_14_15.tif	237.875	0	1	4	1	0.21774559	62.965683
b1886	0	Experiment 14	Stack_col_14_15.tif	240.19318	0	1	4	1	0.75128645	40.255344
b1887	0	Experiment 14	Stack_col_14_15.tif	229.9	1	1	4	1	0.9470305	28.967306
b1888	0	Experiment 14	Stack_col_14_15.tif	241.09259	1	1	4	1	0.8211207	24.34248
b1889	0	Experiment 14	Stack_col_14_15.tif	235.26	0	1	4	1	0.6806807	19.331776
b1890	0	Experiment 14	Stack_col_14_15.tif	241.64815	0	1	4	1	0.9600939	25.133856
b1891	0	Experiment 14	Stack_col_14_15.tif	240.47058	1	1	4	1	0.83973837	31.261623
b1892	0	Experiment 14	Stack_col_14_15.tif	242.29688	1	1	4	1	0.7484568	31.039255
b1893	0	Experiment 14	Stack_col_14_15.tif	238.87878	0	1	4	1	0.74820143	30.556078
b1894	0	Experiment 14	Stack_col_14_15.tif	246.41539	0	1	4	1	0.8272727	28.416733
b1895	0	Experiment 14	Stack_col_14_15.tif	238.7284	1	1	4	1	0.6989781	38.996185
b1896	0	Experiment 14	Stack_col_14_15.tif	235.975	0	1	4	1	0.97923875	18.278069
b1897	0	Experiment 14	Stack_col_14_15.tif	240.2	0	1	4	1	0.92016804	13.701147
b1898	0	Experiment 14	Stack_col_14_15.tif	241.18367	1	1	4	1	0.5460649	43.07935
b1899	0	Experiment 14	Stack_col_14_15.tif	233.32433	0	1	4	1	0.9612403	16.46356
b1900	0	Experiment 14	Stack_col_14_15.tif	238.69412	1	1	4	1	0.7772397	40.98857
b1901	0	Experiment 14	Stack_col_14_15.tif	233.0921	1	1	4	1	0.9136578	34.80929
b1902	0	Experiment 14	Stack_col_14_15.tif	246.10811	0	1	4	1	0.8424242	16.939877
b1903	0	Experiment 14	Stack_col_14_15.tif	242.01785	0	1	4	1	0.904814	27.713875
b1904	0	Experiment 14	Stack_col_14_15.tif	243.0	0	1	4	1	0.77512956	22.579336
b1905	0	Experiment 14	Stack_col_14_15.tif	236.31915	0	1	4	1	0.7342342	21.225372
b1907	0	Experiment 14	Stack_col_14_15.tif	241.69136	1	1	4	1	0.3893055	36.53455
b1908	0	Experiment 14	Stack_col_14_15.tif	242.94339	0	1	4	1	0.83842796	22.77615
b1909	0	Experiment 14	Stack_col_14_15.tif	237.12308	0	1	4	1	0.53333336	29.162825
b1910	0	Experiment 14	Stack_col_14_15.tif	237.52272	0	1	4	1	0.8324022	19.320408
b1911	0	Experiment 14	Stack_col_14_15.tif	243.36363	0	1	4	1	0.9493671	24.722813
b1912	0	Experiment 14	Stack_col_14_15.tif	244.95918	0	1	4	1	0.7399738	23.574669
b1913	0	Experiment 14	Stack_col_14_15.tif	238.82051	0	1	4	1	0.93594307	16.894749
b1914	0	Experiment 14	Stack_col_14_15.tif	241.86667	0	1	4	1	0.83935744	23.97839
b1915	0	Experiment 14	Stack_col_14_15.tif	237.86441	0	1	4	1	0.8294011	25.239864
b1916	0	Experiment 14	Stack_col_14_15.tif	236.04716	1	1	4	1	0.43567568	46.974697
b1917	0	Experiment 14	Stack_col_14_15.tif	241.7931	1	1	4	1	0.8785425	23.70899
b1918	0	Experiment 14	Stack_col_14_15.tif	238.9375	0	1	4	1	0.93562233	13.990764
b1919	0	Experiment 14	Stack_col_14_15.tif	241.92	1	1	4	1	0.83247864	22.611195
b1920	0	Experiment 14	Stack_col_14_15.tif	242.0	0	1	4	1	0.9624357	20.307665
b1921	0	Experiment 14	Stack_col_14_15.tif	240.7848	0	1	4	1	0.69906324	37.50249
b1922	0	Experiment 14	Stack_col_14_15.tif	240.33696	1	1	4	1	0.5552124	43.371925
b1923	0	Experiment 14	Stack_col_14_15.tif	247.58064	1	1	4	1	0.85897434	27.74667
b1924	0	Experiment 14	Stack_col_14_15.tif	240.85715	0	1	4	1	0.37468982	56.433876
b1925	0	Experiment 14	Stack_col_14_15.tif	243.44444	1	1	4	1	0.6854962	25.040588
b1926	0	Experiment 14	Stack_col_14_15.tif	243.24794	0	1	4	1	0.5440076	57.737144
b1927	0	Experiment 14	Stack_col_14_15.tif	241.30232	0	1	4	1	0.8418079	20.985594
b1928	0	Experiment 14	Stack_col_14_15.tif	243.36986	1	1	4	1	0.7855596	31.540556
b1929	0	Experiment 14	Stack_col_14_15.tif	243.93814	1	1	4	1	0.720908	43.563576
b1930	0	Experiment 14	Stack_col_14_15.tif	238.96666	0	1	4	1	0.9285714	25.568281
b1931	0	Experiment 14	Stack_col_14_15.tif	239.51923	1	1	4	1	0.6672535	33.08185
b1932	0	Experiment 14	Stack_col_14_15.tif	241.34483	0	1	4	1	0.98421055	11.603855
b1933	0	Experiment 14	Stack_col_14_15.tif	242.5625	0	1	4	1	0.7956044	23.519789
b1934	0	Experiment 14	Stack_col_14_15.tif	232.79546	0	1	4	1	0.9046243	20.193022
b1935	0	Experiment 14	Stack_col_14_15.tif	240.44444	0	1	4	1	0.70393044	33.822624
b1936	0	Experiment 14	Stack_col_14_15.tif	244.5238	0	1	4	1	0.8769047	17.941282
b1937	0	Experiment 14	Stack_col_14_15.tif	239.70454	0	1	4	1	0.95625	19.884174
b1938	0	Experiment 14	Stack_col_14_15.tif	240.5	0	1	4	1	0.9475983	13.812636
b1939	0	Experiment 14	Stack_col_14_15.tif	246.86842	0	1	4	1	0.8627306	34.618847
b1940	0	Experiment 14	Stack_col_14_15.tif	242.43182	0	1	4	1	0.8635098	19.94285
b1941	0	Experiment 14	Stack_col_14_15.tif	241.16129	0	1	4	1	0.9284535	14.979035
b1942	0	Experiment 14	Stack_col_14_15.tif	242.10606	1	1	4	1	0.83548665	29.589401
b1943	0	Experiment 14	Stack_col_14_15.tif	243.98215	0	1	4	1	0.87711865	26.598845
b1944	0	Experiment 14	Stack_col_14_15.tif	241.54839	0	1	4	1	0.8426966	26.895248
b1945	0	Experiment 14	Stack_col_14_15.tif	241.9452	1	1	4	1	0.70414996	35.052803
b1946	0	Experiment 14	Stack_col_14_15.tif	237.71213	1	1	4	1	0.7615262	30.383018
b1947	0	Experiment 14	Stack_col_14_15.tif	240.51352	0	1	4	1	0.94244605	18.547607
b1948	0	Experiment 14	Stack_col_14_15.tif	239.10667	0	1	4	1	0.8789308	36.223106
b1949	0	Experiment 14	Stack_col_14_15.tif	246.06061	0	1	4	1	0.7348703	32.496735
b1950	0	Experiment 14	Stack_col_14_15.tif	226.8125	1	1	4	1	0.8705584	30.193333
b1952	0	Experiment 14	Stack_col_14_15.tif	235.93651	0	1	4	1	0.9363817	28.810455
b1953	0	Experiment 14	Stack_col_14_15.tif	243.07317	0	1	4	1	0.9372057	18.035917
b1959	0	Experiment 14	Stack_col_14_15.tif	235.13954	0	1	5	1	0.94588697	20.046453
b1960	0	Experiment 14	Stack_col_14_15.tif	235.33803	0	1	5	1	0.6251299	33.795887
b1961	0	Experiment 14	Stack_col_14_15.tif	238.54167	1	1	5	1	0.5780016	32.546665
b1962	0	Experiment 14	Stack_col_14_15.tif	241.29091	0	1	5	1	0.7687815	25.092209
b1963	0	Experiment 14	Stack_col_14_15.tif	241.09459	0	1	5	1	0.8129352	33.55046
b1964	0	Experiment 14	Stack_col_14_15.tif	241.78947	0	1	5	1	0.8998743	14.930648
b1965	0	Experiment 14	Stack_col_14_15.tif	236.96078	1	1	5	1	0.76352936	24.030973
b1966	0	Experiment 14	Stack_col_14_15.tif	235.84763	1	1	5	1	0.32168898	50.55014
b1967	0	Experiment 14	Stack_col_14_15.tif	241.62222	1	1	5	1	0.88819796	20.585125
b1968	0	Experiment 14	Stack_col_14_15.tif	235.64815	1	1	5	1	0.44518954	49.482986
b1969	0	Experiment 14	Stack_col_14_15.tif	234.23256	0	1	5	1	0.95161676	18.41593
b1970	0	Experiment 14	Stack_col_14_15.tif	237.67346	0	1	5	1	0.87255013	23.537891
b1971	0	Experiment 14	Stack_col_14_15.tif	242.42465	1	1	5	1	0.58427614	40.637318
b1972	0	Experiment 14	Stack_col_14_15.tif	238.96153	0	1	5	1	0.951512	11.829859
b1973	0	Experiment 14	Stack_col_14_15.tif	244.53969	1	1	5	1	0.77020174	27.84089
b1974	0	Experiment 14	Stack_col_14_15.tif	239.2381	0	1	5	1	0.89421254	20.127573
b1975	0	Experiment 14	Stack_col_14_15.tif	239.22	0	1	5	1	0.93696564	22.470953
b1976	0	Experiment 14	Stack_col_14_15.tif	239.11111	0	1	5	1	0.9696439	15.786102
b1977	0	Experiment 14	Stack_col_14_15.tif	238.15517	0	1	5	1	0.70407575	26.338879
b1978	0	Experiment 14	Stack_col_14_15.tif	243.41861	0	1	5	1	0.9444179	18.758902
b1979	0	Experiment 14	Stack_col_14_15.tif	241.44827	0	1	5	1	0.8714166	11.58737
b1980	0	Experiment 14	Stack_col_14_15.tif	240.7317	0	1	5	1	0.82444525	18.746914
b1981	0	Experiment 14	Stack_col_14_15.tif	237.90323	0	1	5	1	0.68093705	28.005396
b1982	0	Experiment 14	Stack_col_14_15.tif	245.63414	0	1	5	1	0.9982041	18.730484
b1983	0	Experiment 14	Stack_col_14_15.tif	240.91045	1	1	5	1	0.6107848	32.124893
b1984	0	Experiment 14	Stack_col_14_15.tif	245.59184	0	1	5	1	0.7593897	23.515099
b1985	0	Experiment 14	Stack_col_14_15.tif	234.70909	0	1	5	1	0.7596075	24.895018
b1986	0	Experiment 14	Stack_col_14_15.tif	242.38298	0	1	5	1	0.91886115	21.649433
b1987	0	Experiment 14	Stack_col_14_15.tif	235.60345	0	1	5	1	0.64211035	25.082817
b1988	0	Experiment 14	Stack_col_14_15.tif	244.08571	0	1	5	1	0.8303249	17.834324
b1989	0	Experiment 14	Stack_col_14_15.tif	236.46	0	1	5	1	0.86266154	21.972399
b1990	0	Experiment 14	Stack_col_14_15.tif	233.28572	0	1	5	1	0.80358875	17.996475
b1991	0	Experiment 14	Stack_col_14_15.tif	242.80852	1	1	5	1	0.8755531	21.993294
b1992	0	Experiment 14	Stack_col_14_15.tif	241.41818	1	1	5	1	0.9057517	24.598883
b1993	0	Experiment 14	Stack_col_14_15.tif	242.45833	0	1	5	1	0.83790153	23.119724
b1994	0	Experiment 14	Stack_col_14_15.tif	243.67392	0	1	5	1	0.92515844	18.18967
b1995	0	Experiment 14	Stack_col_14_15.tif	233.0	0	1	5	1	0.6704621	30.160938
b1996	0	Experiment 14	Stack_col_14_15.tif	239.625	1	1	5	1	0.72608453	29.515747
b1997	0	Experiment 14	Stack_col_14_15.tif	242.27272	0	1	5	1	0.7438308	19.673008
b1998	0	Experiment 14	Stack_col_14_15.tif	241.82051	0	1	5	1	0.76129466	18.337774
b1999	0	Experiment 14	Stack_col_14_15.tif	237.81657	1	1	5	1	0.37652826	73.94517
b2000	0	Experiment 14	Stack_col_14_15.tif	236.62903	1	1	5	1	0.6407767	29.837181
b2001	0	Experiment 14	Stack_col_14_15.tif	229.86046	0	1	5	1	0.85066664	16.439426
b2002	0	Experiment 14	Stack_col_14_15.tif	243.19643	0	1	5	1	0.70498496	24.415766
b2003	0	Experiment 14	Stack_col_14_15.tif	238.35538	0	1	5	1	0.52102774	59.027504
b2004	0	Experiment 14	Stack_col_14_15.tif	238.18367	0	1	5	1	0.91523224	22.344227
b2005	0	Experiment 14	Stack_col_14_15.tif	235.28	1	1	5	1	0.73293144	20.80417
b2006	0	Experiment 14	Stack_col_14_15.tif	234.57303	1	1	5	1	0.83839136	38.390167
b2007	0	Experiment 14	Stack_col_14_15.tif	243.025	0	1	5	1	0.7067739	17.827337
b2008	0	Experiment 14	Stack_col_14_15.tif	244.32759	0	1	5	1	0.8214367	25.136429
b2010	0	Experiment 14	Stack_col_14_15.tif	230.25533	0	1	5	1	0.91706073	19.57139
b2011	0	Experiment 14	Stack_col_14_15.tif	244.78181	1	1	5	1	0.69508535	24.14035
b2012	0	Experiment 14	Stack_col_14_15.tif	242.49207	0	1	5	1	0.8205835	26.39192
b2013	0	Experiment 14	Stack_col_14_15.tif	242.24138	1	1	5	1	0.37199506	57.066204
b2014	0	Experiment 14	Stack_col_14_15.tif	228.43478	0	1	5	1	0.4826389	29.74207
b2015	0	Experiment 14	Stack_col_14_15.tif	240.73685	0	1	5	1	0.8039589	17.092075
b2016	0	Experiment 14	Stack_col_14_15.tif	236.54054	0	1	5	1	0.8865401	17.06215
b2017	0	Experiment 14	Stack_col_14_15.tif	230.42857	0	1	5	1	0.96593326	12.711922
b2018	0	Experiment 14	Stack_col_14_15.tif	240.69444	1	1	5	1	0.80552423	32.541756
b2019	0	Experiment 14	Stack_col_14_15.tif	239.31746	0	1	5	1	0.665789	26.717215
b2020	0	Experiment 14	Stack_col_14_15.tif	235.04762	0	1	5	1	0.86934674	18.21476
b2021	0	Experiment 14	Stack_col_14_15.tif	232.18867	0	1	5	1	0.8827237	22.951658
b2022	0	Experiment 14	Stack_col_14_15.tif	238.69492	0	1	5	1	0.7366656	27.50863
b2023	0	Experiment 14	Stack_col_14_15.tif	243.11429	0	1	5	1	0.7796189	15.699356
b2024	0	Experiment 14	Stack_col_14_15.tif	239.38182	0	1	5	1	0.8558917	27.197672
b2025	0	Experiment 14	Stack_col_14_15.tif	234.0577	0	1	5	1	0.80695283	24.035444
b2026	0	Experiment 14	Stack_col_14_15.tif	241.5353	1	1	5	1	0.3302399	85.251915
b2027	0	Experiment 14	Stack_col_14_15.tif	237.69388	0	1	5	1	0.8236105	21.823357
b2028	0	Experiment 14	Stack_col_14_15.tif	242.48648	0	1	5	1	0.9733714	15.710913
b2029	0	Experiment 14	Stack_col_14_15.tif	242.125	0	1	5	1	0.7418055	20.977304
b2030	0	Experiment 14	Stack_col_14_15.tif	242.04762	0	1	5	1	0.7824351	17.975885
b2031	0	Experiment 14	Stack_col_14_15.tif	236.43637	1	1	5	1	0.85749316	23.717588
b2032	0	Experiment 14	Stack_col_14_15.tif	242.03847	1	1	5	1	0.90612245	23.647018
b2033	0	Experiment 14	Stack_col_14_15.tif	241.35556	0	1	5	1	0.7018222	20.466692
b2034	0	Experiment 14	Stack_col_14_15.tif	242.84616	1	1	5	1	0.9022857	24.824532
b2035	0	Experiment 14	Stack_col_14_15.tif	238.63461	1	1	5	1	0.7138823	21.77477
b2036	0	Experiment 14	Stack_col_14_15.tif	240.15	0	1	5	1	0.9234329	17.119574
b2037	0	Experiment 14	Stack_col_14_15.tif	240.91072	0	1	5	1	0.90404797	26.49397
b2038	0	Experiment 14	Stack_col_14_15.tif	235.0	0	1	5	1	0.9181159	18.408636
b2039	0	Experiment 14	Stack_col_14_15.tif	234.31915	0	1	5	1	0.9831159	17.547085
b2040	0	Experiment 14	Stack_col_14_15.tif	237.57576	0	1	5	1	0.98779136	13.127751
b2041	0	Experiment 14	Stack_col_14_15.tif	236.95653	0	1	5	1	0.8472679	21.115099
b2042	0	Experiment 14	Stack_col_14_15.tif	237.73914	0	1	5	1	0.7963545	21.246302
b2043	0	Experiment 14	Stack_col_14_15.tif	232.50943	0	1	5	1	0.8613098	22.279602
b2044	0	Experiment 14	Stack_col_14_15.tif	242.37209	0	1	5	1	0.9456099	18.59575
b2045	0	Experiment 14	Stack_col_14_15.tif	237.82759	0	1	5	1	0.82622665	25.329113
b2046	0	Experiment 14	Stack_col_14_15.tif	241.53847	0	1	5	1	0.9470486	16.697859
b2047	0	Experiment 14	Stack_col_14_15.tif	242.01219	1	1	5	1	0.81317633	37.094948
b2048	0	Experiment 14	Stack_col_14_15.tif	232.5303	0	1	5	1	0.9174246	28.434746
b2049	0	Experiment 14	Stack_col_14_15.tif	230.04918	1	1	5	1	0.75889075	26.951662
b2050	0	Experiment 14	Stack_col_14_15.tif	240.19048	0	1	5	1	0.9497207	18.957327
[truncated: 8,564 more rows]
