# Supplementary material for: Misic, a general deep learning-based method for the high-throughput cell segmentation of complex bacterial communities
Source: eLife. 2021 Sep 9;10:e65151. doi: 10.7554/eLife.65151 (PMC8478410; doi:10.7554/eLife.65151)
Supplement: Figure 5—source data 3. [file elife-65151-fig5-data3.csv]

	area	extent	perimeter	minor_axis_length	solidity	major_axis_length
0	78.0	0.7722772277227723	0.35454545454545455	52.59188309203678	26.26935649801864	4.131445046722611
1	109.0	0.7785714285714286	0.2620192307692308	73.698484809835	38.23986054123372	3.830348673858413
2	84.0	0.6086956521739131	0.2	59.11269837220809	30.030099848449954	5.125003946379241
3	233.0	0.4038128249566724	0.08947772657450077	160.82337649086284	84.23883742454608	9.12897835375766
4	108.0	0.5510204081632653	0.1258741258741259	77.66904755831214	49.10722856316831	5.065415019459776
5	37.0	0.8409090909090909	0.37373737373737376	24.727922061357855	14.83402864361721	3.456262507221467
6	99.0	0.5051020408163265	0.19642857142857142	69.04163056034261	41.871198685005396	6.935043888144541
7	102.0	0.7611940298507462	0.18681318681318682	68.91168824543142	36.296170519576016	4.0103385520978065
8	33.0	0.9166666666666666	0.55	25.071067811865476	13.099879782959409	3.2252647036277193
9	44.0	0.8148148148148148	0.6875	32.65685424949238	18.351227892893572	3.3067981737517482
10	115.0	0.6149732620320856	0.37337662337662336	84.14213562373095	49.53080857296736	4.11250389768096
11	43.0	0.86	0.671875	30.82842712474619	17.878908358451426	3.1870845192279633
12	37.0	0.7708333333333334	0.5138888888888888	33.41421356237309	21.061029364664698	2.401125046128319
13	73.0	0.584	0.24333333333333335	60.14213562373095	35.94709555043611	4.5458793626416645
14	81.0	0.6694214876033058	0.27364864864864863	67.86396103067892	42.493361211616	2.753939233844435
15	93.0	0.6549295774647887	0.3780487804878049	80.48528137423857	45.91001600991685	3.205508699395715
16	178.0	0.388646288209607	0.2282051282051282	131.25483399593904	71.39829335924449	11.818351361633365
17	118.0	0.5244444444444445	0.16809116809116809	85.39087296526012	48.47545337606938	5.823014299958876
18	195.0	0.38767395626242546	0.10306553911205074	141.4386001800126	67.58717386823425	10.8718440146512
19	74.0	0.6434782608695652	0.16228070175438597	46.66295090390226	33.34808489733725	4.1623609032844735
20	48.0	0.7619047619047619	0.5052631578947369	35.242640687119284	21.334105977828983	3.367793526609504
21	102.0	0.6710526315789473	0.2833333333333333	78.52081528017132	44.38472938593302	3.381376322479585
22	53.0	0.7910447761194029	0.2804232804232804	41.31370849898476	23.799773417010154	2.9310539431762574
23	39.0	0.8297872340425532	0.3482142857142857	32.72792206135786	17.701700407052954	2.8314879597947322
24	110.0	0.6111111111111112	0.15625	77.49747468305831	42.096424852113735	5.119992231973148
25	111.0	0.6809815950920245	0.1581196581196581	78.5685424949238	42.05049763021304	4.643384755967964
26	112.0	0.7724137931034483	0.13526570048309178	77.84062043356595	45.95197544540451	3.3085593405346763
27	101.0	0.4297872340425532	0.12469135802469136	67.2842712474619	44.856171185342355	7.250849823852949
28	103.0	0.569060773480663	0.17487266553480477	76.2193000900063	41.280548776934225	5.42689744270035
29	103.0	0.6560509554140127	0.5567567567567567	72.5208152801713	40.91366445115206	4.122574032119414
30	127.0	0.5141700404858299	0.13424947145877378	87.59797974644665	53.20737532166231	5.754915435298899
31	65.0	0.7471264367816092	0.2813852813852814	47.798989873223334	25.249200659701284	3.8214896579610658
32	39.0	0.8863636363636364	0.325	29.213203435596427	16.234901138037483	3.0840691848646338
33	253.0	0.3400537634408602	0.0739766081871345	174.10155108391484	93.59908127147092	11.243541341595295
34	151.0	0.7512437810945274	0.14165103189493433	101.29646455628165	52.71141893142839	3.969166891886295
35	41.0	0.803921568627451	0.3445378151260504	30.520815280171306	18.945985094215036	2.810329765416942
36	74.0	0.8505747126436781	0.30578512396694213	51.041630560342604	25.380813775037897	3.785112306150282
37	104.0	0.7761194029850746	0.1625	77.49747468305833	41.957426039668725	3.3448924423922635
38	103.0	0.5919540229885057	0.27837837837837837	76.62741699796952	42.08291807394762	5.167950492360478
39	62.0	0.7848101265822784	0.4492753623188406	46.86396103067892	25.683437344074587	3.343492816784235
40	100.0	0.7518796992481203	0.625	72.86396103067892	45.86709803730052	3.3410952750052476
41	157.0	0.4815950920245399	0.28136200716845877	123.79898987322332	71.44508523784961	5.48146573654864
42	252.0	0.2540322580645161	0.1507177033492823	175.2609306503489	92.6597777161818	17.526212172460628
43	150.0	0.5882352941176471	0.22865853658536586	93.97665940288702	48.43258647971801	6.071261098740573
44	233.0	0.5839598997493735	0.09380032206119163	148.34419177103413	77.74807162721378	6.377735750928516
45	131.0	0.43812709030100333	0.21405228758169934	86.2193000900063	41.93485460083036	11.017464526220648
46	160.0	0.3611738148984199	0.19900497512437812	133.0416305603426	80.00213296621284	7.597201514794934
47	152.0	0.3275862068965517	0.10896057347670252	115.32590180780453	59.249144915286905	14.031352554481776
48	146.0	0.7121951219512195	0.19863945578231293	104.73401871576772	56.59035833115687	3.545287308140042
49	50.0	0.7575757575757576	0.37593984962406013	38.72792206135785	21.39395517786253	3.2615765892599997
50	43.0	0.7962962962962963	0.4777777777777778	35.48528137423857	18.99286343007605	3.2800044441643434
51	148.0	0.6948356807511737	0.1289198606271777	99.84671708797582	54.33878980407174	4.59762365009221
52	94.0	0.8034188034188035	0.6714285714285714	68.27817459305201	39.80911468814793	3.3254687876462397
53	54.0	0.7941176470588235	0.3	39.384776310850235	21.710454942569847	3.3738953016151143
54	55.0	0.8333333333333334	0.55	39.65685424949238	22.345729941383052	3.189329782439724
55	318.0	0.232796486090776	0.0960434913923286	203.92388155425115	100.21553912565533	24.57549450583417
56	56.0	0.7272727272727273	0.448	47.03553390593274	29.29095117316416	2.694358388636355
57	138.0	0.5307692307692308	0.36507936507936506	115.10660171779821	77.66442132007447	4.192478439862095
58	85.0	0.5345911949685535	0.27419354838709675	61.17766952966369	36.35159701281043	5.88778662117033
59	53.0	0.7162162162162162	0.22083333333333333	43.59188309203678	23.073648433504527	3.2721221809235344
60	136.0	0.7010309278350515	0.13751263902932254	96.7401153701776	54.77032535107634	3.7466765946260967
61	90.0	0.7142857142857143	0.17578125	69.14823227814082	37.11659328036632	3.3710436601491542
62	89.0	0.6742424242424242	0.43414634146341463	78.24264068711929	46.52119752048159	2.7029647897459186
63	44.0	0.8	0.5789473684210527	35.82842712474619	21.68147233721662	2.7129390487524785
64	126.0	0.7730061349693251	0.22105263157894736	74.08326112068522	37.57921970931094	4.830279341929393
65	120.0	0.4979253112033195	0.20270270270270271	83.01219330881976	44.08280866392322	7.645723733633533
66	84.0	0.7368421052631579	0.6176470588235294	61.65685424949238	38.86124056402966	3.2720752062997596
67	123.0	0.7987012987012987	0.18923076923076923	73.98275605729691	39.12083942293238	4.434138237641163
68	137.0	0.7486338797814208	0.18639455782312925	101.14823227814082	53.983510332052084	3.436152694852082
69	188.0	0.7550200803212851	0.12360289283366206	113.33809511662429	61.72383855338327	4.385228151707855
70	91.0	0.7583333333333333	0.21212121212121213	71.42031021678298	39.04789408846669	3.3089215131588157
71	99.0	0.6265822784810127	0.22297297297297297	73.59188309203678	44.13824741324978	3.632544921458043
72	46.0	0.8518518518518519	0.6388888888888888	33.82842712474619	20.092260508685804	3.0630626985648406
73	71.0	0.7717391304347826	0.6339285714285714	52.44974746830583	32.84523333585277	3.363162404135703
74	53.0	0.8548387096774194	0.6625	38.03553390593274	22.44688088968676	3.1196813851290996
75	160.0	0.5111821086261981	0.0825593395252838	122.36143571373725	72.11810925273952	4.631975044182232
76	118.0	0.5339366515837104	0.3105263157894737	79.8700576850888	42.57765526994736	7.717686921643349
77	97.0	0.49489795918367346	0.33797909407665505	77.9350288425444	48.69357751890917	5.535901997764031
78	105.0	0.580110497237569	0.18617021276595744	85.00609665440987	53.269730956556636	3.316690371120743
79	179.0	0.5774193548387097	0.1432	132.118795026618	57.198130787201876	7.065698703932391
80	103.0	0.6058823529411764	0.19507575757575757	74.76955262170047	39.32857007915839	4.881953401599597
81	174.0	0.3466135458167331	0.17846153846153845	131.5269119345812	77.73240546727399	9.341709611977432
82	176.0	0.4595300261096606	0.13580246913580246	120.9827560572969	66.5279772467757	8.593875129037247
83	36.0	0.8	0.42857142857142855	27.071067811865476	15.830430259872918	2.988033129808094
84	88.0	0.8	0.1746031746031746	63.59797974644666	34.78764567580193	3.3527892773278865
85	112.0	0.7320261437908496	0.17204301075268819	77.94722215136416	40.15607564343016	4.252675885183475
86	159.0	0.35570469798657717	0.13429054054054054	111.3259018078045	53.9948119252836	14.317428163506655
87	118.0	0.7195121951219512	0.17251461988304093	83.87615433949867	44.205249917097355	4.050512626003057
88	111.0	0.7708333333333334	0.6306818181818182	83.07106781186548	50.560442962644885	3.2536899449572427
89	88.0	0.7154471544715447	0.20229885057471264	68.56244584051392	36.194260847552655	3.5568386994672454
90	132.0	0.5217391304347826	0.3055555555555556	102.3492424049175	58.983310740584365	5.400855278045653
91	121.0	0.40468227424749165	0.2326923076923077	100.55634918610406	57.65186406011143	8.193181411866886
92	101.0	0.696551724137931	0.1558641975308642	73.35533905932738	42.3494154228109	3.670344746775872
93	144.0	0.5806451612903226	0.26181818181818184	104.00609665440989	57.033611998714214	4.887986397495049
94	48.0	0.9795918367346939	0.9230769230769231	47.207106781186546	28.04744281313482	1.9879795660527757
95	94.0	0.6962962962962963	0.2611111111111111	67.698484809835	34.916238064455904	4.284136973982603
96	104.0	0.7878787878787878	0.18055555555555555	72.76955262170047	40.36793507780525	3.5289497294739034
97	197.0	0.3803088803088803	0.0822890559732665	147.02438661763952	84.15936978532946	10.143205744061394
98	49.0	0.8166666666666667	0.5568181818181818	40.82842712474619	24.557145730254643	2.597276245493733
99	160.0	0.6504065040650406	0.12558869701726844	114.88225099390856	60.33775154919913	4.507783600298092
100	169.0	0.6842105263157895	0.3840909090909091	115.21320343559643	62.672330414486126	4.278987980439549
101	107.0	0.6149425287356322	0.4053030303030303	87.27817459305203	49.393498549639524	4.144562828030561
102	138.0	0.5267175572519084	0.16046511627906976	97.46194077712559	51.53873402051952	6.268247494160567
103	88.0	0.7213114754098361	0.43137254901960786	64.27817459305201	38.36197502502435	3.480967773797659
104	180.0	0.6716417910447762	0.125	132.5685424949238	72.66171243432044	3.6358965390928857
105	58.0	0.6987951807228916	0.2230769230769231	47.14213562373095	29.585168018752388	2.7825893652630556
106	85.0	0.7391304347826086	0.5448717948717948	71.44974746830583	43.591219981929434	2.9603850403929117
107	105.0	0.5737704918032787	0.39473684210526316	74.76345596729058	43.97391393664185	5.018507211787845
108	161.0	0.679324894514768	0.14893617021276595	110.22539674441617	57.12594515300504	4.4682379585873555
109	133.0	0.7471910112359551	0.5277777777777778	84.52081528017132	47.739771450347085	4.120655208356246
110	122.0	0.7530864197530864	0.1737891737891738	76.8111831820431	40.198674231751234	4.780137322921375
111	164.0	0.5559322033898305	0.13453650533223954	120.56854249492379	64.73884986671207	5.895808382554308
112	157.0	0.5322033898305085	0.32708333333333334	117.6274169979695	66.37230700548301	5.47148198505707
113	43.0	0.8269230769230769	0.5657894736842105	32.03553390593274	18.613815231532254	3.1635905957775377
114	111.0	0.7602739726027398	0.555	76.89949493661166	44.30294853922257	3.5401377227307576
115	229.0	0.48414376321353064	0.08959311424100157	167.05992052357226	89.68937291292322	5.147401327584007
116	48.0	0.7868852459016393	0.3333333333333333	38.10660171779821	20.30720285976741	3.2754576967754305
117	175.0	0.48342541436464087	0.1647834274952919	125.59797974644665	68.41175410924744	7.34193863779669
118	99.0	0.66	0.495	77.10660171779821	43.711177503993184	3.9515527572307425
119	143.0	0.4612903225806452	0.23404255319148937	98.18376618407356	53.61649225136427	8.22604207649197
120	140.0	0.5982905982905983	0.2959830866807611	92.8700576850888	49.22550499607789	6.522540565771304
121	209.0	0.4583333333333333	0.13859416445623343	127.36753236814714	65.38920436533891	10.691845019128191
122	265.0	0.47153024911032027	0.30045351473922904	189.83452377915606	110.0953142821392	6.203700152369402
123	115.0	0.6216216216216216	0.33430232558139533	84.34924240491749	49.18190353104786	4.072586466342996
124	150.0	0.5617977528089888	0.17647058823529413	108.39087296526012	58.63081337226021	5.756541301132023
125	159.0	0.4622093023255814	0.159	109.25483399593904	59.42186422509684	8.521797015004184
126	105.0	0.6774193548387096	0.2125506072874494	67.25483399593904	34.803367362318525	5.4472524284277535
127	101.0	0.5872093023255814	0.24047619047619048	75.49137802864844	40.791623584878685	5.4572617918125585
128	184.0	0.6112956810631229	0.09839572192513368	137.09545442950497	73.38550609055856	4.221021587578021
129	86.0	0.8431372549019608	0.6515151515151515	65.07106781186548	35.3513100261415	3.195855049140908
130	141.0	0.6844660194174758	0.16666666666666666	103.01219330881976	55.773403397835864	3.6915387486097075
131	77.0	0.6209677419354839	0.32083333333333336	58.72792206135786	35.396670917487306	3.964842838407197
132	72.0	0.7659574468085106	0.5333333333333333	50.48528137423857	29.153864474020263	3.33329089726169
133	153.0	0.5543478260869565	0.29423076923076924	122.69238815542512	74.04655633549736	4.838055544657035
134	106.0	0.7910447761194029	0.6309523809523809	83.86396103067892	46.74637453335621	3.229177818377317
135	120.0	0.7361963190184049	0.18181818181818182	80.91168824543144	41.984713663062166	4.3146310216405315
136	109.0	0.6687116564417178	0.3323170731707317	82.17766952966369	45.10529960542814	4.0312666588371115
137	73.0	0.8202247191011236	0.6293103448275862	54.82842712474619	32.318480704060505	2.9229077806203194
138	148.0	0.6883720930232559	0.14313346228239845	107.9827560572969	57.42151550215042	4.002421119928811
139	84.0	0.7567567567567568	0.4666666666666667	63.27817459305203	36.90240668933052	3.382849841813917
140	145.0	0.46178343949044587	0.2104499274310595	108.5269119345812	59.1914188683395	7.990243687393712
141	210.0	0.44025157232704404	0.21739130434782608	143.76955262170048	76.93127716699435	8.787560744631058
142	155.0	0.5827067669172933	0.13926325247079965	117.25483399593904	63.86755972611269	4.378335281170359
143	119.0	0.7300613496932515	0.1386946386946387	79.63961030678928	46.08844091484059	3.760420640447904
144	78.0	0.6964285714285714	0.31451612903225806	61.31370849898476	34.286244336118706	3.627430054184147
145	141.0	0.6558139534883721	0.5035714285714286	105.89949493661166	64.117059901344	3.4508431514796185
146	106.0	0.7361111111111112	0.3081395348837209	79.31370849898477	44.882900658011934	3.4610360744816244
147	106.0	0.6463414634146342	0.165625	78.49747468305833	41.24721688015012	4.638896445580224
148	73.0	0.6517857142857143	0.31601731601731603	61.48528137423857	37.01682192359329	3.091275313086088
149	60.0	0.8955223880597015	0.4	37.21320343559642	18.572836967137533	4.170365597205074
150	111.0	0.7985611510791367	0.15948275862068967	76.18986283848344	41.15325922668989	3.658194953569696
151	108.0	0.84375	0.16071428571428573	74.22539674441619	39.96088828628477	3.624122801676339
152	206.0	0.544973544973545	0.19342723004694837	147.35533905932738	82.82538567619326	5.021846587306467
153	162.0	0.5567010309278351	0.10909090909090909	121.22539674441617	71.13273877675385	4.294233286596441
154	137.0	0.6227272727272727	0.40058479532163743	105.5208152801713	64.25281955913974	4.2799033954438555
155	85.0	0.7456140350877193	0.23351648351648352	61.94112549695428	32.06564446948656	3.826240909426727
156	115.0	0.7467532467532467	0.15862068965517243	79.39696961967	41.42939537171434	4.169043885887242
157	115.0	0.6052631578947368	0.3885135135135135	79.55634918610404	43.15956906011278	5.595355829876747
158	255.0	0.4521276595744681	0.06895619253650621	188.2670273047588	110.25680518290483	6.4039553432640375
159	83.0	0.7830188679245284	0.5763888888888888	67.24264068711929	40.85863289365699	2.770542674268257
160	219.0	0.3395348837209302	0.21138996138996138	160.1543289325507	86.53074953082923	14.032403861469641
161	163.0	0.3880952380952381	0.15219421101774042	117.60407640085654	62.65303763893825	11.791117955049652
162	136.0	0.723404255319149	0.168944099378882	87.9827560572969	45.59442150446173	4.516686592767311
163	78.0	0.7959183673469388	0.375	55.7634559672906	29.30845258476971	3.5502606490297364
164	101.0	0.7163120567375887	0.2337962962962963	77.45584412271572	41.22213748033292	3.6406793789480547
165	125.0	0.6578947368421053	0.16891891891891891	87.87615433949868	45.821366475241554	4.182302516749514
166	113.0	0.5044642857142857	0.2189922480620155	84.00609665440987	49.54783667900267	6.018952896599577
167	110.0	0.5945945945945946	0.2619047619047619	71.35533905932738	36.309478145367585	6.229281304565058
168	90.0	0.6382978723404256	0.25862068965517243	63.87005768508881	34.21084285081029	4.943978437977615
169	66.0	0.673469387755102	0.3626373626373626	47.69238815542512	28.414273389987322	4.073369216414913
170	162.0	0.5806451612903226	0.4426229508196721	117.7634559672906	67.68327789331106	4.792282128144794
171	131.0	0.645320197044335	0.16540404040404041	88.77564927611034	46.15256732158953	5.376655274435448
172	132.0	0.5714285714285714	0.3333333333333333	94.24873734152916	50.32408606231229	5.668825403942774
173	215.0	0.6656346749226006	0.4095238095238095	146.72792206135784	86.89374996859806	3.9099382542349663
174	105.0	0.5	0.19886363636363635	81.52081528017132	50.89870866689278	4.6154335676976554
175	316.0	0.32746113989637304	0.12897959183673469	211.71067811865476	118.81182697591672	13.513731725030553
176	118.0	0.6178010471204188	0.3746031746031746	81.6923881554251	51.98100429245391	4.295720696732745
177	247.0	0.4930139720558882	0.28587962962962965	155.01219330881977	82.88318311933328	7.195857978312577
178	130.0	0.3651685393258427	0.1425438596491228	88.45584412271572	59.389852049419524	8.663985523169636
179	91.0	0.7222222222222222	0.40625	65.14213562373095	36.643825900193335	3.8180104358887186
180	102.0	0.7132867132867133	0.17894736842105263	71.01219330881976	37.62256119306446	4.122688557102545
181	121.0	0.7378048780487805	0.31025641025641026	83.62741699796952	44.96320399948654	3.7315207215806625
182	211.0	0.4137254901960784	0.20565302144249512	129.59797974644667	67.72750583768313	11.300072157034107
183	173.0	0.3793859649122807	0.19308035714285715	121.01219330881975	66.44668993286903	9.524283006105497
184	114.0	0.6993865030674846	0.31666666666666665	82.79898987322332	43.6318927636414	4.282068631279632
185	171.0	0.6895161290322581	0.31666666666666665	112.04163056034263	60.899779377244336	4.2699532249701075
186	105.0	0.6176470588235294	0.16129032258064516	76.66904755831213	41.86669726707909	5.240170592443387
187	172.0	0.5165165165165165	0.10858585858585859	122.95331880577403	64.98858059033674	6.050385270184467
188	109.0	0.45416666666666666	0.2691358024691358	85.76345596729058	53.553463583205236	6.770463815412507
189	74.0	0.6666666666666666	0.44047619047619047	55.10660171779821	31.304784604807924	3.9539275902047657
190	162.0	0.6721991701244814	0.19852941176470587	109.01219330881975	56.58250438143587	4.771679500232875
191	179.0	0.6302816901408451	0.11415816326530612	122.23149339882606	64.90651316698069	4.752671535827453
192	117.0	0.7005988023952096	0.14772727272727273	87.11879502661797	47.93409820600282	3.585518425229083
193	173.0	0.6431226765799256	0.12140350877192982	130.60407640085654	69.6731631538311	3.7590254039853
194	80.0	0.7920792079207921	0.3448275862068966	60.3492424049175	32.89756753177278	3.2105374148963843
195	129.0	0.7371428571428571	0.32908163265306123	89.89949493661166	54.13095653066905	3.1930445184305793
196	170.0	0.35714285714285715	0.18888888888888888	124.66904755831214	67.30251739213718	12.39200310346823
197	91.0	0.7711864406779662	0.38235294117647056	67.5208152801713	37.788760165084966	3.415506605064652
198	112.0	0.6627218934911243	0.12444444444444444	90.31980515339464	52.58576603611747	3.0759876772563075
199	166.0	0.5407166123778502	0.17008196721311475	121.11269837220809	70.96932674930056	4.685589380897723
200	154.0	0.5519713261648745	0.1859903381642512	105.25483399593904	56.05518827821533	5.798818020659107
201	96.0	0.6713286713286714	0.5485714285714286	67.10660171779821	37.76424322410046	4.570146525718585
202	159.0	0.5129032258064516	0.1962962962962963	114.56244584051393	61.19995685043066	6.14985290116851
203	136.0	0.49097472924187724	0.13991769547325103	103.94112549695427	65.47710899139757	5.305210358899271
204	94.0	0.7230769230769231	0.41964285714285715	64.3492424049175	34.85870427209935	4.297211707333868
205	170.0	0.748898678414097	0.10442260442260443	117.58073580374355	63.48957741676582	3.986698766267324
206	74.0	0.7254901960784313	0.3645320197044335	55.27817459305202	32.64743017530615	3.279629196613915
207	136.0	0.8143712574850299	0.16346153846153846	85.26093065034891	45.20979175340727	4.028594532117247
208	305.0	0.39869281045751637	0.0576232760249386	208.07821048680188	112.53291597421979	9.68621761005743
209	256.0	0.5714285714285714	0.06971677559912855	180.4213562373095	98.52264737784918	5.083469739999026
210	95.0	0.7364341085271318	0.2199074074074074	72.62741699796952	41.130038854138675	3.225025625268065
211	116.0	0.5523809523809524	0.15760869565217392	94.49137802864846	54.376346771756566	4.488730609315618
212	64.0	0.6597938144329897	0.4413793103448276	50.071067811865476	32.96100523325108	3.5873401028610545
213	91.0	0.6232876712328768	0.5055555555555555	64.59188309203678	33.828089242960026	6.125322352304225
214	149.0	0.6866359447004609	0.145224171539961	96.71067811865476	50.8540542206452	5.0101676905216905
215	118.0	0.6276595744680851	0.31891891891891894	80.04163056034261	42.25991236785403	5.542487610588306
216	120.0	0.8108108108108109	0.21052631578947367	73.49747468305833	38.464949987404836	4.210154420472387
217	187.0	0.5993589743589743	0.12466666666666666	123.53910524340094	64.37588699721667	6.115779243215136
218	120.0	0.5263157894736842	0.11363636363636363	89.18986283848344	49.304549247731266	5.027179585926255
219	105.0	0.6730769230769231	0.2727272727272727	75.83452377915606	40.40088591982216	4.631419819728846
220	121.0	0.6685082872928176	0.2860520094562648	92.14213562373095	52.949730148158	3.780050886242764
221	122.0	0.6256410256410256	0.17941176470588235	82.29036790187178	43.511424868266595	5.845146875722209
222	198.0	0.4230769230769231	0.13846153846153847	130.46803743153546	68.27689302368726	10.73681726653799
223	88.0	0.5789473684210527	0.3492063492063492	68.69238815542512	42.23863342481868	3.846904320368772
224	84.0	0.7433628318584071	0.2625	61.55634918610404	37.565516494876256	3.092635894675394
225	89.0	0.839622641509434	0.2542857142857143	60.526911934581186	30.80394695537995	3.8007531605238727
226	95.0	0.6737588652482269	0.2540106951871658	69.21320343559643	39.63817014063548	3.790344897160398
227	226.0	0.5406698564593302	0.1317016317016317	165.66904755831212	89.51184576355864	5.371416629062833
228	186.0	0.5454545454545454	0.1751412429378531	129.2193000900063	68.8167533813851	5.566868995479629
229	141.0	0.6077586206896551	0.1686602870813397	100.08326112068524	52.47364239135577	4.5467220451422365
230	128.0	0.7664670658682635	0.6530612244897959	95.6923881554251	52.60550872179491	3.693758324343895
231	39.0	0.7647058823529411	0.3277310924369748	33.72792206135785	19.05767056530944	2.8677510427060224
232	95.0	0.7364341085271318	0.15599343185550082	72.94722215136414	38.9390527051898	3.793759625435098
233	125.0	0.702247191011236	0.1456876456876457	87.05382386916239	45.73018479437568	4.416448196486753
234	79.0	0.79	0.21122994652406418	55.59797974644666	29.534692366471	3.8076624794254172
235	38.0	0.7916666666666666	0.35185185185185186	30.86396103067893	19.294926683256218	2.7255817686354367
236	160.0	0.4371584699453552	0.2507836990595611	119.21320343559643	66.01343343148375	7.287942548282244
237	193.0	0.5578034682080925	0.1516103692065986	137.59797974644664	77.13046597793216	5.9486174951056885
238	105.0	0.7835820895522388	0.16908212560386474	71.36143571373725	37.89050297860564	3.8231585630066793
239	83.0	0.7757009345794392	0.6287878787878788	61.242640687119284	35.84171287242852	3.151819179300742
240	167.0	0.5964285714285714	0.14844444444444443	109.05382386916237	56.224497347032994	5.725257677447505
241	113.0	0.710691823899371	0.1712121212121212	76.25483399593904	41.209927284629984	4.322918126723204
242	188.0	0.714828897338403	0.10444444444444445	126.75230867899737	68.71265031866051	4.275423507370331
243	93.0	0.6595744680851063	0.24866310160427807	70.62741699796952	37.71752578806856	4.029589950810338
244	78.0	0.7722772277227723	0.2422360248447205	55.94112549695428	28.81202229416955	3.749580014013107
245	150.0	0.78125	0.13077593722755013	98.98885271170677	52.55544323114847	4.294705797681812
246	106.0	0.7571428571428571	0.3897058823529412	72.38477631085023	37.71076385481179	3.8570161489790253
247	445.0	0.4086317722681359	0.05762755762755763	278.5401512639275	143.6573077222489	11.186595440218607
248	150.0	0.7177033492822966	0.14097744360902256	98.12489168102785	52.714717764745195	4.31466206799968
249	62.0	0.8266666666666667	0.30392156862745096	43.24873734152916	22.06815566848449	3.8154134089277894
250	119.0	0.7579617834394905	0.1335578002244669	83.88225099390857	46.78456051368413	3.7508048622801806
251	96.0	0.75	0.24615384615384617	67.52691193458118	34.075316021725236	3.8966141595549466
252	116.0	0.6744186046511628	0.21804511278195488	81.11269837220809	43.90480257224009	3.973268231398038
253	188.0	0.47117794486215536	0.24511082138200782	123.94112549695427	67.67723496168443	8.416506994420754
254	113.0	0.6075268817204301	0.28974358974358977	79.62741699796952	44.12084386675359	5.085845110290464
255	228.0	0.41155234657039713	0.23170731707317074	166.35533905932738	95.67471456400224	8.346358768964345
256	186.0	0.5585585585585585	0.40086206896551724	123.698484809835	64.79918450104172	5.932494333533944
257	103.0	0.7518248175182481	0.18006993006993008	67.87615433949868	35.61307029986065	4.407715190197522
258	85.0	0.6692913385826772	0.4336734693877551	61.55634918610404	32.3664627492915	4.749115288044819
259	121.0	0.5707547169811321	0.1423529411764706	87.9827560572969	45.232684146907665	6.288299004735088
260	104.0	0.6227544910179641	0.4444444444444444	76.14213562373095	43.544423050628836	4.712450072404554
261	55.0	0.6875	0.291005291005291	41.14213562373095	25.636170267666536	3.3530541830273934
262	232.0	0.6203208556149733	0.09872340425531916	143.1370849898476	77.25603968735763	5.928717777809892
263	156.0	0.6666666666666666	0.17647058823529413	108.18376618407355	59.55675755691734	3.9364435581436603
264	172.0	0.5676567656765676	0.20673076923076922	114.59797974644665	60.43647097667397	6.327401089688282
265	237.0	0.4030612244897959	0.11100702576112412	146.95941546018392	77.0947063408858	11.16634830747215
266	222.0	0.42610364683301344	0.22023809523809523	139.25483399593904	73.74467404027882	9.914305771919281
267	188.0	0.4895833333333333	0.10307017543859649	130.05992052357226	67.13743565627468	7.183758160184312
268	99.0	0.7615384615384615	0.3548387096774194	64.79898987322333	33.877225309201876	4.122123909227367
269	69.0	0.7040816326530612	0.2875	52.62741699796952	27.144717393767117	4.163163395636505
270	129.0	0.7456647398843931	0.15357142857142858	95.49747468305831	50.412292415655386	3.6346544134191436
271	137.0	0.7365591397849462	0.20147058823529412	93.01219330881975	48.59994820835809	4.005345979123326
272	217.0	0.36470588235294116	0.1391025641025641	147.7401153701776	80.51153367715565	9.63270433790581
273	151.0	0.6163265306122448	0.3647342995169082	98.00609665440987	53.1254995230875	5.877300924063949
274	145.0	0.6359649122807017	0.16477272727272727	93.53300858899107	48.421507865895215	5.126977610399957
275	123.0	0.6119402985074627	0.21025641025641026	83.07716446627535	44.91869193970038	5.079114001992807
276	136.0	0.7120418848167539	0.19883040935672514	87.25483399593905	45.53369431197149	4.626647349316704
277	172.0	0.5993031358885017	0.20140515222482436	126.31980515339463	70.95829764235589	4.012694300267335
278	102.0	0.7786259541984732	0.17894736842105263	73.46194077712558	38.659941173707054	3.564998958312332
279	115.0	0.5502392344497608	0.16812865497076024	82.01219330881975	44.27597101250357	6.3987340409775575
280	179.0	0.6884615384615385	0.14612244897959184	118.22539674441617	62.74047797114054	4.369952588279699
281	120.0	0.6857142857142857	0.17094017094017094	86.42640687119285	46.568256209676946	3.7554053237220577
282	160.0	0.6015037593984962	0.2777777777777778	105.45584412271572	56.64229043078883	5.404193719156255
283	216.0	0.453781512605042	0.10526315789473684	143.1309883354377	74.20737995068043	7.741317598880466
284	142.0	0.6042553191489362	0.30021141649048627	91.62741699796952	48.78556250212158	5.5991749417605226
285	209.0	0.35423728813559324	0.1685483870967742	142.63961030678928	73.46132659744957	12.30573126928997
286	132.0	0.5057471264367817	0.336734693877551	93.55634918610404	54.87878246449733	5.241867823726023
287	130.0	0.7878787878787878	0.21138211382113822	92.35533905932738	48.5496962765221	3.5706409318996646
288	137.0	0.43354430379746833	0.14315569487983282	97.25483399593904	48.475351993799286	10.47347927758035
289	112.0	0.5185185185185185	0.19047619047619047	76.42640687119285	38.27115515849492	7.958505857726622
290	206.0	0.6498422712933754	0.1689909762100082	123.9827560572969	64.82452085457244	5.297519154311521
291	100.0	0.5524861878453039	0.20833333333333334	76.97056274847714	46.3238583236408	4.311954314606634
292	227.0	0.5675	0.12625139043381536	146.95331880577402	77.47883884552648	5.776898933450906
293	453.0	0.1649672250546249	0.06371308016877637	285.55739520663053	137.1648812795964	33.69639889350952
294	97.0	0.7578125	0.21651785714285715	70.94112549695427	36.78084832802825	3.717505870887802
295	161.0	0.602996254681648	0.24283559577677225	110.5269119345812	58.8458204384895	4.946535090940922
296	145.0	0.43154761904761907	0.26851851851851855	103.46194077712559	51.203665850214875	10.801002482600717
297	219.0	0.49772727272727274	0.12207357859531773	157.46803743153544	83.08669783969842	5.99796222684868
298	141.0	0.5423076923076923	0.18030690537084398	102.84062043356596	53.64087971952674	5.169217386494111
299	102.0	0.7183098591549296	0.19318181818181818	66.91168824543142	34.44918173061462	4.935623120949295
300	192.0	0.5026178010471204	0.156734693877551	117.8111831820431	60.45375425483527	9.893303324100305
301	114.0	0.6368715083798883	0.29457364341085274	84.14213562373095	47.24889134405725	4.071265155659955
302	293.0	0.42773722627737226	0.13251922207146088	162.0243866176395	82.99624189190156	14.759372283557225
303	193.0	0.3243697478991597	0.18486590038314177	134.7462120245875	67.0862270100318	17.682761608217284
304	91.0	0.65	0.2668621700879765	66.45584412271572	34.833382274049626	4.758640245435309
305	34.0	0.8717948717948718	0.4722222222222222	25.31370849898476	13.149956718928285	3.324297915261682
306	82.0	0.7387387387387387	0.18222222222222223	58.18376618407356	33.90905190165587	3.5083134663652813
307	121.0	0.7159763313609467	0.23865877712031558	85.11269837220809	43.52845391365958	4.206410555824824
308	110.0	0.7333333333333333	0.5945945945945946	77.31370849898475	41.806069082055494	4.1518323513053526
309	157.0	0.5080906148867314	0.3036750483558994	103.35533905932738	53.373156352190435	8.043337865018577
310	202.0	0.28898426323319026	0.12640801001251564	138.1959594928933	63.23230060222345	20.667990188374198
311	97.0	0.7404580152671756	0.15953947368421054	74.25483399593904	38.544533460073	3.5637746737837133
312	118.0	0.6145833333333334	0.17352941176470588	90.35533905932738	49.11314408860134	4.104799552931277
313	141.0	0.6558139534883721	0.21266968325791855	104.07716446627535	54.29410500767363	4.038179537171828
314	115.0	0.572139303482587	0.2853598014888337	70.2842712474619	36.66885922082646	7.370280824748053
315	129.0	0.6084905660377359	0.14021739130434782	102.39087296526012	55.878144323113176	4.480503047984033
316	133.0	0.6129032258064516	0.19703703703703704	97.76955262170046	53.43866657479339	4.245294104611197
317	212.0	0.4380165289256198	0.12664277180406214	133.7462120245875	68.63528159611577	9.840369184279073
318	156.0	0.975	0.9285714285714286	86.24264068711929	46.532310366334436	4.2791917281429335
319	132.0	0.44	0.28205128205128205	91.46194077712559	44.13636090773057	10.979194461342834
320	328.0	0.47126436781609193	0.12490479817212491	219.12489168102783	120.45282170495715	6.747580989003408
321	107.0	0.5631578947368421	0.2494172494172494	72.94112549695429	38.35529272399085	6.077224758716251
322	70.0	0.7777777777777778	0.26515151515151514	47.45584412271572	26.60363322224104	3.6876193012791822
323	173.0	0.4650537634408602	0.11833105335157319	121.29646455628165	61.24675825815096	8.792959826556764
324	138.0	0.575	0.34074074074074073	96.38477631085023	52.65567405153843	5.561217864586345
325	183.0	0.6752767527675276	0.5228571428571429	107.21320343559641	56.285353692888854	5.6602357981323035
326	138.0	0.43670886075949367	0.16566626650660263	101.94112549695429	56.53931450688893	7.904962983517914
327	157.0	0.40359897172236503	0.1964956195244055	106.39087296526012	56.397575264567564	11.014671922629768
328	115.0	0.6052631578947368	0.391156462585034	83.55634918610406	46.49854933992537	5.621319969991143
329	125.0	0.5387931034482759	0.32299741602067183	87.21320343559643	47.670757636389936	6.166011544959262
330	218.0	0.3002754820936639	0.08032424465733234	155.675144212722	86.91175082800257	12.349058212915743
331	163.0	0.7342342342342343	0.4075	104.97056274847714	56.74304862707112	4.242259581114849
332	223.0	0.5645569620253165	0.13833746898263027	141.2609306503489	71.30079737689947	6.527677906065841
333	106.0	0.6503067484662577	0.4649122807017544	72.89949493661166	43.02439459166885	4.3123106616016535
334	64.0	0.6666666666666666	0.39751552795031053	47.55634918610404	26.605445080243438	4.505844630271911
335	188.0	0.618421052631579	0.12207792207792208	130.95331880577405	68.34635203316658	5.296357373003568
336	111.0	0.6453488372093024	0.2032967032967033	84.83452377915607	48.33416650672135	3.747819829377609
337	103.0	0.5421052631578948	0.3020527859237537	69.04163056034261	36.18646820697207	7.183296637644393
338	197.0	0.6588628762541806	0.1152046783625731	121.58073580374358	65.53274571499328	5.386147067967615
339	34.0	0.8292682926829268	0.5666666666666667	26.071067811865476	13.13380052598988	3.7978545217558644
340	106.0	0.6162790697674418	0.29444444444444445	82.59188309203678	43.58585472845603	4.688047437029838
341	83.0	0.5971223021582733	0.3458333333333333	60.970562748477136	35.54617905355312	4.7613385718853936
342	241.0	0.5793269230769231	0.16689750692520774	162.4619407771256	87.69069591379446	5.351103044864631
343	168.0	0.5894736842105263	0.2	119.14823227814082	65.20572018233247	5.494410368663652
344	258.0	0.24524714828897337	0.09821088694328131	173.95331880577402	93.00442455065439	21.230546743247086
345	114.0	0.7215189873417721	0.24358974358974358	81.11269837220809	43.033456076754995	3.872676067580262
346	181.0	0.5973597359735974	0.1587719298245614	130.8050865276332	71.84143436433109	4.504246760620636
347	166.0	0.4129353233830846	0.10682110682110682	116.67514421272202	61.10683643191353	9.736168618767561
348	118.0	0.6210526315789474	0.2126126126126126	84.76955262170046	44.79765228371766	4.4937310825916015
349	104.0	0.8062015503875969	0.1597542242703533	75.15432893255071	40.47983362536852	3.4388046403935784
350	128.0	0.5161290322580645	0.21333333333333335	90.18376618407358	46.974983297488784	7.906087378605809
351	111.0	0.5388349514563107	0.3523809523809524	76.87005768508881	40.229161491452686	6.634944395363771
352	79.0	0.6869565217391305	0.23939393939393938	63.420310216782966	34.66185756416902	3.717161146228478
353	259.0	0.4245901639344262	0.08702956989247312	169.13708498984758	87.55835977383727	10.705283137905388
354	100.0	0.6329113924050633	0.4329004329004329	69.34924240491749	36.83680447170595	5.517267105488398
355	125.0	0.625	0.28935185185185186	79.698484809835	41.333607770614286	5.766313611399769
356	79.0	0.7452830188679245	0.4540229885057471	56.86396103067893	33.25467548649662	3.398913327059797
357	111.0	0.7872340425531915	0.1627565982404692	79.1543289325507	41.981889819117015	3.569379649702614
358	135.0	0.7180851063829787	0.17374517374517376	89.74011537017762	46.27207211952858	4.276118669250571
359	184.0	0.5348837209302325	0.2358974358974359	127.2842712474619	68.85940848770446	6.4798298918002795
360	55.0	0.6790123456790124	0.5092592592592593	46.82842712474619	28.984612948512844	2.953409123037634
361	209.0	0.48267898383371827	0.3530405405405405	149.90559159102156	82.37679120877831	6.929322299145809
362	65.0	0.65	0.24904214559386972	57.14213562373095	31.80333853923414	3.1913290077626706
363	207.0	0.7446043165467626	0.12205188679245282	130.8528137423857	69.60155481189561	4.1802216125662355
364	174.0	0.5576923076923077	0.3515151515151515	116.79898987322333	64.69426395683769	6.00192184933256
365	185.0	0.5	0.12091503267973856	122.95331880577405	63.57534491658539	7.802524602729955
366	136.0	0.7727272727272727	0.16346153846153846	83.67514421272202	44.515070112193804	4.627963750658036
367	222.0	0.2948207171314741	0.08951612903225807	158.71677477306463	83.21685762153757	13.92626040447095
368	138.0	0.75	0.46	99.31370849898475	55.55462359857166	3.4164974266074077
369	180.0	0.6081081081081081	0.13043478260869565	114.61017305526642	61.41018087339776	5.772694871914278
370	78.0	0.5342465753424658	0.17727272727272728	58.491378028648455	30.622962483069013	6.0970763240030434
371	120.0	0.7228915662650602	0.15483870967741936	81.84671708797583	43.354689300894044	4.208565876169045
372	121.0	0.4245614035087719	0.15031055900621118	90.42640687119285	46.43081135586077	8.838740856313015
373	234.0	0.5330296127562643	0.291044776119403	144.5269119345812	76.20208640336271	7.640538609520964
374	173.0	0.7032520325203252	0.36886993603411516	126.48528137423857	75.4950636097069	3.322276376330865
375	142.0	0.39775910364145656	0.16099773242630386	105.2193000900063	57.83736925231318	8.628803751083483
376	179.0	0.4040632054176072	0.11445012787723785	122.63961030678927	63.48259251820524	9.839710792635218
377	175.0	0.5756578947368421	0.1715686274509804	117.49747468305833	61.41818052832755	5.4272613624082995
378	165.0	0.6	0.23947750362844702	113.14823227814081	60.33181253133679	4.919819924406944
379	139.0	0.7988505747126436	0.5914893617021276	96.07106781186548	53.91840159618618	3.5606215221747006
380	224.0	0.5743589743589743	0.10879067508499271	158.71067811865476	85.4006925783832	4.410037309508917
381	142.0	0.5220588235294118	0.1375968992248062	99.5685424949238	53.97830183634964	6.11362870627264
382	192.0	0.26778242677824265	0.14814814814814814	129.08326112068522	62.55317601126806	21.835537756092968
383	175.0	0.6013745704467354	0.1695736434108527	105.39696961967	54.220494132069476	5.646057659520277
384	164.0	0.37528604118993136	0.18552036199095023	113.2193000900063	60.359927562339955	12.270587046980227
385	154.0	0.5703703703703704	0.14879227053140096	107.60407640085654	54.86947583658504	6.096438444853137
386	70.0	0.9333333333333333	0.29411764705882354	43.73401871576773	22.35646730163861	4.023883086880881
387	123.0	0.7365269461077845	0.20098039215686275	80.66904755831213	41.332910927982844	4.682025407722289
388	128.0	0.7272727272727273	0.19393939393939394	78.29036790187178	40.70862152482242	4.626216980294495
389	120.0	0.6417112299465241	0.25210084033613445	76.11269837220809	40.04014553144885	5.187385472723138
390	237.0	0.6457765667574932	0.09404761904761905	170.3380951166243	89.5148016977849	4.179003706880766
391	196.0	0.49122807017543857	0.17737556561085974	141.39087296526012	75.61968735679125	6.0492420772186515
392	170.0	0.7172995780590717	0.16666666666666666	93.53910524340095	49.04728206914608	5.484583978936743
393	164.0	0.47953216374269003	0.17634408602150536	127.31980515339464	71.7663667480863	6.455192328881401
394	130.0	0.5098039215686274	0.35135135135135137	84.2842712474619	43.957300268696386	8.290809866086288
395	231.0	0.3719806763285024	0.10774253731343283	149.16042558696057	82.1073336240291	12.495581433999229
396	91.0	0.7982456140350878	0.5352941176470588	66.07106781186548	36.775307765288275	3.31931756037298
397	120.0	0.5529953917050692	0.18575851393188855	82.2193000900063	43.66528402522888	6.054536765148598
398	133.0	0.5495867768595041	0.3584905660377358	95.9350288425444	58.47779729536173	5.060334913701812
399	154.0	0.506578947368421	0.13580246913580246	118.04772721475248	64.08879203651155	4.8358431792421195
400	151.0	0.4339080459770115	0.17062146892655367	120.73401871576773	65.86537223219112	5.738295918117393
401	172.0	0.6539923954372624	0.17426545086119555	109.74011537017762	56.53152244954959	5.070658481127605
402	91.0	0.6791044776119403	0.30333333333333334	64.83452377915607	33.866376621739015	4.0983639030888614
403	156.0	0.45481049562682213	0.14156079854809436	101.98275605729691	52.67347310076595	8.776292595012617
404	210.0	0.45161290322580644	0.2545454545454545	150.14823227814082	86.09555677176107	6.990729354239723
405	144.0	0.7272727272727273	0.12777284826974267	110.1543289325507	57.559464926052726	3.5105401989202303
406	72.0	0.7422680412371134	0.5625	61.44974746830583	35.38619708430371	2.7865008119527275
407	152.0	0.628099173553719	0.11692307692307692	119.8111831820431	63.54105817300052	4.359056982755567
408	50.0	0.8333333333333334	0.25	42.76345596729059	23.400606475520664	2.735619962242599
409	264.0	0.4536082474226804	0.06376811594202898	207.16652224137047	115.75169100493396	5.7185580743417255
410	169.0	0.5577557755775577	0.26040061633281975	121.24873734152915	66.98332025129837	5.253995911656327
411	193.0	0.5119363395225465	0.11825980392156862	128.61017305526642	67.34608219416758	6.694225690218228
412	216.0	0.4161849710982659	0.2033898305084746	134.98275605729688	68.35352682971877	10.755055893752251
413	92.0	0.8070175438596491	0.5411764705882353	61.86396103067892	35.60659736704226	3.590853868201227
414	63.0	0.6428571428571429	0.5080645161290323	56.828427124746185	35.23755627712366	3.2932876835628964
415	97.0	0.6339869281045751	0.30793650793650795	72.97056274847714	41.06005432199022	3.8403532077117353
416	52.0	0.8	0.49523809523809526	37.656854249492376	22.68917428559332	2.9881735038076935
417	235.0	0.3440702781844802	0.13623188405797101	169.05382386916236	89.54285387258044	12.080199795485196
418	202.0	0.5534246575342465	0.2084623323013416	125.84062043356595	67.69524485378771	6.254278884423311
419	157.0	0.4077922077922078	0.1465919701213819	128.73401871576772	72.7755683615351	8.234640891709228
420	126.0	0.7	0.5361702127659574	87.65685424949238	53.29271656583463	3.868621203768332
421	128.0	0.7111111111111111	0.42524916943521596	89.14213562373094	49.38822351130704	3.7481322795064904
422	75.0	0.8620689655172413	0.30991735537190085	50.8700576850888	25.615580771992526	3.792844072456874
423	128.0	0.8533333333333334	0.6918918918918919	77.07106781186548	40.9423566167204	4.225087496939093
424	96.0	0.6486486486486487	0.48	73.07106781186548	44.195803933852126	3.4781078311268208
425	158.0	0.512987012987013	0.3442265795206972	110.45584412271572	59.40189045382563	6.859306411158474
426	112.0	0.6666666666666666	0.17337461300309598	82.76955262170047	45.00679938946177	4.217038875799987
427	139.0	0.46179401993355484	0.24777183600713013	103.45584412271572	57.74634734054321	7.572065875288376
428	146.0	0.48344370860927155	0.23174603174603176	98.73401871576775	52.25453684790827	7.973477635016622
429	77.0	0.8105263157894737	0.32083333333333336	53.04163056034261	27.411989822553014	3.819142559968621
430	121.0	0.40468227424749165	0.2400793650793651	100.76345596729058	69.35143337607239	5.444608912146038
431	146.0	0.49158249158249157	0.365	106.87005768508881	56.05229576918453	6.872628825663137
432	117.0	0.6763005780346821	0.16666666666666666	87.18376618407356	47.85642999936701	3.7395432655869394
433	70.0	0.8235294117647058	0.30434782608695654	50.83452377915606	26.473906834824646	3.5193940461456124
434	243.0	0.31640625	0.10887096774193548	165.46803743153546	88.18630857172995	14.58582249784002
435	470.0	0.18445839874411302	0.05328798185941043	316.91273426595797	147.02010221204944	26.415618160762723
436	100.0	0.45248868778280543	0.3105590062111801	80.38477631085023	54.20967802402843	5.5617630775833815
437	144.0	0.4982698961937716	0.23076923076923078	100.31980515339464	55.003080900146855	7.034514479410526
438	120.0	0.8163265306122449	0.20168067226890757	82.42640687119285	42.673750718253665	3.7397117643996642
439	113.0	0.738562091503268	0.5380952380952381	74.14213562373095	39.0613107623099	4.4499688767602015
440	114.0	0.7916666666666666	0.3048128342245989	76.04163056034261	39.939370208988585	3.8112981047785395
441	121.0	0.6335078534031413	0.1867283950617284	96.10660171779821	66.17253593778432	2.8302995990311235
442	209.0	0.37122557726465366	0.12179487179487179	129.53910524340097	66.09950254812823	11.918961442855526
443	141.0	0.8103448275862069	0.15736607142857142	86.71067811865476	46.697073930340316	4.1435384407413505
444	176.0	0.555205047318612	0.16326530612244897	113.9827560572969	58.2927784388125	7.770302549980144
445	129.0	0.7206703910614525	0.26875	95.76345596729058	53.10468367309869	3.3683066180298935
446	196.0	0.38811881188118813	0.2512820512820513	142.84062043356596	75.29118281869151	11.123645942323563
447	109.0	0.7171052631578947	0.2202020202020202	76.76955262170047	40.20854658414597	4.033525840079721
448	125.0	0.5656108597285068	0.13020833333333334	87.56854249492379	47.55469656908099	5.338876494416843
449	129.0	0.8164556962025317	0.18092566619915848	79.9827560572969	42.188928359987024	4.101336716240137
450	53.0	0.7681159420289855	0.22083333333333333	41.38477631085024	24.024986729452404	2.926246332422465
451	56.0	0.6666666666666666	0.25	43.071067811865476	31.076661865591504	2.7079372271868865
452	147.0	0.5787401574803149	0.16387959866220736	94.81118318204308	49.20629442086773	6.317722621562455
453	164.0	0.43157894736842106	0.13387755102040816	110.39696961966999	61.316717003166005	9.40554417164872
454	83.0	0.7904761904761904	0.34156378600823045	59.798989873223334	31.166316347837203	3.585015358304685
455	132.0	0.6082949308755761	0.13721413721413722	95.05382386916236	50.597091858936764	4.770918147794252
456	158.0	0.7488151658767772	0.17913832199546487	100.32590180780451	51.81607001618303	4.481069807525638
457	83.0	0.5724137931034483	0.3705357142857143	60.935028842544405	35.045515986371164	5.270496406679684
458	87.0	0.6641221374045801	0.29292929292929293	65.89949493661166	38.76062544663404	3.6889160739144273
459	168.0	0.6774193548387096	0.3010752688172043	119.55634918610406	68.75073615933957	3.598563079019987
460	161.0	0.5709219858156028	0.11250873515024458	120.81118318204308	64.57049837547623	4.6453391636713635
461	61.0	0.6853932584269663	0.20333333333333334	45.9350288425444	31.018962199000363	3.100703634238763
462	130.0	0.680628272251309	0.17379679144385027	98.14823227814084	53.2021955156526	3.5561100856825996
463	84.0	0.6461538461538462	0.4827586206896552	60.14213562373095	32.82217578353074	5.043081200166327
464	70.0	0.5691056910569106	0.3684210526315789	57.65685424949238	39.87389311306936	3.1354450010260257
465	200.0	0.5730659025787965	0.0992063492063492	146.40306627407986	78.41880866266824	5.473723406222416
466	114.0	0.5112107623318386	0.2235294117647059	77.76955262170048	39.78151748714687	7.953250698632018
467	68.0	0.544	0.125	59.935028842544405	40.10637849952496	3.5280677125488733
468	118.0	0.5756097560975609	0.3010204081632653	91.5208152801713	59.84355762707428	3.2670964715394475
469	122.0	0.7176470588235294	0.37888198757763975	88.69238815542512	51.905772036065066	3.420053889003021
470	109.0	0.36212624584717606	0.13625	92.10660171779821	58.86199887981269	7.345115410627931
471	127.0	0.7341040462427746	0.167989417989418	95.0477272147525	49.85941850018611	3.6223651099224456
472	157.0	0.572992700729927	0.3115079365079365	111.72792206135786	64.25105356997778	4.86358322785171
473	76.0	0.7378640776699029	0.33043478260869563	52.79898987322333	25.156672100472186	4.794447223151452
474	44.0	0.7857142857142857	0.2875816993464052	32.520815280171306	20.847185580557024	2.8397666906664476
475	101.0	0.33114754098360655	0.18703703703703703	90.89949493661166	63.74388815783015	7.014369600246836
476	193.0	0.652027027027027	0.11286549707602339	134.16042558696057	69.76769347526405	4.400302536090331
477	124.0	0.6231155778894473	0.15656565656565657	84.5685424949238	44.42944172183597	4.953975968953177
478	129.0	0.5657894736842105	0.215	93.79898987322332	58.01754982665562	4.232540118711234
479	49.0	0.5632183908045977	0.3602941176470588	47.207106781186546	38.72390667907496	2.464084597042396
480	128.0	0.3256997455470738	0.21548821548821548	110.04163056034261	63.98306625678095	9.631858653986695
481	179.0	0.667910447761194	0.14028213166144202	110.95331880577405	58.889818042145286	5.3073394683817146
482	137.0	0.5393700787401575	0.16913580246913582	103.97056274847714	62.49662980331643	4.517419352017888
483	106.0	0.6973684210526315	0.17320261437908496	80.01219330881975	42.33464054345824	3.6346593136122607
484	160.0	0.5693950177935944	0.1568627450980392	120.01219330881975	70.86589312153129	4.308589338484865
485	137.0	0.6682926829268293	0.2509157509157509	90.90559159102155	47.406086932974375	5.034710237871403
486	190.0	0.4567307692307692	0.1884920634920635	136.0416305603426	82.37442293592736	4.890098253758849
487	163.0	0.34754797441364604	0.1257716049382716	118.5685424949238	63.53538430068879	10.49499529929721
488	210.0	0.5526315789473685	0.1271186440677966	137.53910524340094	71.73252770626935	6.92942242709688
489	151.0	0.6565217391304348	0.15729166666666666	110.32590180780451	58.306182221843734	4.033108257887738
490	196.0	0.47572815533980584	0.11079706048615037	136.12489168102783	78.51286651933339	6.35353774649174
491	147.0	0.7277227722772277	0.14714714714714713	95.29646455628166	49.49275997180771	5.077889069261933
492	191.0	0.7579365079365079	0.11646341463414635	113.78784258493012	62.49384708431813	4.624025062916093
493	183.0	0.6802973977695167	0.11296296296296296	130.61017305526642	69.28877168494199	4.111691393612698
494	52.0	0.7323943661971831	0.43333333333333335	43.071067811865476	27.423413657358548	2.7656267046925307
495	104.0	0.7123287671232876	0.24761904761904763	79.14213562373095	45.756239804639435	3.179717248524939
496	137.0	0.6227272727272727	0.22096774193548388	103.31370849898477	66.62927140726023	3.3051015798122423
497	184.0	0.2636103151862464	0.09469891919711786	138.01828996322962	80.1538388203474	15.006697479548128
498	191.0	0.6701754385964912	0.11369047619047619	135.78174593052023	72.08250771140165	4.111374230502945
499	141.0	0.5529411764705883	0.1865079365079365	115.9350288425444	72.08899719939801	3.505581674233261
500	175.0	0.5520504731861199	0.18382352941176472	122.59797974644665	65.12861526103546	5.79315541740628
501	109.0	0.6987179487179487	0.2540792540792541	75.11269837220809	38.75904883478092	4.675290938336308
502	117.0	0.6324324324324324	0.26	86.14213562373095	50.02571074366057	4.307077642302353
503	49.0	0.4666666666666667	0.32666666666666666	45.65685424949238	35.541997124160496	3.879066484909329
504	150.0	0.35799522673031026	0.14354066985645933	108.46194077712559	60.65749905146656	10.770300106166387
505	80.0	0.6722689075630253	0.26143790849673204	64.5208152801713	38.409386110281645	3.3210026545161737
506	40.0	0.7843137254901961	0.4444444444444444	31.86396103067893	20.307908969276266	2.6284659586132433
507	83.0	0.4853801169590643	0.1596153846153846	65.49137802864844	35.95389107004708	7.001314103098749
508	146.0	0.5509433962264151	0.15082644628099173	105.49747468305833	55.51117486919748	5.958840136232054
509	199.0	0.6199376947040498	0.13519021739130435	118.02438661763951	61.29030576864734	6.211341657895422
510	35.0	0.7608695652173914	0.4375	30.82842712474619	18.31501216081078	2.665333566130326
511	67.0	0.7127659574468085	0.23103448275862068	52.52081528017131	33.23789904742834	2.968522706665333
512	221.0	0.3720538720538721	0.16934865900383142	170.76955262170048	105.11517776169744	9.28428469189854
513	142.0	0.6761904761904762	0.12347826086956522	107.84671708797582	57.97865682097892	3.879208094069984
514	117.0	0.7177914110429447	0.15476190476190477	87.15432893255071	45.06117920917821	4.021695546009872
515	162.0	0.5175718849840255	0.3306122448979592	107.80508652763321	54.34181123724176	9.898787489718584
516	169.0	0.37472283813747226	0.17604166666666668	127.698484809835	73.40101478977503	9.447634661825514
517	183.0	0.6512455516014235	0.12331536388140162	127.53910524340093	67.27674484675785	4.471396276673991
518	114.0	0.7169811320754716	0.14671814671814673	87.49747468305833	46.93558561720665	3.63213226563994
519	112.0	0.6588235294117647	0.4666666666666667	89.07106781186548	53.71942452345943	3.090919929600718
520	149.0	0.6234309623430963	0.41388888888888886	110.48528137423857	68.93389455719958	3.6615504848329006
521	148.0	0.5103448275862069	0.3915343915343915	93.94112549695427	48.60450616557458	8.062715783532735
522	170.0	0.7264957264957265	0.14492753623188406	118.8111831820431	62.366064030096716	3.85435653699718
523	112.0	0.7619047619047619	0.18421052631578946	86.76955262170047	46.36720379824373	3.2573721243698435
524	178.0	0.5579937304075235	0.17348927875243664	123.2193000900063	67.15765500108832	5.620638666729534
525	164.0	0.6165413533834586	0.21298701298701297	118.31980515339464	63.383511833182034	4.264852198873691
526	135.0	0.6585365853658537	0.3813559322033898	114.86396103067892	66.34536041123526	3.6815686213520022
527	145.0	0.5253623188405797	0.30655391120507397	93.69848480983501	50.20007248952447	8.135376516152553
528	148.0	0.6040816326530613	0.3162393162393162	104.72792206135784	62.0996694842218	4.040509570713177
529	218.0	0.6355685131195336	0.11534391534391535	148.36753236814712	78.03007953178164	4.481449604940365
530	189.0	0.4621026894865526	0.2684659090909091	134.94112549695427	73.72999040390143	8.71950872887489
531	116.0	0.655367231638418	0.3853820598006645	85.31370849898477	48.848514500726374	4.206872912854028
532	120.0	0.6666666666666666	0.3157894736842105	82.62741699796952	43.59329574115441	4.874891426919073
533	104.0	0.7428571428571429	0.14035087719298245	86.698484809835	48.81287270973597	2.8407270218137066
534	171.0	0.6812749003984063	0.24818577648766327	113.90559159102153	59.791439671286405	4.231937118710352
535	97.0	0.7028985507246377	0.20726495726495728	74.24873734152916	41.859375613402506	3.262837944727613
536	197.0	0.4624413145539906	0.32189542483660133	141.8700576850888	79.13176958283607	7.226803423349153
537	156.0	0.4469914040114613	0.3270440251572327	110.94112549695427	60.882631628624395	7.25623617827228
538	49.0	0.7777777777777778	0.3684210526315789	35.10660171779821	21.456001548085045	3.0601109649695197
539	126.0	0.7974683544303798	0.19504643962848298	82.66904755831214	42.81008819273674	4.123173115341058
540	103.0	0.64375	0.1961904761904762	70.698484809835	38.38683047247376	4.446742607672789
541	129.0	0.7206703910614525	0.13679745493107104	97.74011537017762	53.06967603139822	3.611283847262095
542	199.0	0.6633333333333333	0.11384439359267734	115.68124086713189	65.78184284775948	5.473677114052139
543	149.0	0.58203125	0.14150047483380818	100.05382386916236	51.693854240417416	6.159759093899541
544	136.0	0.5132075471698113	0.1516164994425864	94.15432893255071	48.79097413202008	6.295534117367698
545	123.0	0.6795580110497238	0.5	85.14213562373095	46.26471857755513	4.606324300223889
546	107.0	0.7328767123287672	0.1564327485380117	82.04772721475248	43.423712338651065	3.482439581047529
547	128.0	0.5898617511520737	0.17414965986394557	84.46194077712558	44.53726586232394	6.492808243254549
548	144.0	0.7024390243902439	0.1925133689839572	85.15432893255071	44.52937775520876	5.2172208384473056
549	144.0	0.7346938775510204	0.16744186046511628	99.11879502661797	51.949429993565744	3.8179758240452055
550	131.0	0.6421568627450981	0.14177489177489178	97.7401153701776	53.89715350526019	3.9454125948298295
551	49.0	0.8596491228070176	0.4803921568627451	35.72792206135786	17.74815224926024	3.562754671591672
552	90.0	0.7964601769911505	0.20833333333333334	65.94112549695427	33.83748858245477	3.657992569992427
553	152.0	0.6551724137931034	0.1111111111111111	102.61017305526642	57.26218500775603	5.017689676411454
554	101.0	0.7372262773722628	0.18984962406015038	67.87615433949868	35.37123652594949	4.359317984431648
555	70.0	0.6140350877192983	0.4	49.55634918610405	28.58066191361293	5.2519820639605985
556	41.0	0.82	0.5857142857142857	30.485281374238568	15.747107810631903	3.762749036517989
557	142.0	0.5867768595041323	0.1574279379157428	97.98275605729691	51.51903860340586	5.856930814670976
558	263.0	0.3299874529485571	0.10473914774990044	185.16042558696057	96.2787193788233	15.667756303306934
559	81.0	0.7232142857142857	0.2109375	58.76955262170047	31.238520897909744	3.9041972314222617
560	145.0	0.5141843971631206	0.12184873949579832	102.95331880577403	55.05236115271549	6.324326323740036
561	168.0	0.6511627906976745	0.08484848484848485	124.8111831820431	75.02782109130506	3.4632156653369557
562	156.0	0.5909090909090909	0.17647058823529413	112.42640687119285	58.47148683137656	4.449780511140121
563	410.0	0.45104510451045104	0.053791655733403304	267.9898987322333	142.29142954199907	9.580073063067749
564	146.0	0.6576576576576577	0.16898148148148148	91.39696961966999	47.57575151765227	5.572692751098334
565	72.0	0.8089887640449438	0.21301775147928995	57.45584412271572	31.08405447333027	3.0328574258779946
566	145.0	0.4965753424657534	0.1751207729468599	99.35533905932735	54.143698255056954	7.19122937551127
567	39.0	0.8478260869565217	0.5	29.31370849898476	14.863127461122733	3.492454475170514
568	155.0	0.6595744680851063	0.4415954415954416	85.21320343559641	44.43761682199155	6.31640753165052
569	112.0	0.7044025157232704	0.16842105263157894	82.08326112068522	43.13319943719386	3.7275264251289624
570	108.0	0.782608695652174	0.225	75.35533905932738	39.404184926846455	3.699097742082837
571	103.0	0.8306451612903226	0.18165784832451498	69.46194077712559	36.79179585059989	3.7508551141578423
572	148.0	0.7254901960784313	0.148	99.63961030678928	52.63241705990519	4.10298892439649
573	329.0	0.1950207468879668	0.07931533269045322	218.37362902255705	104.18353682758864	28.632581227232222
574	119.0	0.5804878048780487	0.4219858156028369	89.72792206135786	52.985253856144844	4.248436125286873
575	261.0	0.36916548797736914	0.07842548076923077	170.6223663640862	89.68172348226126	10.17048779044321
576	222.0	0.6529411764705882	0.11616954474097331	129.37362902255703	67.73792840427863	5.581396400404887
577	56.0	0.7088607594936709	0.448	41.65685424949238	26.52184612191758	3.077211287145183
578	120.0	0.7142857142857143	0.1411764705882353	86.46803743153548	46.90115784485232	3.8648348435351005
579	119.0	0.7083333333333334	0.14875	92.29036790187178	49.02513143820407	3.5805143845643546
580	37.0	0.9024390243902439	0.7708333333333334	24.449747468305834	12.566963211863623	3.808778006770471
581	162.0	0.5242718446601942	0.23275862068965517	117.87005768508881	64.69645178141566	6.686069633112105
582	143.0	0.6941747572815534	0.19117647058823528	99.01219330881975	51.21677386974607	4.2885984680782885
583	209.0	0.76	0.12462731067382231	120.16652224137047	63.489580013892315	4.674246271783151
584	170.0	0.4913294797687861	0.11486486486486487	112.40306627407986	59.73998285792156	6.298924912685757
585	133.0	0.5611814345991561	0.125	95.88225099390856	50.77489596390911	5.705438967415481
586	123.0	0.33153638814016173	0.23076923076923078	89.91168824543142	48.381164817988676	14.122464373570892
587	187.0	0.5955414012738853	0.288135593220339	125.49137802864844	66.87849536842505	5.698524621182726
588	185.0	0.6954887218045113	0.6166666666666667	122.17766952966369	66.3681575512816	4.384779353981889
589	141.0	0.7268041237113402	0.14656964656964658	93.675144212722	50.41793422570818	4.131510786177381
590	169.0	0.6259259259259259	0.16095238095238096	115.7401153701776	59.839163697658535	4.760466828256754
591	97.0	0.6178343949044586	0.260752688172043	67.07716446627535	33.87089112169302	5.740227756342761
592	255.0	0.2961672473867596	0.12878787878787878	157.23759005323595	75.89803773568639	19.39675339897314
593	36.0	0.8181818181818182	0.6428571428571429	26.86396103067893	15.751690073367705	3.3676475403501045
594	150.0	0.43103448275862066	0.2958579881656805	94.70458146424488	45.4747300502222	12.197159695486329
595	125.0	0.8012820512820513	0.1539408866995074	75.39696961967	43.40720608879284	4.211260567225269
596	128.0	0.7032967032967034	0.2	91.76955262170046	48.306641205229376	3.831746684833857
597	111.0	0.4826086956521739	0.30578512396694213	78.76955262170047	38.500419076293454	8.506795399913788
598	124.0	0.6526315789473685	0.12916666666666668	89.49747468305833	51.755268937221956	3.748165542787572
599	123.0	0.7987012987012987	0.25625	87.4558441227157	45.96086438456041	3.5402041038270933
600	48.0	0.7619047619047619	0.38095238095238093	34.69238815542512	20.413443620810877	3.40541849051349
601	121.0	0.6335078534031413	0.12296747967479675	94.08326112068522	49.827656672095394	4.606450223156993
602	179.0	0.7188755020080321	0.12160326086956522	118.8528137423857	60.87428802314421	4.158965587245996
603	109.0	0.6855345911949685	0.15482954545454544	73.91168824543142	41.61226873527806	4.16912891900691
604	166.0	0.7155172413793104	0.141156462585034	106.71067811865476	56.90597625822961	4.242799225452531
605	135.0	0.5294117647058824	0.2872340425531915	96.8700576850888	49.56616833722176	6.60119322369979
606	150.0	0.5319148936170213	0.15479876160990713	115.73401871576775	66.28824378454442	4.790947756472867
607	152.0	0.8085106382978723	0.14393939393939395	105.8111831820431	54.83594693343042	3.703925271675688
608	114.0	0.76	0.2235294117647059	77.56244584051393	40.31999924477671	3.9571846860598843
609	142.0	0.6995073891625616	0.47333333333333333	100.89949493661166	55.82909547253209	3.9636337757397744
610	87.0	0.5958904109589042	0.3020833333333333	64.72792206135786	39.82929801660998	3.773038371501055
611	91.0	0.7338709677419355	0.16727941176470587	69.94112549695427	41.11972415102396	3.0532561985965616
612	157.0	0.4197860962566845	0.15575396825396826	109.53300858899107	59.55014623622714	8.600399157551513
613	173.0	0.6336996336996337	0.12872023809523808	128.60407640085654	67.1236455402287	4.584681382478224
614	219.0	0.655688622754491	0.10863095238095238	131.65180361560903	69.768678183076	5.258484462834679
615	201.0	0.6568627450980392	0.2392857142857143	122.76955262170047	63.77900013828901	5.135623920798785
616	172.0	0.4085510688836104	0.19111111111111112	107.39696961966999	53.022457315641816	12.78586734099236
617	177.0	0.42650602409638555	0.12291666666666666	117.50357133746822	60.38735306518267	10.523646814307114
618	32.0	0.8205128205128205	0.6666666666666666	32.0	18.46986997208535	2.302477625137735
619	73.0	0.6460176991150443	0.4866666666666667	57.242640687119284	34.13454223738204	4.061665708465386
620	102.0	0.6455696202531646	0.20238095238095238	71.59797974644667	35.328200146453845	5.5513205146444795
621	205.0	0.584045584045584	0.21533613445378152	142.69848480983498	78.07375568384418	5.194442874318012
622	76.0	0.8	0.2923076923076923	53.17766952966369	29.556194013652657	3.4262041170513764
623	54.0	0.9310344827586207	0.8571428571428571	41.621320343559645	23.093410497786735	2.9574512305341303
624	457.0	0.3195804195804196	0.04800420168067227	295.4751801064719	159.67896773959987	15.76648265493886
625	82.0	0.780952380952381	0.45555555555555555	57.69238815542512	32.705969428022634	3.490378268009942
626	161.0	0.5709219858156028	0.1548076923076923	114.08326112068522	62.00366574426872	4.967411261205597
627	119.0	0.5639810426540285	0.16391184573002754	84.32590180780451	44.38318485623984	6.745214497087236
628	123.0	0.6949152542372882	0.5125	82.31370849898477	45.245639938215376	4.342257587828626
629	216.0	0.4897959183673469	0.32432432432432434	154.31980515339464	84.36864709833246	7.584818149308497
630	87.0	0.5918367346938775	0.3020833333333333	64.17766952966369	37.13155056543357	4.781191312416925
631	187.0	0.361003861003861	0.1894630192502533	116.74621202458749	56.106067927058426	16.00111217712608
632	71.0	0.7888888888888889	0.23355263157894737	50.18376618407356	25.89423528702099	3.9721288030613575
633	222.0	0.5186915887850467	0.08143800440205429	153.9655121145938	82.08308527876997	7.3336275926921
634	236.0	0.5974683544303797	0.11568627450980393	134.65180361560903	70.57831770957864	7.4433303288456445
635	64.0	0.8205128205128205	0.21768707482993196	48.52691193458119	27.378302822232857	3.129811827269531
636	113.0	0.7793103448275862	0.16051136363636365	76.53300858899107	41.38439292851761	3.695329690067486
637	136.0	0.7861271676300579	0.17435897435897435	92.32590180780451	47.996332744515115	4.011872712656915
638	244.0	0.5093945720250522	0.06455026455026455	171.80003589374985	98.12675346653793	4.840117379335622
639	146.0	0.3659147869674185	0.22919937205651492	108.25483399593904	56.56897410078647	11.291625359629943
640	100.0	0.5714285714285714	0.19230769230769232	76.62741699796952	44.89895275844305	4.197623279321164
641	38.0	0.8636363636363636	0.35185185185185186	29.17766952966369	15.485314013049262	3.19366713216251
642	91.0	0.7711864406779662	0.337037037037037	65.97056274847714	35.067462519495436	3.4787694786711514
643	241.0	0.6070528967254408	0.09395711500974659	151.3797256769669	81.24346425590436	5.179240033179811
644	119.0	0.6502732240437158	0.14	84.60407640085654	46.71786128719855	4.5517695945071805
645	98.0	0.5798816568047337	0.15555555555555556	69.59797974644667	39.769220288843336	5.29072693524549
646	208.0	0.6208955223880597	0.09876543209876543	137.0304832720494	71.48006147018836	5.4093045330895055
647	159.0	0.691304347826087	0.12421875	103.19595949289331	55.54521857855321	4.318149816100824
648	142.0	0.5126353790613718	0.2531194295900178	107.24873734152916	56.43999872377937	6.068384818693514
649	107.0	0.7985074626865671	0.15689149560117302	78.5685424949238	42.09150577460003	3.3962360478893547
650	105.0	0.7094594594594594	0.47297297297297297	75.31370849898477	40.40110330278357	4.386467981293983
651	166.0	0.6125461254612546	0.09496567505720824	114.68124086713189	65.35965648596874	5.1418876390431185
652	214.0	0.44306418219461696	0.11655773420479303	136.64570696119915	67.86282395610743	11.320023545466407
653	131.0	0.6894736842105263	0.15232558139534882	99.29036790187178	52.89958663123054	3.759234019837625
654	126.0	0.6206896551724138	0.18077474892395984	89.56244584051392	49.3247800820903	4.485334329616808
655	148.0	0.6948356807511737	0.3645320197044335	107.89949493661166	66.16324400450412	3.144327215872807
656	109.0	0.5677083333333334	0.28165374677002586	83.14213562373095	48.033190111799875	4.497949734750244
657	197.0	0.4087136929460581	0.19033816425120773	139.8050865276332	77.76541475780796	9.629171682203014
658	147.0	0.4083333333333333	0.25	105.18376618407356	56.339715829198454	8.97438316760697
659	152.0	0.5117845117845118	0.25982905982905985	101.35533905932738	52.15054443179243	8.237225194356768
660	111.0	0.6379310344827587	0.18226600985221675	74.29036790187179	38.95148207134621	5.337148392120436
661	116.0	0.7388535031847133	0.3945578231292517	90.07106781186548	54.48263986098965	2.95686048576524
662	110.0	0.7534246575342466	0.16129032258064516	76.5685424949238	41.44474922358771	3.8427178926106405
663	68.0	0.7555555555555555	0.41975308641975306	49.071067811865476	29.385409766355195	3.129186876882787
664	171.0	0.7434782608695653	0.11616847826086957	117.4386001800126	63.66779477614387	3.940143319954287
665	96.0	0.7164179104477612	0.1693121693121693	66.25483399593904	36.17123202571359	3.8387138135046954
666	114.0	0.8260869565217391	0.14074074074074075	75.63961030678928	43.648888786421644	3.5083497795050334
667	87.0	0.6397058823529411	0.33984375	68.3492424049175	36.31245537422534	4.495514867581538
668	103.0	0.5754189944134078	0.2400932400932401	72.07716446627535	39.83955747426731	5.89851718731119
669	81.0	0.675	0.3306122448979592	62.071067811865476	38.072735987866885	3.3756912466258395
670	149.0	0.5643939393939394	0.16722783389450055	90.8111831820431	47.272179442359146	7.821763032967298
671	84.0	0.8155339805825242	0.2809364548494983	54.49137802864845	28.007415448723155	4.068529691531998
672	108.0	0.5094339622641509	0.2634146341463415	80.17766952966369	46.370847774059456	6.227370392864838
673	99.0	0.7021276595744681	0.3535714285714286	67.76345596729058	38.62528627580126	4.088242507419546
674	150.0	0.4966887417218543	0.0962772785622593	105.78174593052023	61.86177080865742	6.200034155410135
675	130.0	0.7831325301204819	0.15531660692951016	81.05382386916237	44.06238017192436	4.473898301352241
676	56.0	0.835820895522388	0.25	41.698484809834994	22.48345469783485	3.5217081247193307
677	186.0	0.3705179282868526	0.09011627906976744	126.78174593052023	70.24735680576279	9.578903246914509
678	258.0	0.4195121951219512	0.13230769230769232	168.01828996322962	87.1917008781388	11.523018001019407
679	117.0	0.8357142857142857	0.15096774193548387	81.05382386916237	43.71270639163298	3.5579505472322266
680	154.0	0.7264150943396226	0.10461956521739131	107.78174593052023	60.57397664885275	3.8526098162269258
681	249.0	0.2648936170212766	0.14028169014084507	166.09545442950497	84.54638711774646	19.260490778911834
682	168.0	0.5472312703583062	0.11570247933884298	116.61017305526643	61.59578961149608	7.069390060850846
683	149.0	0.6478260869565218	0.12542087542087543	112.25483399593904	64.19317099335555	3.4009841028131365
684	104.0	0.7536231884057971	0.22657952069716775	65.2193000900063	33.51918967952349	4.747564324483473
685	80.0	0.6557377049180327	0.3686635944700461	57.86396103067893	34.782007460016146	4.044991600903685
686	138.0	0.647887323943662	0.1597222222222222	90.8111831820431	47.12335186063935	4.949024046516731
687	170.0	0.625	0.136	117.60407640085654	62.87082549327096	4.394845289253158
688	140.0	0.717948717948718	0.12544802867383512	97.19595949289334	53.69688430206842	3.7383456896301976
689	169.0	0.6450381679389313	0.4470899470899471	120.69238815542512	72.28136576000975	3.9812519050840147
690	151.0	0.6371308016877637	0.12699747687132043	104.95331880577403	57.064320224756244	4.560506528063204
691	119.0	0.7628205128205128	0.18364197530864199	73.98275605729691	38.8389756423757	4.768998733459851
692	134.0	0.5654008438818565	0.19940476190476192	99.698484809835	56.64623147828511	4.606232710231567
693	160.0	0.6274509803921569	0.39215686274509803	107.42031021678298	56.8098094056517	4.9343115318683095
694	124.0	0.7167630057803468	0.16756756756756758	89.08326112068522	46.44956378779125	3.757190953555155
695	186.0	0.577639751552795	0.115527950310559	119.09545442950498	61.443459383971664	7.626571279680443
696	148.0	0.669683257918552	0.12171052631578948	100.57463914933368	55.31061785383027	4.362916605370614
697	116.0	0.651685393258427	0.30526315789473685	80.83452377915607	43.098096176083935	4.539953844241214
698	115.0	0.732484076433121	0.14687100893997446	78.43250352560273	43.03091268447535	4.013397417907181
699	279.0	0.5923566878980892	0.1956521739130435	209.16042558696057	68.96122914001911	9.651376625519523
700	102.0	0.6580645161290323	0.15987460815047022	69.25483399593904	38.82828186995542	5.236877736471726
701	37.0	0.8409090909090909	0.47435897435897434	28.692388155425114	15.290906409427734	3.163850327019523
702	105.0	0.7720588235294118	0.14423076923076922	72.39696961967	42.86135512275074	3.410364532978511
703	110.0	0.55	0.24175824175824176	80.52691193458118	42.15812735298676	6.49027757865771
704	107.0	0.5721925133689839	0.2123015873015873	78.11269837220809	41.22447569610337	5.50511135777573
705	156.0	0.78	0.13978494623655913	96.61017305526643	52.27316877561708	4.266790831453487
706	287.0	0.574	0.09519071310116087	171.3797256769669	90.25827939122757	5.572707073381701
707	107.0	0.7379310344827587	0.1737012987012987	73.74011537017762	39.73565328483972	4.151472946148666
708	155.0	0.5363321799307958	0.15995872033023736	113.94112549695427	67.4565568010075	5.208521764850978
709	119.0	0.7041420118343196	0.2	83.01219330881976	43.130105218586785	4.276106973483538
710	161.0	0.6313725490196078	0.11549497847919656	110.2670273047588	58.83523177460304	5.04236222119009
711	168.0	0.6131386861313869	0.14685314685314685	119.49747468305831	64.340243522743	4.074596643907712
712	32.0	0.8421052631578947	0.41025641025641024	26.656854249492383	15.222603305580213	2.8323750812592583
713	155.0	0.4696969696969697	0.17613636363636365	113.97665940288702	63.39976186605684	6.601246824297454
714	166.0	0.680327868852459	0.11789772727272728	107.40306627407988	58.402271902522436	4.194295383172688
715	206.0	0.7383512544802867	0.11004273504273504	127.44469683442247	67.35392162275232	4.2879331721702
716	133.0	0.7388888888888889	0.13434343434343435	88.12489168102785	47.323964902792646	4.313566377854071
717	78.0	0.7878787878787878	0.7647058823529411	65.65685424949238	41.22953425468458	2.9346255581888023
718	190.0	0.5013192612137203	0.1	132.88834764831844	70.41676455204515	7.240012028785795
719	137.0	0.6372093023255814	0.14094650205761317	93.88225099390856	48.500588392890286	5.733401334163083
720	92.0	0.8141592920353983	0.6571428571428571	67.44974746830583	39.0770103963511	3.1617574668701387
721	206.0	0.5522788203753352	0.0876595744680851	135.48023074035524	76.77567816072609	6.295957679046177
722	96.0	0.7007299270072993	0.17422867513611615	72.25483399593904	37.87087080208517	3.94078464022858
723	103.0	0.6866666666666666	0.2641025641025641	68.1126983722081	34.60562912791748	5.387541617916516
724	260.0	0.4529616724738676	0.09285714285714286	168.48023074035524	88.29961858720525	9.154613217001318
725	127.0	0.7055555555555556	0.17162162162162162	88.29036790187178	45.52064311549305	4.193888623606748
726	98.0	0.765625	0.129973474801061	69.53300858899107	41.33858285106703	3.6047359082657255
727	34.0	0.8717948717948718	0.3148148148148148	26.970562748477143	14.298474141694259	3.1540610151233173
728	247.0	0.36592592592592593	0.10291666666666667	154.99494936611663	79.14971625374741	11.42591128678443
729	77.0	0.6814159292035398	0.45294117647058824	67.44974746830583	38.604006070474966	3.010338375608341
730	172.0	0.6013986013986014	0.1355397951142632	114.71067811865474	60.65033652245957	6.009201561013574
731	101.0	0.6047904191616766	0.28055555555555556	73.00609665440987	38.374510273194616	5.588724365171366
732	147.0	0.7577319587628866	0.1396011396011396	97.29646455628165	51.410076648206186	3.9581072894733107
733	95.0	0.625	0.12179487179487179	67.25483399593904	42.034893941792745	4.390621003694159
734	72.0	0.7659574468085106	0.27692307692307694	56.17766952966369	30.74951286783189	3.162012427010964
735	150.0	0.6976744186046512	0.13020833333333334	97.19595949289332	51.67142688897082	5.369940919597301
736	165.0	0.673469387755102	0.14423076923076922	108.46803743153548	56.40180266175014	4.582507457166408
737	138.0	0.7840909090909091	0.12683823529411764	94.36753236814712	50.879503357246705	3.7626965931301104
738	117.0	0.5763546798029556	0.09069767441860466	80.39087296526012	55.054097605066254	3.6290411660205484
739	88.0	0.8148148148148148	0.20952380952380953	67.11269837220809	35.49843799877574	3.240904446376882
740	182.0	0.32212389380530976	0.1456	125.26702730475881	62.73454639134872	15.32370738413359
741	124.0	0.6078431372549019	0.11355311355311355	92.5685424949238	51.204629344122054	4.860657997230295
742	147.0	0.5975609756097561	0.20851063829787234	100.76955262170047	53.186941768849366	5.408208655143835
743	131.0	0.6238095238095238	0.15321637426900586	99.01219330881976	53.92027285530308	4.263263106712995
744	138.0	0.5476190476190477	0.09517241379310344	94.66904755831213	66.75640090853155	4.642261474070485
745	153.0	0.7320574162679426	0.10625	107.50966799187808	58.5876007959478	4.071703480110406
746	116.0	0.7295597484276729	0.12393162393162394	72.91168824543142	48.79069199246055	3.3237700626766116
747	139.0	0.6123348017621145	0.10775193798449613	102.12489168102785	56.592696928271955	4.8692921639745075
748	172.0	0.7782805429864253	0.13364413364413363	104.8528137423857	55.71965389490289	4.567325462673906
749	136.0	0.48056537102473496	0.1259259259259259	96.01828996322962	52.37675564692925	7.995286289430935
750	111.0	0.6491228070175439	0.10432330827067669	81.25483399593904	54.22144880926061	3.4551039970874426
751	231.0	0.6434540389972145	0.105	141.4802307403552	73.7347608702285	5.772296527979669
752	111.0	0.6379310344827587	0.1989247311827957	75.2193000900063	38.59741719368939	5.011369871189724
753	334.0	0.3901869158878505	0.05872011251758087	225.04877323527901	120.42554104111869	9.212995350020499
754	204.0	0.5190839694656488	0.07891682785299807	134.40916292848976	79.88772437442034	6.118898709739695
755	295.0	0.2817574021012416	0.05673076923076923	205.5929291125633	116.95641226701892	13.806779127657022
756	119.0	0.5265486725663717	0.2236842105263158	82.31980515339464	43.408781075506255	7.714634799934322
757	163.0	0.6936170212765957	0.1229260935143288	106.85281374238569	56.98189207127473	5.025572669830501
758	167.0	0.5585284280936454	0.22266666666666668	109.18376618407356	58.53878912671638	6.063956770596554
759	172.0	0.5602605863192183	0.09144072301967039	121.81118318204308	75.55695841478439	4.5276638359964085
760	182.0	0.629757785467128	0.11818181818181818	116.88834764831844	63.21588782083342	5.302973755031754
761	133.0	0.5384615384615384	0.12618595825426945	91.63961030678928	50.480447968368345	6.269939339527823
762	104.0	0.8	0.27956989247311825	71.07716446627533	36.422284338212286	3.8851921933560853
763	64.0	0.7901234567901234	0.28444444444444444	42.49137802864845	22.167632752692317	4.072867005165143
764	69.0	0.7840909090909091	0.36507936507936506	48.384776310850235	24.74712557336872	3.8447970514367857
765	113.0	0.6848484848484848	0.17384615384615384	75.7401153701776	39.79626085559989	5.128053809834027
766	91.0	0.6946564885496184	0.52	68.48528137423858	40.58810067094428	3.373661827951123
767	88.0	0.7521367521367521	0.18219461697722567	59.840620433565945	32.79523213671981	4.166922721437083
768	128.0	0.7664670658682635	0.5688888888888889	90.31370849898475	48.82694152000466	3.878790555965253
769	195.0	0.5508474576271186	0.12037037037037036	120.4386001800126	61.16479826053288	7.183491426899078
770	92.0	0.7419354838709677	0.19166666666666668	62.0477272147525	33.152129739158106	4.078460039170444
771	121.0	0.49794238683127573	0.2951219512195122	86.24873734152916	48.2910423211504	7.429680199558556
772	245.0	0.46577946768060835	0.08974358974358974	168.82337649086284	87.6810994123119	7.092831198567946
773	286.0	0.47429519071310117	0.06571691176470588	185.7645019878171	105.45516981236952	9.499992179916227
774	157.0	0.6382113821138211	0.08702882483370289	99.40306627407988	67.26586382903031	3.9671944361377642
775	191.0	0.5441595441595442	0.12259306803594351	119.43860018001261	62.55005913155647	8.377196388063567
776	315.0	0.41392904073587383	0.0625	208.4213562373095	115.45694098650965	8.006135434367518
777	93.0	0.5740740740740741	0.13285714285714287	71.31980515339464	45.288197813011266	4.1323991076892055
778	188.0	0.8034188034188035	0.16	113.05382386916236	59.3752392229125	4.374726614659994
779	131.0	0.8238993710691824	0.13232323232323231	88.95331880577403	48.604858723724526	3.8569750971022687
780	132.0	0.6947368421052632	0.11282051282051282	83.39696961966999	54.95516251696114	3.597633745314659
781	86.0	0.8775510204081632	0.21553884711779447	54.669047558312144	28.6856879736332	3.9515579302896353
782	142.0	0.5819672131147541	0.14087301587301587	101.18986283848344	53.74835616694283	5.0446671644794305
783	211.0	0.65527950310559	0.17016129032258065	138.3259018078045	72.0260878394115	4.627417710352815
784	115.0	0.6609195402298851	0.15151515151515152	80.36143571373725	44.16283675724141	4.986028952375614
785	96.0	0.6114649681528662	0.34285714285714286	70.34924240491749	39.4235089051483	4.522375057560743
786	144.0	0.5454545454545454	0.11822660098522167	105.29646455628166	56.34040486743571	5.178851973988953
787	109.0	0.6337209302325582	0.1634182908545727	76.08326112068524	39.66911359777771	4.815736998629412
788	118.0	0.5388127853881278	0.12688172043010754	86.15432893255071	47.58316719147067	6.31397901686315
789	114.0	0.5846153846153846	0.19063545150501673	84.59188309203678	53.12809947678313	3.8900317084756577
790	51.0	0.7183098591549296	0.2217391304347826	44.72792206135786	26.26410576237383	2.849401001143509
791	301.0	0.5574074074074075	0.11337099811676082	158.30865786510142	82.75274829742096	6.724222947747079
792	94.0	0.4413145539906103	0.21266968325791855	67.94112549695429	32.83821009227134	10.151080889408247
793	46.0	0.8214285714285714	0.3865546218487395	36.72792206135786	19.240814471989367	3.0974927120152396
794	79.0	0.797979797979798	0.2762237762237762	59.45584412271572	31.170657457696368	3.416659453371954
795	163.0	0.649402390438247	0.11319444444444444	104.19595949289334	58.58234365521436	4.9935195919595525
796	187.0	0.656140350877193	0.10274725274725274	131.5452018978108	69.88875385582118	4.572022175882357
797	259.0	0.369472182596291	0.08222222222222222	170.79393923933998	89.17545098354928	11.38441325529661
798	122.0	0.7305389221556886	0.17941176470588235	82.32590180780451	43.12381465367136	4.243100688652394
799	160.0	0.48632218844984804	0.33542976939203356	114.73401871576772	59.60676294892797	8.548175872682272
800	116.0	0.7682119205298014	0.17261904761904762	79.08326112068524	41.325040647178334	3.908083948227699
801	46.0	0.8363636363636363	0.36507936507936506	35.31370849898476	20.46548426908526	2.9165233826039514
802	172.0	0.6035087719298246	0.13848631239935588	120.77564927611034	65.68345262139427	4.350317597453154
803	111.0	0.7161290322580646	0.1825657894736842	79.25483399593904	41.33305797633724	4.085051268528072
804	238.0	0.42882882882882883	0.17246376811594202	155.39696961967002	81.62842426374564	9.156941187198884
805	119.0	0.7	0.15454545454545454	81.11879502661797	45.70320096384804	4.087437701054889
806	94.0	0.7175572519083969	0.19583333333333333	65.25483399593904	33.77294139589473	4.619179841426511
807	101.0	0.8487394957983193	0.15538461538461537	68.5685424949238	38.740623984334974	3.513673038507516
808	113.0	0.7902097902097902	0.16815476190476192	74.70458146424487	40.85936814915937	3.7652570867936723
809	99.0	0.4541284403669725	0.1644518272425249	83.21320343559643	50.35935168412031	5.182770854377871
810	251.0	0.2810750279955207	0.11492673992673992	156.75230867899737	74.38990082148939	21.04635040082287
811	202.0	0.4938875305623472	0.3252818035426731	144.8700576850888	78.68597602852967	7.2742818637798345
812	104.0	0.574585635359116	0.23059866962305986	81.72792206135784	46.07709781713278	4.761643214216004
813	61.0	0.8243243243243243	0.2675438596491228	44.8700576850888	22.954455064456404	3.5258871351353736
814	103.0	0.7862595419847328	0.1634920634920635	71.49747468305833	39.885851243238776	3.5145912435046722
815	97.0	0.8434782608695652	0.16166666666666665	59.49747468305832	36.358525096042634	3.676185964181326
816	140.0	0.7329842931937173	0.13806706114398423	98.26093065034891	51.3231886872551	3.904954586080315
817	671.0	0.16629491945477076	0.07093023255813953	347.9310242291876	152.85271312297357	48.75667084146363
818	131.0	0.7359550561797753	0.14971428571428572	89.63961030678928	47.833829217271024	4.156074541719627
819	208.0	0.5430809399477807	0.0962962962962963	136.85891039679558	73.45582087480526	6.6483524024900245
820	150.0	0.44642857142857145	0.12919896640826872	106.63961030678928	56.40897759785771	7.529063814309449
821	104.0	0.7272727272727273	0.1750841750841751	77.25483399593904	41.25291944060318	3.447605943191641
822	125.0	0.6648936170212766	0.12065637065637065	76.1543289325507	49.26529033284399	4.421977885583368
823	199.0	0.7425373134328358	0.12193627450980392	122.50966799187808	65.68816575255588	4.232952731504296
824	370.0	0.3291814946619217	0.18271604938271604	266.32590180780454	152.84043751081418	11.767627952937925
825	213.0	0.4660831509846827	0.09943977591036414	146.4386001800126	79.76857226995553	6.759743756664739
826	75.0	0.6756756756756757	0.2508361204013378	52.07716446627535	28.87914593127249	4.373688660900532
827	174.0	0.710204081632653	0.1686046511627907	104.81118318204308	54.88107274065397	4.832039451870267
828	136.0	0.5375494071146245	0.15813953488372093	99.9116882454314	52.65757929932451	5.9943975963363805
829	132.0	0.6111111111111112	0.29931972789115646	90.9350288425444	55.83081110094436	3.7653218230878425
830	154.0	0.4128686327077748	0.11047345767575323	106.1543289325507	56.84251123484226	10.530181714489682
831	108.0	0.75	0.2887700534759358	73.83452377915607	39.73807571456712	3.7975899817268415
832	100.0	0.684931506849315	0.14285714285714285	72.77564927611036	40.51132406383534	4.32247875586631
833	173.0	0.6811023622047244	0.1130718954248366	116.50966799187809	62.96160518026149	4.246410604139921
834	85.0	0.7657657657657657	0.4722222222222222	59.27817459305202	33.84780632301541	3.49396714746959
835	121.0	0.7756410256410257	0.6173469387755102	95.44974746830583	55.25590066817506	2.9045518540868285
836	50.0	0.7936507936507936	0.47619047619047616	37.656854249492376	23.48567220289504	2.795568131554544
837	61.0	0.8133333333333334	0.41496598639455784	43.72792206135785	23.944051755493344	3.386948587718143
838	146.0	0.6886792452830188	0.12006578947368421	98.40306627407988	55.63255638713734	4.133276290150345
839	117.0	0.6724137931034483	0.17333333333333334	76.53300858899107	39.22672069911625	5.910428778818797
840	233.0	0.483402489626556	0.10401785714285715	162.7462120245875	86.35513195842488	5.475787049409982
841	131.0	0.5720524017467249	0.2847826086956522	95.24873734152916	51.361480279144764	4.913123063960972
842	121.0	0.5307017543859649	0.15572715572715573	87.25483399593904	47.1409240212219	4.942238507643477
843	120.0	0.7894736842105263	0.17045454545454544	80.94722215136416	41.353713189136656	3.9336673479029916
844	155.0	0.625	0.12301587301587301	108.5035713374682	58.98624693897622	4.367735722586601
845	37.0	0.8043478260869565	0.4111111111111111	28.692388155425117	16.74091580789179	2.92572270145153
846	164.0	0.784688995215311	0.1423611111111111	99.19595949289332	53.01319305946225	4.440825747955556
847	127.0	0.8141025641025641	0.1425364758698092	83.88225099390857	46.34812943647373	3.672155362662736
848	136.0	0.6601941747572816	0.13076923076923078	91.39696961966999	49.88427520228173	4.6568498121345865
849	142.0	0.6454545454545455	0.2679245283018868	105.76345596729058	58.501813683795014	3.9584237843745007
850	67.0	0.7362637362637363	0.19940476190476192	49.83452377915607	28.669841343182764	3.5324434621345735
851	125.0	0.6097560975609756	0.15096618357487923	91.94112549695427	53.50313109346275	4.17974391509092
852	94.0	0.7121212121212122	0.24102564102564103	66.698484809835	35.70111017921915	3.8880024001890385
853	172.0	0.5165165165165165	0.12490922294843863	115.67514421272202	62.096402975199574	7.278398353553153
854	123.0	0.76875	0.5347826086956522	87.48528137423858	52.59150207893181	3.1907633907490287
855	166.0	0.5533333333333333	0.16550348953140578	123.76955262170048	66.34464822230656	5.201255702312348
856	93.0	0.5568862275449101	0.19375	69.73401871576773	37.5405333818949	5.165909095782051
857	105.0	0.6645569620253164	0.29914529914529914	75.34924240491749	44.357984469550395	3.907578335446672
858	209.0	0.3078055964653903	0.1244047619047619	146.46803743153546	75.16801489021952	13.20562648687195
859	143.0	0.7295918367346939	0.3783068783068783	99.69238815542512	60.15519225474021	3.35859735679821
860	260.0	0.4659498207885305	0.14444444444444443	186.66904755831212	102.49429102334452	7.750446441850575
861	141.0	0.5662650602409639	0.15460526315789475	107.45584412271572	68.37885311648137	3.4466433749285352
862	127.0	0.6318407960199005	0.16344916344916344	88.53300858899107	47.01003920781629	4.606243154904029
863	104.0	0.5098039215686274	0.22857142857142856	77.5269119345812	41.756841660909956	6.47509269379743
864	42.0	0.8571428571428571	0.375	30.349242404917497	16.736492293313162	3.230878912979604
865	95.0	0.76	0.4634146341463415	78.44974746830583	44.86130445497669	2.880305605629695
866	193.0	0.6348684210526315	0.21162280701754385	142.79898987322332	88.85694350719275	3.2724598786881898
867	52.0	0.7878787878787878	0.39097744360902253	40.520815280171306	21.65939086130404	3.295292581506599
868	116.0	0.703030303030303	0.1318181818181818	87.84062043356595	49.092338376163134	3.2803028034101316
869	148.0	0.5648854961832062	0.14015151515151514	108.7401153701776	59.72159732709681	5.592562797684933
870	197.0	0.5596590909090909	0.24533001245330013	141.62741699796953	83.58205258765568	4.1097858398670315
871	169.0	0.476056338028169	0.17604166666666668	126.2842712474619	75.57994859509921	5.746869146439596
872	67.0	0.8481012658227848	0.6979166666666666	47.24264068711929	27.53829168020966	3.2630683368953797
873	191.0	0.6366666666666667	0.1138938580799046	120.54520189781083	64.80659424728806	5.496960801499918
874	174.0	0.44387755102040816	0.17827868852459017	128.56244584051393	71.99967577860033	8.326071983254904
875	87.0	0.635036496350365	0.5117647058823529	64.89949493661166	40.100872111089245	4.237295222961732
876	123.0	0.5125	0.35964912280701755	84.1126983722081	44.0679198885011	7.358441903776033
877	141.0	0.6746411483253588	0.25636363636363635	103.14213562373095	61.28799270465528	3.5830483012717003
878	118.0	0.6413043478260869	0.13866039952996476	82.49747468305833	47.31800189462713	4.64098348689488
879	168.0	0.5833333333333334	0.12191582002902758	121.01828996322963	64.80986059540504	5.661562045664498
880	426.0	0.6264705882352941	0.21471774193548387	231.27922061357856	75.62428121618083	12.326397519644068
881	186.0	0.49076517150395776	0.1276595744680851	117.12489168102785	61.82318084366001	8.425854001580968
882	102.0	0.6845637583892618	0.40476190476190477	76.07106781186548	46.65144085087931	3.4124191429187345
883	241.0	0.5807228915662651	0.10909913988229969	140.0660171779821	74.43406199221666	7.220323942001577
884	95.0	0.76	0.2777777777777778	68.72792206135784	42.2170375398346	2.9622690220653802
885	117.0	0.7090909090909091	0.13912009512485138	81.63961030678928	45.36018502636216	4.1969861343816115
886	101.0	0.6273291925465838	0.255050505050505	75.62741699796952	39.71988540359282	5.052760614824174
887	122.0	0.6321243523316062	0.1831831831831832	87.25483399593904	46.491233059064584	4.765539940730534
888	170.0	0.4509283819628647	0.0830078125	129.98275605729688	81.80938372894613	5.6956573314023595
889	170.0	0.5396825396825397	0.4497354497354497	122.42031021678297	72.58674805548594	5.288048136712787
890	132.0	0.4697508896797153	0.1746031746031746	101.83452377915606	65.3831827213128	5.317376729617866
891	168.0	0.65625	0.16600790513833993	108.56854249492379	56.21882715811036	5.485617471498592
892	157.0	0.6254980079681275	0.26700680272108845	94.5269119345812	49.368451381219586	6.061729752617115
893	91.0	0.7054263565891473	0.22303921568627452	66.42031021678298	38.740979712473866	3.2832928945708284
894	137.0	0.5036764705882353	0.29782608695652174	97.04163056034261	52.77223075448821	7.288895506685728
895	41.0	0.9111111111111111	0.803921568627451	33.621320343559645	19.14815987462556	2.777698998507419
896	138.0	0.6448598130841121	0.21036585365853658	93.59797974644665	49.480209536663025	5.14102531121559
897	131.0	0.5057915057915058	0.25387596899224807	91.698484809835	49.86563905675842	6.64270848276887
898	141.0	0.5802469135802469	0.4519230769230769	100.9350288425444	56.72334970025397	5.609525791777071
899	124.0	0.7560975609756098	0.5166666666666667	86.65685424949238	51.95075641421548	3.263851548317466
900	56.0	0.691358024691358	0.49122807017543857	39.10660171779821	20.969001152080715	4.59258173695017
901	62.0	0.7848101265822784	0.29523809523809524	47.00609665440988	24.933334466985162	3.4245255936600696
902	186.0	0.46384039900249374	0.12525252525252525	128.46803743153546	69.69122359323852	8.778359090625537
903	98.0	0.6363636363636364	0.3202614379084967	72.17766952966369	38.05291153258708	4.2408827786103895
904	72.0	0.8674698795180723	0.32142857142857145	43.49137802864845	21.57982620142858	4.584863973919671
905	217.0	0.4549266247379455	0.08560157790927021	159.40916292848976	85.24479914974378	8.112882085507165
906	145.0	0.6277056277056277	0.3236607142857143	104.89949493661166	62.630476332481344	4.116841126247853
907	177.0	0.7023809523809523	0.10399529964747356	110.61017305526642	61.60215841996021	4.167005405089809
908	116.0	0.7295597484276729	0.18412698412698414	82.25483399593904	42.922978962955106	4.1539395096553156
909	167.0	0.6600790513833992	0.1237037037037037	117.5035713374682	63.01777436848537	4.011005376276842
910	109.0	0.48660714285714285	0.21626984126984128	82.83452377915606	46.9974746625639	5.872901627273819
911	206.0	0.4336842105263158	0.13966101694915253	139.77564927611036	72.22318346403186	8.891290925672093
912	285.0	0.5654761904761905	0.19764216366158113	203.698484809835	116.74644742189525	4.772933643039804
913	153.0	0.7149532710280374	0.2401883830455259	104.69848480983498	55.78595041841055	4.216351824778965
914	199.0	0.7289377289377289	0.4806763285024155	137.97056274847714	78.54529794269783	3.630961929627931
915	155.0	0.5535714285714286	0.1497584541062802	106.94722215136417	54.98235795576746	6.772260967996649
916	100.0	0.6711409395973155	0.2564102564102564	65.31980515339464	32.862244772501924	4.9992868003516
917	112.0	0.6666666666666666	0.14285714285714285	70.32590180780451	43.00918871557932	4.445158144053311
918	152.0	0.7307692307692307	0.09993425378040763	100.2670273047588	59.852410793088964	3.934875294716273
919	145.0	0.6304347826086957	0.1432806324110672	102.32590180780451	56.70718304063478	4.633100205851937
920	58.0	0.7945205479452054	0.36024844720496896	44.071067811865476	25.858955708290726	3.195459497599101
921	87.0	0.7767857142857143	0.5576923076923077	74.03553390593274	42.35177427057747	2.7649997824388994
922	149.0	0.7680412371134021	0.16125541125541126	96.7401153701776	51.11631460365203	4.238126107386555
923	67.0	0.7613636363636364	0.24363636363636362	50.79898987322333	28.46042937928005	3.236837368798033
924	181.0	0.6678966789667896	0.18319838056680163	117.46194077712558	60.263559001556814	4.56867507667704
925	88.0	0.7394957983193278	0.2857142857142857	62.4558441227157	32.29603777590943	4.045075795570067
926	131.0	0.6517412935323383	0.5137254901960784	95.27817459305203	58.117601036396174	3.7666716800787707
927	201.0	0.475177304964539	0.10983606557377049	139.53910524340094	75.45566091539067	7.318333841002248
928	105.0	0.6325301204819277	0.375	82.31370849898475	46.35877879426101	4.05508003080697
929	211.0	0.596045197740113	0.26375	111.84062043356593	57.58356063562389	7.638571888903964
930	231.0	0.4494163424124514	0.08571428571428572	168.5035713374682	93.19259921064148	6.58312233121419
931	131.0	0.6822916666666666	0.33418367346938777	92.72792206135784	54.26188518217975	3.6391337698594866
932	152.0	0.8306010928961749	0.14393939393939395	93.19595949289332	50.56518331669907	4.06885585259197
933	198.0	0.6407766990291263	0.2456575682382134	133.11269837220811	71.2751533887206	4.618166405610325
934	69.0	0.5948275862068966	0.3520408163265306	50.72792206135786	31.469413859920028	4.035845339426219
935	158.0	0.5939849624060151	0.1234375	104.36753236814714	56.98675886578388	6.307032728147321
936	133.0	0.7430167597765364	0.532	99.07106781186548	54.47599965486094	3.602819311001829
937	42.0	0.8936170212765957	0.3333333333333333	30.97056274847714	17.526776310463994	3.1015106639806573
938	106.0	0.8617886178861789	0.2409090909090909	60.66904755831214	31.58098924966925	4.522279820255274
939	166.0	0.564625850340136	0.20933165195460277	118.83452377915606	70.69813794108349	4.440608316051584
940	189.0	0.48091603053435117	0.109375	130.98885271170678	66.72254667790548	8.272315690277754
941	95.0	0.8050847457627118	0.2261904761904762	66.35533905932738	33.45785167730352	3.9772727509790133
942	76.0	0.7676767676767676	0.31275720164609055	56.970562748477136	31.39257853535007	3.3368880362014073
943	149.0	0.6866359447004609	0.18259803921568626	106.63351365237939	56.37362916505124	3.8267710464935014
944	350.0	0.4107981220657277	0.1709819247679531	199.9827560572969	105.56963839683642	9.035755944905523
945	148.0	0.6666666666666666	0.48366013071895425	102.31370849898477	57.34536147907872	3.979359506063685
946	37.0	0.8409090909090909	0.49333333333333335	28.863961030678926	16.215773631617644	2.8831201252627245
947	151.0	0.45209580838323354	0.11005830903790087	108.53300858899107	63.986299769759626	7.012454619985305
948	116.0	0.6666666666666666	0.1895424836601307	80.08326112068522	41.47907785149253	4.8858321950165395
949	96.0	0.7441860465116279	0.16	68.01219330881975	40.889471073384065	3.4674742336620605
950	89.0	0.8317757009345794	0.16856060606060605	63.74011537017761	35.7590768409855	3.486508025730449
951	196.0	0.725925925925926	0.19444444444444445	130.56244584051393	69.64742305638822	3.876194408892287
952	203.0	0.405189620758483	0.1895424836601307	135.08326112068522	73.64432524145923	9.85432864202549
953	144.0	0.6	0.22641509433962265	106.42031021678297	60.79392514461271	4.359949465118548
954	170.0	0.6563706563706564	0.10911424903722722	111.30256121069154	61.90398544845984	4.496839812116409
955	126.0	0.6028708133971292	0.14806110458284372	90.9827560572969	48.497306791221455	5.52491750743901
956	161.0	0.817258883248731	0.15862068965517243	94.12489168102786	50.86423672176549	4.2967697271858984
957	41.0	0.7884615384615384	0.4880952380952381	31.31370849898476	16.490696100787666	3.4999549320949077
958	52.0	0.6842105263157895	0.24761904761904763	39.520815280171306	26.497842898159814	3.0789131783514057
959	127.0	0.7559523809523809	0.17255434782608695	81.9827560572969	42.53287502904471	4.271069694895431
960	81.0	0.6639344262295082	0.3103448275862069	62.24873734152917	33.03492736987792	3.8296793150630735
961	79.0	0.7247706422018348	0.20572916666666666	55.734018715767725	32.11648587249354	3.6105043341698817
962	43.0	0.7288135593220338	0.28104575163398693	34.48528137423857	20.721304471953577	3.281816701403908
963	108.0	0.7297297297297297	0.23684210526315788	81.04163056034261	43.55667973675912	3.4105478835995107
964	111.0	0.6032608695652174	0.1417624521072797	77.70458146424487	41.1374445920063	5.967575651110696
965	44.0	0.8461538461538461	0.275	35.17766952966369	19.65605273148044	2.9617262571377214
966	112.0	0.5209302325581395	0.19047619047619047	76.42640687119287	38.99441985075535	7.862596554869748
967	73.0	0.7156862745098039	0.2673992673992674	52.2842712474619	27.13544958284956	4.023281989499297
968	187.0	0.5404624277456648	0.17314814814814813	109.9827560572969	55.925936833728365	8.538575948235428
969	95.0	0.7851239669421488	0.19547325102880658	67.0477272147525	34.39949503462441	3.8545514457086303
970	151.0	0.5136054421768708	0.15729166666666666	98.53300858899107	50.382605098174594	8.3847450490111
971	228.0	0.33284671532846716	0.08558558558558559	165.98885271170678	92.67009310211259	11.519835030916784
972	191.0	0.6262295081967213	0.19650205761316872	121.25483399593905	63.51052758695738	5.054253178610869
973	83.0	0.48255813953488375	0.14638447971781304	60.45584412271572	37.15980864683169	6.431736212572861
974	32.0	0.8888888888888888	0.5079365079365079	23.106601717798213	11.186780422236295	3.703419876907123
975	41.0	0.7068965517241379	0.25625	31.97056274847714	19.31071024756665	3.5254800934332544
976	107.0	0.7278911564625851	0.17892976588628762	71.7401153701776	37.945712837470275	4.197238003387697
977	51.0	0.75	0.23076923076923078	38.00609665440988	22.51456319635519	3.6989066541913407
978	110.0	0.582010582010582	0.13079667063020214	78.74011537017762	45.184467769666284	5.908243685425298
979	57.0	0.76	0.285	45.798989873223334	24.16548210995915	3.4503809123984097
980	81.0	0.627906976744186	0.1705263157894737	52.49137802864844	35.10053418636312	3.864342508964349
981	165.0	0.7638888888888888	0.12672811059907835	106.40306627407986	55.24085479008477	4.09226808899322
982	93.0	0.6788321167883211	0.22355769230769232	65.94112549695429	34.42762644927741	3.9250936216490553
983	73.0	0.776595744680851	0.2896825396825397	56.520815280171306	32.28050838153695	2.9884252004348455
984	116.0	0.7204968944099379	0.11934156378600823	83.22539674441619	49.16450275458037	3.551096955099153
985	220.0	0.3374233128834356	0.086716594402838	155.13098833543773	81.324664918541	12.901061517709419
986	112.0	0.6829268292682927	0.25339366515837103	73.07716446627535	39.2887734866415	4.883795817685714
987	142.0	0.4797297297297297	0.12827461607949414	98.39696961967	53.13459006678204	8.567433495120305
988	34.0	0.8717948717948718	0.37777777777777777	27.17766952966369	14.028637850806826	3.169941817064533
989	121.0	0.6914285714285714	0.1977124183006536	83.01219330881975	43.37396252297039	4.609685551914412
990	114.0	0.7402597402597403	0.17647058823529413	80.66904755831213	43.50005165400327	3.8123557575630036
991	218.0	0.43687374749499	0.0872	151.40916292848974	78.26136965438349	9.70607703676117
992	82.0	0.7256637168141593	0.3961352657004831	52.384776310850235	26.68951004572118	4.684029339603648
993	134.0	0.7403314917127072	0.14938684503901895	94.39696961966999	49.69916949474173	3.7683113136038275
994	348.0	0.24403927068723702	0.15868673050615595	219.33809511662426	58.707548966093	47.972497767595065
995	153.0	0.6566523605150214	0.12142857142857143	112.12489168102785	59.559898092748504	3.807958819852206
996	88.0	0.6821705426356589	0.13517665130568357	62.35533905932738	40.57662926104101	3.384146431262727
997	57.0	0.7808219178082192	0.296875	45.27817459305203	26.84465460123735	2.827954991805983
998	164.0	0.42597402597402595	0.29818181818181816	118.42640687119285	61.41463108635971	10.356972718234099
999	84.0	0.7706422018348624	0.22459893048128343	64.9350288425444	39.26597105499707	2.853144442173557
1000	74.0	0.6915887850467289	0.2846153846153846	56.21320343559642	30.457768361093677	3.8053468886034287
1001	69.0	0.7931034482758621	0.26136363636363635	53.04163056034261	28.062266121881414	3.25065701657128
1002	146.0	0.6460176991150443	0.4451219512195122	89.21320343559641	47.62401103367738	5.679376570727133
1003	174.0	0.6641221374045801	0.1045045045045045	113.85281374238569	64.65200784612304	4.104273152021861
1004	120.0	0.6486486486486487	0.15037593984962405	85.04772721475248	45.878723676903356	4.406490465528336
1005	116.0	0.5948717948717949	0.17496229260935142	88.5269119345812	48.40921613032859	4.386729319522428
1006	96.0	0.7384615384615385	0.15	69.01219330881975	39.74278002566039	3.565261366260176
1007	111.0	0.7115384615384616	0.24025974025974026	81.14213562373095	48.0521894915882	3.325433481311333
1008	135.0	0.574468085106383	0.20454545454545456	83.25483399593904	41.916670956245866	7.662274224324652
1009	76.0	0.7378640776699029	0.24516129032258063	59.31370849898476	35.37250139036489	2.9046712236878367
1010	187.0	0.5297450424929179	0.19318181818181818	136.5685424949238	51.222972000708296	9.745486380649185
1011	211.0	0.5861111111111111	0.1296068796068796	119.64570696119915	62.5276211900734	7.6678164487609015
1012	62.0	0.7469879518072289	0.2012987012987013	50.077164466275356	28.952176835164725	2.961840152350767
1013	56.0	0.7887323943661971	0.4057971014492754	42.071067811865476	25.53254843753266	2.9687472241615254
1014	54.0	0.84375	0.39705882352941174	38.384776310850235	19.326501344043383	3.6553409234233296
1015	101.0	0.7829457364341085	0.45089285714285715	68.72792206135786	36.357040273026946	3.7383222217316145
1016	110.0	0.6918238993710691	0.14066496163682865	76.49747468305833	45.02533410546506	3.773585807725741
1017	114.0	0.7702702702702703	0.2	83.35533905932736	43.886614921859156	3.61711607497376
1018	105.0	0.6325301204819277	0.19090909090909092	69.46194077712559	35.69003553305372	5.8150990752355165
1019	102.0	0.68	0.2809917355371901	71.42031021678297	38.92285333071853	4.249562106783473
1020	140.0	0.5511811023622047	0.125	97.43250352560274	52.52908048509698	5.382301810374264
1021	126.0	0.5550660792951542	0.21	89.76955262170047	47.402623604782654	5.716013230855131
1022	205.0	0.5352480417754569	0.20337301587301587	136.18376618407356	73.30333499174371	5.979283785778823
1023	127.0	0.5204918032786885	0.18220946915351507	88.01219330881976	47.57748616201869	6.502575359368905
1024	51.0	0.864406779661017	0.2802197802197802	33.45584412271571	19.03094940900617	3.7017577889361166
1025	132.0	0.6407766990291263	0.29931972789115646	96.76345596729058	54.90393735599604	4.215313244272427
1026	126.0	0.6847826086956522	0.23333333333333334	93.42031021678298	51.99380567218751	3.475310375208517
1027	101.0	0.8278688524590164	0.2693333333333333	60.76955262170047	30.759595868386224	4.4023672215354015
1028	198.0	0.4852941176470588	0.1182089552238806	144.36143571373725	80.77161659326588	5.817570503759092
1029	51.0	0.9622641509433962	0.35664335664335667	33.248737341529164	17.0802764802754	3.794564400128722
1030	46.0	0.8679245283018868	0.3382352941176471	36.970562748477136	19.667663660173222	3.039068312330678
1031	120.0	0.4528301886792453	0.16830294530154277	79.04772721475248	40.36644277459512	8.901639546410898
1032	72.0	0.7741935483870968	0.3076923076923077	55.76345596729059	30.207199735485272	3.2437628952722712
1033	322.0	0.40966921119592875	0.10377054463422494	228.26093065034894	123.47511098259561	8.31672914158011
1034	146.0	0.4022038567493113	0.17892156862745098	106.42640687119285	55.806835243345915	9.383343260236208
1035	77.0	0.7623762376237624	0.275	58.62741699796952	31.335870986901735	3.4037038574654837
1036	289.0	0.25965858041329737	0.16990005878894768	191.23759005323592	93.56395819474203	22.78712037446254
1037	40.0	0.7692307692307693	0.3333333333333333	31.72792206135785	18.1271555391164	3.200973611369135
1038	116.0	0.7837837837837838	0.15977961432506887	79.74011537017762	43.23405460759919	3.6139008866819524
1039	365.0	0.24398395721925134	0.09676564156945917	225.17871555019022	115.29144864960911	24.97350698336238
1040	56.0	0.7887323943661971	0.35	42.31370849898476	23.887618177857238	3.1982239703333426
1041	190.0	0.5135135135135135	0.11994949494949494	122.19595949289331	63.553418210090456	7.2227048912652405
1042	112.0	0.5544554455445545	0.18855218855218855	82.80508652763321	40.88805971347331	5.642246025686886
1043	125.0	0.5252100840336135	0.1736111111111111	80.69848480983501	47.57902327264751	6.383458656627022
1044	113.0	0.5594059405940595	0.29894179894179895	84.59188309203678	47.178420099661935	5.057840460515627
1045	66.0	0.7096774193548387	0.4125	45.55634918610404	23.578768065034474	4.9092225503256035
1046	130.0	0.6372549019607843	0.29545454545454547	87.698484809835	45.30795188368929	5.217712687672098
1047	146.0	0.6952380952380952	0.238562091503268	104.00609665440987	58.713724232117876	3.456150240486142
1048	120.0	0.6896551724137931	0.2926829268292683	82.62741699796952	45.951851905453694	3.9164291861800353
1049	99.0	0.673469387755102	0.1523076923076923	66.32590180780451	39.10636707056898	4.5553296385709645
1050	214.0	0.7353951890034365	0.13896103896103895	117.6812408671319	62.8590948184254	5.182306951775336
1051	73.0	0.73	0.292	53.79898987322333	29.15293047082756	3.715696571961468
1052	84.0	0.6511627906976745	0.41379310344827586	61.14213562373095	33.89672297186809	4.46715596616317
1053	54.0	0.8059701492537313	0.24434389140271492	34.62741699796952	23.11984550842149	3.251174765636081
1054	270.0	0.5094339622641509	0.21669341894060995	185.76955262170048	104.17814302143171	5.379537846588762
1055	77.0	0.8020833333333334	0.21388888888888888	53.59797974644666	29.1500731957531	3.902375829934955
1056	144.0	0.6050420168067226	0.11910669975186104	97.9177848998413	54.35929894923625	5.076143716593631
1057	156.0	0.8387096774193549	0.19696969696969696	84.2253967444162	43.78378800125407	4.751237111148543
1058	91.0	0.5947712418300654	0.40625	67.3492424049175	36.052273762132096	5.515674408083088
1059	71.0	0.8875	0.3169642857142857	42.90559159102154	21.932609806469717	4.208617591386843
1060	123.0	0.7321428571428571	0.3106060606060606	87.55634918610404	50.028091648262105	3.36593423605072
1061	41.0	0.803921568627451	0.5125	30.48528137423857	17.130353212548954	3.1606056887185447
1062	102.0	0.6181818181818182	0.24401913875598086	70.3492424049175	45.16410500721453	4.184040490916919
1063	354.0	0.4621409921671018	0.07260049220672682	226.04267658086914	120.27157756194502	7.697620429510955
1064	166.0	0.664	0.33535353535353535	115.17766952966367	62.83897697191692	4.140980187992946
1065	144.0	0.6180257510729614	0.18823529411764706	98.42640687119284	51.66314801461611	4.918879119044187
1066	732.0	0.33227417158420336	0.05745231928420061	362.8954903232548	180.84504443072717	13.930455925820361
1067	114.0	0.6063829787234043	0.1357142857142857	81.5685424949238	46.17776670440399	4.873197854653838
1068	79.0	0.7181818181818181	0.41798941798941797	56.55634918610404	30.425243750894502	4.111228931835847
1069	104.0	0.7482014388489209	0.24074074074074073	78.2842712474619	40.728231731824785	3.4761934733080353
1070	92.0	0.6618705035971223	0.30976430976430974	68.14213562373095	37.41466147867513	4.011727445598621
1071	136.0	0.6355140186915887	0.1642512077294686	101.01219330881976	54.49624672157578	4.0795413069340345
1072	37.0	0.8222222222222222	0.3162393162393162	29.556349186104047	16.467996412396353	3.0575409306501573
1073	275.0	0.5319148936170213	0.08384146341463415	186.99494936611663	100.49951730162431	5.256077850633612
1074	148.0	0.6788990825688074	0.16499442586399107	94.81118318204308	49.67760441011115	4.7210471563200676
1075	179.0	0.5524691358024691	0.1312316715542522	133.70458146424488	75.21254795951812	4.637578595198752
1076	156.0	0.8863636363636364	0.23388305847076463	75.9827560572969	39.1087521228824	5.280985499995768
1077	103.0	0.7103448275862069	0.1467236467236467	72.91168824543142	40.43909372953036	3.888624278234846
1078	187.0	0.5683890577507599	0.15327868852459017	132.25483399593904	70.04261057837772	5.396306482425594
1079	64.0	0.7901234567901234	0.256	50.970562748477136	29.049870340188406	2.949369969712505
1080	179.0	0.35728542914171657	0.14954051796157058	132.01219330881975	73.57622112018127	9.543897826739796
1081	38.0	0.7916666666666666	0.5588235294117647	30.82842712474619	17.85131351851931	2.7329672187302876
1082	44.0	0.8148148148148148	0.5176470588235295	31.863961030678926	18.367205156756192	3.3416217449994927
1083	133.0	0.5450819672131147	0.3181818181818182	92.36143571373725	27.224013369555735	13.747281768132085
1084	119.0	0.7828947368421053	0.16168478260869565	79.39696961966999	42.05485163312385	3.8949743886215895
1085	90.0	0.8256880733944955	0.37037037037037035	60.38477631085023	31.081703485861862	3.8022481682567952
1086	119.0	0.5748792270531401	0.20341880341880342	89.04163056034261	52.45894401257542	4.283359324013335
1087	113.0	0.5794871794871795	0.38175675675675674	78.38477631085023	42.765655589281224	5.622466806002463
1088	74.0	0.5323741007194245	0.3523809523809524	52.31370849898476	33.28795364829329	4.993181784614446
1089	98.0	0.6363636363636364	0.2784090909090909	70.07106781186548	45.77146789537094	3.605234568055194
1090	134.0	0.6473429951690821	0.16028708133971292	92.1543289325507	48.05987752111383	4.5079580396664545
1091	113.0	0.7290322580645161	0.16941529235382308	73.9827560572969	39.48896014015223	4.407742987667601
1092	219.0	0.6886792452830188	0.19623655913978494	148.51576464628795	46.6167383525954	9.77331266022463
1093	228.0	0.6745562130177515	0.12095490716180371	148.36753236814712	78.1586400386343	4.240626393725376
1094	125.0	0.6218905472636815	0.16869095816464239	89.01219330881976	48.766144514718405	4.381865946100991
1095	150.0	0.5976095617529881	0.19607843137254902	107.5269119345812	59.57952112146161	4.47747407010022
1096	104.0	0.6624203821656051	0.15294117647058825	74.25483399593904	41.44865524462932	4.154926748052854
1097	219.0	0.5918918918918918	0.1322463768115942	154.63961030678928	83.04984331767375	4.629648317950655
1098	164.0	0.4699140401146132	0.11310344827586206	127.74011537017762	72.8538151643282	4.814626516612325
1099	188.0	0.5875	0.15173527037933818	132.3259018078045	70.04826648630068	5.155436385844184
1100	87.0	0.8365384615384616	0.2761904761904762	53.35533905932738	27.35914967273432	4.309055393350864
1101	108.0	0.7605633802816901	0.16927899686520376	70.70458146424487	38.48738020183418	4.1000888327905445
1102	40.0	0.8333333333333334	0.4166666666666667	32.31370849898476	17.183335087044558	2.941597403851074
1103	101.0	0.7266187050359713	0.27297297297297296	76.79898987322333	41.5507062078973	3.496177387762392
1104	151.0	0.7626262626262627	0.2082758620689655	80.77564927611034	40.82445775041752	5.633549381047968
1105	270.0	0.5672268907563025	0.07640067911714771	173.72896808188437	93.62893758578008	6.011738852785873
1106	140.0	0.6278026905829597	0.1383399209486166	101.49747468305833	54.76573805874499	4.346668461898748
1107	151.0	0.5431654676258992	0.11651234567901235	110.77564927611034	64.29692724277942	5.001115001612511
1108	155.0	0.6378600823045267	0.1354895104895105	107.01828996322963	55.73216816014759	4.924024258201622
1109	99.0	0.792	0.21428571428571427	72.11269837220809	38.608930200393495	3.4303056561480463
1110	145.0	0.7323232323232324	0.15899122807017543	91.81118318204308	46.57573796459189	4.76140253497294
1111	273.0	0.5416666666666666	0.06475332068311196	176.9716087690037	103.03676555723908	5.509310474337069
1112	138.0	0.44660194174757284	0.13142857142857142	96.91168824543142	49.45865016368675	9.377219265129142
1113	48.0	0.8	0.26373626373626374	31.384776310850235	20.84046515673204	3.2831659595129166
1114	84.0	0.7706422018348624	0.19004524886877827	60.597979746446654	33.49760218029472	3.470182624169923
1115	108.0	0.6792452830188679	0.13810741687979539	74.25483399593904	45.16147607139092	3.56567745787097
1116	110.0	0.7189542483660131	0.21825396825396826	69.01219330881975	35.623902572427966	4.961542537672726
1117	78.0	0.6141732283464567	0.203125	59.35533905932738	31.116838772343847	4.985719677262791
1118	141.0	0.75	0.1902834008097166	92.66904755831214	48.672094349970976	4.128539249634765
1119	96.0	0.7384615384615385	0.18972332015810275	59.01219330881976	33.351817004830714	4.866450877482655
1120	43.0	0.7818181818181819	0.2606060606060606	33.798989873223334	18.266725561981133	3.3769922039416116
1121	186.0	0.6241610738255033	0.09393939393939393	129.40306627407986	74.38649585858083	4.178318413094624
1122	74.0	0.5826771653543307	0.15416666666666667	60.62741699796952	36.75497353654569	3.5539727591970163
1123	105.0	0.7094594594594594	0.5121951219512195	75.65685424949238	45.57822588838911	3.4787884180999193
1124	178.0	0.6267605633802817	0.15411255411255412	122.70458146424487	65.83306439442313	5.199157678896107
1125	47.0	0.8703703703703703	0.3560606060606061	32.62741699796952	16.120597669129076	3.9491485129116866
1126	326.0	0.5659722222222222	0.1541371158392435	182.10764773832472	66.69556776986734	13.383058721534395
1127	91.0	0.6691176470588235	0.1685185185185185	72.83452377915607	41.75408318960924	3.1987635512985864
1128	167.0	0.6254681647940075	0.12975912975912976	105.98885271170677	54.523650972453055	6.015844161310871
1129	95.0	0.4947916666666667	0.2334152334152334	75.04163056034261	43.75244122610588	6.2900006647693445
1130	160.0	0.517799352750809	0.36363636363636365	112.04163056034263	63.574162007249235	7.435030267324206
1131	144.0	0.6824644549763034	0.13610586011342155	104.1543289325507	54.867422828176636	3.9378291752987344
1132	190.0	0.5621301775147929	0.08421985815602837	129.23759005323595	75.61651482095557	4.892933953743358
1133	227.0	0.6899696048632219	0.5820512820512821	135.79898987322332	74.57039116446447	4.847668182664108
1134	89.0	0.644927536231884	0.26176470588235295	64.14213562373095	40.49130446659443	3.5452636833472133
1135	118.0	0.6519337016574586	0.3064935064935065	77.66295090390227	39.64489387983398	5.293103842875403
1136	73.0	0.7448979591836735	0.30416666666666664	50.798989873223334	27.86412924593671	3.9341720711169295
1137	43.0	0.8431372549019608	0.39090909090909093	30.17766952966369	15.378446532505226	3.812659577344788
1138	64.0	0.7111111111111111	0.24242424242424243	47.00609665440988	28.680740653345726	3.3320587593140965
1139	195.0	0.47911547911547914	0.13157894736842105	134.05382386916236	69.66455663626247	8.601762870386937
1140	34.0	0.8947368421052632	0.38636363636363635	25.556349186104043	13.629153395354129	3.21606336054745
1141	159.0	0.8688524590163934	0.17845117845117844	87.29646455628166	46.41981291996064	4.486519696436813
1142	69.0	0.8313253012048193	0.3333333333333333	49.59188309203678	25.617439488917448	3.5002471297725766
1143	287.0	0.389945652173913	0.15169133192389006	188.22539674441617	94.7773505960487	11.740662755055968
1144	283.0	0.7312661498708011	0.12993572084481175	158.26702730475878	81.84161000705191	4.820522808363361
1145	58.0	0.8787878787878788	0.26244343891402716	35.62741699796952	21.62161408863578	3.583118918190197
1146	161.0	0.6939655172413793	0.12900641025641027	122.01828996322962	64.08645070070702	3.4363745209819734
1147	121.0	0.6368421052631579	0.25473684210526315	68.59797974644665	31.920830827685023	7.983503791134065
1148	132.0	0.8407643312101911	0.25142857142857145	68.08326112068522	34.51551409922709	5.229950386785828
1149	108.0	0.526829268292683	0.23684210526315788	77.698484809835	44.320080831036094	6.280752841439927
1150	32.0	0.8205128205128205	0.36363636363636365	22.31370849898476	14.193395075510265	2.9528649191049943
1151	84.0	0.7368421052631579	0.5793103448275863	60.72792206135785	32.37419385075483	4.180996712684803
1152	123.0	0.7735849056603774	0.15185185185185185	77.01828996322963	43.201647256288936	4.018973073551645
1153	39.0	0.9069767441860465	0.30952380952380953	28.384776310850235	16.559475643966714	3.011822932459986
1154	104.0	0.7222222222222222	0.15757575757575756	70.66904755831214	41.84578628335232	3.672179741762846
1155	50.0	0.8333333333333334	0.2403846153846154	29.798989873223327	22.75619345550423	2.9662871431583264
1156	35.0	0.7	0.43209876543209874	27.31370849898476	13.296663860945554	4.490211072449373
1157	32.0	0.7804878048780488	0.4444444444444444	28.621320343559645	19.54621019015551	2.1669488231753107
1158	201.0	0.4652777777777778	0.10004977600796416	135.71677477306463	70.39543971416288	8.358197120095994
1159	286.0	0.6177105831533477	0.08706240487062405	181.96551211459382	96.90112190966522	4.9955084627455815
1160	111.0	0.6491228070175439	0.20555555555555555	79.56244584051392	41.58424027411458	4.8164641709361575
1161	294.0	0.5278276481149012	0.09898989898989899	171.9655121145938	87.59499756755565	8.126146653839188
1162	74.0	0.8505747126436781	0.29959514170040485	48.2842712474619	24.75214557455391	3.963358035061911
1163	36.0	0.9473684210526315	0.4	26.38477631085024	13.605666385470474	3.3642147631670167
1164	187.0	0.7056603773584905	0.19767441860465115	96.53300858899107	48.42279297531819	6.026296644079628
1165	179.0	0.3977777777777778	0.2193627450980392	116.74011537017762	57.784884388078524	12.107481310047373
1166	163.0	0.6442687747035574	0.12228057014253563	109.78174593052023	57.787772455673405	4.924227152339573
1167	50.0	0.7936507936507936	0.4166666666666667	39.27817459305202	22.029692863032402	3.099134130762845
1168	128.0	0.7804878048780488	0.20414673046251994	80.66904755831214	41.934265583674176	4.290340125838453
1169	231.0	0.5877862595419847	0.09041095890410959	168.2670273047588	88.61910855796857	4.566733666927099
1170	103.0	0.4577777777777778	0.24523809523809523	81.21320343559643	47.09074789442071	6.95106075142594
1171	71.0	0.797752808988764	0.32272727272727275	48.83452377915607	25.041846880258618	3.9122153225083287
1172	59.0	0.8805970149253731	0.38311688311688313	36.04163056034262	17.683469155865087	4.42452787425219
1173	153.0	0.6710526315789473	0.12878787878787878	101.81118318204308	56.71218877685574	4.039746679319207
1174	69.0	0.6634615384615384	0.3194444444444444	52.520815280171306	31.879752529457544	3.4509508719141335
1175	131.0	0.7751479289940828	0.1723684210526316	88.70458146424487	45.41327296220992	4.0474146105404705
1176	183.0	0.5903225806451613	0.12448979591836734	121.98885271170677	64.55101714166209	6.107965882422719
1177	182.0	0.5947712418300654	0.17635658914728683	107.1543289325507	53.850454263669164	7.624003927009142
1178	52.0	0.9811320754716981	0.9629629629629629	51.0	30.133232971012262	1.9941003974656994
1179	234.0	0.444022770398482	0.35240963855421686	169.90559159102153	96.97088127729347	7.4285698985713395
1180	38.0	0.76	0.31666666666666665	28.349242404917497	14.690559316730642	4.4769881215264435
1181	69.0	0.7582417582417582	0.25	52.45584412271571	28.095219729451518	3.495420522302028
1182	45.0	0.7758620689655172	0.29411764705882354	33.59188309203678	18.444213718103263	3.448186866544577
1183	46.0	0.8363636363636363	0.6052631578947368	35.03553390593274	20.603036951423444	2.934497690552928
1184	215.0	0.4479166666666667	0.22872340425531915	112.29036790187179	55.88927990479873	11.628767788972942
1185	100.0	0.5291005291005291	0.22624434389140272	67.90559159102153	32.222521803699614	8.068425410828489
1186	55.0	0.7142857142857143	0.35714285714285715	44.89949493661166	26.889822264287293	3.012690088649348
1187	156.0	0.5217391304347826	0.14857142857142858	108.25483399593904	60.47069958283219	6.668388450021941
1188	130.0	0.8024691358024691	0.5019305019305019	80.72792206135786	42.66788577655028	4.097125163070074
1189	33.0	0.7674418604651163	0.29464285714285715	26.31370849898476	17.079430591933857	2.6768284626742274
1190	243.0	0.41396933560477	0.21696428571428572	164.66904755831212	78.86111689429836	10.614083462425052
1191	113.0	0.5978835978835979	0.1877076411960133	86.07716446627535	50.968731380604325	4.045631659573846
1192	68.0	0.8292682926829268	0.2956521739130435	51.62741699796952	26.554463120299452	3.3201081534253762
1193	78.0	0.6964285714285714	0.23214285714285715	50.87005768508881	28.74336355410705	4.5758116497396335
1194	111.0	0.7449664429530202	0.3333333333333333	76.59188309203678	39.47825230905859	4.008049620416102
1195	100.0	0.5524861878453039	0.1736111111111111	71.07716446627535	43.689630300483415	5.542725341118897
1196	125.0	0.5813953488372093	0.37202380952380953	91.59188309203678	55.30054873896638	4.573729896835241
1197	174.0	0.46648793565683644	0.1843220338983051	122.01219330881975	67.86614614917382	7.603249749500961
1198	332.0	0.36403508771929827	0.1111111111111111	196.48023074035518	99.11134761117107	14.493044451696791
1199	88.0	0.8148148148148148	0.2222222222222222	56.59797974644666	29.269664254655716	4.167165321465379
1200	414.0	0.21962864721485412	0.05689939527212754	279.5512985522207	152.2896865717526	20.841372020923977
1201	160.0	0.7017543859649122	0.3155818540433925	87.698484809835	44.8989943656477	6.056736328546586
1202	138.0	0.5702479338842975	0.3317307692307692	104.14213562373095	61.61141644486461	4.104977341932315
1203	41.0	0.8367346938775511	0.5857142857142857	29.863961030678926	15.778802519054649	3.4692844779072916
1204	166.0	0.6747967479674797	0.15689981096408318	102.49747468305833	57.19199669248192	4.6571714982076395
1205	88.0	0.8888888888888888	0.704	51.89949493661166	26.49955130658832	4.425814064810021
1206	140.0	0.660377358490566	0.1414141414141414	93.29646455628166	48.91406771178427	5.078335366147528
1207	52.0	0.7878787878787878	0.4126984126984127	37.31370849898477	21.686628477233405	3.6799750401824873
1208	90.0	0.6164383561643836	0.3629032258064516	64.17766952966369	34.664532672522824	5.228582583278722
1209	70.0	0.660377358490566	0.28225806451612906	54.69238815542512	36.22175151430076	2.891405789634474
1210	62.0	0.8051948051948052	0.6458333333333334	47.82842712474619	26.281782249161143	3.202248308959837
1211	171.0	0.4763231197771588	0.2181122448979592	111.25483399593904	57.27563596842277	8.986293183555546
1212	98.0	0.7967479674796748	0.19878296146044624	69.84062043356595	35.640700121838925	3.6715940834144156
1213	69.0	0.7582417582417582	0.3194444444444444	51.14213562373095	30.85461041477058	3.133879944785437
1214	120.0	0.6976744186046512	0.4181184668989547	84.55634918610403	45.749049241860654	3.810080798097518
1215	133.0	0.7430167597765364	0.16419753086419753	82.46803743153548	43.96942526134523	4.57247391494289
1216	112.0	0.6666666666666666	0.24615384615384617	79.11269837220809	41.53906476140822	4.461968172457536
1217	90.0	0.6976744186046512	0.2777777777777778	63.73401871576773	30.07296983517433	5.0631265760193465
1218	197.0	0.5324324324324324	0.2269585253456221	135.35533905932738	73.48642228862315	5.23219122576662
1219	169.0	0.5487012987012987	0.20812807881773399	121.31980515339464	68.25110706749818	4.390615938709875
1220	41.0	0.8541666666666666	0.3153846153846154	30.00609665440988	17.063673173411654	3.26656381410709
1221	327.0	0.23712835387962292	0.0680966264056643	230.45079348883237	123.8579615734174	18.302231205613268
1222	349.0	0.4943342776203966	0.12367115520907158	192.92388155425118	100.40675795678371	8.302689962707678
1223	32.0	0.8421052631578947	0.3516483516483517	26.899494936611667	15.205784637266209	2.7391355506945887
1224	47.0	0.746031746031746	0.41228070175438597	34.071067811865476	22.669313790291675	2.9383115010805394
1225	43.0	0.7166666666666667	0.48863636363636365	39.621320343559645	25.29231267426054	2.419577433749598
1226	78.0	0.7878787878787878	0.4727272727272727	56.242640687119284	34.80286072772932	2.891565000333674
1227	92.0	0.8363636363636363	0.71875	65.27817459305203	34.824783940853486	3.6741085662276007
1228	79.0	0.8681318681318682	0.2309941520467836	51.21930009000631	26.3461006715164	3.944488923257942
1229	110.0	0.6285714285714286	0.21825396825396826	70.18376618407356	35.0709796260455	5.78587118979275
1230	129.0	0.6825396825396826	0.1600496277915633	85.36143571373725	42.71890535682075	5.166199825606517
1231	234.0	0.4785276073619632	0.11665004985044865	150.95331880577405	76.6227099455877	8.245191669602544
1232	144.0	0.4298507462686567	0.1978021978021978	105.698484809835	63.07624179424341	7.789004128363988
1233	100.0	0.6944444444444444	0.42016806722689076	69.72792206135786	39.19465651675123	4.042338498182781
1234	160.0	0.5734767025089605	0.42328042328042326	108.38477631085024	61.832050432599296	6.009682961729212
1235	74.0	0.8131868131868132	0.24342105263157895	49.941125496954285	25.711097343707355	3.9912375774859368
1236	130.0	0.6403940886699507	0.5416666666666666	94.5208152801713	55.72345652833079	4.1454404541493535
1237	57.0	0.8382352941176471	0.34545454545454546	38.62741699796952	19.70120288319721	4.010359142926689
1238	154.0	0.6497890295358649	0.11407407407407408	101.60407640085654	58.57366506451664	4.086405198191817
1239	87.0	0.6744186046511628	0.2013888888888889	69.17766952966369	40.75241158035192	2.9836112321737573
1240	32.0	0.8888888888888888	0.6153846153846154	24.449747468305834	13.62672736289453	2.947422836537291
1241	74.0	0.6981132075471698	0.2276923076923077	56.698484809835	29.524878959061112	3.7003745134398467
1242	152.0	0.3645083932853717	0.15019762845849802	109.66904755831213	55.45496068740406	11.810312643743114
1243	46.0	0.8214285714285714	0.45098039215686275	33.69238815542512	19.485251051167516	3.150875441467712
1244	265.0	0.3807471264367816	0.25	195.24873734152916	121.78797737780108	7.109707925554293
1245	138.0	0.5609756097560976	0.13911290322580644	95.63961030678927	49.84297808644299	7.376751037498752
1246	159.0	0.6162790697674418	0.45689655172413796	116.9350288425444	64.16931181885747	4.893694706120293
1247	97.0	0.6736111111111112	0.17290552584670232	72.56244584051392	40.95935975966554	3.8511323091477117
1248	472.0	0.20848056537102475	0.0783142525302804	321.93607486307087	170.70070606749388	27.213483307224788
1249	157.0	0.5880149812734082	0.1590678824721378	109.32590180780453	56.45733365311962	5.443415971760023
1250	154.0	0.5133333333333333	0.3793103448275862	106.76345596729058	66.34618198362885	5.99096614989907
1251	58.0	0.6987951807228916	0.24786324786324787	43.62741699796952	22.679017843241958	4.2744530310513635
1252	73.0	0.6293103448275862	0.20221606648199447	54.31980515339464	28.77757140240514	5.354956005169841
1253	260.0	0.5241935483870968	0.15151515151515152	153.63961030678928	79.44244469983339	6.628412323958044
1254	113.0	0.5736040609137056	0.22287968441814596	83.4558441227157	47.094181613312124	4.573302560690436
1255	60.0	0.759493670886076	0.35714285714285715	47.520815280171306	26.366022008860288	3.4726862937734344
1256	70.0	0.6306306306306306	0.3333333333333333	55.89949493661167	34.11514566781797	3.6126901252545434
1257	215.0	0.5842391304347826	0.2986111111111111	146.42031021678298	82.21587913967109	5.028566463378061
1258	162.0	0.5491525423728814	0.39705882352941174	107.4558441227157	55.29935286787986	7.356005776497233
1259	37.0	0.8809523809523809	0.37755102040816324	29.556349186104043	15.363418828212977	3.062125241696658
1260	34.0	0.8717948717948718	0.6071428571428571	27.449747468305834	15.058768832011127	2.9343898673843616
1261	59.0	0.7468354430379747	0.44696969696969696	41.89949493661167	24.31323931296954	3.304342285048445
1262	87.0	0.6397058823529411	0.34523809523809523	66.89949493661166	40.97564108024578	3.390026548137906
1263	53.0	0.9298245614035088	0.42063492063492064	34.97056274847714	17.31152105820204	3.9677531329610556
1264	133.0	0.6785714285714286	0.11822222222222223	105.18986283848344	58.29909009230827	3.632003073035806
1265	47.0	0.8867924528301887	0.42727272727272725	29.79898987322333	14.410656256740976	4.251038625059211
1266	35.0	0.8536585365853658	0.5384615384615384	27.071067811865472	14.293399924548632	3.2125938761754047
1267	87.0	0.6904761904761905	0.453125	53.798989873223334	26.614629708522834	5.639940513678598
1268	150.0	0.6198347107438017	0.09566326530612244	93.39696961966999	64.90436656753462	3.927238274805029
1269	232.0	0.5395348837209303	0.09690893901420217	149.2020561473032	77.80129247127061	6.659006071245591
1270	127.0	0.6614583333333334	0.42333333333333334	92.31370849898475	54.51854727127059	3.8897396100993036
1271	110.0	0.7857142857142857	0.20220588235294118	74.42640687119285	38.3421996712647	3.968223626389256
1272	35.0	0.8333333333333334	0.5833333333333334	26.656854249492376	13.962903464067836	3.318559485259241
1273	111.0	0.4826086956521739	0.25227272727272726	84.83452377915607	44.99813475884221	5.933670815501875
1274	140.0	0.5303030303030303	0.2074074074074074	96.14823227814081	53.70389499176985	6.292093310112447
1275	52.0	0.9122807017543859	0.8253968253968254	40.41421356237309	23.03846481782167	2.855208531976274
1276	225.0	0.42775665399239543	0.12362637362637363	157.817279836453	65.9849191352256	13.03771423205586
1277	326.0	0.19878048780487806	0.11811594202898551	230.68733752154176	114.00084915092738	27.29882123578385
1278	127.0	0.538135593220339	0.25918367346938775	90.55634918610406	54.75581433195887	4.775764531287964
1279	191.0	0.4170305676855895	0.16608695652173913	116.8761543394987	58.62724634850308	10.684118617119942
1280	217.0	0.5154394299287411	0.12273755656108597	154.67514421272202	80.52760212232324	6.391083905134292
1281	146.0	0.6697247706422018	0.33181818181818185	104.89949493661166	61.66104373893486	3.7363044586225147
1282	122.0	0.5781990521327014	0.37888198757763975	88.76345596729058	51.41825512146011	4.927059279943254
1283	79.0	0.79	0.2020460358056266	59.597979746446654	31.097014136590015	3.6017366886095123
1284	159.0	0.6385542168674698	0.1780515117581187	105.46194077712559	56.86268034970417	4.633586431730724
1285	228.0	0.3486238532110092	0.0975609756097561	156.43860018001263	78.32842735344047	12.653077643252905
1286	150.0	0.5190311418685121	0.11574074074074074	99.8467170879758	53.903464111809505	7.248002105728414
1287	117.0	0.5969387755102041	0.37987012987012986	86.9350288425444	50.30385248225467	4.734305859976985
1288	106.0	0.6666666666666666	0.14421768707482993	76.97665940288701	43.326194808786504	3.9826934739024904
1289	155.0	0.3924050632911392	0.22142857142857142	112.35533905932736	58.9068133388411	9.636943090402454
1290	72.0	0.7128712871287128	0.41379310344827586	58.071067811865476	32.90745095133761	3.2746188595671795
1291	131.0	0.48880597014925375	0.33418367346938777	91.76345596729058	54.89849212528119	6.62289128664827
1292	133.0	0.4117647058823529	0.16299019607843138	96.698484809835	56.02240752721513	7.140110443495866
1293	139.0	0.35279187817258884	0.2106060606060606	99.70458146424487	49.28800154097108	14.252881833152092
1294	126.0	0.6737967914438503	0.2571428571428571	92.5208152801713	56.19964044439756	3.5011441404654793
1295	323.0	0.24846153846153846	0.14953703703703702	208.82337649086284	105.30960939990592	23.276659833727
1296	198.0	0.35611510791366907	0.12313432835820895	146.8111831820431	81.26229514311525	10.36742818825472
1297	183.0	0.7233201581027668	0.13958810068649885	129.36143571373725	67.54242991541297	3.775355917724694
1298	95.0	0.7723577235772358	0.1532258064516129	70.66904755831214	39.91056849900623	3.189757879076147
1299	125.0	0.6793478260869565	0.3799392097264438	91.27817459305203	52.524331848181205	3.823439799727129
1300	360.0	0.34782608695652173	0.06593406593406594	241.90663761154806	122.3371733670266	10.49896351019006
1301	96.0	0.7218045112781954	0.41025641025641024	71.65685424949238	43.12738780252193	3.1664941528087143
1302	207.0	0.8149606299212598	0.14516129032258066	116.02438661763951	60.2285644188687	4.601222131864275
1303	105.0	0.7394366197183099	0.23076923076923078	77.87005768508881	40.261149267621704	3.6633188506815033
1304	85.0	0.7083333333333334	0.4857142857142857	62.27817459305202	38.29653497167649	3.130502490233855
1305	54.0	0.7397260273972602	0.21176470588235294	38.62741699796952	24.210889846298212	3.333358141461583
1306	198.0	0.43805309734513276	0.3013698630136986	142.90559159102153	83.39210232335589	6.754933005010979
1307	159.0	0.3803827751196172	0.12905844155844157	109.5685424949238	57.61370821718559	11.469996826395782
1308	105.0	0.7191780821917808	0.375	75.31370849898477	44.845307113605806	3.342696909703427
1309	185.0	0.4907161803713528	0.21561771561771562	132.2842712474619	74.5581832098645	7.099697326454148
1310	102.0	0.6845637583892618	0.15454545454545454	75.04772721475248	42.62925709874759	3.4773661732137904
1311	139.0	0.7091836734693877	0.25272727272727274	104.62741699796953	55.53417489253578	3.6068261241341695
1312	151.0	0.5592592592592592	0.2054421768707483	103.52691193458118	56.813527436331135	6.209091932146475
1313	118.0	0.6982248520710059	0.3933333333333333	92.86396103067892	57.350424860462745	2.916389340370881
1314	113.0	0.743421052631579	0.20772058823529413	79.59797974644665	41.303913714973795	3.8968242852655095
1315	160.0	0.4155844155844156	0.12260536398467432	117.22539674441619	60.18171668660043	9.77572128560132
1316	73.0	0.8021978021978022	0.17892156862745098	48.11269837220809	31.507267881398164	3.1315513273866857
1317	94.0	0.6666666666666666	0.29012345679012347	69.97056274847714	37.32907778656619	4.123641007976098
1318	97.0	0.7293233082706767	0.3368055555555556	73.10660171779821	40.09191060734455	3.5351290312391317
1319	227.0	0.531615925058548	0.07937062937062937	153.7228714274745	85.00559794255663	6.1058473335460945
1320	190.0	0.2679830747531735	0.17399267399267399	130.26702730475878	49.78047377164232	28.1451077516255
1321	70.0	0.7865168539325843	0.2916666666666667	53.42031021678297	27.7854486217476	3.36292328956367
1322	112.0	0.7832167832167832	0.6666666666666666	80.27817459305203	47.361340329509545	3.403797901103466
1323	154.0	0.6470588235294118	0.2619047619047619	93.35533905932738	48.46450422014028	5.491285728961374
1324	95.0	0.811965811965812	0.20474137931034483	67.76955262170047	35.10612529140197	3.560022758106629
1325	136.0	0.49097472924187724	0.19318181818181818	94.76955262170047	52.75854266640581	7.064202554001259
1326	99.0	0.6827586206896552	0.11199095022624435	46.248737341529164	47.3148988111602	3.2354898495910027
1327	176.0	0.5269461077844312	0.09331919406150584	129.58073580374358	70.47200095880316	6.635567688479822
1328	126.0	0.586046511627907	0.1206896551724138	96.88225099390857	51.51445799649933	5.269563727882049
1329	155.0	0.5516014234875445	0.11742424242424243	110.36753236814714	58.39482903790287	5.90499073831001
1330	181.0	0.3290909090909091	0.15766550522648085	117.92388155425118	47.18641492727733	22.20964612604602
1331	81.0	0.7641509433962265	0.28125	58.935028842544405	36.30724568727819	2.973239316003876
1332	94.0	0.752	0.4351851851851852	70.07106781186548	41.44461191445211	3.0557082415631576
1333	151.0	0.592156862745098	0.2111888111888112	111.83452377915606	63.46002705273557	4.393030573230141
1334	103.0	0.7518248175182481	0.24641148325358853	78.79898987322333	42.99024384207681	3.269917542524127
1335	193.0	0.561046511627907	0.5012987012987012	144.1066017177982	87.74247369293212	4.293516987705072
1336	106.0	0.5638297872340425	0.1962962962962963	79.31980515339464	43.4326100527089	4.863459656448923
1337	130.0	0.5676855895196506	0.24390243902439024	90.698484809835	48.134488682221146	6.141968769556907
1338	135.0	0.6	0.39473684210526316	84.8700576850888	43.25356432796271	6.677600813541405
1339	94.0	0.7230769230769231	0.27485380116959063	74.10660171779821	42.75115416065855	2.9769332623055216
1340	115.0	0.4339622641509434	0.28255528255528256	80.35533905932738	44.204187975993385	9.191195948481441
1341	222.0	0.42447418738049714	0.16444444444444445	178.35533905932738	102.71276192885708	7.78453900089392
1342	163.0	0.7581395348837209	0.12348484848484849	111.19595949289334	59.09279112800232	3.750312685437814
1343	160.0	0.7881773399014779	0.16016016016016016	94.71067811865476	50.26184773976809	4.411962350742319
1344	146.0	0.3640897755610973	0.2246153846153846	108.59797974644667	58.97543301829849	10.235544959573224
1345	108.0	0.7012987012987013	0.3673469387755102	77.69238815542512	48.0013963278434	3.3963746448520764
1346	157.0	0.46726190476190477	0.21448087431693988	116.04163056034261	71.68727066950485	5.504335864355333
1347	41.0	0.8367346938775511	0.2867132867132867	28.384776310850235	17.68802047815998	3.003085757792279
1348	101.0	0.7062937062937062	0.14962962962962964	75.9827560572969	41.061983925146734	3.991651050779517
1349	106.0	0.7737226277372263	0.5578947368421052	74.48528137423857	43.3204340542225	3.3105568828499674
1350	141.0	0.4895833333333333	0.14656964656964658	94.39696961966999	48.596299772017105	8.018085447324419
1351	151.0	0.7475247524752475	0.16324324324324324	93.05382386916237	48.505384247358755	4.5257270573223956
1352	135.0	0.7627118644067796	0.17419354838709677	80.22539674441617	41.71856246594242	4.812222503023622
1353	140.0	0.6140350877192983	0.14492753623188406	101.77564927611034	53.716023475113	4.663913306144506
1354	141.0	0.618421052631579	0.18850267379679145	99.01219330881975	52.46786833036979	4.467883846578369
1355	180.0	0.5863192182410424	0.2727272727272727	128.14213562373095	75.47133262266165	4.1031666857348865
1356	124.0	0.5688073394495413	0.22794117647058823	78.76955262170047	40.47687440495311	6.712650977870765
1357	156.0	0.49523809523809526	0.20689655172413793	111.00609665440987	67.11640586038894	6.01271094577215
1358	242.0	0.3960720130932897	0.10503472222222222	166.98885271170676	88.39211542956332	9.36692759250268
1359	197.0	0.3724007561436673	0.13364993215739485	144.05382386916236	79.00133357081445	11.300132828233172
1360	103.0	0.5786516853932584	0.22294372294372294	73.5269119345812	39.23827938433633	5.7939286581655915
1361	96.0	0.7441860465116279	0.1947261663286004	71.2193000900063	36.44048900004786	3.8683362478305425
1362	134.0	0.39880952380952384	0.2012012012012012	93.39696961966999	44.94755780425414	11.877726214390124
1363	230.0	0.23493360572012256	0.14935064935064934	162.50966799187808	83.23954140035391	22.724451052228254
1364	133.0	0.44333333333333336	0.10262345679012345	102.84062043356595	62.063998185158255	7.127738755864524
1365	118.0	0.4957983193277311	0.22180451127819548	81.11269837220809	44.668670425314126	7.986686364150643
1366	175.0	0.6679389312977099	0.15611061552185548	130.42640687119285	68.78678658119675	3.5999637181042994
1367	151.0	0.7330097087378641	0.11160384331116038	102.16042558696059	56.63008315983148	4.116675654567263
1368	149.0	0.5643939393939394	0.3040816326530612	106.45584412271572	56.147519731196944	5.3711543087354965
1369	185.0	0.5538922155688623	0.13290229885057472	129.39696961967	68.4401280043041	6.260715869265155
1370	84.0	0.7058823529411765	0.2545454545454545	65.55634918610406	37.21234272344938	3.375422413592938
1371	184.0	0.71875	0.16355555555555557	107.88225099390857	55.73730914422607	4.90016654011863
1372	146.0	0.3659147869674185	0.26071428571428573	98.5685424949238	47.53408647853036	13.846957972595698
1373	136.0	0.5964912280701754	0.12903225806451613	96.05382386916237	49.97500185699563	5.36069759141839
1374	117.0	0.78	0.13386727688787187	89.1543289325507	48.19318664554959	3.208010562717844
1375	60.0	0.6	0.26666666666666666	46.10660171779821	28.400714710804536	4.032019555169379
1376	84.0	0.631578947368421	0.18181818181818182	67.4558441227157	38.459889965738554	3.442121684624718
1377	137.0	0.545816733067729	0.15021929824561403	103.42640687119285	55.46599389187399	5.3797798124610505
1378	102.0	0.5483870967741935	0.17229729729729729	77.5269119345812	44.11671171615654	4.9983718558892205
1379	96.0	0.6713286713286714	0.15384615384615385	67.63351365237939	37.326137076614266	4.050134338515715
1380	168.0	0.34355828220858897	0.1696969696969697	118.78174593052022	56.42978236834337	14.423500671195333
1381	176.0	0.5659163987138264	0.13203300825206302	111.19595949289332	57.55958941087028	6.9186961874816895
1382	182.0	0.5368731563421829	0.104	125.64570696119915	66.9004032908774	6.441236169922467
1383	111.0	0.8102189781021898	0.13703703703703704	79.05382386916237	43.64831756579387	3.5919982953348892
1384	141.0	0.6380090497737556	0.13988095238095238	94.71067811865476	49.66763372521227	5.38417552598333
1385	126.0	0.65625	0.42857142857142855	91.48528137423857	53.458035994805776	4.511404889099271
1386	210.0	0.41338582677165353	0.24793388429752067	150.83452377915606	85.71878620212694	9.106942629235949
1387	129.0	0.581081081081081	0.15087719298245614	97.01219330881976	54.824359083814166	4.45448564343893
1388	117.0	0.65	0.1875	87.31980515339464	47.11811063147309	4.11305009600591
1389	108.0	0.4675324675324675	0.3076923076923077	76.83452377915607	43.76657829017395	7.419688842560499
1390	105.0	0.875	0.16153846153846155	71.39696961966999	38.84055632221313	3.6911158893248426
1391	102.0	0.7034482758620689	0.23076923076923078	74.45584412271572	40.60257262582426	3.794625852588027
1392	199.0	0.32045088566827695	0.09880834160873883	145.36753236814715	74.9079591924601	14.209441496288287
1393	105.0	0.5865921787709497	0.22435897435897437	77.66295090390226	42.36549597065222	5.520042899256303
1394	105.0	0.7954545454545454	0.15789473684210525	80.18376618407356	43.583174210446	3.2402353754626567
1395	32.0	0.9142857142857143	0.4444444444444444	22.14213562373095	11.69462755310229	3.468798263696053
1396	170.0	0.35864978902953587	0.13343799058084774	119.95331880577405	60.532580678916624	12.965513141473831
1397	144.0	0.5538461538461539	0.16666666666666666	107.04163056034261	65.23379134792427	4.2928123625917065
1398	143.0	0.7222222222222222	0.14666666666666667	97.63961030678928	51.24404972983624	4.280580685214636
1399	109.0	0.7218543046357616	0.15138888888888888	78.42640687119285	44.93794003654618	3.600743166168489
1400	213.0	0.47019867549668876	0.09391534391534391	148.8528137423857	83.07631762965416	7.076510263606641
1401	152.0	0.38287153652392947	0.17715617715617715	100.95331880577403	49.44784527250981	13.382760217388753
1402	109.0	0.6264367816091954	0.3707482993197279	80.89949493661166	48.21941701100908	4.1161307459762275
1403	90.0	0.743801652892562	0.5921052631578947	70.44974746830583	43.25066676408824	3.289950619549921
1404	131.0	0.6064814814814815	0.13477366255144033	88.43250352560274	48.184452963521565	5.59579990802087
1405	107.0	0.8359375	0.21703853955375255	70.42640687119284	36.44155963717233	3.8364885495206464
1406	109.0	0.5265700483091788	0.2678132678132678	77.45584412271572	41.771246022252775	6.421229776598736
1407	122.0	0.6971428571428572	0.11776061776061776	91.05382386916237	52.21898461606802	3.480742102031302
1408	127.0	0.7696969696969697	0.13065843621399176	90.71067811865476	48.01552288465177	3.9659466148478186
1409	113.0	0.7635135135135135	0.15188172043010753	78.39696961967	42.38475554109806	3.811627431068277
1410	296.0	0.5016949152542373	0.07789473684210527	190.35028842544406	100.26494094965716	6.763824562831949
1411	91.0	0.674074074074074	0.37916666666666665	74.27817459305203	44.14139596166834	3.0607747980555735
1412	80.0	0.7339449541284404	0.24242424242424243	54.148232278140824	28.97344778578062	4.180529081903877
1413	70.0	0.7070707070707071	0.22727272727272727	55.9350288425444	34.39501932612265	2.9565204045614157
1414	163.0	0.5224358974358975	0.1257716049382716	114.39696961966999	59.31936940971508	6.012484648038378
1415	139.0	0.6069868995633187	0.11972437553832903	99.81118318204308	54.40701537411213	4.629792923740141
1416	115.0	0.6927710843373494	0.14285714285714285	83.36143571373725	46.05224187826074	3.5659936892595923
1417	88.0	0.5176470588235295	0.16698292220113853	63.14823227814083	37.98960043217617	5.489562853808529
1418	115.0	0.5665024630541872	0.14743589743589744	77.94112549695427	48.33330513664569	4.617895679162454
1419	49.0	0.7424242424242424	0.28	39.44974746830583	27.22816718470817	2.3428727102124873
1420	97.0	0.751937984496124	0.16724137931034483	71.49747468305833	38.646950139355575	3.5169332345324946
1421	187.0	0.5109289617486339	0.10625	126.50966799187808	66.69129243424788	6.667054376036062
1422	178.0	0.5281899109792285	0.1535806729939603	126.56244584051392	72.78513828784541	4.774759884922982
1423	153.0	0.6923076923076923	0.1390909090909091	113.29036790187178	62.76161837609492	3.80699441034591
1424	164.0	0.32093933463796476	0.17672413793103448	112.29646455628166	45.495103161894136	19.38240037577088
1425	166.0	0.43005181347150256	0.16550348953140578	119.69848480983501	69.70273225433465	6.57524622947085
1426	111.0	0.4111111111111111	0.21764705882352942	77.83452377915607	37.968082831525294	10.399185213953018
1427	124.0	0.6424870466321243	0.13149522799575822	90.29036790187178	51.912473746843695	3.8293952831439086
1428	124.0	0.5767441860465117	0.26956521739130435	93.62741699796952	51.319501686987735	4.7076559384528
1429	157.0	0.7302325581395349	0.1367595818815331	102.12489168102785	53.92747321393345	4.245438280446946
1430	104.0	0.7222222222222222	0.15757575757575756	77.25483399593904	42.111896531694796	3.8529945436681294
1431	134.0	0.6733668341708543	0.14316239316239315	94.81118318204308	50.43278478936632	4.484027899569586
1432	257.0	0.2943871706758305	0.13145780051150896	180.63961030678928	101.01735590611293	16.679137253237386
1433	478.0	0.20541469703480877	0.049308850835568394	323.26807332528534	171.51180607518032	21.608210160169985
1434	132.0	0.5689655172413793	0.18513323983169705	81.49747468305833	41.37771360311364	7.555765480853781
1435	182.0	0.5852090032154341	0.22413793103448276	124.76955262170048	66.26724043540871	4.955522621542418
1436	102.0	0.7132867132867133	0.4857142857142857	78.86396103067892	46.8823969473236	3.336346255864123
1437	77.0	0.8369565217391305	0.1859903381642512	55.840620433565945	30.8783070964866	3.245746971845221
1438	197.0	0.5612535612535613	0.28885630498533726	132.5269119345812	71.54239087547262	5.568645728984277
1439	100.0	0.6802721088435374	0.16420361247947454	72.32590180780453	38.90114474901003	4.321867329820475
1440	64.0	0.7619047619047619	0.45714285714285713	51.86396103067893	31.76030662077146	2.709523409122112
1441	111.0	0.5663265306122449	0.17647058823529413	80.97665940288701	44.63903392982361	4.94417568160255
1442	130.0	0.34120734908136485	0.21241830065359477	90.49137802864846	43.830099542380424	13.684760500754535
1443	144.0	0.5950413223140496	0.10666666666666667	109.12489168102785	59.541377447273774	4.426037028770005
1444	63.0	0.9692307692307692	0.20588235294117646	44.390872965260115	26.018362147001387	3.096700305135483
1445	109.0	0.7171052631578947	0.13762626262626262	81.91168824543142	45.833709333215566	3.8012198585300636
1446	103.0	0.533678756476684	0.16427432216905902	74.42640687119285	42.24932811242876	5.707765697048969
1447	206.0	0.515	0.09648711943793911	147.6812408671319	77.08855287162483	6.257515917697525
1448	139.0	0.476027397260274	0.26325757575757575	97.24873734152916	54.576116450143694	7.656066984777774
1449	69.0	0.8117647058823529	0.22115384615384615	52.698484809834994	28.932638356146718	3.211592441639645
1450	212.0	0.4918793503480278	0.10707070707070707	151.95331880577402	82.75714790721044	6.250548056336501
1451	80.0	0.898876404494382	0.18140589569160998	50.42640687119285	31.158738279925466	3.359022000985914
1452	129.0	0.30641330166270786	0.172	93.42031021678298	43.472026363694724	18.78189798868302
1453	219.0	0.7821428571428571	0.0876	143.62236636408616	78.80759181093813	3.961190574554918
1454	158.0	0.5249169435215947	0.16024340770791076	117.1126983722081	67.09780266566622	5.487360315603417
1455	137.0	0.6884422110552764	0.17586649550706032	96.25483399593905	51.58789331064593	3.9017366680772523
1456	166.0	0.5424836601307189	0.1451048951048951	119.32590180780451	63.1164268260625	5.692583068090955
1457	171.0	0.5119760479041916	0.16964285714285715	121.42640687119284	67.42413775096355	6.136981389433091
1458	70.0	0.8641975308641975	0.2777777777777778	45.35533905932738	22.931621945550226	3.977731463965432
1459	141.0	0.7966101694915254	0.146875	86.46803743153546	46.29391977726765	4.389996144547614
1460	144.0	0.676056338028169	0.15157894736842106	95.84671708797582	49.692283632367186	4.687480356410037
1461	101.0	0.6011904761904762	0.22197802197802197	71.49137802864844	40.26363713111018	5.183563057799866
1462	78.0	0.7358490566037735	0.30952380952380953	56.970562748477136	31.65012091303638	3.5015199156130663
1463	43.0	0.8958333333333334	0.23626373626373626	31.62741699796952	19.839487446846057	2.882207993787086
1464	94.0	0.8545454545454545	0.14506172839506173	62.32590180780451	39.252026755780705	3.1204850262946944
1465	109.0	0.7841726618705036	0.13974358974358975	77.81118318204308	43.27488188143147	3.5917906964666253
1466	167.0	0.6094890510948905	0.14057239057239057	108.12489168102786	56.61498114325204	5.86637177792499
1467	140.0	0.5511811023622047	0.23809523809523808	101.8700576850888	56.22349316949148	5.700809063932016
1468	159.0	0.6625	0.0950956937799043	109.2670273047588	63.61493548760044	3.9786817099049547
1469	132.0	0.6285714285714286	0.12301957129543337	89.81118318204308	52.36723301304894	4.335959708503849
1470	199.0	0.5392953929539296	0.36580882352941174	137.5918830920368	78.5283357180686	6.352563158235263
1471	122.0	0.5781990521327014	0.18914728682170542	91.90559159102155	50.652695313549835	4.496912442399861
1472	160.0	0.47904191616766467	0.1523809523809524	107.49747468305833	58.46168269584993	8.435588679503027
1473	130.0	0.5508474576271186	0.3140096618357488	95.83452377915606	53.28438963872002	5.717478506652822
1474	138.0	0.6865671641791045	0.46	96.5208152801713	54.241511872536336	4.306367401822506
1475	131.0	0.808641975308642	0.13760504201680673	88.71067811865476	48.10563846260017	3.7890731745930113
1476	116.0	0.4128113879003559	0.17682926829268292	88.35533905932738	48.34318659751436	8.500362751708359
1477	113.0	0.7687074829931972	0.13950617283950617	80.84671708797582	43.6610742242219	3.591466428308125
1478	209.0	0.3973384030418251	0.07766629505759941	142.57463914933368	91.35565358950343	8.613780337740542
1479	173.0	0.5440251572327044	0.18172268907563024	120.97665940288702	67.27549904177366	5.2474673161208285
1480	131.0	0.43521594684385384	0.14070891514500536	94.14823227814082	59.42100116047226	6.803676130230535
1481	84.0	0.8842105263157894	0.20095693779904306	55.254833995939045	30.454660231133865	3.5617419624532842
1482	141.0	0.5381679389312977	0.11058823529411765	108.46194077712559	64.56487223081712	5.115179483938197
1483	132.0	0.6700507614213198	0.1746031746031746	93.2193000900063	50.383199483172284	3.9329394109284386
1484	155.0	0.5308219178082192	0.34444444444444444	108.94112549695429	57.08409302884158	6.596561750238999
1485	154.0	0.5185185185185185	0.1437908496732026	111.91168824543142	61.7851931164254	6.389288156732318
1486	102.0	0.6938775510204082	0.22767857142857142	74.52691193458118	39.54184407374857	3.82202672383749
1487	100.0	0.8928571428571429	0.22321428571428573	68.18376618407356	35.31797323155605	3.758186639203829
1488	172.0	0.6564885496183206	0.11405835543766578	122.15432893255071	71.70400611156214	3.5316810358063666
1489	111.0	0.5751295336787565	0.22469635627530365	81.2842712474619	44.73264338105528	5.433645312303569
1490	124.0	0.6326530612244898	0.1445221445221445	89.70458146424487	48.26409385083747	4.657547577875568
1491	226.0	0.6996904024767802	0.08705701078582434	150.55129855222071	80.31405207546429	4.337869113951926
1492	112.0	0.7133757961783439	0.14854111405835543	76.81118318204308	42.98739796686255	4.053304738591482
1493	135.0	0.47368421052631576	0.2755102040816326	97.83452377915606	56.860526955301495	7.360848661745821
1494	107.0	0.5846994535519126	0.25476190476190474	82.17766952966369	47.21358393574372	4.381896124674286
1495	144.0	0.5034965034965035	0.16842105263157894	97.8050865276332	54.26126219654313	7.270627880470264
1496	148.0	0.49169435215946844	0.09743252139565503	110.67514421272202	64.03589465609292	6.055160599156034
1497	114.0	0.8382352941176471	0.14074074074074075	77.05382386916239	43.02420871171014	3.517919781797641
1498	239.0	0.5031578947368421	0.08964741185296324	159.72287142747456	85.03869635475735	6.7024610874086665
1499	113.0	0.7687074829931972	0.18585526315789475	78.08326112068522	40.75709038978796	3.757572715667454
1500	159.0	0.6794871794871795	0.13054187192118227	106.36753236814712	56.68504551742169	4.65728576582992
1501	109.0	0.6606060606060606	0.1321212121212121	78.98275605729691	45.749616758786885	4.162237418181642
1502	121.0	0.6402116402116402	0.12927350427350429	80.46194077712559	50.75461792072407	4.061734277516205
1503	243.0	0.40365448504983387	0.10737958462218294	166.57463914933368	89.24418523822267	7.861528924942084
1504	125.0	0.6906077348066298	0.1987281399046105	82.80508652763321	44.41498646645012	4.819578527740016
1505	105.0	0.6402439024390244	0.15217391304347827	75.36143571373725	42.47645565313509	4.355783128958898
1506	149.0	0.43952802359882004	0.2434640522875817	92.91168824543142	42.32897575104996	13.96385406548413
1507	145.0	0.6170212765957447	0.17901234567901234	100.84062043356596	52.55062865439894	5.5844389466186515
1508	171.0	0.38513513513513514	0.13701923076923078	118.77564927611034	58.83843920024655	11.504734822627741
1509	171.0	0.59375	0.4609164420485175	113.45584412271572	60.2082848659724	5.7030603330100105
1510	138.0	0.6764705882352942	0.1396761133603239	106.76955262170047	60.465482237162625	3.356100719387089
1511	106.0	0.6928104575163399	0.19924812030075187	79.8700576850888	45.78215310121332	3.3891136673956166
1512	128.0	0.7804878048780488	0.14746543778801843	83.29646455628166	44.727726042108564	4.257788779352931
1513	164.0	0.5616438356164384	0.16666666666666666	118.84671708797582	51.87383481099878	7.425575424778593
1514	113.0	0.6042780748663101	0.1524966261808367	87.25483399593904	47.50349181584995	4.527479204647241
1515	183.0	0.5791139240506329	0.10457142857142857	126.92388155425118	69.37860890747608	6.007113240559211
1516	124.0	0.6108374384236454	0.13777777777777778	95.04163056034261	59.87726569832238	3.5251797461643237
1517	137.0	0.548	0.3914285714285714	98.17766952966369	56.55302228351128	5.792623567887771
1518	181.0	0.48787061994609165	0.31922398589065254	130.2842712474619	71.11066496536826	6.204007859389839
1519	114.0	0.6	0.24675324675324675	81.97056274847714	48.6713241460952	4.63420535772374
1520	109.0	0.7414965986394558	0.18319327731092436	80.01219330881975	42.53905413113671	3.7446193205017084
1521	119.0	0.6574585635359116	0.1386946386946387	84.22539674441619	45.07927692856083	4.437232197628
1522	80.0	0.7692307692307693	0.5161290322580645	58.278174593052015	34.44772731491433	3.19868454795172
1523	108.0	0.6352941176470588	0.17647058823529413	80.59797974644665	44.1010263868563	4.202441451086541
1524	117.0	0.6324324324324324	0.21666666666666667	88.00609665440987	48.970241043076925	4.428218016272896
1525	148.0	0.578125	0.18925831202046037	101.63351365237939	53.02677890421843	5.546274183562234
1526	182.0	0.4631043256997455	0.12638888888888888	133.5685424949238	71.64736881631283	7.695966632234765
1527	199.0	0.4344978165938865	0.17274305555555555	136.84062043356593	75.24674949661615	8.534993346232588
1528	86.0	0.8269230769230769	0.1575091575091575	57.25483399593904	36.83115044100354	3.149192248225867
1529	40.0	0.7843137254901961	0.47058823529411764	33.27817459305202	18.48387790056376	3.0815998697187577
1530	34.0	0.8947368421052632	0.37362637362637363	28.106601717798213	15.735867458247448	2.7806395496948517
1531	215.0	0.46436285097192226	0.0937227550130776	149.16652224137047	80.36190865794804	6.496176207667171
1532	191.0	0.5840978593272171	0.34790528233151186	129.24873734152914	69.21345964988173	4.656838288612806
1533	274.0	0.24464285714285713	0.06805762543467461	197.3086578651014	99.82062167457151	19.258648509715357
1534	77.0	0.7549019607843137	0.22	55.90559159102155	30.003204963582462	3.597749651638496
1535	179.0	0.3792372881355932	0.1043731778425656	130.3319984622144	66.42648408329833	12.245227942200051
1536	146.0	0.776595744680851	0.15598290598290598	94.81118318204308	49.827932044452126	4.065545627013932
1537	110.0	0.41509433962264153	0.19642857142857142	72.62741699796952	46.162994651797646	8.839921140476164
1538	101.0	0.452914798206278	0.28055555555555556	77.38477631085023	46.932054890152536	6.562975414802884
1539	174.0	0.6083916083916084	0.13425925925925927	115.71067811865476	60.16849564235167	5.044024550125561
1540	171.0	0.48169014084507045	0.15966386554621848	118.77564927611034	62.06501774824713	7.181090288700307
1541	100.0	0.6802721088435374	0.1400560224089636	77.25483399593904	42.584745181392044	3.881684922286587
1542	54.0	0.9152542372881356	0.4	35.79898987322333	17.874048586507566	3.845062430831074
1543	86.0	0.7818181818181819	0.2023529411764706	61.01219330881976	32.399396963200104	3.7161315206607926
1544	183.0	0.56656346749226	0.10790094339622641	127.8528137423857	68.13944279046693	5.098615667717587
1545	101.0	0.7593984962406015	0.21041666666666667	70.18376618407356	36.60804361172947	3.732732475098292
1546	109.0	0.6942675159235668	0.35855263157894735	77.14213562373095	43.63474578783583	3.713437521313395
1547	128.0	0.579185520361991	0.17582417582417584	99.07716446627535	58.17920291980784	4.689549131134292
1548	153.0	0.3825	0.1951530612244898	108.59797974644665	58.78926721607129	11.261562343377507
1549	65.0	0.7831325301204819	0.52	46.242640687119284	28.57755188020452	3.0783807338441607
1550	144.0	0.4311377245508982	0.10227272727272728	104.26093065034891	59.557556681545734	7.36074868045453
1551	55.0	0.7432432432432432	0.2391304347826087	43.10660171779821	27.965851591579042	2.672493056668481
1552	151.0	0.601593625498008	0.11005830903790087	110.81118318204308	62.89780251041348	4.423477618565419
1553	225.0	0.46680497925311204	0.09057971014492754	159.30256121069155	88.9750680914951	7.43261440404673
1554	154.0	0.4709480122324159	0.18160377358490565	112.35533905932738	61.283811277425166	6.938832870693712
1555	157.0	0.5688405797101449	0.1903030303030303	113.52691193458118	66.34213729620794	4.5576151136645695
1556	236.0	0.2636871508379888	0.16929698708751795	177.01828996322962	96.44055610381487	17.23898647304727
1557	172.0	0.5165165165165165	0.11068211068211069	118.43860018001261	61.18859371953689	7.064626399510503
1558	133.0	0.6157407407407407	0.31971153846153844	101.5208152801713	61.40489201343607	3.549307511834206
1559	165.0	0.4342105263157895	0.15406162464985995	114.70458146424487	62.31946933802165	8.174193664831536
1560	105.0	0.4883720930232558	0.1724137931034483	74.84062043356595	36.685720576925426	8.448960600583248
1561	119.0	0.5639810426540285	0.40476190476190477	93.9350288425444	56.58039689121981	4.420756547379008
1562	164.0	0.486646884272997	0.12293853073463268	115.53910524340094	60.776652795475066	7.89602406136641
1563	188.0	0.37524950099800397	0.08526077097505669	135.8528137423857	73.76266896023232	9.604696661909793
1564	157.0	0.48757763975155277	0.1475563909774436	120.8050865276332	65.30642663992289	6.544437035936348
1565	141.0	0.7121212121212122	0.12771739130434784	107.53300858899107	60.04359800023152	3.4488625156289143
1566	108.0	0.6625766871165644	0.21301775147928995	81.04163056034261	44.52285439958962	4.027435562530695
1567	104.0	0.6933333333333334	0.25	70.90559159102155	36.78536845736077	4.87044996287023
1568	111.0	0.6809815950920245	0.15310344827586206	77.9827560572969	42.82240124119863	4.328180429971689
1569	113.0	0.7151898734177216	0.15650969529085873	86.42640687119285	47.53851049925349	3.371315093488247
1570	132.0	0.45674740484429066	0.1793478260869565	93.4558441227157	55.92748106406077	6.980312241044469
1571	125.0	0.49407114624505927	0.15432098765432098	91.90559159102155	51.75035895913514	5.4537527997389095
1572	175.0	0.6227758007117438	0.1447477253928867	106.12489168102785	55.13142622649042	5.684424601432507
1573	122.0	0.6931818181818182	0.5422222222222223	86.48528137423858	53.020165940022224	3.387676884448588
1574	83.0	0.6014492753623188	0.1976190476190476	62.73401871576773	34.95515030919627	5.1729980122767145
1575	103.0	0.5852272727272727	0.29941860465116277	82.31370849898477	50.10715002251744	3.488109663357398
1576	242.0	0.3980263157894737	0.09777777777777778	167.98885271170678	92.76207886806782	9.294619334910323
1577	128.0	0.49230769230769234	0.24615384615384617	86.76955262170047	47.075779382964406	7.975970954934802
1578	117.0	0.4223826714801444	0.17105263157894737	87.90559159102153	44.55644985247065	8.26680915143445
1579	128.0	0.8050314465408805	0.15900621118012423	86.81118318204308	45.20532927340202	3.7533425480899747
1580	135.0	0.6818181818181818	0.1569767441860465	101.08326112068524	53.22493414176659	3.553470666853951
1581	132.0	0.6666666666666666	0.12903225806451613	92.53910524340094	49.185805789673076	4.67176405054662
1582	95.0	0.7364341085271318	0.39915966386554624	67.9350288425444	38.66840272516776	3.648891486135263
1583	115.0	0.625	0.17113095238095238	90.18376618407356	48.58785624811377	3.9099067470066804
1584	176.0	0.3378119001919386	0.24615384615384617	135.14823227814082	76.20443518105849	10.531695023032563
1585	112.0	0.7516778523489933	0.23931623931623933	83.66295090390226	44.87076812905613	3.398023759137671
1586	103.0	0.7984496124031008	0.22008547008547008	65.84062043356595	34.20831975986114	4.123496824955945
1587	134.0	0.7282608695652174	0.1810810810810811	89.70458146424487	45.60298804928019	4.148867750400313
1588	141.0	0.6588785046728972	0.27115384615384613	101.72792206135784	58.89211833109476	3.8304535807753055
1589	180.0	0.5309734513274337	0.15734265734265734	120.5685424949238	62.62788434781009	6.744138993177664
1590	104.0	0.5279187817258884	0.25552825552825553	76.62741699796952	43.480224179975956	5.372760460245369
1591	115.0	0.5299539170506913	0.17424242424242425	90.49137802864844	49.660085611132146	5.3029844226527665
1592	167.0	0.5284810126582279	0.13963210702341136	113.63961030678928	59.47512672050281	7.552898802265898
1593	85.0	0.7727272727272727	0.5151515151515151	61.65685424949238	37.033417453316325	3.12640922385097
1594	115.0	0.7666666666666667	0.2060931899641577	75.84062043356595	39.25616014858927	4.060647981901949
1595	95.0	0.7480314960629921	0.3298611111111111	71.55634918610403	39.35703990499164	3.2799951776868945
1596	77.0	0.5422535211267606	0.19743589743589743	53.935028842544405	35.75639853984299	5.164174358451849
1597	80.0	0.8	0.5333333333333333	55.242640687119284	34.04286162372139	3.0852183825715644
1598	66.0	0.7252747252747253	0.44	55.82842712474619	34.972391340453804	2.5810601462115197
1599	96.0	0.8275862068965517	0.16161616161616163	66.11879502661797	37.42363796775653	3.3702335284176446
1600	36.0	0.8181818181818182	0.631578947368421	36.207106781186546	21.623339018618857	2.2080883429609015
1601	121.0	0.7707006369426752	0.17236467236467237	76.8111831820431	40.19172337864128	4.523886239310724
1602	95.0	0.7983193277310925	0.4846938775510204	61.89949493661167	33.06973190603554	3.9081320963958235
1603	94.0	0.7899159663865546	0.1934156378600823	65.2193000900063	35.10028311449902	3.6718008742940977
1604	71.0	0.7634408602150538	0.4382716049382716	53.44974746830583	31.122679836105824	3.0846205487138194
1605	69.0	0.8023255813953488	0.5111111111111111	50.44974746830583	30.466864621375432	2.9568674293420663
1606	53.0	1.0	0.9814814814814815	53.207106781186546	30.610519893826197	1.9985724497227064
1607	105.0	0.8333333333333334	0.17558528428093645	69.53300858899107	37.264820328385994	3.738724896578219
1608	108.0	0.7552447552447552	0.27692307692307694	79.97056274847714	44.71592809919162	3.273774372942488
1609	57.0	0.7916666666666666	0.40714285714285714	42.72792206135786	22.38778398956086	3.5716893635430407
1610	120.0	0.6666666666666666	0.2097902097902098	88.83452377915606	51.00098140074485	3.7577928724170393
1611	73.0	0.6517857142857143	0.17176470588235293	56.698484809834994	34.770181137756495	3.514089004405375
1612	62.0	0.7560975609756098	0.35428571428571426	47.071067811865476	28.68918365413988	3.0092542574851215
1613	63.0	0.7590361445783133	0.63	47.03553390593274	29.379462497976508	3.177239803372994
1614	81.0	0.7431192660550459	0.25961538461538464	56.2842712474619	29.547869588731373	3.9121671623506447
1615	80.0	0.8	0.37037037037037035	55.17766952966368	28.091858104465047	3.8206685591139147
1616	114.0	0.7651006711409396	0.19256756756756757	85.01219330881976	44.65920370558999	3.4808493672330165
1617	92.0	0.7931034482758621	0.20175438596491227	61.840620433565945	32.79462431819362	3.9335630522479796
1618	82.0	0.803921568627451	0.3106060606060606	56.24873734152915	28.731907576790967	3.8273768549825937
1619	46.0	0.7796610169491526	0.40350877192982454	32.27817459305203	21.474376027097783	2.8643797603092533
1620	65.0	0.7738095238095238	0.5652173913043478	46.89949493661166	25.688201418886845	3.8526529926317994
1621	98.0	0.7153284671532847	0.35	72.9350288425444	38.84166760666603	3.7866346280688274
1622	61.0	0.7625	0.4420289855072464	43.86396103067893	26.620520986683957	3.07714114560631
1623	65.0	0.7558139534883721	0.24621212121212122	49.798989873223334	27.718130883802345	3.230716329347151
1624	156.0	0.616600790513834	0.22285714285714286	109.31980515339464	57.56040799570797	4.610890626221935
1625	61.0	0.7721518987341772	0.2606837606837607	44.698484809834994	23.660367175473084	3.519360224949906
1626	43.0	0.7962962962962963	0.5972222222222222	34.65685424949238	21.077672900293972	2.826506953883078
1627	43.0	0.8958333333333334	0.7962962962962963	36.207106781186546	20.921154492200497	2.7389080031788295
1628	124.0	0.6048780487804878	0.2995169082125604	94.38477631085023	53.20090486681485	4.672726925386539
1629	49.0	0.8596491228070176	0.2552083333333333	37.798989873223334	20.892265079225695	3.258879959929106
1630	88.0	0.5789473684210527	0.21728395061728395	60.90559159102154	32.378601951009706	5.861883049682334
1631	56.0	0.835820895522388	0.28717948717948716	35.62741699796952	19.65116218920636	4.129311367359995
1632	42.0	0.8571428571428571	0.4666666666666667	31.899494936611667	16.864644913926625	3.242446166490395
1633	45.0	0.9	0.8035714285714286	30.82842712474619	16.263715379419807	3.6984089449235262
1634	34.0	0.918918918918919	0.8095238095238095	27.621320343559645	15.632619774416591	2.795526893953447
1635	32.0	0.9142857142857143	0.8205128205128205	26.207106781186546	14.878826716409588	2.822103035513813
1636	39.0	0.9069767441860465	0.40625	28.142135623730947	14.896372528260803	3.4893647041253546
1637	41.0	0.8913043478260869	0.4659090909090909	28.142135623730947	13.839551851928162	3.8620392375010395
1638	108.0	0.5094339622641509	0.3282674772036474	89.31370849898477	54.97646559872712	5.4769525670297385
1639	38.0	0.8444444444444444	0.3838383838383838	28.970562748477143	14.81405820843178	3.456203328372985
1640	103.0	0.7410071942446043	0.5049019607843137	69.72792206135786	37.33404091870254	4.2780520270664155
1641	36.0	0.5714285714285714	0.4675324675324675	28.692388155425117	13.13699718737062	6.7877555853662495
