# Supplementary material for: Misic, a general deep learning-based method for the high-throughput cell segmentation of complex bacterial communities
Source: eLife. 2021 Sep 9;10:e65151. doi: 10.7554/eLife.65151 (PMC8478410; doi:10.7554/eLife.65151)
Supplement: Figure 5—source data 4. [file elife-65151-fig5-data4.csv]

	area	extent	perimeter	minor_axis_length	solidity	major_axis_length
0	62.0	0.8051948051948052	0.45588235294117646	40.72792206135786	20.534145951213233	4.1467920605575435
1	80.0	0.6557377049180327	0.4444444444444444	58.656854249492376	33.935416412620874	3.6366210830964567
2	32.0	0.8648648648648649	0.5818181818181818	24.48528137423857	12.223534778196491	3.4037035015143178
3	38.0	0.926829268292683	0.8444444444444444	27.82842712474619	16.248594325163868	3.055320443140009
4	184.0	0.5154061624649859	0.2884012539184953	126.07716446627535	66.46587486779912	6.4630805352509295
5	52.0	0.8125	0.65	38.621320343559645	22.15022713912859	3.2618441155462508
6	157.0	0.5880149812734082	0.28545454545454546	110.21320343559643	59.32397400172056	5.053725362942868
7	92.0	0.5443786982248521	0.3786008230452675	63.45584412271572	31.733029132695346	7.214753581853887
8	49.0	0.6533333333333333	0.28823529411764703	37.520815280171306	21.467457769199793	4.643337713779595
9	92.0	0.6814814814814815	0.575	73.24264068711929	43.532313296975545	3.4975126939315193
10	96.0	0.732824427480916	0.631578947368421	74.82842712474618	41.02118188305918	3.457399187134734
11	63.0	0.8513513513513513	0.7159090909090909	43.82842712474619	25.100456642945172	3.315269493684584
12	148.0	0.6788990825688074	0.2690909090909091	107.17766952966369	61.69376993294513	3.5849301853465625
13	44.0	0.8148148148148148	0.29333333333333333	28.349242404917497	19.458850614574956	3.031145576091234
14	39.0	0.8125	0.3	26.349242404917497	17.652388726154964	2.9403465346710185
15	100.0	0.6802721088435374	0.11904761904761904	65.25483399593904	46.04550552347276	3.615110107291306
16	43.0	0.7818181818181819	0.25595238095238093	34.384776310850235	20.62336646157883	3.0916522104091104
17	45.0	0.7894736842105263	0.3146853146853147	34.00609665440988	17.90204414251285	3.8713605881488213
18	85.0	0.7024793388429752	0.25297619047619047	60.834523779156065	32.99676468923551	4.108118088622991
19	98.0	0.7101449275362319	0.20416666666666666	73.35533905932738	38.85187466154092	3.6035833268132214
20	49.0	0.8909090909090909	0.362962962962963	35.79898987322333	18.35676169284125	3.4646636303451337
21	56.0	0.8115942028985508	0.3888888888888889	40.970562748477136	20.943190583349562	3.6182802355494292
22	62.0	0.7848101265822784	0.3522727272727273	47.55634918610404	24.959690331559532	3.357058519497382
23	221.0	0.32838038632986627	0.19134199134199134	163.08326112068522	90.88888150082231	11.152640222858698
24	131.0	0.6752577319587629	0.18194444444444444	98.73401871576773	52.800093284476965	3.6898327413168
25	106.0	0.6272189349112426	0.17320261437908496	78.2193000900063	41.03316495138694	4.784600675098474
26	100.0	0.6711409395973155	0.1697792869269949	74.39087296526012	40.25010059543854	3.8902701779026274
27	88.0	0.7457627118644068	0.19172113289760348	63.18376618407357	34.54269998732395	3.5753716652129106
28	91.0	0.7647058823529411	0.20222222222222222	59.59797974644667	32.793335699982045	4.303160656110496
29	237.0	0.5096774193548387	0.08494623655913978	154.30865786510142	87.32729120961218	5.380619323669624
30	143.0	0.7295918367346939	0.12813620071684587	95.78174593052023	51.27593341834991	4.089161400164785
31	166.0	0.5236593059936908	0.10401002506265664	114.98885271170677	60.34562390254185	7.188407595293086
32	216.0	0.42023346303501946	0.10285714285714286	138.75230867899737	72.7027769303977	9.543057373292744
33	107.0	0.84251968503937	0.18608695652173912	68.32590180780451	35.88436039567071	3.888432983386665
34	265.0	0.4233226837060703	0.07066666666666667	183.58683245815342	99.06346613025751	10.080696939013329
35	63.0	0.84	0.28	43.11269837220809	22.525740625404826	3.769556073434692
36	74.0	0.6324786324786325	0.34101382488479265	58.31370849898477	35.40233303508379	4.104712559755627
37	84.0	0.6829268292682927	0.22281167108753316	64.04163056034261	34.59883307478606	3.8285390574392792
38	60.0	0.8108108108108109	0.2777777777777778	44.66295090390226	22.45986131807557	3.5394862488991294
39	86.0	0.8269230769230769	0.21994884910485935	59.59797974644667	31.08657499776346	3.672383652407817
40	81.0	0.8181818181818182	0.21428571428571427	56.42640687119286	28.701106353317186	3.9238531635367955
41	33.0	0.8461538461538461	0.55	23.899494936611667	11.376776244842814	3.9771616050549556
42	51.0	0.8095238095238095	0.3148148148148148	38.97056274847714	19.879471218803953	3.451316225971813
43	141.0	0.39166666666666666	0.18552631578947368	97.11879502661796	46.37999709900486	12.325863205167604
44	129.0	0.5058823529411764	0.22473867595818817	86.698484809835	50.68665683544999	6.1516410691447465
45	99.0	0.6923076923076923	0.34375	69.97056274847714	36.63506477547186	4.674440977390547
46	58.0	0.8923076923076924	0.29591836734693877	39.11269837220809	19.89346482980688	3.8358559299917414
47	234.0	0.6610169491525424	0.10636363636363637	138.95941546018392	74.033227178722	5.546972679698338
48	103.0	0.762962962962963	0.20436507936507936	66.08326112068524	34.760836000959	4.347287614472061
49	147.0	0.5464684014869888	0.1078503301540719	110.08935777509511	58.50119987190269	4.833122157857847
50	121.0	0.657608695652174	0.125	93.2193000900063	54.87385989931084	3.449479616867032
51	138.0	0.6160714285714286	0.1283720930232558	100.9827560572969	56.93330932030229	4.058966180314397
52	67.0	0.7976190476190477	0.2392857142857143	46.698484809834994	24.7444917481506	4.021959248217084
53	53.0	0.726027397260274	0.265	43.384776310850235	22.897380686821265	3.1915958042146
54	33.0	0.7021276595744681	0.38823529411764707	28.414213562373096	19.57004945046667	2.630494363127107
55	43.0	1.0	0.9347826086956522	42.207106781186546	25.000030219176438	1.9935274165524461
56	98.0	0.5632183908045977	0.34146341463414637	76.48528137423858	45.38820199690359	4.370330751236065
57	52.0	0.6753246753246753	0.2826086956521739	44.89949493661166	26.371355023788194	2.9794425646928664
58	91.0	0.7109375	0.203125	62.148232278140824	32.89860684133657	4.251396722733204
59	50.0	0.847457627118644	0.47619047619047616	34.72792206135785	17.49746256038454	3.7414975541808606
60	81.0	0.75	0.24545454545454545	56.148232278140824	27.973709900031558	4.532577275771269
61	63.0	0.8873239436619719	0.20588235294117646	43.35533905932738	26.30033927013773	3.1060681642037964
62	171.0	0.59375	0.11103896103896103	116.50966799187808	61.409055006154304	5.708664498959403
63	217.0	0.46170212765957447	0.13760304375396323	160.76955262170048	101.76480655285718	5.555930100675784
64	91.0	0.6363636363636364	0.2446236559139785	65.04163056034261	36.46579920356718	4.354739852777438
65	78.0	0.8041237113402062	0.2422360248447205	54.73401871576773	28.461644159336757	3.9077838898036332
66	65.0	0.7065217391304348	0.20123839009287925	41.248737341529164	28.014294047697256	3.9034854721952392
67	78.0	0.8387096774193549	0.21606648199445982	50.18376618407357	28.31875069341919	3.7851186421355334
68	80.0	0.8695652173913043	0.18306636155606407	57.4619407771256	31.928156125138635	3.2558173242324924
69	241.0	0.5738095238095238	0.1195436507936508	151.4386001800126	80.75513081449024	5.716114335220482
70	45.0	0.8823529411764706	0.3409090909090909	32.04163056034262	15.732672533523386	3.754050012470358
71	38.0	0.76	0.3958333333333333	31.899494936611664	17.806069373892562	3.0988987125297727
72	88.0	0.676923076923077	0.21674876847290642	64.52691193458118	33.34620053042655	4.693489540723151
73	185.0	0.6981132075471698	0.11591478696741854	131.29646455628165	69.2566391030088	4.098714373164691
74	177.0	0.5221238938053098	0.10034013605442177	123.61017305526643	67.05496897361385	6.968765346164516
75	76.0	0.8444444444444444	0.2111111111111111	54.42640687119285	29.512343292561113	3.5379991884353355
76	130.0	0.7471264367816092	0.14942528735632185	84.46803743153546	44.42309877609024	4.820556252690272
77	230.0	0.5793450881612091	0.09292929292929293	149.10155108391484	79.26855960415652	5.229930119736979
78	90.0	0.7142857142857143	0.20361990950226244	63.97665940288702	33.57993987012765	4.379580429489151
79	44.0	0.8627450980392157	0.39285714285714285	33.55634918610404	17.099143395081228	3.3696932122275935
80	43.0	0.7818181818181819	0.28104575163398693	35.10660171779821	21.122304893640365	2.6889783985971745
81	72.0	0.7422680412371134	0.21301775147928995	56.42031021678297	31.887414795608116	3.127664276368551
82	63.0	0.6847826086956522	0.16153846153846155	54.76345596729059	32.973835580785384	2.998368464784851
83	301.0	0.4106412005457026	0.0660377358490566	209.96551211459382	115.72835454938226	9.271345848659154
84	82.0	0.6776859504132231	0.1555977229601518	63.66295090390226	39.01506133728899	3.1245993202049327
85	71.0	0.8068181818181818	0.24149659863945577	52.49137802864845	26.549271867803807	3.519137442052947
86	44.0	0.8979591836734694	0.36363636363636365	29.798989873223334	15.634528318658079	3.6476466256986977
87	285.0	0.4982517482517482	0.07042253521126761	186.10764773832474	102.18670721805603	7.74298486916671
88	46.0	0.8846153846153846	0.2987012987012987	34.248737341529164	18.047948336534066	3.2575796985002112
89	78.0	0.7090909090909091	0.20526315789473684	54.976659402887016	29.532092138803062	4.248700700170784
90	45.0	0.8333333333333334	0.34615384615384615	33.59188309203678	16.90909784906385	3.458171936249079
91	58.0	0.8285714285714286	0.32954545454545453	40.04163056034261	20.803066923311434	3.792234059823761
92	60.0	0.8108108108108109	0.2564102564102564	41.45584412271571	23.656676908911823	3.4745861247736216
93	106.0	0.6583850931677019	0.17096774193548386	75.01219330881976	42.304356754500766	4.022409257449924
94	197.0	0.6746575342465754	0.123125	125.4386001800126	65.50127303933355	4.679133690520886
95	108.0	0.8120300751879699	0.20689655172413793	72.63351365237939	37.532440639424664	3.8868232333059343
96	36.0	0.8780487804878049	0.5	27.899494936611667	14.135126580927253	3.337134720999757
97	133.0	0.7074468085106383	0.18421052631578946	88.84062043356595	46.17289729224151	4.0263718516348845
98	120.0	0.7017543859649122	0.19607843137254902	80.0477272147525	41.13041040655264	4.428117961102132
99	107.0	0.6294117647058823	0.2494172494172494	73.28427124746189	39.76142693530324	4.801430383586205
100	83.0	0.7545454545454545	0.45604395604395603	56.14213562373095	29.295790484212617	4.260797510503485
101	49.0	0.875	0.6533333333333333	32.485281374238575	16.46975795941835	3.8800057585703662
102	70.0	0.8333333333333334	0.4166666666666667	46.970562748477136	24.017119988326822	3.92927117365398
103	56.0	0.7777777777777778	0.3684210526315789	43.14213562373095	22.636745851132844	3.4048558550501045
104	53.0	0.8412698412698413	0.3897058823529412	38.970562748477136	19.797279614406023	3.4973531726130327
105	159.0	0.636	0.1606060606060606	114.97665940288702	64.56232032605432	3.9613029783840665
106	34.0	0.85	0.5151515151515151	25.899494936611667	13.060993440805643	3.465909182855123
107	64.0	0.7804878048780488	0.36363636363636365	48.7634559672906	25.158369485622092	3.4377556013944917
108	72.0	0.7912087912087912	0.375	52.3492424049175	27.34887025613645	3.65474991587424
109	76.0	0.7916666666666666	0.2360248447204969	55.31980515339463	29.352471996668935	3.523601451093917
110	91.0	0.7583333333333333	0.19117647058823528	68.42640687119285	35.72695163385554	3.527845314092626
111	151.0	0.5490909090909091	0.13566936208445643	116.25483399593904	63.43663297943314	4.147058720989578
112	173.0	0.5562700964630225	0.14562289562289563	119.98885271170677	52.75484426407742	8.461824470178206
113	106.0	0.7066666666666667	0.16307692307692306	70.32590180780451	39.596813302420884	4.220830416054646
114	95.0	0.7364341085271318	0.20474137931034483	70.18376618407356	36.00424450369042	3.8110752571925213
115	142.0	0.7029702970297029	0.1223083548664944	99.84671708797582	55.23276156927373	3.899279207078418
116	137.0	0.7527472527472527	0.13223938223938225	95.53910524340094	51.494758908849256	3.748410418661908
117	169.0	0.6450381679389313	0.09515765765765766	119.47413408594535	66.73083728198995	3.9936504371017096
118	58.0	0.8529411764705882	0.2761904761904762	41.49137802864845	21.346414872874323	3.807810221939522
119	93.0	0.7209302325581395	0.17613636363636365	66.91168824543142	35.71010452771367	4.053166879842118
120	287.0	0.43093093093093093	0.06316021126760564	198.83556979968262	107.59083172681233	7.307292861190125
121	48.0	0.7868852459016393	0.3333333333333333	34.14213562373095	19.90571806295182	3.5156237882480847
122	183.0	0.6245733788395904	0.12103174603174603	115.095454429505	62.12097899325865	5.783404101457463
123	79.0	0.8144329896907216	0.4340659340659341	55.520815280171306	29.59048130039462	3.5125549493547195
124	120.0	0.7272727272727273	0.2536997885835095	89.79898987322333	49.470104514850895	3.2999803637050933
125	87.0	0.7909090909090909	0.5612903225806452	63.071067811865476	33.215774621024444	3.6752776462492465
126	90.0	0.7377049180327869	0.4166666666666667	69.27817459305203	41.77648082617737	3.0038198565579295
127	88.0	0.7586206896551724	0.25142857142857145	61.11269837220809	31.659345967191967	3.8961024861440943
128	82.0	0.8913043478260869	0.7454545454545455	47.65685424949238	24.607957287377104	4.334045767788101
129	112.0	0.5137614678899083	0.13053613053613053	73.84062043356595	47.08657261696582	6.578612967408866
130	84.0	0.8235294117647058	0.2809364548494983	57.11269837220809	28.46077883995401	3.930799919180815
131	73.0	0.7604166666666666	0.1931216931216931	48.941125496954285	29.742794226518534	3.4279007938798163
132	41.0	0.7321428571428571	0.2847222222222222	36.27817459305202	22.19834347175631	2.593589393863509
133	100.0	0.6172839506172839	0.15037593984962405	76.69848480983498	42.76362424143111	3.8734534639886182
134	229.0	0.47708333333333336	0.08927875243664718	155.4802307403552	81.91137620024982	7.821019838197336
135	181.0	0.5876623376623377	0.09720730397422127	113.9177848998413	66.054121740615	4.720797005692419
136	76.0	0.7835051546391752	0.26573426573426573	53.07716446627535	28.098826687180626	3.7958987593247713
137	95.0	0.5654761904761905	0.22144522144522144	64.00609665440987	40.49354974273996	5.3460698155974375
138	132.0	0.6082949308755761	0.2	95.94112549695427	52.143834760117876	4.4736059639130765
139	53.0	0.8412698412698413	0.7361111111111112	37.86396103067892	19.998837495747612	3.834351078824399
140	122.0	0.5596330275229358	0.41496598639455784	87.55634918610404	49.22132378522387	5.346204033579911
141	97.0	0.5808383233532934	0.26944444444444443	74.49137802864846	36.377064351944675	5.645464373737663
142	98.0	0.620253164556962	0.22528735632183908	70.14823227814082	35.81574185111552	5.503834497106242
143	108.0	0.5142857142857142	0.18	73.35533905932738	40.09839973907065	7.426020011281173
144	35.0	0.7954545454545454	0.38461538461538464	24.86396103067893	15.659181419955802	3.1259017493687993
145	39.0	0.7358490566037735	0.5416666666666666	30.65685424949238	19.217773966046874	3.0687890482307782
146	45.0	0.7894736842105263	0.4017857142857143	33.89949493661167	19.350157132535568	3.3180481668506507
147	83.0	0.7410714285714286	0.2601880877742947	63.59188309203678	34.835475468858405	3.422008957055739
148	71.0	0.6893203883495146	0.5071428571428571	50.48528137423857	31.232114951474916	3.459108280390909
149	182.0	0.5400593471810089	0.14583333333333334	107.53910524340094	56.34026192815302	7.861297832197679
150	269.0	0.3418043202033037	0.1042231693142193	198.98885271170673	105.16683108498334	10.838126296510653
151	66.0	0.7333333333333333	0.22916666666666666	49.526911934581186	25.934095108587403	4.111768610944185
152	386.0	0.2813411078717201	0.04948717948717949	291.27922061357856	158.00561608066715	10.693921091068844
153	61.0	0.8714285714285714	0.24206349206349206	43.90559159102155	24.383506140704927	3.3389326646621442
154	47.0	0.8103448275862069	0.3671875	33.97056274847714	17.532100154295136	3.5877192557627766
155	41.0	0.7735849056603774	0.2733333333333333	33.55634918610404	18.94811948508265	3.0654664338918804
156	148.0	0.751269035532995	0.22945736434108527	94.76955262170047	49.60272349413865	4.076432493783023
157	67.0	0.7444444444444445	0.432258064516129	57.65685424949238	35.7782895303597	2.5454626940405536
158	55.0	0.7971014492753623	0.3125	38.834523779156065	20.382028380223993	3.801569067136157
159	169.0	0.771689497716895	0.11711711711711711	109.33809511662427	59.28068526810518	4.115893624283187
160	121.0	0.8013245033112583	0.13940092165898618	83.29646455628165	45.2990769464462	3.807816640148221
161	141.0	0.8197674418604651	0.16206896551724137	84.12489168102786	45.241433202906585	4.519183890884803
162	107.0	0.5846994535519126	0.25476190476190474	75.49137802864846	40.28775246297507	6.005600277256769
163	81.0	0.5625	0.225	58.8700576850888	31.67522252701245	6.593324311675837
164	126.0	0.7325581395348837	0.2441860465116279	92.24873734152916	48.916629434250204	3.5186360872422933
165	260.0	0.52	0.10333863275039745	180.34419177103416	80.00071721536808	6.913038195881448
166	165.0	0.5015197568389058	0.12222222222222222	110.18986283848344	59.31728224800084	7.351665608910573
167	127.0	0.8141025641025641	0.18091168091168092	76.8111831820431	41.280249577800944	4.368768371606516
168	54.0	0.9	0.34615384615384615	35.834523779156065	17.59256313657251	3.9882811095624087
169	104.0	0.7428571428571429	0.18571428571428572	71.11879502661797	36.50807447628255	4.166557593051864
170	113.0	0.6807228915662651	0.1441326530612245	76.77564927611036	42.5247950641924	4.045188837598911
171	66.0	0.7096774193548387	0.3333333333333333	48.4558441227157	25.465840518247525	4.299364927947356
172	357.0	0.28043990573448546	0.08095238095238096	255.58073580374355	132.77878277557033	12.447140202461629
173	275.0	0.36231884057971014	0.1358695652173913	192.49747468305833	103.96529436090937	9.936049808894763
174	111.0	0.69375	0.19270833333333334	81.56244584051393	43.642768173811056	3.8578292696823944
175	90.0	0.6923076923076923	0.17077798861480076	68.76955262170047	38.562950290932605	3.540258854984404
176	59.0	0.7468354430379747	0.2681818181818182	44.3492424049175	26.105664870636932	3.266859562419808
177	52.0	0.9811320754716981	0.9122807017543859	36.41421356237309	20.541305375098805	3.123926295348739
178	102.0	0.796875	0.19428571428571428	67.70458146424487	34.99038369921371	4.03186077769835
179	117.0	0.6923076923076923	0.16883116883116883	82.70458146424487	42.95964935198228	4.260010094250723
180	138.0	0.7263157894736842	0.13529411764705881	92.95331880577403	49.54874853999835	4.330772055075324
181	175.0	0.6161971830985915	0.12052341597796143	115.4386001800126	60.99734930729752	5.795104015007488
182	221.0	0.3152639087018545	0.11945945945945946	140.29646455628165	69.11569810228389	17.19817852826386
183	211.0	0.5452196382428941	0.09028669234060761	132.2670273047588	77.32013442505955	6.4532844114421755
184	148.0	0.5342960288808665	0.19220779220779222	112.76955262170047	64.5526960565543	4.254312655300775
185	32.0	0.8421052631578947	0.4444444444444444	26.31370849898476	13.748841469205201	3.164843322293124
186	79.0	0.7596153846153846	0.23511904761904762	56.526911934581186	29.9863839036541	3.747637751260438
187	92.0	0.7419354838709677	0.22115384615384615	63.18376618407357	32.527281469429056	4.128210602600785
188	50.0	0.819672131147541	0.32894736842105265	40.970562748477136	21.34800873024351	3.0703946413200582
189	80.0	0.7692307692307693	0.48484848484848486	64.48528137423858	35.374425972869055	3.4640997517402754
190	68.0	0.6071428571428571	0.4358974358974359	54.55634918610405	28.48311793238708	5.7360530217576144
191	168.0	0.7601809954751131	0.11642411642411643	109.33809511662427	60.21596902348542	4.064488622191371
192	132.0	0.7292817679558011	0.16296296296296298	83.05382386916239	44.47724780555771	4.475045767575012
193	182.0	0.4739583333333333	0.21875	132.698484809835	73.97010790151842	7.0024061092317345
194	95.0	0.7307692307692307	0.18095238095238095	76.2842712474619	39.742638462695524	3.476191430292609
195	237.0	0.541095890410959	0.08936651583710407	150.5512985522207	79.87618195911895	7.025143577389588
196	94.0	0.8392857142857143	0.17803030303030304	64.08326112068524	35.32274420882822	3.680725929550621
197	137.0	0.5905172413793104	0.15856481481481483	91.39696961966999	47.93008926186116	6.440666427795178
198	45.0	0.7377049180327869	0.234375	28.970562748477143	20.82631495744148	3.494321723281225
199	105.0	0.7	0.16203703703703703	78.56244584051393	43.370617370095005	3.4095208436854314
200	80.0	0.8080808080808081	0.35714285714285715	56.34924240491749	30.483681132224092	3.4946651669201088
201	113.0	0.8014184397163121	0.24145299145299146	79.90559159102155	41.99642519581009	3.573886519202646
202	235.0	0.5788177339901478	0.07944557133198107	153.9655121145938	88.35574450757971	5.7670058416218675
203	159.0	0.5845588235294118	0.11954887218045113	108.61017305526642	57.75467502624657	6.217939458307162
204	122.0	0.7530864197530864	0.21403508771929824	85.76955262170047	44.32135288447558	3.6946536204404143
205	102.0	0.68	0.17708333333333334	74.18376618407356	40.76326562989229	3.8545454755569133
206	126.0	0.7682926829268293	0.16091954022988506	81.05382386916237	43.430558887536904	4.0451855637957586
207	408.0	0.17200674536256325	0.09123434704830054	262.2497833620557	129.78578466494483	35.404118652372105
208	104.0	0.6190476190476191	0.14857142857142858	77.84062043356595	44.18376166896248	4.22544392673187
209	299.0	0.3898305084745763	0.1419753086419753	178.95331880577405	93.805313745179	13.197651095321557
210	171.0	0.49137931034482757	0.12895927601809956	111.53910524340094	56.777014889311175	8.29073164614963
211	154.0	0.5724907063197026	0.34375	109.79898987322333	62.155760341014435	5.081919162486122
212	175.0	0.4605263157894737	0.22786458333333334	128.49137802864846	75.07432794126063	7.79913093567007
213	89.0	0.7876106194690266	0.1648148148148148	57.18376618407357	35.78828861140734	3.394123572087885
214	129.0	0.6861702127659575	0.134375	94.36143571373725	50.11186054163798	4.179327420310344
215	163.0	0.6680327868852459	0.11609686609686609	109.68124086713189	59.785584015861936	4.707999223712037
216	72.0	0.6371681415929203	0.16783216783216784	60.349242404917504	38.571519910774555	3.5815301123348546
217	66.0	0.8461538461538461	0.6	43.10660171779821	22.584758158887905	4.123924364536476
218	215.0	0.4809843400447427	0.09803921568627451	140.6162697096763	74.62994894346564	6.854568319769863
219	36.0	0.7659574468085106	0.36363636363636365	27.935028842544405	14.056262411860553	4.018691586902949
220	94.0	0.752	0.21658986175115208	68.698484809835	37.00185525592129	3.5139069974478474
221	116.0	0.6590909090909091	0.32222222222222224	86.14213562373095	49.4567047079269	4.075228418433657
222	46.0	0.7540983606557377	0.38333333333333336	35.86396103067892	22.836948942736807	2.7692002421568067
223	193.0	0.5078947368421053	0.34464285714285714	135.62741699796953	80.66357492697243	5.153410937917579
224	141.0	0.6558139534883721	0.14242424242424243	93.29646455628166	49.19012595361012	5.5723324542631545
225	151.0	0.7823834196891192	0.13458110516934046	96.02438661763952	51.37325235129781	4.09657486368646
226	149.0	0.6834862385321101	0.13732718894009216	96.36753236814712	51.35521631582836	4.978443919497396
227	136.0	0.7351351351351352	0.19318181818181818	95.18376618407355	49.59141822670408	3.8768980654827185
228	99.0	0.5076923076923077	0.1596774193548387	72.76955262170048	40.45218193526794	6.969617862245439
229	154.0	0.7475728155339806	0.1527777777777778	108.74011537017759	58.43815459908546	3.696962466551622
230	125.0	0.6218905472636815	0.13950892857142858	85.81118318204308	45.72477481648399	5.672133283151132
231	258.0	0.593103448275862	0.08409387222946545	164.10764773832477	88.82807020135277	5.87719612043391
232	276.0	0.5667351129363449	0.07685881370091896	171.7645019878171	93.45281551580298	7.4318273471974825
233	52.0	0.8813559322033898	0.4	33.21320343559643	16.373946491979126	4.126021545338481
234	212.0	0.6625	0.09667122663018696	137.51576464628795	74.6510288727365	5.009599260726877
235	96.0	0.732824427480916	0.23529411764705882	70.62741699796952	38.75511975131483	3.5856192329177587
236	93.0	0.6940298507462687	0.18787878787878787	67.8700576850888	39.25092380576673	3.5395738617147283
237	81.0	0.680672268907563	0.24923076923076923	54.66295090390226	29.330491501535306	4.306887084240997
238	167.0	0.48265895953757226	0.2573189522342065	125.49137802864846	65.4170260594247	8.100005186485827
239	118.0	0.8676470588235294	0.14532019704433496	77.63961030678928	41.72358321997157	3.697845286667682
240	170.0	0.3794642857142857	0.1445578231292517	118.3259018078045	63.01737827036077	10.924798048515605
241	179.0	0.48641304347826086	0.09686147186147186	128.50966799187808	67.51568478584188	8.290044968812271
242	67.0	0.8589743589743589	0.24814814814814815	45.94112549695428	24.644874023808676	3.5615361069096374
243	166.0	0.453551912568306	0.21642764015645372	121.07716446627535	72.24044568030419	6.274919911930933
244	95.0	0.6551724137931034	0.2261904761904762	71.21320343559643	40.12263137056952	3.8238851095128537
245	90.0	0.6617647058823529	0.19230769230769232	62.597979746446654	33.23128671394008	4.9785319991714445
246	67.0	0.6504854368932039	0.39880952380952384	49.349242404917504	26.269869473046413	3.882031218163307
247	50.0	0.704225352112676	0.2976190476190476	38.44974746830583	24.80292570966684	2.842336405274292
248	72.0	0.6206896551724138	0.22570532915360503	57.14213562373095	35.402886831979565	3.4232933405393737
249	126.0	0.6331658291457286	0.15365853658536585	93.59797974644665	52.617276159968	3.918510711998178
250	66.0	0.6346153846153846	0.40993788819875776	48.55634918610404	26.398974783012275	4.8626221931391775
251	98.0	0.784	0.16498316498316498	70.32590180780451	37.915411641055066	3.7868096646497746
252	202.0	0.6215384615384615	0.09430438842203548	134.65180361560903	70.73870557675438	5.941934464710785
253	143.0	0.7447916666666666	0.13978494623655913	92.74621202458748	48.85252467058911	4.704579485734164
254	291.0	0.6598639455782312	0.07106227106227106	186.39191898578665	104.56391374332189	4.763889866729315
255	151.0	0.5101351351351351	0.22503725782414308	115.5918830920368	71.58537088128587	4.7635469392141925
256	118.0	0.6742857142857143	0.1359447004608295	75.56854249492379	43.466680605621164	4.303368271378133
257	260.0	0.5128205128205128	0.07230255839822025	175.6639969244288	95.15436604601156	6.397835794627512
258	102.0	0.7132867132867133	0.2125	72.76955262170047	38.371025504649396	3.808321130604691
259	140.0	0.5857740585774058	0.19444444444444445	87.46194077712559	45.23609546942703	6.478359056785813
260	50.0	0.847457627118644	0.49019607843137253	36.72792206135786	18.65718134138693	3.4879197804140127
261	106.0	0.6503067484662577	0.3464052287581699	71.59188309203678	38.858959754813384	4.911945255187211
262	93.0	0.744	0.5470588235294118	67.48528137423857	37.521477198550265	3.6085489426926878
263	107.0	0.7482517482517482	0.15922619047619047	75.39696961966999	40.82333492117878	3.8479488449887245
264	127.0	0.7341040462427746	0.14801864801864803	86.26093065034891	45.36800704049116	4.41520969765021
265	178.0	0.5933333333333334	0.11131957473420888	118.50966799187809	63.53997858717724	6.392793871061773
266	126.0	0.5971563981042654	0.43902439024390244	86.42031021678297	46.08696005928979	5.2285794876243425
267	140.0	0.7216494845360825	0.11764705882352941	93.36753236814712	53.406637463980694	3.934210666251141
268	107.0	0.5977653631284916	0.21836734693877552	78.94112549695429	39.42145365884817	5.698865894052936
269	36.0	0.7058823529411765	0.28125	30.692388155425117	19.2711646624885	2.8747500517256244
270	46.0	0.8070175438596491	0.6388888888888888	32.82842712474619	19.506260328132395	3.263643005459223
271	116.0	0.6270270270270271	0.15977961432506887	81.1543289325507	42.72875631133826	4.971631295328235
272	234.0	0.5735294117647058	0.09974424552429667	142.55129855222071	76.27953291377189	6.7008241725660405
273	103.0	0.7923076923076923	0.16612903225806452	76.49747468305833	39.23408874792975	3.496180345606598
274	152.0	0.7378640776699029	0.12179487179487179	102.23149339882606	54.896878919231526	4.117340284870374
275	147.0	0.5764705882352941	0.17294117647058824	104.73401871576772	58.34834123135215	4.8510912946189055
276	117.0	0.785234899328859	0.52	85.07106781186548	48.17751623172742	3.1443553632501846
277	116.0	0.8345323741007195	0.16	78.01828996322963	41.61464417915155	3.6853324432352483
278	137.0	0.4963768115942029	0.3494897959183674	96.97056274847714	55.64616367925077	5.885743943450156
279	147.0	0.6712328767123288	0.14482758620689656	94.08935777509512	48.89978211052113	5.121015003443907
280	178.0	0.5460122699386503	0.2557471264367816	124.28427124746189	66.83866198608459	6.200366546728949
281	168.0	0.631578947368421	0.09364548494983277	122.33809511662426	69.11431346695548	4.267115258681735
282	41.0	0.7321428571428571	0.5125	31.692388155425117	18.44841427634442	3.603963213330754
283	46.0	0.8363636363636363	0.45098039215686275	34.31370849898477	18.99548689662804	3.1562078024676237
284	32.0	0.8	0.38095238095238093	22.899494936611664	14.084495350169355	3.1625924067223363
285	287.0	0.5061728395061729	0.10891840607210626	194.19595949289328	101.72323260596235	6.8755855114238535
286	216.0	0.5070422535211268	0.4227005870841487	149.6274169979695	83.79223278641973	5.332683510031383
287	101.0	0.7769230769230769	0.1781305114638448	67.29036790187178	37.26384931678053	4.061335611342205
288	238.0	0.39080459770114945	0.16346153846153846	159.3380951166243	60.18688777949417	14.263064735747662
289	159.0	0.7429906542056075	0.13205980066445183	106.29646455628165	57.49073500092905	3.8722318433818
290	109.0	0.8074074074074075	0.6228571428571429	72.48528137423857	39.371475060835486	3.760381037605226
291	105.0	0.6862745098039216	0.34539473684210525	75.5208152801713	42.94413536424331	3.797273719942779
292	45.0	0.7142857142857143	0.5294117647058824	35.31370849898476	18.665151618249194	4.128463858773808
293	82.0	0.6776859504132231	0.3416666666666667	59.9350288425444	33.73054691162958	4.110794156822099
294	314.0	0.3819951338199513	0.16927223719676548	208.72287142747453	62.48212562235711	22.332584559375476
295	191.0	0.28422619047619047	0.1819047619047619	130.59797974644667	54.26701208999481	23.31209277597023
296	124.0	0.5020242914979757	0.20840336134453782	83.59797974644665	43.63904103282894	8.565859679768892
297	167.0	0.6349809885931559	0.24486803519061584	118.34924240491749	71.67712374608422	3.858782244667534
298	44.0	0.7719298245614035	0.55	32.071067811865476	16.817747882742534	4.053124592512108
299	85.0	0.7727272727272727	0.17598343685300208	55.01219330881976	33.134651474980565	3.709362465635366
300	174.0	0.6932270916334662	0.1037567084078712	118.16652224137047	64.40097459020026	4.464537641621355
301	230.0	0.37398373983739835	0.08771929824561403	157.23759005323592	82.02898560649156	11.138156312472887
302	123.0	0.5970873786407767	0.16942148760330578	83.74011537017762	43.80220505363782	6.2383465710411
303	84.0	0.6774193548387096	0.1794871794871795	60.35533905932738	34.86575157411202	3.746290961803564
304	177.0	0.560126582278481	0.12040816326530612	119.19595949289332	63.01738252213296	5.299461612433049
305	158.0	0.5984848484848485	0.10031746031746032	100.5035713374682	65.42386217600783	4.069844630708496
306	218.0	0.5215311004784688	0.08555729984301413	143.89444430272832	78.65161239290995	6.404573131340961
307	81.0	0.6639344262295082	0.4764705882352941	62.86396103067893	37.185190974194406	4.012121081794944
308	101.0	0.5976331360946746	0.255050505050505	73.2842712474619	39.56063859735066	5.078666216320269
309	146.0	0.6606334841628959	0.12331081081081081	100.36753236814712	53.721117743251064	5.586206613161699
310	73.0	0.5615384615384615	0.28515625	56.10660171779821	35.6251547338726	4.893975489050641
311	48.0	0.8888888888888888	0.6666666666666666	33.65685424949238	18.116315226963096	3.513934220843671
312	208.0	0.25552825552825553	0.1092436974789916	151.66904755831214	77.08055935351418	20.790322692983175
313	78.0	0.896551724137931	0.22807017543859648	50.42640687119285	27.133313158950312	3.7487166495565614
314	122.0	0.5570776255707762	0.27111111111111114	87.3492424049175	58.292326242985354	4.304316599137155
315	185.0	0.42923433874709976	0.19392033542976939	120.6335136523794	63.05172635465797	10.950104357302912
316	81.0	0.7570093457943925	0.24107142857142858	53.11269837220809	28.303564012417066	4.31931398597899
317	92.0	0.6344827586206897	0.3194444444444444	67.21320343559643	35.329972876520316	4.805775068733159
318	130.0	0.5701754385964912	0.25691699604743085	95.83452377915607	51.698332583768405	4.9344142064715575
319	63.0	0.6631578947368421	0.30288461538461536	49.9350288425444	27.636093161559135	4.025297369482718
320	40.0	0.8333333333333334	0.38461538461538464	29.556349186104043	15.404173227145485	3.925741609950183
321	130.0	0.5963302752293578	0.30092592592592593	92.97056274847714	54.73258834493247	4.398505426532904
322	96.0	0.588957055214724	0.23529411764705882	71.66295090390226	38.5986475274112	5.001766982133612
323	64.0	0.7111111111111111	0.20512820512820512	51.798989873223334	31.28975312123219	2.957739781038967
324	61.0	0.7093023255813954	0.2946859903381642	48.59188309203678	25.94356805256451	3.5418669438574617
325	65.0	0.7471264367816092	0.25691699604743085	50.384776310850235	27.58017704047729	3.517175117400578
326	93.0	0.8532110091743119	0.6838235294117647	64.65685424949237	36.87595544158442	3.4034535915149005
327	88.0	0.8979591836734694	0.22	51.84062043356595	28.918823491427023	4.060136170490858
328	49.0	0.6901408450704225	0.2474747474747475	39.97056274847714	23.289582063091455	3.4724162622671106
329	162.0	0.41968911917098445	0.13289581624282198	121.15432893255071	65.06111489134837	7.921114748668437
330	176.0	0.350597609561753	0.1685823754789272	126.01219330881975	69.26472719368435	10.7951839510288
331	43.0	0.7962962962962963	0.4095238095238095	32.31370849898476	17.08016081190837	3.4815226690733594
332	291.0	0.20521861777150915	0.0829059829059829	201.0893577750951	104.81223205861163	23.42274610527242
333	96.0	0.7868852459016393	0.19047619047619047	62.66904755831214	33.003329882260815	4.563861062059306
334	122.0	0.6777777777777778	0.1525	92.6335136523794	50.50657668084601	3.59580865792706
335	81.0	0.8709677419354839	0.23823529411764705	53.01219330881976	27.879637097550553	3.871747553857533
336	178.0	0.6926070038910506	0.09758771929824561	126.16652224137047	68.63517323607381	3.757921099958528
337	142.0	0.71	0.13706563706563707	94.12489168102785	50.360818537868774	4.433177452526457
338	136.0	0.6098654708520179	0.1951219512195122	91.42640687119285	47.49460117583442	5.383145648438596
339	136.0	0.6974358974358974	0.12878787878787878	92.36753236814715	50.58918997988128	4.408561474325187
340	153.0	0.7427184466019418	0.42857142857142855	103.72792206135786	57.75178428854248	3.848344764308684
341	158.0	0.632	0.1371527777777778	100.36753236814714	52.58519572951946	5.8543073998716535
342	133.0	0.910958904109589	0.1698595146871009	79.88225099390857	42.5937714348175	4.05179285880278
343	99.0	0.6513157894736842	0.2619047619047619	72.89949493661166	47.940226226932495	3.1377237401689917
344	231.0	0.47046843177189407	0.24012474012474014	154.35533905932738	83.86437424028472	8.787967985009784
345	158.0	0.6899563318777293	0.12559618441971382	100.02438661763951	54.775955440222376	4.413322638869993
346	97.0	0.8660714285714286	0.20208333333333334	63.49747468305833	33.54767950666517	3.7814547682683033
347	194.0	0.5914634146341463	0.11265969802555169	123.33809511662427	65.12071806988126	6.81881546068442
348	369.0	0.2914691943127962	0.05105853051058531	251.1848122046001	141.22190677456024	14.415323341565218
349	157.0	0.6085271317829457	0.12921810699588476	110.71067811865476	59.365771919303285	5.032571148259871
350	98.0	0.6086956521739131	0.22072072072072071	73.79898987322332	44.098453326962776	3.721831336459131
351	265.0	0.32837670384138784	0.21370967741935484	150.50966799187808	71.56681153891282	20.255042088644487
352	157.0	0.7302325581395349	0.1246031746031746	106.36753236814712	57.38602081220102	3.8968656938659776
353	146.0	0.6403508771929824	0.1438423645320197	92.71067811865474	49.15700593890327	5.602799008235272
354	174.0	0.5370370370370371	0.12747252747252746	112.36753236814714	57.83431475443558	8.48861685373569
355	217.0	0.45020746887966806	0.1039272030651341	148.2670273047588	77.01051856079552	8.634262877457864
356	167.0	0.605072463768116	0.102203182374541	119.54520189781081	63.4594564915143	4.811715689481224
357	78.0	0.8125	0.32098765432098764	58.79898987322332	30.524417105493598	3.361165826765671
358	104.0	0.9043478260869565	0.1808695652173913	67.98275605729691	36.516728644965724	3.7266602374728603
359	108.0	0.6206896551724138	0.18620689655172415	74.08326112068524	37.801540770479605	6.085098702119102
360	132.0	0.6567164179104478	0.1736842105263158	90.91168824543142	47.98459315148759	4.76735484772779
361	69.0	0.8023255813953488	0.1875	48.941125496954285	29.29855185100017	3.152269722564822
362	102.0	0.75	0.2361111111111111	63.012193308819754	31.857884574948905	4.984889518523518
363	110.0	0.5913978494623656	0.21696252465483234	82.45584412271572	45.435759335395886	4.452322829115557
364	170.0	0.6563706563706564	0.1362179487179487	115.88225099390856	60.91020585754622	4.712785991651488
365	155.0	0.6919642857142857	0.11183261183261184	102.61017305526642	59.43009999504133	4.012896640746578
366	156.0	0.43454038997214484	0.1392857142857143	105.74011537017759	52.23443736846077	11.07947987494737
367	36.0	0.8372093023255814	0.375	27.935028842544405	15.105305277744458	3.237911897164544
368	198.0	0.2731034482758621	0.11379310344827587	136.63961030678928	72.4653568432304	18.268175769118518
369	163.0	0.7056277056277056	0.11295911295911296	107.64570696119915	58.61753837099747	4.21207570592341
370	100.0	0.746268656716418	0.21551724137931033	69.01219330881976	35.75920454292796	3.9919031121809874
371	170.0	0.4392764857881137	0.25297619047619047	109.84062043356595	56.738181031437826	9.892200455550073
372	186.0	0.6158940397350994	0.09597523219814241	111.19595949289332	67.59955056482073	4.830522379741699
373	94.0	0.6861313868613139	0.1843137254901961	72.01219330881975	38.49102375365982	3.922770099380958
374	101.0	0.753731343283582	0.27297297297297296	73.34924240491749	42.165747026242805	3.193860252187789
375	41.0	0.8913043478260869	0.7592592592592593	33.621320343559645	19.171696503008363	2.685787324690366
376	172.0	0.6798418972332015	0.12198581560283688	115.19595949289332	60.08535273438677	4.599919177941662
377	147.0	0.5231316725978647	0.2672727272727273	110.00609665440987	59.772666614746974	6.100128972666832
378	143.0	0.43202416918429004	0.3055555555555556	103.45584412271572	60.295030455867646	8.290942602728313
379	144.0	0.6923076923076923	0.1342031686859273	94.95331880577405	50.49871791798762	4.6371268507168555
380	138.0	0.5798319327731093	0.23076923076923078	98.2842712474619	53.98706559286437	4.837930378568842
381	165.0	0.5913978494623656	0.15	107.63961030678928	55.90117091330058	6.750883326783039
382	118.0	0.59	0.14047619047619048	89.94112549695429	50.800063821449434	4.207952290141564
383	123.0	0.5324675324675324	0.24848484848484848	89.1126983722081	50.81224176593388	5.161354922710816
384	217.0	0.4965675057208238	0.15433854907539118	155.6335136523794	87.60136945675833	6.311004408328857
385	114.0	0.6909090909090909	0.40714285714285714	82.14213562373094	44.447452917316284	3.9826240729115323
386	182.0	0.7054263565891473	0.10111111111111111	123.82337649086284	67.89741794232955	4.587703661092329
387	154.0	0.6363636363636364	0.13162393162393163	109.98885271170677	53.70641131020512	5.150905200856778
388	66.0	0.7764705882352941	0.24175824175824176	49.87005768508881	26.7956418515361	3.3430994929362825
389	46.0	0.7931034482758621	0.26900584795321636	36.72792206135786	22.201353901768154	2.798811227239488
390	99.0	0.6	0.25	72.07716446627535	38.987867743773826	4.870325391222456
391	50.0	0.8333333333333334	0.3968253968253968	36.14213562373095	19.12705463804455	3.504365973076782
392	32.0	0.8205128205128205	0.45714285714285713	26.449747468305834	15.506612260865348	2.6864197719605256
393	124.0	0.6966292134831461	0.2811791383219955	91.9350288425444	57.19973902586191	3.103227653029324
394	110.0	0.7692307692307693	0.2564102564102564	82.83452377915606	44.232853292218216	3.463454355896819
395	146.0	0.5910931174089069	0.42565597667638483	102.21320343559641	55.29328064999309	5.140080339959449
396	164.0	0.6482213438735178	0.19181286549707602	117.07716446627533	65.45698273580398	3.9034689266403553
397	44.0	0.7333333333333333	0.4	38.24264068711929	24.845760702275932	2.4414959344566207
398	78.0	0.7572815533980582	0.3842364532019704	59.142135623730944	31.534018352776457	3.544981841589357
399	231.0	0.5634146341463414	0.0832732516222062	161.6812408671319	91.43952606308737	4.642857460629252
400	35.0	0.9722222222222222	0.35	27.00609665440988	14.440684683200676	3.0455878697240295
401	107.0	0.7430555555555556	0.1857638888888889	81.52691193458118	44.11861997760294	3.3052925489413867
402	120.0	0.6857142857142857	0.43478260869565216	90.89949493661166	54.121609252920166	3.3779136701691077
403	176.0	0.6068965517241379	0.12137931034482759	120.36753236814714	63.5110294894189	4.642538327228158
404	139.0	0.7637362637362637	0.1404040404040404	90.95331880577405	49.078457130245674	4.3366724365795095
405	176.0	0.6470588235294118	0.11503267973856209	117.88834764831844	62.091276147390815	4.680590830299827
406	150.0	0.4838709677419355	0.2127659574468085	104.39087296526012	54.680881191815864	8.02920148775477
407	42.0	0.8235294117647058	0.7	33.82842712474619	21.57054805560187	2.7053957809417404
408	184.0	0.5125348189415042	0.10430839002267574	126.02438661763951	68.13668013619284	5.877699965135056
409	63.0	0.7590361445783133	0.23333333333333334	45.420310216782966	22.880404784494043	4.611847554965296
410	140.0	0.6965174129353234	0.23333333333333334	100.4558441227157	56.62327394992447	3.4975137303297963
411	139.0	0.6915422885572139	0.24645390070921985	99.2842712474619	53.1708861053614	3.859761511217151
412	203.0	0.7381818181818182	0.10252525252525252	138.16652224137044	72.7603937494374	3.868659253146432
413	70.0	0.8641975308641975	0.29411764705882354	44.526911934581186	22.943800251839832	3.9838435706627853
414	72.0	0.8	0.24	54.42031021678297	29.971625907933966	3.2934331879145
415	62.0	0.8611111111111112	0.6739130434782609	43.86396103067892	24.161080994139486	3.3124997009076087
416	128.0	0.7804878048780488	0.14479638009049775	87.63961030678928	46.84456782042721	3.7779609784771067
417	60.0	0.8450704225352113	0.23809523809523808	48.66295090390226	25.7788010898064	3.0579719014363325
418	71.0	0.6698113207547169	0.30735930735930733	51.384776310850235	25.844171512864406	4.608394417929915
419	247.0	0.6159600997506235	0.08167989417989419	162.86500705120548	86.82844868957021	5.831969081801163
420	98.0	0.7716535433070866	0.16666666666666666	67.29036790187178	37.55834244258694	3.6479591568351224
421	191.0	0.4263392857142857	0.09665991902834008	135.6812408671319	72.4208480600253	7.88463036668205
422	117.0	0.5545023696682464	0.41785714285714287	83.38477631085024	45.15425757453576	6.292609247361341
423	66.0	0.825	0.2857142857142857	47.45584412271571	24.52336633758773	3.5500235105105653
424	101.0	0.6474358974358975	0.4675925925925926	72.48528137423857	42.49559810871517	4.378570748562806
425	143.0	0.7295918367346939	0.5416666666666666	90.97056274847714	48.36643976950481	4.428637538193105
426	107.0	0.6993464052287581	0.16512345679012347	81.59797974644667	43.26169951773958	4.003207373438678
427	147.0	0.765625	0.13125	99.29646455628165	54.52406982982728	3.704839667020245
428	127.0	0.8639455782312925	0.16282051282051282	77.88225099390856	42.755496313454074	3.9631288734944894
429	186.0	0.4869109947643979	0.17714285714285713	117.39696961967	59.61563672239129	8.900532015679525
430	175.0	0.6183745583038869	0.13197586726998492	121.05382386916239	63.82568562297018	5.03121294891904
431	64.0	0.7111111111111111	0.30917874396135264	49.384776310850235	26.38345146108395	3.9764213182995403
432	119.0	0.68	0.16168478260869565	81.9827560572969	42.37808978182155	4.884260238338988
433	189.0	0.390495867768595	0.21774193548387097	133.04772721475248	73.11713350142986	9.497050195160424
434	115.0	0.7876712328767124	0.13739545997610514	81.88225099390857	44.68470803017563	3.617982630509553
435	146.0	0.6790697674418604	0.10695970695970695	100.02438661763951	57.933347847209646	4.51428140259556
436	149.0	0.6772727272727272	0.12990409764603314	100.36753236814714	53.66399660106763	4.606782897681804
437	93.0	0.768595041322314	0.22794117647058823	60.42640687119285	31.391832164954245	4.590324991223927
438	77.0	0.7777777777777778	0.5310344827586206	53.48528137423857	31.993889178439847	3.208569402257703
439	159.0	0.4953271028037383	0.375	108.00609665440987	62.59042136895416	6.492662815759091
440	70.0	0.7368421052631579	0.20710059171597633	51.59188309203678	32.69565882277268	3.2510620340018828
441	117.0	0.5598086124401914	0.14772727272727273	85.53300858899107	44.9493472866227	5.529594355099496
442	44.0	0.6567164179104478	0.4631578947368421	33.52081528017131	20.837272036144288	3.426657028247787
443	66.0	0.7674418604651163	0.5076923076923077	50.86396103067892	29.757300475408996	3.076293654621588
444	174.0	0.6615969581749049	0.12719298245614036	108.8528137423857	58.13981626438153	5.1697157375280005
445	131.0	0.6036866359447005	0.4962121212121212	92.38477631085023	49.858338913152906	4.855467150069132
446	164.0	0.478134110787172	0.08864864864864865	114.05382386916236	68.57765055008545	6.053790484993215
447	97.0	0.7578125	0.15203761755485892	69.87615433949868	39.9973552420743	3.4689258156395595
448	146.0	0.6822429906542056	0.11060606060606061	103.4386001800126	56.97389059275152	4.677334800090868
449	133.0	0.7348066298342542	0.16792929292929293	84.8111831820431	45.57078978544924	4.6290202637614835
450	148.0	0.5849802371541502	0.2901960784313726	105.62741699796952	58.69171676565793	4.5863664371052835
451	113.0	0.6108108108108108	0.17357910906298002	76.01219330881975	42.42303811831339	5.552177762974316
452	113.0	0.6141304347826086	0.18585526315789475	83.11269837220809	45.76835574468529	4.4585828473319555
453	39.0	0.8863636363636364	0.2708333333333333	29.006096654409877	17.050983776214164	2.9582311861078066
454	54.0	0.8059701492537313	0.5	38.48528137423857	19.88104321728373	3.6511951764647312
455	135.0	0.7848837209302325	0.627906976744186	87.72792206135784	47.32576847444477	4.066434642755009
456	201.0	0.37084870848708484	0.08754355400696864	144.64570696119915	77.7434002117219	9.803265633304514
457	170.0	0.6071428571428571	0.11038961038961038	114.61017305526642	60.67626474205714	5.611237248324468
458	242.0	0.7515527950310559	0.13504464285714285	137.4386001800126	71.58234395319276	4.838064727954878
459	126.0	0.6631578947368421	0.16363636363636364	87.15432893255071	45.508685110877494	4.979083763125085
460	75.0	0.8152173913043478	0.16666666666666666	51.941125496954285	32.94907514706463	2.977672890358605
461	232.0	0.42568807339449544	0.1334867663981588	167.91168824543144	95.26104843555915	7.144862489573465
462	116.0	0.8592592592592593	0.15675675675675677	86.3259018078045	44.946706363810826	3.386060588375536
463	196.0	0.7205882352941176	0.11206403659233848	131.095454429505	68.07131107440902	4.067534697485037
464	164.0	0.640625	0.11263736263736264	127.1543289325507	70.1514457654639	4.259237673306135
465	93.0	0.8532110091743119	0.19254658385093168	62.91168824543142	32.946312157080605	3.6473796082808336
466	200.0	0.5194805194805194	0.16025641025641027	150.49137802864846	89.63232904410997	4.849081369538231
467	116.0	0.7341772151898734	0.14215686274509803	83.60407640085653	45.26307510389727	3.596741990679448
468	64.0	0.7804878048780488	0.25396825396825395	49.698484809834994	25.537540752114765	3.598777547178722
469	292.0	0.24313072439633637	0.06899810964083176	200.23759005323595	114.41033374189912	16.88532912316379
470	133.0	0.7556818181818182	0.16339066339066338	91.1543289325507	47.609538200316706	3.9793370000926633
471	183.0	0.6512455516014235	0.11670918367346939	131.88225099390854	70.79560931825323	4.034101676043131
472	126.0	0.6086956521739131	0.12962962962962962	90.46803743153546	49.300546713770075	4.899885488454636
473	75.0	0.6818181818181818	0.1984126984126984	54.8700576850888	30.79710811324099	4.191462046060772
474	129.0	0.6649484536082474	0.21217105263157895	87.59797974644667	46.17530318661946	4.632289432624735
475	52.0	1.0	0.9629629629629629	52.41421356237309	30.066592756745816	1.9985201625794602
476	32.0	0.9142857142857143	0.8205128205128205	24.414213562373096	13.887135802271079	2.8268726906744175
477	113.0	0.875968992248062	0.18108974358974358	70.22539674441617	36.84152450655314	3.9963053438690905
478	361.0	0.41163055872291904	0.07161277524300734	217.32085117392117	112.83681456379198	11.557372039846946
479	68.0	0.8607594936708861	0.2556390977443609	44.11269837220809	23.34377474250181	3.7893057689741445
480	53.0	0.8548387096774194	0.3212121212121212	38.04163056034261	19.464866547454367	3.702499686921986
481	57.0	0.7307692307692307	0.41304347826086957	45.03553390593274	24.75649868833079	3.622165334828782
482	191.0	0.5601173020527859	0.12733333333333333	134.5685424949238	73.54578558722221	5.35477608850209
483	91.0	0.7913043478260869	0.23214285714285715	64.73401871576773	34.269669227473386	3.5681116292508976
484	622.0	0.15822945815314168	0.03539118065433855	441.0965004500315	244.44732480055708	31.49477218176844
485	140.0	0.7142857142857143	0.10510510510510511	96.53910524340094	54.65385120691059	3.8805397909576587
486	216.0	0.4605543710021322	0.0784313725490196	148.4802307403552	80.79900705130521	8.757451461114345
487	181.0	0.40492170022371365	0.11970899470899471	120.67514421272202	59.80446473170864	11.752277478461249
488	153.0	0.5862068965517241	0.14711538461538462	111.8050865276332	63.534235820436535	4.2796992833226275
489	34.0	0.7391304347826086	0.37777777777777777	27.035533905932738	16.99386580105735	3.0584070781007044
490	52.0	0.7878787878787878	0.28888888888888886	37.9350288425444	22.025004847222608	3.481955420568533
491	124.0	0.7005649717514124	0.18452380952380953	80.91168824543142	41.84440554085703	4.807744106359087
492	122.0	0.547085201793722	0.3873015873015873	87.59188309203678	49.220091028611364	6.075419572641849
493	137.0	0.44336569579288027	0.18121693121693122	108.07716446627535	63.23906555066273	6.327526771611288
494	114.0	0.8507462686567164	0.19	70.5685424949238	38.3478081646156	3.994948470113153
495	148.0	0.7668393782383419	0.12091503267973856	99.6812408671319	55.715305582264456	3.8711597747949367
496	77.0	0.7	0.13368055555555555	67.87005768508881	41.05322288179481	2.855796933393479
497	161.0	0.7	0.4192708333333333	101.79898987322333	54.0842093609712	4.667530473120013
498	161.0	0.48936170212765956	0.24283559577677225	109.76955262170048	59.32063758071327	6.697319961497991
499	125.0	0.41118421052631576	0.24509803921568626	96.62741699796952	56.98423351427232	9.410581851877351
500	80.0	0.8	0.2	53.2193000900063	28.943489356544582	3.9005671212774393
501	45.0	0.75	0.32142857142857145	35.48528137423857	22.191272923811212	2.9075888099230935
502	121.0	0.6505376344086021	0.32791327913279134	85.21320343559643	45.95381432467414	4.199775091509223
503	137.0	0.8353658536585366	0.13391984359726294	89.78174593052023	49.057971424862664	3.7185428232073394
504	197.0	0.6080246913580247	0.09065807639208467	136.65180361560903	74.36750344500673	5.1740636587987305
505	138.0	0.7150259067357513	0.12031386224934612	99.78174593052022	52.76845620972945	4.085415199659225
506	92.0	0.6814814814814815	0.2697947214076246	67.42031021678298	37.02029004234659	3.778235408055089
507	52.0	0.7761194029850746	0.48148148148148145	42.03553390593274	28.372998850216486	2.575977123171882
508	218.0	0.4780701754385965	0.08257575757575758	152.23759005323592	84.78190471523311	7.4207661987708935
509	81.0	0.8709677419354839	0.35526315789473684	46.87005768508881	23.343381410513274	4.516136748393748
510	39.0	0.8863636363636364	0.6	27.27817459305202	14.163188701886105	3.494488427704428
511	61.0	0.7439024390243902	0.3177083333333333	49.14213562373095	26.16994029416042	3.3021476819541564
512	166.0	0.5804195804195804	0.29432624113475175	106.18376618407356	54.23071597616586	6.763253249469794
513	115.0	0.6284153005464481	0.12445887445887446	82.36143571373725	47.88971113333251	4.794624282288667
514	135.0	0.5192307692307693	0.12195121951219512	94.94722215136416	54.62567694226747	6.835128757274512
515	69.0	0.8313253012048193	0.46	49.69238815542512	27.868183922872824	3.232031925118057
516	39.0	0.7090909090909091	0.26	29.520815280171306	18.98428729548222	3.075511147996139
517	41.0	0.8541666666666666	0.640625	31.44974746830583	17.752982836717273	3.056664953372492
518	54.0	0.6923076923076923	0.45	45.071067811865476	26.45902645252338	3.097328617033914
519	184.0	0.5878594249201278	0.13086770981507823	113.78174593052023	57.6202700404646	7.6912871636231435
520	115.0	0.7931034482758621	0.18025078369905956	73.94722215136417	39.28623635916622	4.103540293413148
521	130.0	0.6989247311827957	0.24621212121212122	93.8700576850888	50.90227480159817	3.659512192907596
522	152.0	0.6413502109704642	0.127838519764508	103.88225099390856	54.85714674918676	4.59067935765297
523	189.0	0.5369318181818182	0.0945	130.92388155425115	72.16563441024219	6.98185338250293
524	67.0	0.881578947368421	0.24814814814814815	47.148232278140824	24.50651120615219	3.5273601471440843
525	168.0	0.5121951219512195	0.10727969348659004	116.05382386916236	70.58338667738828	4.947654931644125
526	165.0	0.6395348837209303	0.10714285714285714	128.84671708797583	69.17474882563074	3.5753443556781668
527	136.0	0.37988826815642457	0.11774891774891776	100.11879502661797	52.45151919007399	9.579068319947051
528	110.0	0.8333333333333334	0.16296296296296298	72.81118318204308	39.834229106750456	3.8132188177321997
529	90.0	0.6666666666666666	0.22727272727272727	70.7634559672906	41.141743767684446	3.469070569820537
530	65.0	0.7471264367816092	0.43333333333333335	47.31370849898475	27.07944747977238	3.2701768659551
531	111.0	0.5842105263157895	0.2967914438502674	75.2842712474619	38.01566940551179	6.424378624364447
532	119.0	0.7933333333333333	0.15256410256410258	77.39696961966999	43.729759916129346	3.8957023502884494
533	271.0	0.5917030567685589	0.10014781966001478	163.68733752154176	87.30270150682219	6.524410682351121
534	122.0	0.8079470198675497	0.1506172839506173	79.88225099390856	42.71623519577279	4.075932594189318
535	349.0	0.6254480286738351	0.05460804255984979	225.7766952966369	131.60211610786047	4.365719196960141
536	141.0	0.592436974789916	0.141	95.98275605729688	52.72343570745523	5.489022952601013
537	130.0	0.6770833333333334	0.24436090225563908	83.94112549695429	43.7219461096733	5.016936638517047
538	87.0	0.6692307692307692	0.20046082949308755	64.07716446627535	36.83199728085574	3.596005928649034
539	222.0	0.31850789096126253	0.18407960199004975	152.2609306503489	75.40767620247941	17.09378323655002
540	166.0	0.3600867678958785	0.19415204678362574	111.11879502661797	54.18513467043436	13.876094918424538
541	98.0	0.7967479674796748	0.1536050156739812	63.46194077712559	39.73743270553201	3.303879131705985
542	150.0	0.635593220338983	0.10885341074020319	115.32590180780451	68.01607334867633	3.4164161867103244
543	60.0	0.8	0.34285714285714286	46.89949493661166	26.417422344541006	2.9843698391473286
544	186.0	0.4547677261613692	0.21754385964912282	127.29036790187178	65.57509438671927	9.736210961985966
545	123.0	0.825503355704698	0.18222222222222223	74.8111831820431	40.38117090034059	4.421203129700716
546	117.0	0.740506329113924	0.16883116883116883	80.32590180780451	42.4178371581023	3.9069566793272856
547	112.0	0.7417218543046358	0.16568047337278108	76.36143571373725	39.68894588898858	4.956115860733889
548	92.0	0.7603305785123967	0.20175438596491227	59.840620433565945	33.19762004898102	4.222013202756424
549	67.0	0.6907216494845361	0.2392857142857143	53.69238815542512	34.18434277450145	2.8973856537428944
550	38.0	0.9743589743589743	0.3140495867768595	29.420310216782976	15.810689635562118	3.0225265350581716
551	108.0	0.6067415730337079	0.3588039867109635	81.10660171779821	48.8209380916317	4.29999311080002
552	54.0	0.782608695652174	0.45	39.65685424949238	21.941425272689365	3.478395353042743
553	81.0	0.7297297297297297	0.24923076923076923	54.2842712474619	29.145935116857217	4.435062328112237
554	147.0	0.3594132029339853	0.14497041420118342	100.15432893255071	50.98850240236032	12.797236901326306
555	181.0	0.48525469168900803	0.1238030095759234	115.98885271170678	61.41754686021787	8.680235743949245
556	160.0	0.64	0.10256410256410256	106.61017305526642	61.64199257617033	4.720540354595086
557	210.0	0.5023923444976076	0.13059701492537312	146.39696961967	79.0032685907997	6.4141931655841296
558	33.0	0.9166666666666666	0.6346153846153846	25.656854249492376	13.742047065571848	3.144082015815104
559	185.0	0.5441176470588235	0.10818713450292397	123.095454429505	64.96096395244732	6.493428677102723
560	143.0	0.7814207650273224	0.2653061224489796	98.42031021678297	54.88059418365903	3.413688436611633
561	159.0	0.47181008902077154	0.16224489795918368	109.91168824543142	58.120096530047455	8.168503398346777
562	128.0	0.5493562231759657	0.1394335511982571	90.39696961967	47.4520804465284	6.525959487592414
563	130.0	0.7878787878787878	0.1400862068965517	88.71067811865476	47.463709780848795	3.8750964094527793
564	167.0	0.5075987841945289	0.12925696594427244	110.12489168102783	57.104524049573385	7.807612159396564
565	80.0	0.7207207207207207	0.35714285714285715	58.485281374238575	37.348154128170776	2.960216751928849
566	151.0	0.6163265306122448	0.19433719433719435	90.91168824543142	46.53826685996348	6.4662346361224925
567	78.0	0.7572815533980582	0.15476190476190477	61.35533905932737	34.3427912554244	3.2444824599049085
568	268.0	0.46286701208981	0.10056285178236397	164.06601717798213	85.80732375804331	9.459274981627182
569	150.0	0.4098360655737705	0.15	111.8761543394987	59.89138696136934	8.229458673919002
570	221.0	0.5940860215053764	0.08371212121212121	158.03048327204937	86.12030681892378	4.68591606972061
571	169.0	0.6236162361623616	0.12980030721966207	109.19595949289332	56.79603213475909	6.030096100488259
572	187.0	0.49081364829396323	0.13709677419354838	132.3259018078045	74.70731311890664	6.194296777113934
573	148.0	0.5584905660377358	0.3224400871459695	104.79898987322333	57.92141820683957	6.089702559397885
574	109.0	0.7841726618705036	0.3784722222222222	74.55634918610404	40.77080329717245	3.580050352532866
575	142.0	0.4781144781144781	0.16784869976359337	104.66904755831214	54.669174894722936	6.698084470384766
576	157.0	0.45375722543352603	0.11009817671809256	112.63961030678928	60.88602586509726	6.703794629018497
577	83.0	0.9021739130434783	0.27124183006535946	50.18376618407357	25.636328122856348	4.3032516664439235
578	41.0	0.7592592592592593	0.6029411764705882	29.65685424949238	18.01827149177974	3.405713190433025
579	60.0	0.7894736842105263	0.35714285714285715	44.55634918610404	23.428870367459083	3.483170646012339
580	174.0	0.75	0.12719298245614036	107.09545442950498	57.61825185927449	4.999740404730197
581	47.0	0.9038461538461539	0.39166666666666666	34.55634918610404	17.50096300645969	3.559956174100113
582	213.0	0.5246305418719212	0.09594594594594595	150.92388155425118	80.4536635473824	5.372264059566593
583	38.0	0.8444444444444444	0.3247863247863248	29.349242404917497	16.164408288287007	3.0430874361167852
584	94.0	0.7833333333333333	0.1843137254901961	70.80508652763321	37.72282424531312	3.3275714797946234
585	127.0	0.6318407960199005	0.13229166666666667	94.36143571373725	52.09651970810848	4.206655891477673
586	66.0	0.5038167938931297	0.19298245614035087	51.76345596729059	26.74495233664586	7.400797502008095
587	175.0	0.40415704387990764	0.10670731707317073	123.71067811865476	62.968148022650425	10.937466403709761
588	162.0	0.5364238410596026	0.1250965250965251	107.12489168102785	55.10821506815982	7.031688139989868
589	135.0	0.6521739130434783	0.1461038961038961	98.84062043356595	53.973807507195204	3.8128091123383627
590	47.0	0.8392857142857143	0.24479166666666666	35.384776310850235	19.578731128935942	3.221651220821547
591	32.0	0.8421052631578947	0.38095238095238093	25.520815280171306	14.173503765187561	3.015985082558273
592	88.0	0.6875	0.1774193548387097	65.5269119345812	38.994271542527414	3.432719581780629
593	78.0	0.8210526315789474	0.19117647058823528	58.59797974644666	31.149591050931125	3.2694297138242985
594	232.0	0.5190156599552572	0.07969769838543456	165.61626970967632	87.13213368288228	4.951298652508708
595	86.0	0.8514851485148515	0.19501133786848074	58.083261120685236	31.037643256207055	3.9857122010280843
596	137.0	0.6492890995260664	0.15675057208237986	88.9827560572969	46.38420595452941	5.132080220299119
597	179.0	0.4931129476584022	0.10927960927960928	120.2670273047588	63.98815990883052	7.205332376683984
598	54.0	0.7714285714285715	0.675	38.48528137423857	22.603177149972993	3.3626821158505296
599	212.0	0.4076923076923077	0.21031746031746032	148.57463914933368	44.87610234090915	20.074988000231308
600	100.0	0.6369426751592356	0.2849002849002849	77.55634918610404	42.72713423393425	3.6172918261267566
601	101.0	0.5642458100558659	0.16264090177133655	72.29036790187178	38.64329658911944	6.1753143455754245
602	205.0	0.3173374613003096	0.11351052048726468	139.22539674441617	68.2001715970156	16.476196930291678
603	220.0	0.41198501872659177	0.07328447701532312	154.67514421272202	98.47983606601417	7.445220607784668
604	58.0	0.7435897435897436	0.2196969696969697	49.21320343559643	26.634536817281806	3.110302433530809
605	102.0	0.6710526315789473	0.17708333333333334	67.66904755831213	36.2083737809265	4.536345208261728
606	122.0	0.5258620689655172	0.13555555555555557	82.9116882454314	45.02977035262222	7.403484670666519
607	51.0	0.8095238095238095	0.16666666666666666	31.763455967290597	26.241812521227583	2.8171417286384193
608	191.0	0.44941176470588234	0.11533816425120773	127.40306627407986	65.09336236196565	9.028454192649454
609	123.0	0.7235294117647059	0.3203125	90.89949493661166	54.24884200330448	3.095290386196773
610	168.0	0.4772727272727273	0.12280701754385964	125.15432893255071	67.97504738348482	6.128958722903298
611	125.0	0.4699248120300752	0.2642706131078224	92.11269837220809	48.9217082684755	8.43564034879249
612	134.0	0.6871794871794872	0.1392931392931393	94.46803743153546	49.61573672574604	3.914801776398313
613	119.0	0.5384615384615384	0.18449612403100776	88.52691193458118	50.304942305500404	4.615475915713619
614	101.0	0.8416666666666667	0.18703703703703703	71.84062043356595	38.41279523926865	3.5672637840699695
615	183.0	0.45979899497487436	0.14817813765182186	137.42640687119285	73.92554658964025	7.650017869454952
616	67.0	0.7613636363636364	0.2791666666666667	49.79898987322333	27.661574476988132	3.3369018339880054
617	97.0	0.782258064516129	0.23095238095238096	67.90559159102153	35.44549620810297	3.6939233026562124
618	141.0	0.5300751879699248	0.12771739130434784	100.0477272147525	59.732073373650586	4.995781933123361
619	192.0	0.43636363636363634	0.10158730158730159	127.02438661763951	68.31186568288612	9.22337270989019
620	137.0	0.5524193548387096	0.20296296296296296	99.97665940288701	50.9261061706336	5.576229924039509
621	160.0	0.6274509803921569	0.20833333333333334	106.39087296526012	56.65426184574513	5.018925653339317
622	100.0	0.704225352112676	0.31746031746031744	71.97056274847714	40.10635490791183	3.67373052912385
623	144.0	0.4630225080385852	0.10344827586206896	107.7401153701776	63.18442337218247	6.712764322780631
624	45.0	0.8653846153846154	0.3409090909090909	32.21320343559643	15.957604734331728	3.8964100960577577
625	61.0	0.6421052631578947	0.2606837606837607	45.83452377915607	22.869367894015742	5.469007671876788
626	109.0	0.7622377622377622	0.3784722222222222	77.17766952966369	41.00795775215529	3.5537342505024245
627	146.0	0.7684210526315789	0.15800865800865802	88.71067811865476	47.268101472375804	4.664800171642607
628	147.0	0.6533333333333333	0.17073170731707318	95.53300858899108	49.75604768229724	5.292405751719338
629	227.0	0.38803418803418804	0.11499493414387031	141.3319984622144	68.15025619264149	13.00336186168593
630	122.0	0.6931818181818182	0.18074074074074073	77.36143571373725	39.68858220098423	5.284234535412577
631	172.0	0.5134328358208955	0.16334283000949668	103.39696961966999	50.54059236760062	10.090239656636147
632	123.0	0.7884615384615384	0.1553030303030303	87.1543289325507	46.06546118011268	3.6348815018309484
633	61.0	0.6630434782608695	0.2946859903381642	48.14213562373095	26.292693231547037	3.7761691282053245
634	134.0	0.5630252100840336	0.21036106750392464	101.2842712474619	59.220310960809215	4.138447250630417
635	198.0	0.5963855421686747	0.11366245694603903	142.39696961967	78.51150535957171	4.182629356142528
636	121.0	0.711764705882353	0.20683760683760682	88.35533905932736	46.17824841124828	3.7164288565369485
637	106.0	0.6708860759493671	0.18996415770609318	73.42640687119285	39.34779139765823	4.462311450664106
638	140.0	0.5363984674329502	0.11226944667201283	107.67514421272202	56.95477041244841	5.539528153484816
639	120.0	0.6741573033707865	0.18575851393188855	86.01219330881976	45.44841320580375	4.246248457569603
640	86.0	0.7678571428571429	0.18736383442265794	64.59797974644667	33.05122425764598	3.5077791403552605
641	150.0	0.436046511627907	0.2435064935064935	111.45584412271572	64.76489980688675	6.6243605732117015
642	110.0	0.4888888888888889	0.25462962962962965	79.52691193458118	41.67370917838757	7.103681713990862
643	78.0	0.6190476190476191	0.28888888888888886	57.14213562373095	31.932902492837652	4.127224925868286
644	208.0	0.4397463002114165	0.11791383219954649	134.36753236814712	68.1942311897874	10.281209430075325
645	160.0	0.6584362139917695	0.11088011088011088	108.2670273047588	58.437543323031505	4.754777110319392
646	147.0	0.6150627615062761	0.13920454545454544	105.81118318204308	56.899702704674205	5.055591684282842
647	226.0	0.4162062615101289	0.0837037037037037	158.9177848998413	95.77410240060286	8.245782919438255
648	113.0	0.6420454545454546	0.1712121212121212	77.25483399593904	39.72192478579225	5.359063042076355
649	324.0	0.4976958525345622	0.06340508806262231	208.63455967290594	110.02263264954803	6.931449792116715
650	78.0	0.7722772277227723	0.2422360248447205	55.31980515339464	29.17993707052478	3.8615133962551207
651	191.0	0.4441860465116279	0.1482919254658385	125.81727983645298	59.00493540391631	8.152450137325566
652	63.0	0.875	0.35	43.21320343559642	21.697291308982127	3.7685677169509986
653	62.0	0.8857142857142857	0.26495726495726496	43.2842712474619	22.44483241723661	3.5166539042162897
654	168.0	0.6064981949458483	0.11586206896551725	118.46803743153546	64.88531919650218	4.554246123859376
655	113.0	0.601063829787234	0.15353260869565216	83.91168824543144	43.799361563194196	5.702918586473426
656	141.0	0.4519230769230769	0.13988095238095238	101.94722215136414	53.164092670720144	7.26903329796179
657	625.0	0.35410764872521244	0.09300595238095238	405.7300141024109	123.83305684504631	21.53285608022144
658	111.0	0.6416184971098265	0.1483957219251337	77.91168824543142	43.488511786836035	4.527191962917454
659	109.0	0.8650793650793651	0.16220238095238096	71.15432893255071	39.379793554284234	3.7813718650006334
660	166.0	0.5514950166112956	0.11037234042553191	119.02438661763951	63.491028575918484	5.773313971438655
661	85.0	0.7024793388429752	0.28619528619528617	63.52081528017131	37.87841648982351	3.4425930018531083
662	188.0	0.4253393665158371	0.12239583333333333	137.77564927611036	74.80988384954097	7.477509481267967
663	97.0	0.7348484848484849	0.21651785714285715	71.07716446627535	39.062472606124075	3.8448150261564735
664	37.0	0.7708333333333334	0.4625	30.44974746830583	17.17573196997073	3.089261620281612
665	306.0	0.3958602846054334	0.095625	192.06601717798213	99.71634533359132	13.3961657584411
666	184.0	0.3071786310517529	0.11528822055137844	132.7401153701776	71.22179584881486	15.313477151161731
667	148.0	0.774869109947644	0.13261648745519714	97.78174593052023	52.61808747040461	4.0013854740758825
668	90.0	0.6428571428571429	0.24064171122994651	68.83452377915606	37.06131553909247	3.9609983332202545
669	170.0	0.6093189964157706	0.10416666666666667	118.02438661763951	64.17416580870625	4.575734084347248
670	55.0	0.873015873015873	0.7236842105263158	39.31370849898476	20.17129226015427	3.6610471283639097
671	81.0	0.84375	0.2071611253196931	58.01219330881976	30.15409219684143	3.525513487595996
672	172.0	0.479108635097493	0.11700680272108843	120.71067811865476	63.90893015641827	7.576126965970641
673	127.0	0.6649214659685864	0.15914786967418545	88.74011537017762	45.67134949365928	5.016334269122897
674	53.0	0.7910447761194029	0.37857142857142856	40.27817459305202	23.691460513444014	3.046430119955514
675	106.0	0.7310344827586207	0.2398190045248869	65.80508652763321	32.60862048483981	5.080629246066996
676	132.0	0.5764192139737991	0.15942028985507245	89.53300858899108	43.61621128001193	5.815485303615685
677	157.0	0.5793357933579336	0.10494652406417113	109.81727983645297	60.96003812284999	5.399426264869284
678	113.0	0.6384180790960452	0.12390350877192982	83.49747468305833	51.420181267746905	3.8214983260950084
679	85.0	0.7142857142857143	0.20935960591133004	66.45584412271572	36.860621806654656	3.3387148387037104
680	96.0	0.7218045112781954	0.19047619047619047	66.08326112068524	34.81072540262306	4.343521005008622
681	134.0	0.6090909090909091	0.19142857142857142	100.21320343559643	58.07264538328722	3.9539596797232472
682	118.0	0.5042735042735043	0.17151162790697674	90.49137802864846	52.117368670396594	5.897861182503904
683	142.0	0.5338345864661654	0.1290909090909091	103.5685424949238	56.77686307953839	5.487302882104818
684	52.0	0.7428571428571429	0.28888888888888886	42.384776310850235	22.193052632028905	3.264623099903117
685	106.0	0.8617886178861789	0.20384615384615384	66.87615433949868	34.29315457820583	4.061758609511984
686	135.0	0.6958762886597938	0.14423076923076922	88.46803743153546	48.24845290557129	4.414055292538793
687	384.0	0.22030981067125646	0.05574103643489621	257.8000358937499	132.7361631092367	20.993940831802227
688	142.0	0.6635514018691588	0.1655011655011655	88.22539674441619	45.516754591509034	6.190625281744634
689	172.0	0.5308641975308642	0.09544950055493896	117.74621202458749	68.36491951110668	6.21590345325403
690	64.0	0.8205128205128205	0.2909090909090909	46.87005768508881	24.00493486789368	3.8534451453448773
691	143.0	0.6299559471365639	0.1621315192743764	101.94112549695429	57.93282037466587	3.9516580133135824
692	260.0	0.5895691609977324	0.13052208835341367	175.53300858899104	96.2023983236094	4.819300507056133
693	110.0	0.6285714285714286	0.1746031746031746	80.76955262170047	43.177015700552595	4.708128313781194
694	95.0	0.8636363636363636	0.19791666666666666	62.91168824543142	32.95082327064956	3.8940723931432033
695	65.0	0.7558139534883721	0.24074074074074073	48.526911934581186	25.79097602057098	3.8892956939644088
696	52.0	0.7536231884057971	0.22807017543859648	34.55634918610404	25.085668527150784	2.951141227714553
697	158.0	0.7314814814814815	0.12929623567921442	112.675144212722	60.418352132179685	3.6634457699407514
698	62.0	0.8378378378378378	0.25833333333333336	44.90559159102155	23.280123215206153	3.804874526286262
699	179.0	0.683206106870229	0.1096813725490196	122.50966799187808	65.52384587818784	4.472483250801873
700	77.0	0.7	0.33189655172413796	55.520815280171306	33.94238457318667	3.3450382223081427
701	41.0	0.7884615384615384	0.36607142857142855	34.31370849898476	18.352449936953246	3.072234098928763
702	188.0	0.45742092457420924	0.11823899371069183	127.12489168102785	67.75578346962578	8.825319515067683
703	96.0	0.6906474820143885	0.27586206896551724	64.4558441227157	32.97844008928142	4.600413972907283
704	82.0	0.6119402985074627	0.29818181818181816	57.00609665440988	28.63059178292273	5.475713997723089
705	124.0	0.6424870466321243	0.13963963963963963	88.53300858899107	49.60872631018422	4.444627197637752
706	100.0	0.6410256410256411	0.2403846153846154	68.49137802864844	37.91566825321019	4.496632174473315
707	127.0	0.671957671957672	0.12060778727445394	89.8111831820431	54.17483816519984	3.5806152044303374
708	127.0	0.7134831460674157	0.5772727272727273	87.31370849898475	50.17112889309619	4.273885399594969
709	144.0	0.582995951417004	0.1496881496881497	95.63961030678928	49.59166714254121	6.964407352853832
710	191.0	0.6821428571428572	0.19254032258064516	126.9594154601839	45.844702791826975	8.177435180169066
711	107.0	0.5846994535519126	0.23777777777777778	70.14823227814082	35.3384920149225	6.233368502552928
712	153.0	0.4766355140186916	0.11217008797653959	111.12489168102785	59.164070172541685	7.314038115824981
713	230.0	0.39316239316239315	0.09913793103448276	165.71677477306463	75.93899912759316	8.629814859258314
714	200.0	0.4149377593360996	0.18867924528301888	125.63961030678928	63.945104336972456	9.865780827370207
715	102.0	0.8095238095238095	0.19428571428571428	65.49747468305833	34.66793163717865	4.18836913734512
716	199.0	0.34488734835355284	0.08504273504273505	142.40306627407986	77.47212495374718	13.893065013493427
717	343.0	0.6007005253940455	0.06496212121212121	231.87110370561533	122.4065401545803	4.773392710675865
718	92.0	0.6301369863013698	0.2697947214076246	68.21320343559643	37.26332774254869	4.02358137281807
719	44.0	0.8627450980392157	0.2603550295857988	32.248737341529164	18.758512798724784	3.0264698733223705
720	143.0	0.6713615023474179	0.14444444444444443	89.5035713374682	46.911731405436534	5.449047331503535
721	66.0	0.8461538461538461	0.42857142857142855	46.34924240491749	24.14139261523214	3.6017741353788493
722	159.0	0.6824034334763949	0.11656891495601172	109.98885271170677	59.48830848100713	4.081976697727795
723	348.0	0.5304878048780488	0.06762534006995725	215.67009357883867	117.76296782937804	5.841981758161325
724	151.0	0.571969696969697	0.17476851851851852	91.39696961966999	47.66986107633696	7.477881803173896
725	164.0	0.33537832310838445	0.13945578231292516	110.32590180780451	58.98000728527055	14.453437989601625
726	170.0	0.648854961832061	0.10855683269476372	132.05382386916236	70.33538824887115	4.1011784978063535
727	91.0	0.7520661157024794	0.17738791423001948	66.66904755831214	35.67039088177583	3.6160331754110433
728	52.0	0.8524590163934426	0.27807486631016043	35.42031021678297	21.010898391390487	3.3001910873008877
729	41.0	0.8541666666666666	0.41836734693877553	31.556349186104047	16.044454818211246	3.4025364418872477
730	137.0	0.6884422110552764	0.1630952380952381	86.77564927611034	45.98691326366762	5.119064444548436
731	49.0	0.765625	0.4298245614035088	36.89949493661167	21.62930871607954	3.3045715510354152
732	157.0	0.5547703180212014	0.13687881429816914	103.29646455628166	53.15228979192651	6.996929023108022
733	100.0	0.7874015748031497	0.1736111111111111	74.2193000900063	39.93593879748175	3.4305673530470626
734	103.0	0.64375	0.2861111111111111	74.59188309203678	41.386868758887076	4.426879394577321
735	73.0	0.7604166666666666	0.228125	52.148232278140824	27.097644447148987	3.881560427614116
736	34.0	0.85	0.40476190476190477	27.556349186104047	14.099049821491032	3.200158681128312
737	115.0	0.5609756097560976	0.18699186991869918	90.31980515339464	47.318827806176884	5.093899951206062
738	116.0	0.6628571428571428	0.16642754662840745	88.76955262170047	47.17790799136946	3.8279035199591505
739	107.0	0.6903225806451613	0.1917562724014337	75.84062043356595	39.48136142796671	4.52490724969597
740	119.0	0.6467391304347826	0.1739766081871345	85.08326112068524	44.358600013770214	4.763802611997873
741	93.0	0.768595041322314	0.20666666666666667	68.94112549695427	36.503791902116234	3.4360097845345967
742	133.0	0.6073059360730594	0.2841880341880342	100.97056274847714	59.745482306567865	4.002555413807422
743	166.0	0.39243498817966904	0.12749615975422426	108.63961030678927	55.23982180862931	12.269416074171463
744	170.0	0.6343283582089553	0.12318840579710146	114.53910524340094	60.90235161451177	4.636820852131615
745	52.0	0.896551724137931	0.33766233766233766	34.834523779156065	17.95974763341217	3.818067896061918
746	157.0	0.5814814814814815	0.15575396825396826	109.1543289325507	56.65859453618577	5.650878965739225
747	96.0	0.6193548387096774	0.2909090909090909	67.38477631085023	38.29910495949885	4.434486488016666
748	46.0	0.8070175438596491	0.2358974358974359	25.763455967290593	20.933838215815623	3.0653459381298367
749	85.0	0.6640625	0.18162393162393162	62.63351365237939	33.83860370141631	4.52887390489655
750	73.0	0.9240506329113924	0.8390804597701149	54.242640687119284	30.826512355493556	3.070161567148441
751	148.0	0.5849802371541502	0.15289256198347106	101.94722215136417	53.610891319597066	6.043259101428659
752	107.0	0.781021897810219	0.2891891891891892	76.62741699796952	41.19336132925054	3.4540498593421973
753	72.0	0.6486486486486487	0.16941176470588235	38.970562748477136	32.94958296605059	3.973793118176276
754	196.0	0.6712328767123288	0.11421911421911422	127.68124086713188	66.36994405929444	4.641333765970952
755	88.0	0.6376811594202898	0.25507246376811593	67.80508652763321	28.07382858032986	6.725170439274817
756	160.0	0.44321329639889195	0.10818120351588911	118.84671708797583	66.88852370742089	8.361953793330423
757	150.0	0.672645739910314	0.1450676982591876	106.32590180780453	57.678707648291365	3.995788841690702
758	109.0	0.5989010989010989	0.3096590909090909	82.5208152801713	51.95019019551445	3.6839713471636975
759	260.0	0.273972602739726	0.06950013365410318	188.13098833543773	108.64080501937656	16.55756623223064
760	72.0	0.7422680412371134	0.17647058823529413	51.941125496954285	31.86565303784699	3.1904422739882854
761	55.0	0.873015873015873	0.25462962962962965	43.248737341529164	23.021605859601056	3.180058345879653
762	83.0	0.7757009345794392	0.27666666666666667	57.8700576850888	29.703127348791213	4.034727153694199
763	206.0	0.7006802721088435	0.10640495867768596	128.06601717798213	69.66739453047845	4.7789477322131795
764	345.0	0.3317307692307692	0.09324324324324325	259.7584053334072	88.12400376342478	16.924615919125753
765	101.0	0.7481481481481481	0.1753472222222222	71.59797974644665	40.337399595664714	3.732524507402576
766	96.0	0.7441860465116279	0.2	68.97665940288701	36.526196619451134	3.8365225089449115
767	129.0	0.6515151515151515	0.13043478260869565	93.46194077712559	53.36637725480109	3.6111681300320346
768	126.0	0.65625	0.1875	94.18376618407356	50.09331006946685	4.108587699612953
769	186.0	0.4460431654676259	0.1099290780141844	129.57463914933368	66.3155561215195	9.066693471345145
770	223.0	0.4734607218683652	0.11798941798941799	161.08935777509512	84.59376044399788	8.175881566892441
771	133.0	0.7556818181818182	0.14745011086474502	92.32590180780451	49.21458282728582	3.941172682218736
772	153.0	0.7574257425742574	0.15	93.53910524340094	50.058008376370694	4.542692528844598
773	289.0	0.4991364421416235	0.0699080793420416	194.7289680818844	106.70846163969851	5.973827025935479
774	193.0	0.8177966101694916	0.10758082497212931	121.48023074035522	65.62922633526344	3.9253703797440407
775	32.0	0.8648648648648649	0.41025641025641024	26.31370849898476	14.27166998655256	2.9220174186569863
776	89.0	0.7007874015748031	0.2908496732026144	64.69238815542512	38.885675892722595	3.1932507236885703
777	33.0	0.8918918918918919	0.4125	24.14213562373095	12.922469385397712	3.2574920140027546
778	105.0	0.6730769230769231	0.17647058823529413	75.80508652763321	42.14680891533545	4.3840014570871375
779	137.0	0.7569060773480663	0.14315569487983282	85.71067811865474	45.724128597848534	4.192094637054203
780	80.0	0.7692307692307693	0.17204301075268819	63.077164466275356	35.134279760033685	3.088670546317145
781	192.0	0.5871559633027523	0.09365853658536585	127.92388155425118	71.10513479383036	5.117024320409158
782	75.0	0.7575757575757576	0.2976190476190476	55.55634918610404	32.726064579207936	3.0906718869959326
783	55.0	0.7971014492753623	0.2864583333333333	39.2842712474619	20.295352749459063	3.848985558933094
784	73.0	0.8488372093023255	0.20448179271708683	53.56244584051392	28.073404510693212	3.4289731291951795
785	220.0	0.49217002237136465	0.1608187134502924	157.08326112068522	87.41726474932622	5.96762662604322
786	128.0	0.6183574879227053	0.14512471655328799	87.63351365237939	51.20854980676637	4.174987477577376
787	193.0	0.272984441301273	0.16782608695652174	133.53910524340094	55.41156700693977	23.916018010482496
788	53.0	0.7681159420289855	0.4015151515151515	44.071067811865476	24.1865556477626	3.1696185502138414
789	151.0	0.592156862745098	0.13073593073593073	100.95331880577405	52.15842487417927	6.161980993417029
790	112.0	0.6829268292682927	0.17777777777777778	74.32590180780451	39.34987958000665	4.955437901344119
791	46.0	0.7540983606557377	0.23232323232323232	35.17766952966369	21.423244163309324	2.81522945630257
792	180.0	0.6870229007633588	0.10084033613445378	117.8528137423857	66.05921759179333	4.348636034164371
793	121.0	0.7857142857142857	0.1697054698457223	77.39696961966999	40.97535289965004	4.042906262143158
794	126.0	0.7078651685393258	0.15	90.08326112068522	48.24229874964072	3.675600552010065
795	97.0	0.7348484848484849	0.19019607843137254	67.63351365237939	34.69839304421079	4.0579090550772605
796	210.0	0.3977272727272727	0.09510869565217392	145.095454429505	73.56393501679618	12.36807682119651
797	123.0	0.825503355704698	0.15870967741935485	81.05382386916237	42.56392296570234	3.8119872618409443
798	136.0	0.6017699115044248	0.3333333333333333	100.55634918610406	58.14601718919842	4.4106892707524805
799	69.0	0.6831683168316832	0.21904761904761905	44.2842712474619	27.812160609379994	4.510786660674947
800	64.0	0.7901234567901234	0.26666666666666666	49.17766952966368	27.333345087733395	3.13335823277211
801	135.0	0.5232558139534884	0.3375	100.00609665440987	54.92134628029433	6.342675792051252
802	241.0	0.6965317919075145	0.1010482180293501	142.79393923934	76.72781184824204	5.3310247269723074
803	264.0	0.35918367346938773	0.11	177.78174593052023	97.46325622770182	11.283169792722104
804	256.0	0.37925925925925924	0.10158730158730159	158.16652224137044	81.51384696859107	12.482696165211747
805	297.0	0.594	0.07417582417582418	196.59292911256333	105.30892846122973	5.232526659218498
806	101.0	0.6870748299319728	0.21581196581196582	75.62741699796952	44.610559358482526	3.2241587863450953
807	190.0	0.37328094302554027	0.15079365079365079	131.49747468305833	74.179433022507	10.971030809063105
808	59.0	0.7468354430379747	0.28095238095238095	41.90559159102155	20.812234487438452	4.799213754743714
809	147.0	0.6074380165289256	0.13867924528301886	110.42640687119284	63.373810913346325	3.7011791362467754
810	81.0	0.6864406779661016	0.3375	54.00609665440987	27.24104526646306	5.137952063179142
811	167.0	0.7324561403508771	0.11997126436781609	117.95331880577403	61.883124393930586	3.6857757272165244
812	360.0	0.3488372093023256	0.06470165348670022	252.4213562373095	133.51116696919755	10.381769311115741
813	104.0	0.8062015503875969	0.21052631578947367	64.87615433949868	34.09946347301902	4.163126281779109
814	170.0	0.6463878326996197	0.13343799058084774	116.05382386916236	60.77646679640361	4.642921912336712
815	112.0	0.7044025157232704	0.1728395061728395	82.01219330881975	43.77838146833534	4.078690227523631
816	196.0	0.6782006920415224	0.08691796008869179	130.16652224137047	76.63232302085692	3.900920517030531
817	200.0	0.5025125628140703	0.12987012987012986	149.9116882454314	81.35848904372459	5.656488356051423
818	141.0	0.7921348314606742	0.17279411764705882	86.81118318204308	45.36947167980679	4.246901107379071
819	74.0	0.6981132075471698	0.296	55.62741699796951	28.78401051022824	4.283688430905622
820	114.0	0.7916666666666666	0.2714285714285714	77.45584412271572	39.207445096038455	3.988905556556748
821	131.0	0.7119565217391305	0.14886363636363636	88.49747468305833	50.13137557651375	3.964340365152813
822	167.0	0.5604026845637584	0.09811985898942421	107.5035713374682	59.434577365289	7.287964969444576
823	61.0	0.7349397590361446	0.25416666666666665	44.07716446627536	23.829229207956214	4.105322459349605
824	108.0	0.5934065934065934	0.19285714285714287	72.0477272147525	36.59490001730311	6.122647964795808
825	115.0	0.7419354838709677	0.15625	79.9827560572969	42.13646315540339	3.986146161663151
826	123.0	0.7639751552795031	0.1553030303030303	84.60407640085654	44.81587905354264	3.9268464448991005
827	48.0	0.7741935483870968	0.3333333333333333	37.3492424049175	20.48101984665608	3.4339066571135475
828	154.0	0.6416666666666667	0.30434782608695654	99.11269837220809	52.649859162473234	5.067573831236571
829	207.0	0.47586206896551725	0.10454545454545454	141.6812408671319	75.01384921981774	7.660771103983734
830	139.0	0.6017316017316018	0.22063492063492063	98.73401871576775	51.999162500029776	5.55881383353257
831	103.0	0.7202797202797203	0.3301282051282051	75.76345596729058	41.85667121206625	3.4624463804553587
832	189.0	0.6428571428571429	0.12442396313364056	122.61017305526643	65.53626318906316	4.978093608059208
833	119.0	0.5509259259259259	0.22666666666666666	80.76955262170048	42.17593542879216	6.722385789759023
834	183.0	0.4753246753246753	0.10892857142857143	126.5035713374682	72.43587312416446	7.390491803392
835	227.0	0.6776119402985075	0.13909313725490197	129.19595949289334	67.67593660723615	5.280743516315043
836	161.0	0.4820359281437126	0.17869034406215317	110.14823227814082	64.18568535184001	5.994992534819327
837	234.0	0.5969387755102041	0.1142578125	149.23149339882607	80.08721819721421	6.0496103449262995
838	137.0	0.49280575539568344	0.17631917631917632	91.84062043356595	47.30454654368002	8.985229496106733
839	394.0	0.2640750670241287	0.05267379679144385	265.1848122046001	136.14011991909888	17.434464773431152
840	105.0	0.6140350877192983	0.4268292682926829	79.5208152801713	45.866925406237755	4.374760846426741
841	130.0	0.49429657794676807	0.18207282913165265	90.80508652763321	49.14709893026486	7.876882015687043
842	190.0	0.5993690851735016	0.10052910052910052	125.99494936611666	67.02562546618161	5.703426739559188
843	182.0	0.5852090032154341	0.1148989898989899	122.2670273047588	65.7791821942021	5.242557490232683
844	204.0	0.5964912280701754	0.1118421052631579	135.2670273047588	71.25974030048731	5.436520580395138
845	82.0	0.6212121212121212	0.4019607843137255	60.48528137423857	38.870147539898646	4.1761233450651405
846	118.0	0.7763157894736842	0.16857142857142857	75.15432893255071	39.55045865707317	4.128251571530022
847	65.0	0.8904109589041096	0.3385416666666667	40.8700576850888	20.697303902867148	4.054694324311374
848	46.0	0.8518518518518519	0.3194444444444444	35.21320343559643	18.209405184483572	3.239900910887398
849	131.0	0.6036866359447005	0.17328042328042328	93.84062043356595	50.3530800672917	4.987110659335865
850	95.0	0.7661290322580645	0.42792792792792794	70.86396103067892	41.08776388807632	3.1775497026159534
851	122.0	0.7672955974842768	0.24206349206349206	91.04163056034261	49.01443871546373	3.3290005002883296
852	199.0	0.7453183520599251	0.23550295857988165	137.90559159102156	74.23984325538822	3.6477051287508955
853	39.0	0.7647058823529411	0.22807017543859648	34.071067811865476	22.59928719505343	2.295558412829075
854	65.0	0.6770833333333334	0.2	49.00609665440987	30.068393064034154	3.9465840329316864
855	111.0	0.7872340425531915	0.18226600985221675	74.91168824543142	38.94888601275694	3.8162623003203695
856	201.0	0.6203703703703703	0.14285714285714285	142.87615433949867	76.50781603974447	4.526618442821534
857	283.0	0.3628205128205128	0.10458240946045824	185.05992052357226	95.30547766700033	15.406766941448938
858	72.0	0.7578947368421053	0.2857142857142857	49.8700576850888	24.778143843077405	4.509291645985586
859	173.0	0.667953667953668	0.12987987987987987	106.85281374238569	57.10031229124894	5.733479738826966
860	42.0	0.7777777777777778	0.525	36.03553390593274	22.365444462070027	2.7029924880543814
861	147.0	0.6621621621621622	0.166289592760181	90.22539674441619	46.62451501519131	5.612961169371807
862	166.0	0.4598337950138504	0.12818532818532818	110.675144212722	56.47815493845363	8.674129027465986
863	198.0	0.45	0.09397247271001424	137.095454429505	71.35558460525074	10.245600128457939
864	92.0	0.5257142857142857	0.3108108108108108	69.3492424049175	43.868750235588244	5.095093123741579
865	130.0	0.7142857142857143	0.20634920634920634	94.76955262170046	50.01367809052582	3.9205185110798695
866	141.0	0.6351351351351351	0.17279411764705882	105.01219330881975	56.586685991653276	4.028067117307826
867	202.0	0.543010752688172	0.10767590618336886	145.43250352560273	82.4797510397143	5.91845634762885
868	149.0	0.5302491103202847	0.3104166666666667	101.87005768508881	52.52192479218643	7.2997371272083855
869	101.0	0.5343915343915344	0.19423076923076923	80.6274169979695	42.920503855446135	5.550168551433734
870	100.0	0.5813953488372093	0.4166666666666667	67.79898987322332	35.764151122642666	6.363575604703476
871	193.0	0.6632302405498282	0.08554964539007093	134.55129855222071	75.3309749692229	4.4562886527628445
872	164.0	0.6074074074074074	0.13666666666666666	108.9827560572969	58.17749651900275	5.581846204465976
873	62.0	0.8157894736842105	0.36257309941520466	43.17766952966368	22.27604100383877	3.7793809546390618
874	122.0	0.8299319727891157	0.16180371352785147	79.05382386916237	43.03311360058277	3.928081257296966
875	218.0	0.6089385474860335	0.08934426229508197	154.0660171779821	81.93484573911148	4.948362250034253
876	108.0	0.7152317880794702	0.2926829268292683	76.3492424049175	45.69409964166115	3.296485437095488
877	195.0	0.6331168831168831	0.10833333333333334	130.50966799187808	70.52185857967494	4.615356867033911
878	92.0	0.6344827586206897	0.19126819126819128	73.76345596729058	43.49042625745125	3.5621179175621087
879	280.0	0.5223880597014925	0.07440871644964124	175.69343417595167	99.27630142400814	6.576368954879579
880	175.0	0.3645833333333333	0.10516826923076923	126.36753236814712	68.53334342281028	9.26948243416375
881	154.0	0.6390041493775933	0.13006756756756757	102.36753236814714	53.639350287003055	5.665559335681455
882	168.0	0.5316455696202531	0.23076923076923078	115.28427124746189	63.985570677839206	6.10414426687228
883	36.0	0.782608695652174	0.5538461538461539	26.86396103067893	14.46741319261571	3.6178746858513446
884	145.0	0.6807511737089202	0.15675675675675677	94.81118318204308	49.43211272979775	4.555142437535393
885	49.0	0.8032786885245902	0.3202614379084967	35.79898987322333	19.015694800532856	3.591746656942354
886	105.0	0.7291666666666666	0.20588235294117646	72.63351365237939	37.37837096069061	4.2252095407055945
887	162.0	0.7714285714285715	0.12272727272727273	107.78174593052023	57.907100887869426	3.761334780004208
888	250.0	0.27839643652561247	0.17088174982911825	166.46803743153546	91.30582833588701	18.931722792644383
889	160.0	0.418848167539267	0.26936026936026936	130.83452377915606	77.47462639875677	5.747152718786975
890	397.0	0.35701438848920863	0.06634358288770054	237.7056274847714	123.6150251288929	12.432071151254286
891	128.0	0.6881720430107527	0.16473616473616473	86.32590180780451	44.62744321763087	4.431631610607103
892	102.0	0.6257668711656442	0.2073170731707317	83.21320343559643	47.36507864343645	3.8784291217063007
893	118.0	0.6742857142857143	0.18294573643410852	88.698484809835	50.11950353264688	3.566864800268198
894	79.0	0.6929824561403509	0.32916666666666666	55.79898987322333	29.19507147447787	4.399930258773485
895	148.0	0.6548672566371682	0.13261648745519714	93.22539674441617	50.22120294470385	5.041343366485271
896	146.0	0.5725490196078431	0.14484126984126985	102.22539674441617	52.924510711170115	6.1409381925655415
897	176.0	0.6308243727598566	0.2328042328042328	126.42031021678298	73.14192347134349	3.6688522991699544
898	135.0	0.7541899441340782	0.14835164835164835	89.29646455628165	46.62783740470122	4.127920899166051
899	75.0	0.7978723404255319	0.32608695652173914	53.21320343559642	27.25879004747765	3.699052225875657
900	67.0	0.8481012658227848	0.2326388888888889	45.35533905932738	24.169655389324756	3.7346494989336967
901	166.0	0.8137254901960784	0.14310344827586208	101.78174593052023	53.717460338742534	4.110234541764214
902	124.0	0.5299145299145299	0.20394736842105263	85.18376618407356	45.32121380724744	7.1285259968607715
903	128.0	0.6918918918918919	0.2077922077922078	94.69848480983498	50.86655137009277	3.5886113471945316
904	97.0	0.6879432624113475	0.17290552584670232	74.76955262170047	40.04085528651223	4.0778858895171375
905	221.0	0.38235294117647056	0.1154649947753396	148.78174593052023	76.59352360848588	11.54877297229264
906	71.0	0.8160919540229885	0.4551282051282051	51.48528137423857	27.76411122485511	3.4340199908510103
907	45.0	0.7894736842105263	0.47368421052631576	32.65685424949238	20.437622928050132	3.1216272527578677
908	138.0	0.5307692307692308	0.1760204081632653	103.76955262170046	58.30517520427506	5.419353129215461
909	116.0	0.7483870967741936	0.1858974358974359	72.94722215136416	37.79949327922791	4.910346872343253
910	46.0	0.7666666666666667	0.5227272727272727	40.621320343559645	25.152371535873616	2.4932767964581433
911	54.0	0.7605633802816901	0.40601503759398494	40.17766952966369	21.409539965691536	3.7569205050214767
912	228.0	0.5615763546798029	0.1043956043956044	137.095454429505	76.93041893039253	6.799142662678882
913	231.0	0.39419795221843	0.1043360433604336	150.23149339882605	75.0584417304308	11.459829001613857
914	186.0	0.6763636363636364	0.10928319623971798	122.16652224137047	65.66219409793425	4.457831959902347
915	185.0	0.5967741935483871	0.13214285714285715	129.43250352560273	67.58309883411626	5.35854181523944
916	172.0	0.6323529411764706	0.10336538461538461	128.4386001800126	66.8703090903573	4.445383859730149
917	290.0	0.2857142857142857	0.12854609929078015	203.5035713374682	110.60658633643821	16.0620538864853
918	171.0	0.5377358490566038	0.1062111801242236	118.81727983645295	65.68089955356328	5.619631301788136
919	169.0	0.6213235294117647	0.25606060606060604	119.52691193458118	63.72651667579933	4.327553367062906
920	105.0	0.6774193548387096	0.24475524475524477	77.79898987322332	44.67925614768937	3.5980704419851604
921	109.0	0.7124183006535948	0.36824324324324326	76.76345596729058	42.569109125809355	3.6032363944148593
922	134.0	0.5955555555555555	0.22408026755852842	96.8700576850888	54.49121667052446	4.533017791387232
923	199.0	0.5223097112860893	0.12178702570379436	123.43860018001261	63.38463236146336	8.757642486381013
924	175.0	0.7882882882882883	0.1371473354231975	110.36753236814714	58.317117457770436	4.1127158696862685
925	105.0	0.6	0.12338425381903642	79.2193000900063	47.36059785206794	4.20857375961999
926	111.0	0.5211267605633803	0.1778846153846154	83.35533905932738	45.273952825011676	6.571927018452252
927	42.0	0.8235294117647058	0.35294117647058826	34.69238815542512	19.622176473572843	2.767586104097309
928	115.0	0.8156028368794326	0.21821631878557876	73.84062043356595	37.397112484274935	4.099622435600705
929	163.0	0.5275080906148867	0.09908814589665653	118.95331880577403	65.44094511620798	5.688509228298374
930	68.0	0.7010309278350515	0.25757575757575757	49.00609665440987	27.25148775811158	4.054560389511271
931	126.0	0.7	0.1875	92.5269119345812	50.749763918465995	3.6478781854656033
932	122.0	0.6971428571428572	0.16531165311653118	93.97665940288701	52.1613630033188	3.4207820863250435
933	40.0	0.9302325581395349	0.36363636363636365	29.798989873223334	15.054822302403235	3.6840637132197003
934	106.0	0.5698924731182796	0.4092664092664093	76.00609665440987	41.824317623910794	5.74993964775476
935	68.0	0.7472527472527473	0.39080459770114945	52.44974746830583	32.12664937394171	2.875055348407417
936	129.0	0.4271523178807947	0.1385606874328679	95.1126983722081	57.33817294839655	7.494118887367723
937	96.0	0.6713286713286714	0.210989010989011	76.49137802864846	40.55171036948848	3.48006744797475
938	196.0	0.5490196078431373	0.09664694280078895	135.373629022557	72.06599963953511	6.375993670647651
939	208.0	0.7298245614035088	0.08919382504288165	137.72287142747453	77.3147775381803	4.018157341727178
940	302.0	0.4200278164116829	0.08638443935926773	212.2020561473032	112.75690044572644	7.91356602133697
941	143.0	0.6137339055793991	0.2803921568627451	103.38477631085023	57.485836670211405	5.091315543118288
942	102.0	0.6219512195121951	0.3148148148148148	73.59188309203678	40.90945544000462	4.673466829194765
943	79.0	0.7117117117117117	0.398989898989899	60.86396103067893	38.137701147041376	3.021150761543379
944	110.0	0.6432748538011696	0.25462962962962965	77.8700576850888	42.406249010085276	4.597983237607505
945	211.0	0.5314861460957179	0.1435374149659864	149.70458146424488	82.80671710523472	5.584777294198249
946	125.0	0.6648936170212766	0.1388888888888889	87.60407640085653	46.67650728909355	4.725920364457841
947	108.0	0.6923076923076923	0.46153846153846156	75.31370849898477	44.3156105687311	4.045071020874096
948	129.0	0.7329545454545454	0.24807692307692308	86.698484809835	44.66618466734332	4.126773396049202
949	123.0	0.4880952380952381	0.205685618729097	95.8700576850888	51.45932334323358	6.261316666637806
950	120.0	0.6153846153846154	0.21428571428571427	86.5269119345812	45.974883048810426	4.581377253304122
951	75.0	0.8426966292134831	0.25510204081632654	50.526911934581186	26.497408834459147	3.6507096043210425
952	152.0	0.5507246376811594	0.2753623188405797	114.97056274847714	48.19356257752267	8.04663001624046
953	67.0	0.6767676767676768	0.5153846153846153	48.72792206135785	28.103674949722752	4.653307364005995
954	152.0	0.8837209302325582	0.16907675194660735	86.12489168102785	46.42750124723698	4.333277528937546
955	122.0	0.7484662576687117	0.23461538461538461	87.698484809835	46.01828244245938	3.580085080501854
956	159.0	0.5129032258064516	0.1502835538752363	106.15432893255073	56.798623416141794	6.50207390248721
957	201.0	0.46420323325635104	0.17033898305084746	131.3259018078045	68.24043449249137	8.762001276868387
958	148.0	0.6218487394957983	0.11212121212121212	114.42640687119285	67.22527205014674	3.5604218122785904
959	60.0	0.8	0.4	45.071067811865476	26.94305030295013	2.939545757695833
960	195.0	0.4642857142857143	0.203125	137.25483399593904	75.84972614215583	6.968500847009138
961	61.0	0.8243243243243243	0.27232142857142855	42.2842712474619	22.38100513005703	4.173738215387494
962	103.0	0.553763440860215	0.20766129032258066	71.97665940288701	38.219579597775756	5.6114234553860545
963	200.0	0.5012531328320802	0.0966183574879227	133.54520189781084	71.57057924675011	8.315803405844894
964	42.0	0.8235294117647058	0.23333333333333334	36.27817459305203	23.506560123149836	2.465986001390684
965	143.0	0.5521235521235521	0.19066666666666668	103.11269837220809	60.408638067138305	4.856171555549362
966	106.0	0.7412587412587412	0.14133333333333334	72.36143571373725	42.41527888830511	3.8333022091850304
967	96.0	0.64	0.3516483516483517	74.48528137423858	44.518452579461	3.627836734849962
968	194.0	0.7106227106227107	0.0939922480620155	130.89444430272832	73.4505732517943	3.974170457556552
969	217.0	0.5398009950248757	0.07954545454545454	156.89444430272832	85.69719378917104	6.797332030866299
970	132.0	0.7586206896551724	0.11806797853309481	98.22539674441617	54.20669612523592	3.3248555631775365
971	51.0	0.7727272727272727	0.40476190476190477	39.69238815542512	21.814785170169497	3.3505610113030557
972	111.0	0.8161764705882353	0.16818181818181818	77.49747468305833	40.90625012839223	3.5615595515751486
973	151.0	0.6741071428571429	0.1776470588235294	108.76955262170047	60.221365903165065	3.9399855689498158
974	84.0	0.56	0.24633431085043989	62.21320343559643	35.775429368535214	5.408552518467457
975	144.0	0.5901639344262295	0.20899854862119013	105.2842712474619	60.28925135216596	4.28194224856485
976	158.0	0.683982683982684	0.11253561253561253	106.8528137423857	58.31937919025269	4.676952559373327
977	172.0	0.5752508361204013	0.11944444444444445	111.19595949289332	58.238382737225244	7.338292593375937
978	158.0	0.5663082437275986	0.15991902834008098	113.66904755831214	60.62617455660619	5.286083964143994
979	285.0	0.6985294117647058	0.08870214752567694	168.93607486307093	92.70797051702765	4.641777258726295
980	87.0	0.54375	0.21323529411764705	68.3492424049175	37.68153136277928	5.822874464737044
981	107.0	0.47555555555555556	0.208984375	75.18376618407356	39.07380953082296	9.156356188859041
982	132.0	0.5866666666666667	0.1375	100.04772721475248	56.16934799193624	4.484514009750983
983	108.0	0.8	0.1833616298811545	76.08326112068524	38.913713149966625	3.7310132331998296
984	113.0	0.6174863387978142	0.3138888888888889	83.21320343559643	44.19458151038241	5.167101556499326
985	85.0	0.7870370370370371	0.18162393162393162	56.76955262170047	31.957462823255455	3.856098706709357
986	154.0	0.6062992125984252	0.13508771929824562	100.9177848998413	53.404019634498205	6.186118804450988
987	202.0	0.554945054945055	0.09619047619047619	136.06601717798213	71.81236136065087	7.268779995993847
988	140.0	0.56	0.12173913043478261	102.32590180780451	57.781613055605106	4.9983965631520535
989	119.0	0.5776699029126213	0.2531914893617021	90.9350288425444	52.900702977130585	4.693672326795591
990	60.0	0.7894736842105263	0.45454545454545453	42.89949493661167	24.512579588815587	3.373112264130252
991	325.0	0.5030959752321982	0.06497401039584166	213.39191898578665	117.50867288767496	6.823218606620556
992	79.0	0.8144329896907216	0.28214285714285714	50.526911934581186	25.85274298383537	4.363882150716114
993	121.0	0.605	0.17285714285714285	79.15432893255071	40.596262272027445	6.053044163814361
994	157.0	0.7476190476190476	0.13350340136054423	104.12489168102783	54.836668164299006	3.9014895950544983
995	155.0	0.7110091743119266	0.1272577996715928	104.95331880577403	55.77760122058462	4.390711650700823
996	271.0	0.5599173553719008	0.11581196581196582	190.63961030678928	102.57144846274872	4.477608978286047
997	103.0	0.7744360902255639	0.5024390243902439	77.89949493661166	42.73556018882595	3.221738095471481
998	32.0	0.8648648648648649	0.49230769230769234	25.65685424949238	14.208082583546732	2.889487722610361
999	153.0	0.47962382445141066	0.14166666666666666	116.08326112068522	63.011411887818184	6.877606691626343
1000	138.0	0.40233236151603496	0.28991596638655465	86.32590180780453	40.52524243705034	13.254050656068738
1001	129.0	0.5633187772925764	0.30714285714285716	91.45584412271572	48.206643504702136	6.049695870840333
1002	231.0	0.4762886597938144	0.09755067567567567	153.75230867899737	80.9985697030044	7.602928476552618
1003	159.0	0.4676470588235294	0.10460526315789474	117.61017305526642	61.888992742127414	7.507555648180883
1004	78.0	0.75	0.4642857142857143	55.31370849898476	29.21132484428318	4.125928642930083
1005	36.0	0.8780487804878049	0.4	26.384776310850235	13.473828860543884	3.5727549331130017
1006	41.0	0.82	0.3416666666666667	30.14213562373095	17.73821700381948	3.1502962760881217
1007	62.0	0.8266666666666667	0.2683982683982684	48.04163056034261	25.571660730110025	3.25097455515406
1008	127.0	0.5799086757990868	0.14399092970521543	92.84062043356595	52.210120399415544	5.234583696303804
1009	127.0	0.6902173913043478	0.1383442265795207	86.67514421272202	47.22763422433274	4.212657826654907
1010	82.0	0.7663551401869159	0.22777777777777777	58.97665940288701	30.634642716213367	3.697103787744619
1011	131.0	0.48698884758364314	0.1190909090909091	91.46194077712559	56.49226541445711	5.106428497345082
1012	173.0	0.6628352490421456	0.11033163265306123	118.36753236814712	64.23230260254667	4.166110811486458
1013	216.0	0.6728971962616822	0.08823529411764706	139.96551211459382	78.32969216390609	4.346110995926867
1014	147.0	0.5287769784172662	0.1346153846153846	112.59797974644667	64.16730272582396	4.802720368779201
1015	160.0	0.3611738148984199	0.1871345029239766	105.49747468305833	52.29048045693365	14.413904869362797
1016	97.0	0.6689655172413793	0.5105263157894737	76.48528137423857	45.890258694722874	3.708558988938151
1017	78.0	0.7878787878787878	0.24375	52.94112549695428	26.652341381702943	4.536777536776624
1018	204.0	0.5878962536023055	0.18246869409660108	136.6812408671319	49.03202005839762	9.422246703691183
1019	120.0	0.7228915662650602	0.23715415019762845	86.17766952966369	51.900063609605255	3.1846956224757936
1020	162.0	0.5276872964169381	0.17016806722689076	116.94112549695427	66.37395848199698	5.100468822230732
1021	40.0	0.8163265306122449	0.38095238095238093	30.31370849898476	16.438660477928842	3.579167737251244
1022	66.0	0.7096774193548387	0.45517241379310347	55.071067811865476	32.11708404297347	3.3002186804432485
1023	38.0	0.8085106382978723	0.3877551020408163	30.899494936611664	16.44966135031318	3.0364907062336433
1024	49.0	0.7	0.266304347826087	42.65685424949238	27.153579693670846	2.7177472692102604
1025	311.0	0.6673819742489271	0.16274201988487702	209.18481220460012	62.78990106481197	9.798565151680362
1026	138.0	0.5307692307692308	0.115	94.14823227814082	61.57307773442299	5.500220233074438
1027	153.0	0.5387323943661971	0.3355263157894737	110.34924240491749	65.25201228250131	4.9136247818869725
1028	94.0	0.706766917293233	0.17279411764705882	72.66295090390226	42.40096898959744	3.290014227048135
1029	137.0	0.5546558704453441	0.19187675070028012	101.11269837220809	56.98813777500161	5.020378093357304
1030	100.0	0.704225352112676	0.47619047619047616	71.14213562373095	39.24555688323875	4.360810122496914
1031	123.0	0.6373056994818653	0.358600583090379	91.93502884254441	57.120631249695116	3.434604823118826
1032	102.0	0.5151515151515151	0.20816326530612245	72.31980515339464	39.918720795790954	6.396467745272093
1033	101.0	0.7318840579710145	0.17719298245614035	72.25483399593904	38.59462607139894	4.070906272024909
1034	189.0	0.6872727272727273	0.10476718403547672	124.99494936611666	67.46909001259742	4.366826443005199
1035	265.0	0.3212121212121212	0.11809269162210338	166.36753236814715	84.67838908890126	18.273158092598734
1036	207.0	0.48364485981308414	0.11311475409836065	144.57463914933368	77.6247110029715	6.304848209405718
1037	144.0	0.7619047619047619	0.11285266457680251	100.46803743153546	58.98034943852717	3.3295836110249684
1038	170.0	0.40572792362768495	0.1445578231292517	122.53300858899104	64.82366871729246	9.793052493727615
1039	60.0	0.631578947368421	0.15384615384615385	46.31370849898477	32.86909777053516	3.246223545376376
1040	249.0	0.5872641509433962	0.11266968325791855	156.30256121069152	81.92624577413487	6.222369998175089
1041	89.0	0.5426829268292683	0.1636029411764706	58.38477631085024	41.90164217570168	3.9711611197286927
1042	126.0	0.75	0.21875	83.01219330881975	42.73461632342956	4.191917175244314
1043	121.0	0.4859437751004016	0.11956521739130435	80.14823227814082	54.49734602074935	6.070083655560425
1044	144.0	0.7384615384615385	0.12224108658743633	98.61017305526642	53.92077724419289	3.8749269876874823
1045	124.0	0.7848101265822784	0.164021164021164	79.63961030678928	42.26257765171166	4.260192961919962
1046	101.0	0.7266187050359713	0.20404040404040405	74.73401871576772	39.49322441182662	3.903019850743582
1047	110.0	0.6179775280898876	0.3819444444444444	75.59188309203678	40.38092023018751	5.273428671962282
1048	72.0	0.7422680412371134	0.1956521739130435	49.11269837220809	29.468958592912315	3.6132794095108056
1049	110.0	0.5527638190954773	0.22916666666666666	85.24873734152916	45.58173984378184	5.184611791191397
1050	111.0	0.6646706586826348	0.4111111111111111	85.48528137423858	51.69681314737243	3.3257548096367935
1051	171.0	0.4723756906077348	0.1897891231964484	116.14823227814082	62.95843309094368	8.28463287519952
1052	141.0	0.5875	0.13988095238095238	98.9827560572969	52.36273484369381	5.866002240492488
1053	114.0	0.5253456221198156	0.3475609756097561	86.79898987322332	46.38096813674616	6.159719502070072
1054	35.0	0.7608695652173914	0.4375	28.449747468305834	17.840665262614568	2.663059796011675
1055	189.0	0.5675675675675675	0.10641891891891891	127.26702730475878	66.55632013218214	5.580171022070018
1056	221.0	0.6461988304093568	0.19051724137931034	132.32590180780454	69.1507958491215	5.361354404637819
1057	177.0	0.6276595744680851	0.16954022988505746	129.01219330881975	68.89454011069029	4.326562605977235
1058	331.0	0.2256305385139741	0.05531417112299465	232.35028842544403	135.22243034639635	19.701295698982104
1059	137.0	0.7248677248677249	0.15222222222222223	87.29646455628166	46.15867367243482	4.70461597590816
1060	36.0	0.8372093023255814	0.45	28.035533905932738	16.59683144664365	2.981755346108421
1061	198.0	0.66	0.12692307692307692	117.09545442950498	62.03758400945435	5.234871330868911
1062	33.0	0.9428571428571428	0.3	25.384776310850235	14.566348834612507	2.900491312883854
1063	57.0	0.7808219178082192	0.5181818181818182	42.27817459305203	24.14682650678164	3.3687897549198165
1064	138.0	0.6359447004608295	0.18157894736842106	91.49747468305833	47.759863506371445	4.989492837648443
1065	118.0	0.7468354430379747	0.16809116809116809	77.39696961966999	40.855518424769464	4.332073556481528
1066	99.0	0.7279411764705882	0.4230769230769231	70.48528137423857	44.420259027740194	3.1334727334664016
1067	135.0	0.6428571428571429	0.15271493212669685	89.63961030678928	47.999067171515435	5.214478423797516
1068	135.0	0.7068062827225131	0.12687969924812031	96.12489168102783	52.0651819607239	4.112923719892524
1069	207.0	0.6017441860465116	0.10171990171990172	139.58073580374355	75.71722534755264	4.926462453064929
1070	195.0	0.5735294117647058	0.09868421052631579	128.9594154601839	71.02535997071236	5.2464173059483565
1071	102.0	0.7285714285714285	0.6375	77.07106781186548	44.55841550417418	3.4195498160731614
1072	54.0	0.8307692307692308	0.5684210526315789	39.69238815542511	20.468800646752413	3.518627261648511
1073	108.0	0.631578947368421	0.14285714285714285	76.9827560572969	42.216500828043536	4.896064481862937
1074	105.0	0.7664233576642335	0.5833333333333334	74.27817459305201	40.95357790200018	3.5548075294294588
1075	132.0	0.7951807228915663	0.1625615763546798	82.46803743153546	42.69831753902937	4.456571050188845
1076	93.0	0.7153846153846154	0.48947368421052634	71.65685424949238	40.943144218091284	3.3874583413411057
1077	74.0	0.6491228070175439	0.2690909090909091	55.59188309203678	29.72225244296265	4.924897955308042
1078	99.0	0.6036585365853658	0.16282894736842105	75.25483399593904	40.14852657205133	5.283504929224608
1079	136.0	0.37057220708446864	0.24727272727272728	100.49137802864846	60.00982896197807	9.894574669228207
1080	102.0	0.7786259541984732	0.17708333333333334	80.18376618407356	42.89003407356696	3.2037911038943703
1081	88.0	0.7927927927927928	0.21674876847290642	66.94112549695427	35.09461855537645	3.3651686470182782
1082	78.0	0.6724137931034483	0.28888888888888886	59.420310216782966	33.09234028530587	4.1421455154433655
1083	134.0	0.7613636363636364	0.1127946127946128	101.22539674441617	56.74637795422698	3.243318830033596
1084	188.0	0.4688279301745636	0.09837781266352695	131.26702730475878	68.07892937002325	7.720940970864113
1085	97.0	0.6928571428571428	0.41452991452991456	69.27817459305203	44.148561686787374	3.3985056357799315
1086	56.0	0.7671232876712328	0.48695652173913045	41.86396103067892	26.239867799618985	2.8704957797885586
1087	82.0	0.6833333333333333	0.2192513368983957	54.35533905932738	29.574971042993983	4.5237655608457485
1088	133.0	0.7348066298342542	0.1310344827586207	92.57463914933368	50.78818070074081	3.812395185873477
1089	310.0	0.36773428232502964	0.07266760431317393	197.03657992645924	107.59345215544316	8.644652139356257
1090	112.0	0.7044025157232704	0.25339366515837103	75.90559159102155	40.07413957363282	4.349181330931437
1091	157.0	0.3819951338199513	0.1869047619047619	116.18376618407356	64.88485146550843	10.178915275806544
1092	168.0	0.5060240963855421	0.4067796610169492	121.00609665440987	67.63077329099775	6.555427429101675
1093	108.0	0.6835443037974683	0.25	78.4558441227157	40.70243457609512	3.8437087130274583
1094	32.0	0.7804878048780488	0.3516483516483517	27.071067811865476	16.14154507882039	2.746683903984816
1095	121.0	0.6875	0.605	94.44974746830584	57.585391762035215	3.3893528356532556
1096	121.0	0.6111111111111112	0.28537735849056606	95.72792206135784	58.53262294043458	3.21557885122657
1097	38.0	0.8085106382978723	0.3619047619047619	27.89949493661166	17.510477504883614	2.8939362988250985
1098	120.0	0.5333333333333333	0.2857142857142857	85.62741699796953	48.38538202936107	6.758067219216537
1099	103.0	0.8512396694214877	0.18659420289855072	67.15432893255071	35.852711828775725	3.803888270612849
1100	65.0	0.8125	0.3693181818181818	46.34924240491749	23.821724541138273	3.544342387954892
1101	122.0	0.7218934911242604	0.23597678916827852	85.76345596729058	53.68144711227763	3.1162472651361584
1102	196.0	0.6666666666666666	0.08872793119058398	131.4802307403552	71.25013044689305	4.70676164451478
1103	77.0	0.8020833333333334	0.5833333333333334	62.82842712474619	37.34514443098656	2.6839468695618045
1104	149.0	0.6742081447963801	0.14694280078895464	97.29646455628166	51.23535105564182	4.8393326945585935
1105	170.0	0.4582210242587601	0.19607843137254902	117.11879502661796	60.14968766137643	7.484969126200545
1106	140.0	0.7909604519774012	0.12058570198105081	99.84671708797582	55.41888993332289	3.3682348352188707
1107	144.0	0.5737051792828686	0.14906832298136646	100.74011537017762	52.58468716509291	6.214558510281112
1108	179.0	0.5203488372093024	0.12029569892473119	133.91168824543144	73.42975441277174	6.055969659388526
1109	96.0	0.7741935483870968	0.6153846153846154	71.65685424949237	42.9605164407827	3.2363387110051107
1110	139.0	0.5129151291512916	0.1858288770053476	96.63351365237938	51.17618066714838	6.455288859382749
1111	98.0	0.7596899224806202	0.1859582542694497	73.01219330881975	38.848630764747206	3.899407487008023
1112	164.0	0.7663551401869159	0.11781609195402298	117.3319984622144	61.147537680747575	3.5519503412919944
1113	67.0	0.8072289156626506	0.67	45.86396103067892	27.580582654474064	3.342921952520954
1114	158.0	0.7488151658767772	0.12248062015503876	100.71067811865476	55.14719287814901	4.028865589993896
1115	88.0	0.7521367521367521	0.29333333333333333	64.83452377915606	33.66488343563308	3.826020541318707
1116	73.0	0.6033057851239669	0.2616487455197133	59.970562748477136	35.97216648704914	3.8152899893182215
1117	157.0	0.628	0.11254480286738351	106.33199846221439	60.01102739116826	4.642693041526797
1118	167.0	0.3856812933025404	0.21830065359477124	109.49747468305833	54.32310023568974	11.89515008517688
1119	41.0	0.9318181818181818	0.803921568627451	31.621320343559642	17.63139750113231	2.853758081026662
1120	180.0	0.72	0.1184990125082291	122.02438661763951	64.26122774971294	4.034883779226956
1121	129.0	0.5944700460829493	0.13230769230769232	96.63961030678928	52.356631325529094	5.1072653923685145
1122	82.0	0.6259541984732825	0.3445378151260504	67.10660171779821	39.26564281174449	3.7173983749471122
1123	98.0	0.7424242424242424	0.35	70.5208152801713	40.36980879817348	3.3972554750264847
1124	99.0	0.717391304347826	0.4604651162790698	85.44974746830583	51.022826831992546	2.7718368692787263
1125	58.0	0.8055555555555556	0.464	44.242640687119284	26.35783194947856	2.9814345138114153
1126	140.0	0.6278026905829597	0.10752688172043011	99.46803743153546	55.86842891647442	4.483197359932908
1127	81.0	0.6864406779661016	0.5328947368421053	69.44974746830583	42.22377466467991	2.974972292043746
1128	128.0	0.7398843930635838	0.16473616473616473	89.7401153701776	46.465242958910416	3.81669153448715
1129	152.0	0.7069767441860465	0.20105820105820105	109.69848480983498	60.95098034237449	3.5321265182820825
1130	61.0	0.8243243243243243	0.4357142857142857	42.9350288425444	22.67168724993327	3.540751978404563
1131	167.0	0.44063324538258575	0.23587570621468926	119.49137802864844	64.61136113995595	7.902612872386072
1132	138.0	0.6079295154185022	0.19166666666666668	98.49137802864846	54.273063320415055	4.525990202842028
1133	75.0	0.8064516129032258	0.5681818181818182	62.03553390593274	36.162972749290994	2.6796562260097727
1134	115.0	0.8518518518518519	0.71875	78.82842712474618	44.71728574949945	3.3137006935539755
1135	147.0	0.6419213973799127	0.11421911421911422	97.78174593052023	54.95561068101325	4.727521097019403
1136	161.0	0.43513513513513513	0.2163978494623656	122.49137802864846	72.87463244504536	7.039108397894551
1137	177.0	0.427536231884058	0.17559523809523808	120.8050865276332	66.12166713951589	9.788784995270234
1138	148.0	0.6727272727272727	0.12241521918941274	100.95331880577403	55.74877881605172	4.231766304491686
1139	59.0	0.6210526315789474	0.49166666666666664	47.31370849898476	27.73059667473415	4.129189334298373
1140	183.0	0.6879699248120301	0.12159468438538205	114.71677477306463	60.02543963167338	4.8816155865763875
1141	64.0	0.7441860465116279	0.32	43.3492424049175	23.217517151483708	4.213262965987261
1142	94.0	0.6666666666666666	0.44761904761904764	67.10660171779821	37.598839273321246	4.46063072320464
1143	121.0	0.6470588235294118	0.16759002770083103	85.25483399593904	45.261764129798365	4.071888462075533
1144	164.0	0.784688995215311	0.11764705882352941	109.095454429505	58.486984042552464	3.8120948347562704
1145	126.0	0.504	0.35	90.42031021678298	51.28912947507644	6.2727260718642075
1146	233.0	0.4568627450980392	0.12987736900780378	155.88225099390854	80.5487660161618	8.1566677342855
1147	106.0	0.5638297872340425	0.33125	71.45584412271572	37.71367204478031	6.772721471867519
1148	43.0	0.8269230769230769	0.33076923076923076	31.79898987322333	16.834955332530836	3.6024998667942887
1149	130.0	0.7262569832402235	0.46099290780141844	93.31370849898477	52.45711992720083	3.8006743028426357
1150	244.0	0.2791762013729977	0.13034188034188035	170.22539674441617	95.96794791871307	14.071058293146342
1151	188.0	0.44976076555023925	0.2191142191142191	132.4558441227157	80.52814735503128	8.023686674394078
1152	155.0	0.7345971563981043	0.1076388888888889	99.4386001800126	59.87760699055392	3.8122162503318275
1153	139.0	0.5091575091575091	0.12636363636363637	94.91168824543144	54.8907085273742	7.028325860384657
1154	103.0	0.5819209039548022	0.20850202429149797	78.90559159102153	42.581449190156185	5.1978604222027345
1155	120.0	0.7947019867549668	0.16304347826086957	80.22539674441617	41.70116843263775	3.9657276504094003
1156	115.0	0.6388888888888888	0.24572649572649571	81.6274169979695	45.34827497498347	4.027923128958181
1157	162.0	0.49846153846153846	0.11688311688311688	113.95331880577403	59.64133251770657	6.884529569156869
1158	116.0	0.7682119205298014	0.15343915343915343	83.7401153701776	45.800950602805706	3.5397402416058017
1159	161.0	0.5962962962962963	0.22517482517482518	114.73401871576775	62.20097445657918	5.230094449596814
1160	171.0	0.7154811715481172	0.11272247857613711	113.33809511662427	62.31692556151554	4.51984236573165
1161	248.0	0.6391752577319587	0.08083441981747067	157.27922061357853	87.5494238582217	4.811892913914669
1162	76.0	0.6229508196721312	0.2878787878787879	58.89949493661166	37.82611622730204	3.3662658188369257
1163	45.0	0.7758620689655172	0.4166666666666667	33.89949493661167	20.722604607943136	3.090379974422361
1164	175.0	0.5700325732899023	0.0992063492063492	125.33809511662429	67.48948275865911	5.918197690803406
1165	118.0	0.8309859154929577	0.17559523809523808	75.01828996322963	39.577839214106724	3.9924862199067515
1166	168.0	0.5562913907284768	0.10281517747858017	116.2670273047588	63.309041316972944	6.524711755283146
1167	130.0	0.7514450867052023	0.30092592592592593	94.97056274847714	54.17629453196613	3.2870372289094134
1168	95.0	0.6985294117647058	0.30158730158730157	68.76345596729058	40.61570211050669	3.43167253968279
1169	117.0	0.6923076923076923	0.26590909090909093	82.76345596729058	49.56381631423559	3.435721284502291
1170	134.0	0.5296442687747036	0.1642156862745098	89.1543289325507	44.95094341456276	7.611992216474211
1171	128.0	0.46886446886446886	0.38095238095238093	93.34924240491749	55.64664963729571	5.903619897491484
1172	106.0	0.6583850931677019	0.4108527131782946	83.31370849898477	48.778559854467154	3.7264864934349706
1173	46.0	0.8070175438596491	0.5111111111111111	34.27817459305202	19.975068165257678	3.1542658122142013
1174	152.0	0.7638190954773869	0.17391304347826086	93.39696961966999	48.542759057981556	4.413384966379471
1175	292.0	0.4717285945072698	0.19210526315789472	175.49747468305833	91.67420334714161	8.779792946293414
1176	271.0	0.38936781609195403	0.14414893617021277	194.6335136523794	108.42600825715263	10.286103229648825
1177	76.0	0.9382716049382716	0.8735632183908046	54.03553390593274	31.485311695896062	3.132674826309832
1178	80.0	0.5369127516778524	0.29411764705882354	65.72792206135786	37.0162567643448	5.602832779594409
1179	46.0	0.8070175438596491	0.4842105263157895	33.44974746830583	19.954552455275763	3.0498620650590462
1180	125.0	0.6544502617801047	0.13440860215053763	86.46803743153546	45.97666394078944	4.92527896425284
1181	150.0	0.4854368932038835	0.12195121951219512	102.63961030678928	55.40840751768106	8.472980501382423
1182	182.0	0.6546762589928058	0.12364130434782608	116.2670273047588	61.399687010542365	5.211427907515701
1183	149.0	0.7967914438502673	0.7028301886792453	102.89949493661166	59.33893219235107	3.4319781013787822
1184	118.0	0.5198237885462555	0.1787878787878788	80.76955262170047	42.72606061885303	6.8150329978010395
1185	99.0	0.792	0.7279411764705882	69.69238815542512	38.41336764147878	3.766222812373796
1186	149.0	0.6081632653061224	0.19477124183006536	111.14823227814082	58.38148464092562	4.716060999126432
1187	105.0	0.7291666666666666	0.18229166666666666	78.52691193458118	43.83925387379951	3.3912119743196305
1188	137.0	0.5661157024793388	0.38375350140056025	100.14213562373095	59.04242649737139	4.358547331409752
1189	56.0	0.8115942028985508	0.5333333333333333	40.27817459305202	23.05647270927003	3.2804437359365957
1190	56.0	0.8615384615384616	0.6086956521739131	43.242640687119284	23.730328950042544	3.0861868296106927
1191	215.0	0.38188277087033745	0.10194404931247036	150.19595949289334	77.01841788441153	10.760230491619552
1192	93.0	0.7948717948717948	0.15789473684210525	68.59797974644665	38.290107214036595	3.1676048195100277
1193	200.0	0.5555555555555556	0.09569377990430622	135.33809511662426	74.77404977561518	6.622347027589515
1194	144.0	0.62882096069869	0.1254355400696864	104.71067811865476	55.21891634917829	4.390574156073493
1195	155.0	0.640495867768595	0.12301587301587301	103.16042558696059	56.69554938633915	4.4570919145523415
1196	34.0	0.8717948717948718	0.5230769230769231	26.692388155425114	14.030663156412263	3.0788945641766086
1197	114.0	0.7169811320754716	0.3958333333333333	76.97056274847714	40.94933128881674	4.322691509866379
1198	143.0	0.680952380952381	0.1690307328605201	106.25483399593905	56.756955722848	3.6687935516329
1199	177.0	0.708	0.1334841628959276	107.64570696119915	55.755657490051924	4.80608117770532
1200	112.0	0.717948717948718	0.13381123058542413	73.9827560572969	44.972019492490126	3.6889055276027443
1201	142.0	0.6761904761904762	0.11323763955342903	100.81727983645297	55.273606272888735	3.9036250981966165
1202	134.0	0.7657142857142857	0.14439655172413793	87.91778489984131	46.65465085667814	4.272444082243009
1203	187.0	0.6448275862068965	0.10784313725490197	125.68124086713189	67.88426265683465	4.3740615165668055
1204	191.0	0.5805471124620061	0.10380434782608695	126.40916292848975	67.74883251006744	6.300892128608149
1205	224.0	0.6627218934911243	0.13600485731633272	142.12489168102783	74.18424365659662	4.944329955711506
1206	100.0	0.7194244604316546	0.3968253968253968	80.48528137423857	45.62232350218612	3.2646589809467215
1207	73.0	0.7934782608695652	0.6293103448275862	56.03553390593274	31.838414162636756	3.2285401390978574
1208	155.0	0.45454545454545453	0.2609427609427609	108.07716446627535	61.999031604192886	8.570075773802841
1209	66.0	0.7674418604651163	0.2578125	47.11269837220809	23.244778340541416	4.7470279533045625
1210	42.0	0.8936170212765957	0.75	30.242640687119287	15.875243384239006	3.4855391393703594
1211	34.0	0.9714285714285714	0.8717948717948718	24.828427124746188	13.565122414691933	3.092783300799251
1212	37.0	0.8222222222222222	0.5285714285714286	28.863961030678926	15.552925497846896	3.08626994076147
1213	140.0	0.6698564593301436	0.13685239491691104	94.12489168102783	49.60982696904193	4.8919516096031135
1214	175.0	0.5737704918032787	0.22068095838587642	124.14823227814082	68.58079657120521	4.993160099718029
1215	120.0	0.547945205479452	0.3333333333333333	92.14213562373095	52.89391721705409	4.7621387925882015
1216	207.0	0.4847775175644028	0.20535714285714285	142.90559159102153	82.47578292528671	6.151565318470072
1217	170.0	0.391705069124424	0.16865079365079366	122.42640687119284	67.77139193302979	10.35666173919379
1218	104.0	0.6797385620915033	0.15407407407407409	74.15432893255071	39.49977974290696	4.793635230529691
1219	132.0	0.6346153846153846	0.14715719063545152	94.53300858899105	50.90161891616412	4.4803861682690505
1220	156.0	0.6666666666666666	0.1093969144460028	106.26093065034891	61.62953283565589	3.766512016152338
1221	119.0	0.7933333333333333	0.5666666666666667	84.69238815542512	46.21657158689302	3.5901510323147168
1222	147.0	0.6	0.16013071895424835	93.60407640085653	47.54518588239315	6.2077264509977566
1223	65.0	0.7386363636363636	0.5	49.89949493661166	29.171735993109262	3.727730273837863
1224	70.0	0.5982905982905983	0.35714285714285715	53.86396103067892	29.145496786118468	5.490735866499521
1225	156.0	0.6666666666666666	0.18571428571428572	99.49747468305833	51.90773347597143	5.2753965668762826
1226	142.0	0.7675675675675676	0.11745244003308519	102.02438661763951	55.28807864991252	3.508432292336034
1227	144.0	0.7128712871287128	0.20425531914893616	104.76955262170048	55.349723675036095	3.747415103954626
1228	77.0	0.7129629629629629	0.20698924731182797	61.798989873223334	35.1837154979991	3.1722210128297204
1229	72.0	0.6923076923076923	0.42857142857142855	55.27817459305203	29.983349180140998	3.8592529937972437
1230	96.0	0.7741935483870968	0.18045112781954886	63.2193000900063	36.484395675335485	3.603381511396237
1231	166.0	0.6775510204081633	0.10433689503456946	113.33809511662427	63.1340628876706	4.366613486519421
1232	45.0	0.7627118644067796	0.42857142857142855	33.14213562373095	16.21463709907376	4.33909736783622
1233	49.0	0.6447368421052632	0.30625	37.89949493661167	23.34885767562181	3.6108529215730383
1234	125.0	0.7621951219512195	0.13950892857142858	83.29646455628166	44.286799211854834	4.51482087893353
1235	154.0	0.5923076923076923	0.2558139534883721	95.59797974644665	49.23966620522175	7.0394199744740495
1236	100.0	0.7299270072992701	0.5405405405405406	70.69238815542512	42.22934828732049	3.4892611292624487
1237	177.0	0.6188811188811189	0.10845588235294118	124.23149339882606	67.2226617864399	5.268701414207716
1238	261.0	0.4851301115241636	0.10357142857142858	184.0538238691624	100.75327834369544	5.275665081333128
1239	163.0	0.6442687747035574	0.1212797619047619	110.02438661763952	59.08797200957217	4.9242240178875525
1240	188.0	0.4563106796116505	0.27485380116959063	126.66904755831214	65.83901195842067	9.359113038610905
1241	190.0	0.4668304668304668	0.09368836291913216	132.09545442950497	72.60691342510366	8.804726815310332
1242	130.0	0.7647058823529411	0.4126984126984127	89.89949493661167	51.54270635762579	3.404949586497994
1243	215.0	0.6379821958456974	0.10664682539682539	138.16652224137044	71.84381117996668	5.099167166479334
1244	66.0	0.66	0.21428571428571427	41.00609665440987	28.39822977206213	3.5600134117399413
1245	127.0	0.7514792899408284	0.10780984719864177	74.5685424949238	53.89989950338267	3.345656633669859
1246	119.0	0.8206896551724138	0.1328125	86.5035713374682	47.02957210612703	3.37407442608611
1247	224.0	0.5803108808290155	0.12121212121212122	162.94722215136414	91.32931386213642	4.6264256911204
1248	75.0	0.6756756756756757	0.3968253968253968	53.86396103067892	32.35787698732657	3.7037844288327415
1249	215.0	0.4223968565815324	0.12188208616780045	149.88225099390857	79.81142693149428	8.61178668665609
1250	105.0	0.6818181818181818	0.2413793103448276	68.94112549695427	36.88370090806685	4.418765341457159
1251	133.0	0.5683760683760684	0.2261904761904762	92.5269119345812	49.318913640431674	6.166459256487737
1252	126.0	0.6596858638743456	0.12413793103448276	86.39696961966999	50.597808253226205	4.01155687750972
1253	140.0	0.46204620462046203	0.2692307692307692	107.45584412271572	61.09439624817296	6.6391273807144655
1254	128.0	0.5446808510638298	0.17273954116059378	87.25483399593904	45.875443977820694	6.676194239634929
1255	243.0	0.40365448504983387	0.23823529411764705	170.2842712474619	98.33189215515924	8.698758419834231
1256	148.0	0.5034013605442177	0.11916264090177134	110.9827560572969	59.42485812225463	7.4912395224247135
1257	45.0	0.8333333333333334	0.4017857142857143	33.14213562373095	16.896918067041312	3.552962503565472
1258	123.0	0.6871508379888268	0.36607142857142855	95.31370849898477	54.52422581404427	3.4739812264800474
1259	212.0	0.5760869565217391	0.0891130727196301	145.58073580374355	81.8450526090522	5.065716368392705
1260	58.0	0.5918367346938775	0.4142857142857143	42.970562748477136	23.293918558353273	5.32552847701226
1261	110.0	0.8208955223880597	0.3125	71.4558441227157	36.63216230577412	3.9403054599195
1262	73.0	0.73	0.37244897959183676	54.10660171779821	32.635421877011886	3.1000673165192225
1263	189.0	0.45542168674698796	0.10535117056856187	129.26702730475878	65.99727470582005	9.206540722786091
1264	179.0	0.5792880258899676	0.22948717948717948	132.8700576850888	74.42511833850249	4.556664113785037
1265	119.0	0.5483870967741935	0.2404040404040404	77.97665940288701	39.44864795595982	6.6618619723726145
1266	196.0	0.4962025316455696	0.11951219512195121	125.78174593052023	63.46155910961931	9.57612406949104
1267	150.0	0.6756756756756757	0.11627906976744186	105.5035713374682	56.59382179046384	4.267265795734036
1268	57.0	0.9344262295081968	0.3392857142857143	36.45584412271571	18.055323080227083	4.054842839219254
1269	149.0	0.6032388663967612	0.38010204081632654	105.14213562373095	64.69615652119336	4.130790234020164
1270	81.0	0.75	0.38571428571428573	61.27817459305202	33.49272430870759	3.461454128661082
1271	119.0	0.7168674698795181	0.15025252525252525	88.94722215136416	46.68416946984461	3.7200914018353024
1272	127.0	0.5450643776824035	0.3557422969187675	96.72792206135784	60.47374874981335	4.001184113730881
1273	237.0	0.3553223388305847	0.148125	172.5685424949238	91.91420586860596	9.379006696419113
1274	118.0	0.7329192546583851	0.24380165289256198	86.55634918610404	50.382306452166674	3.152649315902215
1275	93.0	0.8454545454545455	0.2325	61.012193308819754	31.62975637518448	3.8649530217551487
1276	208.0	0.49056603773584906	0.17777777777777778	140.53910524340094	48.261124159388125	12.876949093207095
1277	64.0	0.7619047619047619	0.4266666666666667	48.071067811865476	27.815143138835346	3.16805337172546
1278	141.0	0.8103448275862069	0.16114285714285714	88.84671708797582	46.311525028327104	4.064065665404072
1279	146.0	0.7156862745098039	0.1267361111111111	98.61017305526643	52.896135971642536	4.225124818852478
1280	87.0	0.6904761904761905	0.23015873015873015	62.112698372208094	32.89483398910507	4.048382727517563
1281	79.0	0.7247706422018348	0.5096774193548387	58.27817459305203	33.21286323583475	3.8826846115106193
1282	138.0	0.7419354838709677	0.5	94.10660171779821	52.35168442032144	3.709146143542795
1283	49.0	0.8596491228070176	0.3888888888888889	34.59188309203678	17.09773751118904	3.926721545293541
1284	129.0	0.6548223350253807	0.274468085106383	91.59188309203677	52.6675863727042	4.040179468615094
1285	107.0	0.6045197740112994	0.39338235294117646	74.00609665440987	38.77259841981075	5.921971810873766
1286	141.0	0.5402298850574713	0.4351851851851852	104.38477631085024	60.37020642341806	5.120873769771601
1287	164.0	0.7130434782608696	0.10123456790123457	116.13098833543772	65.35267857418175	3.6480389836953577
1288	136.0	0.7513812154696132	0.16605616605616605	92.36143571373725	47.54902177222387	4.128520407327022
1289	125.0	0.7102272727272727	0.4340277777777778	93.48528137423857	53.67971674608673	3.403670086817464
1290	86.0	0.5584415584415584	0.25219941348973607	65.42031021678298	36.701824280563066	5.747188683777058
1291	228.0	0.562962962962963	0.08425720620842572	154.58073580374355	87.93127346696345	4.786681755085906
1292	74.0	0.7789473684210526	0.5967741935483871	56.44974746830583	33.96889067283123	3.142896332319199
1293	134.0	0.7657142857142857	0.18611111111111112	93.25483399593904	48.24997387727037	4.063945147124037
1294	221.0	0.6155988857938719	0.22233400402414488	147.59797974644667	80.04952456161286	4.962453053002242
1295	130.0	0.47101449275362317	0.18055555555555555	97.31980515339464	52.14583404866005	7.851621978990509
1296	54.0	0.8059701492537313	0.25	40.83452377915607	22.386552912995835	3.366094007255519
1297	74.0	0.7254901960784313	0.2803030303030303	55.04163056034262	28.590654571517394	3.746968683235877
1298	527.0	0.2767857142857143	0.08812709030100334	300.8355697996826	155.5179869433885	19.885675311819575
1299	179.0	0.5391566265060241	0.09236326109391124	127.33809511662427	72.02348418924711	6.574800819742067
1300	131.0	0.5137254901960784	0.20793650793650795	98.5269119345812	52.64197922943066	5.524981452105897
1301	130.0	0.6842105263157895	0.3611111111111111	85.79898987322333	45.56289867038257	4.821501854927093
1302	168.0	0.5106382978723404	0.15483870967741936	109.84671708797583	49.93064684728157	8.36105631972812
1303	348.0	0.4366373902132999	0.05253623188405797	246.0548698896889	135.4104374084041	6.936186243292177
1304	185.0	0.6776556776556777	0.096004151530877	127.48023074035522	70.04817484444187	4.569888433045038
1305	145.0	0.7178217821782178	0.14384920634920634	110.08326112068522	57.69183330888074	3.521883805070645
1306	130.0	0.6878306878306878	0.25193798449612403	93.4558441227157	49.810004385025316	3.9639986943699346
1307	203.0	0.6464968152866242	0.09227272727272727	135.7228714274745	73.83379270248831	4.462522974114264
1308	170.0	0.6367041198501873	0.12878787878787878	105.19595949289332	55.427429628522404	5.329493876796303
1309	115.0	0.6927710843373494	0.26497695852534564	69.90559159102155	35.86749648190052	4.900041712706196
1310	117.0	0.639344262295082	0.195	86.11269837220809	46.38295085803384	4.006795075216782
1311	40.0	0.9523809523809523	0.8888888888888888	29.621320343559645	16.245899587839318	3.093662325116012
1312	216.0	0.5034965034965035	0.08430913348946135	152.2731239591687	81.10728265852988	6.94113423498866
1313	221.0	0.25757575757575757	0.10859950859950859	147.1543289325507	72.7305571653693	20.029932129485115
1314	185.0	0.5068493150684932	0.13909774436090225	112.12489168102786	57.17108379676452	8.430270253029924
1315	188.0	0.49214659685863876	0.22380952380952382	137.79898987322332	82.69143066435777	4.8407502323596
1316	158.0	0.5505226480836237	0.32916666666666666	109.7634559672906	68.48908701540661	4.713312753318519
1317	128.0	0.445993031358885	0.2318840579710145	93.90559159102153	53.24705386769529	8.155009754638906
1318	207.0	0.6310975609756098	0.13450292397660818	134.08935777509512	69.47870145418234	5.012390271737875
1319	312.0	0.5777777777777777	0.06431663574520717	199.80613254815975	113.1599721078369	5.2721966694379825
1320	176.0	0.6848249027237354	0.19298245614035087	123.97665940288701	65.65405745192463	4.258293853841086
1321	138.0	0.7840909090909091	0.14603174603174604	90.71067811865476	48.62361085934252	3.9136716453211693
1322	60.0	0.7894736842105263	0.5217391304347826	44.27817459305203	25.350205807837405	3.1990205011774018
1323	95.0	0.6785714285714286	0.48717948717948717	70.27817459305203	42.11830029747087	3.451255180877462
1324	190.0	0.5974842767295597	0.09268292682926829	133.2020561473032	72.01586935817457	5.617285444624197
1325	227.0	0.5805626598465473	0.10809523809523809	147.3380951166243	77.43881496439562	6.0562216460483
1326	42.0	0.7924528301886793	0.3088235294117647	31.31370849898476	19.3659442106202	3.0607790015700416
1327	86.0	0.7818181818181819	0.27741935483870966	64.79898987322332	35.889108391313634	3.1866440640387257
1328	630.0	0.39697542533081287	0.032031726662599146	410.02647865869255	225.28662546025558	8.833344697883927
1329	100.0	0.5076142131979695	0.30303030303030304	69.94112549695429	35.14762003115888	8.226883136721886
1330	176.0	0.48484848484848486	0.13793103448275862	124.46194077712559	65.99238269352954	6.342232900665279
1331	154.0	0.6936936936936937	0.12419354838709677	104.61017305526642	57.033071346230926	4.336950599210942
1332	245.0	0.2895981087470449	0.11824324324324324	164.18986283848344	88.95547197616071	16.47904955450569
1333	94.0	0.6811594202898551	0.573170731707317	76.86396103067892	45.75518438787254	3.2065595614603177
1334	161.0	0.5812274368231047	0.18830409356725147	115.76955262170047	66.1138491409169	4.53879193869952
1335	101.0	0.6644736842105263	0.258974358974359	74.17766952966369	45.59756698362941	3.5426192329570885
1336	209.0	0.6830065359477124	0.10476190476190476	140.75230867899737	74.07705666215475	4.215258457692536
1337	199.0	0.5437158469945356	0.07896825396825397	137.3380951166243	79.014685158109	5.899681630120119
1338	156.0	0.49523809523809526	0.15918367346938775	106.08326112068522	55.66387759025681	7.752129981922159
1339	181.0	0.5355029585798816	0.1117283950617284	126.675144212722	68.77868768348938	5.279569576804291
1340	129.0	0.6898395721925134	0.24431818181818182	97.00609665440989	53.38973124979333	3.545191959518226
1341	134.0	0.7015706806282722	0.13293650793650794	94.12489168102783	49.352276920803085	4.551909748459269
1342	103.0	0.47685185185185186	0.2601010101010101	66.87005768508881	37.93435962736688	8.745601060332211
1343	144.0	0.5538461538461539	0.3050847457627119	105.9350288425444	68.07513530869507	4.333745947494475
1344	41.0	0.8541666666666666	0.4823529411764706	32.071067811865476	17.814824916850835	2.898276802322137
1345	36.0	0.8780487804878049	0.5538461538461539	27.48528137423857	13.843012337383168	3.5712358472159433
1346	171.0	0.5588235294117647	0.1387987012987013	124.74011537017762	67.28451927970093	5.071931270280162
1347	121.0	0.6111111111111112	0.15512820512820513	84.84062043356595	47.9811585820825	4.593592535986839
1348	114.0	0.7450980392156863	0.475	81.10660171779821	43.99405594578008	3.727538110109323
1349	133.0	0.5341365461847389	0.175	93.66904755831213	48.59570804184906	7.064583799717005
1350	192.0	0.5907692307692308	0.10256410256410256	126.373629022557	68.83682118550202	5.246554800025135
1351	48.0	0.7868852459016393	0.6	36.82842712474619	22.979845633684487	2.8908909020555473
1352	163.0	0.5800711743772242	0.2905525846702317	108.2842712474619	58.569804628358604	4.993358171363181
1353	69.0	0.71875	0.24125874125874125	52.698484809834994	27.23265049619457	3.6638947602118077
1354	152.0	0.5333333333333333	0.16666666666666666	106.4619407771256	58.516918462813514	6.108565702853241
1355	133.0	0.4925925925925926	0.12618595825426945	94.98275605729688	49.01420790734745	7.4464402197405235
1356	71.0	0.8160919540229885	0.23355263157894737	50.562445840513924	26.06848185418902	3.9662600401053827
1357	192.0	0.3742690058479532	0.13333333333333333	125.19595949289331	61.65268810806667	13.338568259604239
1358	110.0	0.6918238993710691	0.20793950850661624	66.87615433949867	34.297072944039805	5.214256746807335
1359	88.0	0.6027397260273972	0.3793103448275862	63.04163056034261	31.901620890551122	5.6666537498634435
1360	119.0	0.8561151079136691	0.1328125	78.46803743153546	45.157443830881846	3.5450970107578064
1361	112.0	0.5863874345549738	0.26107226107226106	80.6274169979695	45.01406186702439	5.182712585307519
1362	138.0	0.5564516129032258	0.193006993006993	107.76345596729058	63.19333516851746	4.1831113450590784
1363	130.0	0.5371900826446281	0.1536643026004728	105.25483399593904	55.288439562952995	4.899539990020709
1364	40.0	0.8333333333333334	0.4166666666666667	31.69238815542512	17.67607184442562	2.964200423504417
1365	147.0	0.6282051282051282	0.1701388888888889	105.0477272147525	56.17293906543391	4.84050395183433
1366	190.0	0.6462585034013606	0.10348583877995643	130.5452018978108	69.23593379034156	5.162370629602968
1367	130.0	0.6951871657754011	0.13756613756613756	90.71067811865476	48.8667875687982	4.271846244785342
1368	105.0	0.7894736842105263	0.13409961685823754	71.39696961967	44.4970402726224	3.3561641520673775
1369	114.0	0.6589595375722543	0.18719211822660098	74.08326112068524	38.579155065339386	5.421334607728572
1370	121.0	0.7076023391812866	0.44814814814814813	85.10660171779821	51.925480248647986	3.2587903260217566
1371	162.0	0.5827338129496403	0.13810741687979539	118.5685424949238	61.639766145488096	5.141999539659586
1372	146.0	0.776595744680851	0.15482502651113467	97.77564927611034	51.33008316010263	3.777520820104562
1373	160.0	0.37825059101654845	0.23323615160349853	109.25483399593904	55.95565471774689	11.946273691335314
1374	271.0	0.26413255360623783	0.10371220818982013	175.30256121069152	87.1525822489523	20.44070526956334
1375	111.0	0.8102189781021898	0.19204152249134948	80.42640687119285	41.73461513690514	3.536676044589096
1376	106.0	0.75177304964539	0.16459627329192547	74.18986283848345	39.44021009165766	4.089064798143085
1377	33.0	1.0	0.9705882352941176	33.207106781186546	19.07031328946885	1.996303168345601
1378	101.0	0.5804597701149425	0.4105691056910569	77.52081528017132	46.78187531009307	4.110140688508684
1379	173.0	0.5242424242424243	0.13307692307692306	120.01828996322962	63.154417057173475	6.593129295327525
1380	353.0	0.48027210884353744	0.057566862361382906	212.7056274847714	126.66642747986096	5.899078729064352
1381	125.0	0.6067961165048543	0.1984126984126984	93.11269837220809	52.04729340365729	4.633880593370133
1382	32.0	0.7441860465116279	0.5333333333333333	28.414213562373096	16.88567770091858	2.7326980405271577
1383	91.0	0.7913043478260869	0.19444444444444445	61.42640687119285	31.936699675891834	3.9688890604172298
1384	199.0	0.38049713193116635	0.25480153649167736	145.35533905932738	82.06397646539106	9.613314431729645
1385	175.0	0.691699604743083	0.16309412861137	99.88225099390857	51.472976002354336	5.392545746149942
1386	237.0	0.5511627906976744	0.10509977827050998	145.23759005323592	75.5473199360889	7.557228284772081
1387	226.0	0.6277777777777778	0.08692307692307692	147.62236636408622	78.47604616684315	5.373798354796013
1388	142.0	0.6826923076923077	0.27307692307692305	101.76345596729058	59.14420414066094	3.4807849744800325
1389	218.0	0.6318840579710145	0.14690026954177898	128.12489168102786	66.7055243502968	5.534945827183782
1390	81.0	0.648	0.38571428571428573	58.69238815542512	34.083800466594	4.2268135221642975
1391	109.0	0.6855345911949685	0.20643939393939395	76.97665940288701	40.53133751749293	4.429626080808956
1392	134.0	0.432258064516129	0.10371517027863777	97.70458146424487	56.977589753627655	8.387861838086163
1393	133.0	0.5635593220338984	0.2159090909090909	94.31980515339464	52.234770154915125	5.701968872776732
1394	461.0	0.15204485488126648	0.08017391304347826	289.71782079359116	133.5792886624699	48.75798376745925
1395	122.0	0.6815642458100558	0.3546511627906977	85.7634559672906	48.69722050842858	3.932678559852403
1396	105.0	0.6687898089171974	0.34539473684210525	78.97056274847714	41.816314923279336	4.116828620729222
1397	104.0	0.7647058823529411	0.21666666666666667	74.18376618407356	37.89642131087401	3.812391474102663
1398	266.0	0.3333333333333333	0.11083333333333334	181.61017305526644	93.59876774402596	14.858290041843974
1399	269.0	0.6031390134529148	0.10346153846153847	161.48023074035524	84.97885118217951	5.721137739459299
1400	85.0	0.7024793388429752	0.5483870967741935	60.86396103067893	34.58145084610044	4.006060021306502
1401	62.0	0.775	0.21678321678321677	51.3492424049175	29.589131118721546	2.781025004588959
1402	173.0	0.5728476821192053	0.1418032786885246	129.6335136523794	70.11511674917904	4.8234744675071495
1403	192.0	0.4383561643835616	0.14307004470938897	137.5685424949238	72.83018269013102	9.329039735026015
1404	79.0	0.6929824561403509	0.246875	63.384776310850235	35.41639836407697	3.45356114061996
1405	213.0	0.49078341013824883	0.08031674208144797	156.92388155425118	89.12369048401987	5.787747783143517
1406	170.0	0.7456140350877193	0.14297729184188393	102.95331880577405	53.543617375891735	4.585798776094663
1407	112.0	0.6706586826347305	0.15114709851551958	88.46194077712559	46.20842827364428	4.014550493286324
1408	41.0	0.7884615384615384	0.5694444444444444	32.82842712474619	20.479814159330726	2.679631387497895
1409	125.0	0.6510416666666666	0.17099863201094392	92.5269119345812	51.10757758743606	3.712537830676419
1410	181.0	0.6441281138790036	0.15121136173767752	126.70458146424488	64.81388860304627	5.323684359550233
1411	270.0	0.22443890274314215	0.11235955056179775	194.47413408594537	104.65853213889193	20.08835467299533
1412	176.0	0.47956403269754766	0.13622291021671826	111.29646455628165	56.331220955587405	9.5266130167099
1413	59.0	0.7763157894736842	0.36875	44.14213562373095	23.652612541658467	3.518580196037914
1414	129.0	0.6861702127659575	0.1340956340956341	90.46803743153546	49.64459925996799	4.579528810881858
1415	138.0	0.4825174825174825	0.3262411347517731	99.49137802864846	53.57412778543185	6.963325376082088
1416	106.0	0.7310344827586207	0.1781512605042017	78.42640687119285	41.66226882011679	3.730761598845832
1417	98.0	0.620253164556962	0.22171945701357465	75.11269837220809	38.984013899683035	4.526944245406059
1418	91.0	0.8504672897196262	0.2275	59.597979746446654	30.41709878139063	4.0766067583990315
1419	73.0	0.5934959349593496	0.32589285714285715	54.14213562373096	32.11829390826133	4.470973118456282
1420	126.0	0.5833333333333334	0.18421052631578946	86.25483399593904	44.6026403528188	6.6684267432479984
1421	110.0	0.632183908045977	0.17054263565891473	88.66295090390226	49.244790324752664	3.766649793189464
1422	207.0	0.3103448275862069	0.19491525423728814	137.78174593052023	67.67676064928875	17.216646222526943
1423	98.0	0.7538461538461538	0.21350762527233116	65.01219330881975	33.272467294162645	4.268963928189714
1424	138.0	0.6934673366834171	0.13690476190476192	92.71067811865476	49.49615601838593	4.879809318356502
1425	69.0	0.6388888888888888	0.4928571428571429	52.86396103067892	32.09619677004499	3.6532205180267283
1426	158.0	0.6053639846743295	0.15991902834008098	115.25483399593904	61.97196820714689	4.442667443140849
1427	178.0	0.6872586872586872	0.12714285714285714	121.53910524340094	63.98500909881457	4.492602383017502
1428	147.0	0.7819148936170213	0.15806451612903225	87.29646455628165	46.47959388631801	4.989078881789765
1429	62.0	0.775	0.27555555555555555	48.7634559672906	27.133451796097745	3.077314138546791
1430	115.0	0.8984375	0.1416256157635468	81.08935777509511	44.23865329994352	3.4374789020042646
1431	139.0	0.6682692307692307	0.3082039911308204	90.04163056034263	47.5162145203271	4.752358107090957
1432	175.0	0.5993150684931506	0.12254901960784313	124.12489168102785	66.3413689887349	4.802921037914528
1433	110.0	0.6145251396648045	0.1870748299319728	73.46194077712559	37.74699758101409	5.70398223071723
1434	157.0	0.5376712328767124	0.11393323657474601	113.77564927611034	66.77371366745759	5.607732797988189
1435	135.0	0.6585365853658537	0.4787234042553192	94.55634918610404	52.1036030085656	4.434725410376324
1436	159.0	0.654320987654321	0.12268518518518519	116.12489168102785	60.30383050383692	4.660311831999876
1437	163.0	0.6293436293436293	0.1108843537414966	112.4386001800126	60.62694699638747	4.757581301706511
1438	173.0	0.8398058252427184	0.09812819058423142	116.89444430272832	65.44375686124782	3.5609446168234307
1439	89.0	0.7295081967213115	0.19017094017094016	61.59797974644667	33.72681797821766	3.9737230949214775
1440	194.0	0.5590778097982709	0.22045454545454546	121.18376618407356	63.24275288060752	6.687351174369602
1441	68.0	0.6938775510204082	0.18681318681318682	56.17766952966369	33.75549558649064	2.8905786697564633
1442	166.0	0.7217391304347827	0.11448275862068966	120.36753236814712	63.429955085319946	3.649199630202498
1443	106.0	0.6751592356687898	0.20703125	75.18376618407356	38.92276357846463	4.5709040589573595
1444	150.0	0.5119453924914675	0.16304347826086957	97.98275605729691	51.353464296782434	7.625781872276216
1445	173.0	0.6156583629893239	0.10921717171717171	121.2670273047588	63.08587906616167	4.939906413439898
1446	87.0	0.6641221374045801	0.19333333333333333	68.31980515339464	37.1530412668704	3.659983638027285
1447	98.0	0.7313432835820896	0.3783783783783784	70.31370849898475	40.93377471301737	3.358556037355838
1448	152.0	0.5868725868725869	0.2087912087912088	110.4558441227157	63.69716307204347	4.075849887762442
1449	149.0	0.5340501792114696	0.22172619047619047	104.14823227814084	55.85207592262312	6.872172554782808
1450	74.0	0.961038961038961	0.8809523809523809	43.65685424949238	22.476983447450454	4.187790479316708
1451	154.0	0.6311475409836066	0.1527777777777778	107.9116882454314	57.377510806209834	4.893126882457534
1452	150.0	0.8426966292134831	0.11583011583011583	99.095454429505	54.635870655483295	3.6277011308922877
1453	128.0	0.7191011235955056	0.14814814814814814	85.05382386916239	45.58861687194038	4.331511985257888
1454	144.0	0.6824644549763034	0.21333333333333335	100.94112549695427	53.42078256879808	3.9947019986711236
1455	246.0	0.643979057591623	0.10933333333333334	171.57463914933368	89.49375024907768	4.233798311096222
1456	116.0	0.6408839779005525	0.34523809523809523	80.5208152801713	47.271253102615404	3.916561063013871
1457	161.0	0.41818181818181815	0.14907407407407408	122.39087296526012	67.76527639120403	7.67078655234557
1458	119.0	0.7	0.17246376811594202	92.62741699796953	55.50340302472943	3.0207070842703456
1459	70.0	0.7526881720430108	0.2692307692307692	55.17766952966368	29.37454008107356	3.3265884842838847
1460	61.0	0.7439024390243902	0.4066666666666667	45.278174593052015	25.99122196090225	3.447389113813007
1461	41.0	0.640625	0.43157894736842106	36.03553390593274	21.310092595902514	3.593917288685963
1462	129.0	0.7633136094674556	0.16287878787878787	87.7401153701776	46.371290474868175	3.837347168074995
1463	72.0	0.72	0.36363636363636365	49.76345596729059	25.4245568060691	4.5983018986108215
1464	191.0	0.3374558303886926	0.16077441077441076	132.8050865276332	75.49648428741088	12.21195862268192
1465	42.0	0.9130434782608695	0.4375	29.556349186104047	14.650182529385527	3.6617527271547736
1466	154.0	0.5292096219931272	0.175	110.94112549695427	63.54778321477261	5.850563071951514
1467	154.0	0.6905829596412556	0.18872549019607843	112.01219330881973	58.81932726251312	3.697812980316291
1468	123.0	0.6029411764705882	0.1576923076923077	90.59797974644665	48.962447310494625	4.964111133421684
1469	133.0	0.6616915422885572	0.2309027777777778	95.62741699796952	55.301183384022984	3.4772529002963113
1470	151.0	0.49834983498349833	0.19738562091503267	101.80508652763321	52.46224717688885	7.925731627201769
1471	37.0	0.7872340425531915	0.3627450980392157	31.449747468305834	19.163725011929092	2.602044510015404
1472	94.0	0.7230769230769231	0.18007662835249041	68.59797974644667	35.020527000287714	3.896579454717551
1473	124.0	0.49206349206349204	0.15656565656565657	88.46194077712559	44.725535066649755	7.835196278524687
1474	200.0	0.437636761487965	0.09615384615384616	136.6162697096763	70.97724643933431	7.8160660111084495
1475	45.0	0.7142857142857143	0.234375	36.14213562373095	21.79473599899245	3.2556657195468355
1476	103.0	0.7923076923076923	0.22294372294372294	75.90559159102153	39.59043042061829	3.4535587241630448
1477	32.0	0.7441860465116279	0.3076923076923077	22.899494936611664	14.745885436311095	3.4318526628030463
1478	144.0	0.5106382978723404	0.2260596546310832	102.94112549695427	54.36237286852725	7.877937002277537
1479	154.0	0.751219512195122	0.16382978723404254	108.91168824543142	56.77186517819718	3.724898948036766
1480	190.0	0.5671641791044776	0.18322082931533268	130.76955262170048	72.00520403381555	5.3421503056288016
1481	124.0	0.5610859728506787	0.36151603498542273	88.89949493661166	56.18105412707336	5.178929539692306
1482	158.0	0.4831804281345566	0.2872727272727273	108.73401871576773	57.384980003554254	8.315432193517244
1483	56.0	0.7567567567567568	0.2545454545454545	44.72792206135786	26.032736996647753	2.994156276867694
1484	75.0	0.6756756756756757	0.2976190476190476	50.834523779156065	25.962833878035248	4.759146902940431
1485	117.0	0.6802325581395349	0.1924342105263158	85.97665940288702	45.02892909021233	4.153482233621817
1486	102.0	0.7132867132867133	0.20118343195266272	78.4558441227157	45.93202746256167	3.1134678560147355
1487	109.0	0.630057803468208	0.1703125	83.28427124746189	46.90501985297923	4.069001026606243
1488	301.0	0.524390243902439	0.06147875816993464	191.32085117392117	113.65733524728917	6.787863329565714
1489	225.0	0.6284916201117319	0.12335526315789473	165.56854249492378	88.30891103163955	4.34073616229555
1490	123.0	0.6507936507936508	0.1626984126984127	96.2193000900063	51.24843335210663	3.7657404158364867
1491	171.0	0.3307543520309478	0.16442307692307692	126.80508652763321	76.51128184759912	11.66260826513906
1492	77.0	0.77	0.2950191570881226	59.34924240491749	33.209662121532865	3.0887979360040454
1493	133.0	0.6303317535545023	0.15447154471544716	94.91168824543142	51.187955463071354	5.0409493323889185
1494	108.0	0.72	0.6136363636363636	83.07106781186548	50.17773389636042	3.2723160874388046
1495	307.0	0.5016339869281046	0.06482263513513513	198.73506473629425	108.83706397936209	8.213282733444602
1496	170.0	0.6204379562043796	0.11805555555555555	111.43860018001261	58.62304580890052	5.753899392502272
1497	117.0	0.7267080745341615	0.15853658536585366	87.73401871576773	49.518033843460515	3.2838718579507327
1498	233.0	0.5796019900497512	0.13483796296296297	159.81118318204307	86.38745835726442	5.149042994475709
1499	62.0	0.8157894736842105	0.4305555555555556	45.89949493661166	26.00037004811574	3.192327532031106
1500	141.0	0.6746411483253588	0.13662790697674418	104.22539674441617	54.649875294892276	3.935991693315375
1501	68.0	0.7555555555555555	0.3148148148148148	48.48528137423857	30.989393717080866	2.9299851002841977
1502	102.0	0.6071428571428571	0.19428571428571428	75.31980515339464	42.263388213909195	4.677752912761716
1503	107.0	0.8045112781954887	0.7039473684210527	73.24264068711929	42.782868897505885	3.6419536672416966
1504	150.0	0.7731958762886598	0.1273344651952462	99.43860018001261	52.80376055572477	4.31617423913505
1505	69.0	0.7931034482758621	0.31363636363636366	49.79898987322333	25.29963419629215	3.6289702820224345
1506	102.0	0.6035502958579881	0.4975609756097561	77.6923881554251	47.16381622147141	4.002936107642099
1507	173.0	0.692	0.6070175438596491	117.55634918610404	64.52792931652827	4.181679451619509
1508	148.0	0.6192468619246861	0.22322775263951736	106.24873734152916	58.39528990292523	4.751492048380652
1509	220.0	0.4426559356136821	0.07282356835484939	145.0304832720494	86.6699595966127	8.476496686928265
1510	113.0	0.653179190751445	0.2511111111111111	84.72792206135784	49.98697008954458	3.7229587300342146
1511	120.0	0.47058823529411764	0.2222222222222222	89.42031021678298	50.88666017356575	6.613373214096254
1512	116.0	0.58	0.4496124031007752	84.5208152801713	50.470747867930186	4.101381066834459
1513	87.0	0.8207547169811321	0.6397058823529411	64.07106781186548	36.039516106877954	3.297652213384369
1514	81.0	0.6923076923076923	0.21774193548387097	63.59188309203678	35.11689967622998	3.8790749405032368
1515	63.0	0.8076923076923077	0.2179930795847751	46.562445840513924	25.14432138592632	3.4201746090942207
1516	122.0	0.7218934911242604	0.16073781291172595	83.39696961967	44.02485788657374	4.341942947126551
1517	35.0	0.9722222222222222	0.4861111111111111	23.556349186104043	11.893068272038269	3.721946568707048
1518	43.0	0.8775510204081632	0.4387755102040816	32.14213562373095	15.84834719704253	3.5006349331037057
1519	114.0	0.4691358024691358	0.18095238095238095	91.11269837220809	51.41002387804479	6.105759365458625
1520	347.0	0.38555555555555554	0.06274864376130199	224.9777054234135	115.8479258060649	10.752194569340054
1521	193.0	0.5146666666666667	0.21092896174863388	131.56244584051393	69.97986765701071	6.8266962275074095
1522	188.0	0.6690391459074733	0.18164251207729468	137.49137802864846	77.51560328412565	3.4701550879789487
1523	35.0	0.9210526315789473	0.4166666666666667	28.14213562373095	14.588777704058456	3.0857496359641137
1524	149.0	0.6563876651982379	0.11443932411674347	106.81727983645297	57.42015476205057	4.703239093927134
1525	122.0	0.6703296703296703	0.1955128205128205	87.18376618407356	45.190235559080676	4.242968549444583
1526	182.0	0.5967213114754099	0.1430817610062893	124.22539674441617	64.56700669874239	5.266210277209926
1527	121.0	0.6722222222222223	0.1400462962962963	89.60407640085654	47.553706138883626	4.033175721405995
1528	162.0	0.7136563876651982	0.12153038259564891	110.40306627407988	59.02791518716454	4.408807835365972
1529	93.0	0.5636363636363636	0.3059210526315789	72.9350288425444	43.2224500951305	4.102027470876573
1530	103.0	0.8174603174603174	0.21638655462184875	67.84062043356596	35.18333992345409	3.9832890009543673
1531	150.0	0.6122448979591837	0.10653409090909091	104.53910524340094	62.705364850626495	4.564546594841757
1532	80.0	0.7017543859649122	0.3463203463203463	62.692388155425114	36.81095269093121	3.22199658380087
1533	39.0	0.9069767441860465	0.4642857142857143	30.727922061357855	15.45730783636334	3.228525472521423
1534	110.0	0.6666666666666666	0.20676691729323307	79.8700576850888	45.69364961990309	3.6754900882380928
1535	37.0	0.74	0.3894736842105263	33.41421356237309	21.264528477520006	2.4374341058308233
1536	115.0	0.7986111111111112	0.14687100893997446	79.05382386916237	42.33911984839311	3.845512499034314
1537	122.0	0.6740331491712708	0.1450653983353151	83.39696961966999	43.356830071162086	5.7353027729715755
1538	156.0	0.48297213622291024	0.1875	113.25483399593905	60.134988240853346	7.117878097787803
1539	264.0	0.4086687306501548	0.09163484901076015	170.65180361560905	88.54245642665492	12.688584177438566
1540	80.0	0.8695652173913043	0.18140589569160998	57.29036790187178	31.51829298977292	3.5174148192715715
1541	163.0	0.5970695970695971	0.10976430976430976	111.61017305526642	61.43187371336047	5.476326192592133
1542	142.0	0.7171717171717171	0.4139941690962099	98.5208152801713	54.1002200665931	4.224196026575272
1543	172.0	0.5375	0.16165413533834586	123.25483399593905	66.0360322747947	5.864075768168272
1544	111.0	0.7207792207792207	0.1825657894736842	84.18376618407356	44.84118653452362	3.6888443992836373
1545	87.0	0.7310924369747899	0.2091346153846154	62.390872965260115	33.18978336553071	3.93592729129197
1546	105.0	0.7241379310344828	0.3181818181818182	71.38477631085024	38.45678096009953	3.9492343184047747
1547	81.0	0.7431192660550459	0.3068181818181818	63.10660171779822	36.8310207599986	3.0394812016694335
1548	54.0	0.8181818181818182	0.42857142857142855	40.27817459305203	23.253322317333392	3.0146664535620293
1549	112.0	0.49557522123893805	0.18421052631578946	76.56244584051393	39.62166441656116	8.010196606684412
1550	138.0	0.647887323943662	0.30666666666666664	94.21320343559641	52.47024613445715	4.3156208520799035
1551	195.0	0.5131578947368421	0.2727272727272727	134.45584412271572	75.92106893070611	5.994064331642459
1552	103.0	0.6058823529411764	0.23198198198198197	74.83452377915607	42.53456593174987	4.87443161787129
1553	90.0	0.625	0.40540540540540543	72.48528137423857	41.76618036485058	4.376255229021258
1554	146.0	0.6403508771929824	0.11587301587301588	93.53910524340095	55.71636772063703	4.751364584031306
1555	135.0	0.703125	0.5	93.55634918610404	50.454127432757424	4.517608776712708
1556	189.0	0.4315068493150685	0.1507177033492823	145.25483399593904	76.38759491613997	7.0430562328898265
1557	89.0	0.7007874015748031	0.3739495798319328	67.69238815542512	37.993648697063755	3.6314763084544897
1558	32.0	0.8205128205128205	0.3516483516483517	22.899494936611667	15.290063422916173	2.785827619074975
1559	63.0	0.7325581395348837	0.42	45.071067811865476	27.096099466113067	3.3517906107737008
1560	62.0	0.8611111111111112	0.7045454545454546	43.65685424949238	24.21342098063766	3.4772255739671993
1561	110.0	0.9166666666666666	0.15669515669515668	70.8111831820431	40.13455922706817	3.584811662726692
1562	137.0	0.5310077519379846	0.18121693121693122	88.42640687119285	41.52836019047509	9.86709697580565
1563	141.0	0.5778688524590164	0.1279491833030853	100.60407640085654	52.03221951272819	4.887515590962339
1564	147.0	0.7819148936170213	0.21212121212121213	81.74011537017762	42.272859840627625	4.9268985354111505
1565	162.0	0.6835443037974683	0.11739130434782609	113.98885271170677	61.81446303959253	4.244981185966146
1566	42.0	0.9333333333333333	0.8235294117647058	31.621320343559642	17.6474459322527	2.928604166322611
1567	185.0	0.48429319371727747	0.26811594202898553	134.1776695296637	77.98342927500623	6.102076332991415
1568	162.0	0.4807121661721068	0.12	115.3319984622144	60.289270391389984	7.397345308872049
1569	120.0	0.7272727272727273	0.18461538461538463	75.74011537017762	39.40672477184018	4.862331228809891
1570	36.0	0.8	0.631578947368421	34.242640687119284	21.604507361822446	2.426362908058424
1571	116.0	0.6904761904761905	0.17496229260935142	84.97665940288701	46.377259242822305	4.01735280729414
1572	417.0	0.27762982689747007	0.0528852251109702	275.81222920256965	141.68011493127696	21.09265151604067
1573	183.0	0.6332179930795848	0.13071428571428573	128.39696961967	66.37555028022734	4.533499905464091
1574	179.0	0.4637305699481865	0.2663690476190476	122.66904755831213	62.709321229675794	7.5928059962114745
1575	47.0	0.7833333333333333	0.373015873015873	34.89949493661167	20.892341913150933	3.1719757406469085
1576	130.0	0.6598984771573604	0.23550724637681159	92.21320343559643	52.44133995695911	3.7307065297273696
1577	129.0	0.645	0.2205128205128205	92.24873734152916	51.83606898836367	3.769820129029765
1578	66.0	0.825	0.2857142857142857	47.04163056034262	24.574532476211257	3.7143868217745513
1579	38.0	0.8636363636363636	0.4175824175824176	27.520815280171306	15.096325570416825	3.1825548075412695
1580	46.0	0.8518518518518519	0.4380952380952381	34.14213562373095	17.3975923897978	3.391382137162432
1581	105.0	0.6862745098039216	0.16203703703703703	70.49747468305833	37.77348015387458	5.117390851628914
1582	159.0	0.5501730103806228	0.14560439560439561	119.08326112068524	63.79089164729477	5.580067927178543
1583	123.0	0.6119402985074627	0.3037037037037037	90.7634559672906	53.17383231903014	4.3264521273300875
1584	92.0	0.8	0.16666666666666666	65.74011537017762	36.27730134946016	3.7553913852501712
1585	170.0	0.513595166163142	0.14096185737976782	134.31980515339464	78.8308871580527	3.9812560109259603
1586	94.0	0.7286821705426356	0.3560606060606061	66.93502884254441	37.12760203619091	3.7328414141535293
1587	306.0	0.3164426059979317	0.11127272727272727	229.4680374315355	127.54104422236489	12.836739817945212
1588	48.0	0.7619047619047619	0.6	36.44974746830583	22.67809263851824	3.130708626015352
1589	207.0	0.5686813186813187	0.09824394874228762	136.06601717798213	72.68599223629543	5.285121691548815
1590	130.0	0.7142857142857143	0.3073286052009456	94.55634918610406	52.88620895659435	3.5625139648476822
1591	239.0	0.3734375	0.15174603174603174	161.7401153701776	88.5959090128912	12.797188749023869
1592	141.0	0.7540106951871658	0.14842105263157895	95.63961030678928	50.21508672415941	3.8667401827073937
1593	136.0	0.6384976525821596	0.11992945326278659	101.05382386916236	55.68852586149725	4.176784267797204
1594	231.0	0.385	0.09637046307884856	154.71677477306463	76.57995001051913	14.180850962605117
1595	177.0	0.688715953307393	0.12334494773519164	111.6812408671319	59.87060033322993	5.032141189513636
1596	47.0	0.8245614035087719	0.46078431372549017	33.69238815542512	19.36549025939863	3.154102397500012
1597	133.0	0.5964125560538116	0.125	90.05382386916237	51.044589436959356	5.2926781700096
1598	196.0	0.7626459143968871	0.10359408033826638	124.06601717798213	67.19726690955241	4.62347806030128
1599	126.0	0.6057692307692307	0.4846153846153846	96.48528137423857	59.09660902053781	3.8666319434503076
1600	156.0	0.6190476190476191	0.4051948051948052	110.55634918610404	61.74615356339285	4.55468945121895
1601	127.0	0.6580310880829016	0.43197278911564624	87.55634918610406	47.842444220169526	4.265162273832529
1602	176.0	0.4009111617312073	0.22506393861892582	131.976659402887	47.95036407674097	14.936217083845508
1603	69.0	0.8023255813953488	0.30666666666666664	53.17766952966368	28.94624516332238	3.1735158175213725
1604	157.0	0.5376712328767124	0.16918103448275862	113.87005768508881	66.55246543435725	4.827695967359195
1605	35.0	0.8536585365853658	0.5	28.071067811865472	15.245875811160012	3.0108655843482386
1606	85.0	0.6910569105691057	0.3046594982078853	63.76345596729059	34.90998945096452	3.820601575032106
1607	108.0	0.75	0.2517482517482518	80.21320343559643	44.47551316461483	3.3581469951065395
1608	76.0	0.7307692307692307	0.19487179487179487	55.870057685088796	33.21648913177662	3.473688501928019
1609	37.0	0.8409090909090909	0.5285714285714286	27.27817459305202	15.059191678912995	3.2000731871139183
1610	107.0	0.656441717791411	0.15689149560117302	74.87615433949867	40.07725780975152	4.518125591109084
1611	258.0	0.6433915211970075	0.22933333333333333	159.18376618407356	84.80843150940738	4.660441734794952
1612	138.0	0.5287356321839081	0.1658653846153846	106.35533905932738	63.273193322176304	4.961409900921989
1613	256.0	0.534446764091858	0.08366013071895424	165.27922061357856	88.6114917056334	7.1930089355021325
1614	79.0	0.8404255319148937	0.24458204334365324	51.59797974644666	27.127983525550004	3.9162137728902424
1615	220.0	0.5929919137466307	0.10031919744642043	140.06601717798213	73.32871533246062	6.947762842628112
1616	133.0	0.7964071856287425	0.18472222222222223	87.49747468305833	44.077063292354794	4.084138012800876
1617	67.0	0.7790697674418605	0.27125506072874495	47.90559159102155	24.590299848082264	3.8813633436544186
1618	160.0	0.6015037593984962	0.40816326530612246	112.59188309203678	63.46168691403904	4.81760251831618
1619	62.0	0.9117647058823529	0.8611111111111112	43.86396103067892	27.041609121672188	3.08702639930207
1620	131.0	0.5822222222222222	0.12073732718894009	94.29646455628165	51.324821281512506	5.224308609864341
1621	72.0	0.8275862068965517	0.6666666666666666	50.828427124746185	29.24453837675321	3.3634105735345927
1622	159.0	0.501577287066246	0.3613636363636364	115.45584412271572	60.9006801248326	6.657380860595707
1623	103.0	0.7518248175182481	0.24641148325358853	76.97056274847714	43.60875067481501	3.1345131395743926
1624	91.0	0.6893939393939394	0.2394736842105263	71.31370849898477	44.11797593057364	2.897941556434274
1625	43.0	0.8113207547169812	0.5972222222222222	36.44974746830583	20.500075904993388	2.997745295471027
1626	46.0	0.8518518518518519	0.6052631578947368	34.03553390593274	20.49657027502718	2.8807854035336264
1627	93.0	0.8454545454545455	0.2246376811594203	58.840620433565945	30.283738884737613	4.188530656500178
1628	106.0	0.6424242424242425	0.53	75.69238815542512	44.381153391351916	4.35591058337502
1629	64.0	0.8	0.2807017543859649	45.45584412271571	23.946412413069392	3.592934217766327
1630	116.0	0.58	0.38666666666666666	95.27817459305203	56.00779977562545	4.0694436263222125
1631	119.0	0.40202702702702703	0.09296875	86.35533905932738	58.6475047459789	8.737759681726745
1632	69.0	0.8518518518518519	0.552	49.89949493661166	26.663736960795138	3.370550582132866
1633	121.0	0.8705035971223022	0.7202380952380952	83.44974746830583	46.69905462819675	3.4589542818940275
1634	136.0	0.8343558282208589	0.5964912280701754	79.31370849898477	41.933615585233824	4.386900310066045
1635	98.0	0.6853146853146853	0.56	71.31370849898477	40.853724206754336	4.019667261614783
1636	66.0	0.75	0.21568627450980393	49.94112549695428	26.659690781111333	4.042599882499009
1637	109.0	0.6646341463414634	0.3168604651162791	84.5208152801713	47.501792037881394	3.7483217089928376
1638	238.0	0.4075342465753425	0.21875	146.5685424949238	74.9798991695493	12.816055779316063
1639	177.0	0.7831858407079646	0.14496314496314497	101.81727983645297	53.87018659318572	4.864718044519501
1640	77.0	0.7623762376237624	0.1590909090909091	49.2193000900063	33.15142173600659	3.3552171489658837
1641	158.0	0.7149321266968326	0.1847953216374269	114.24873734152915	66.6170425642652	3.2900855952899053
1642	48.0	0.7741935483870968	0.2909090909090909	38.248737341529164	19.327695244397553	3.8246171755735494
1643	72.0	0.8571428571428571	0.21428571428571427	56.526911934581186	30.256445864233733	3.10136604079791
1644	259.0	0.3637640449438202	0.08604651162790698	171.65180361560905	91.46590806223364	11.665236069820661
1645	166.0	0.5460526315789473	0.20802005012531327	117.90559159102155	65.99283415584826	5.554359200306627
1646	211.0	0.5893854748603352	0.3256172839506173	150.97056274847714	92.44599667027425	4.14845503228956
1647	94.0	0.6762589928057554	0.1857707509881423	66.25483399593904	33.45852747695559	5.035141712614713
1648	163.0	0.6104868913857678	0.17121848739495799	119.59797974644665	65.4036245622862	4.603645338932983
1649	219.0	0.45625	0.142578125	145.39696961967	76.1944560792884	8.447873154097396
1650	41.0	0.6949152542372882	0.4270833333333333	30.899494936611667	19.019050179417327	3.579761887982205
1651	83.0	0.5533333333333333	0.29642857142857143	65.69238815542512	38.96023872009954	4.728075505677479
1652	131.0	0.7237569060773481	0.13760504201680673	89.88225099390856	48.14886651566081	4.370365053682179
1653	156.0	0.47129909365558914	0.11079545454545454	115.78174593052023	60.16735544223799	8.416144153598747
1654	93.0	0.5923566878980892	0.3795918367346939	67.72792206135786	38.759467402852714	4.884883464547074
1655	46.0	0.7931034482758621	0.30666666666666664	33.59188309203678	18.580839650844528	3.5884762190528408
1656	63.0	0.875	0.2550607287449393	45.11269837220809	23.857469635395752	3.401462306297598
1657	231.0	0.7	0.09685534591194969	143.9655121145938	77.58038384547748	4.597332863800686
1658	99.0	0.7333333333333333	0.18198529411764705	71.35533905932738	37.91046835094942	4.119025621004735
1659	86.0	0.7413793103448276	0.28104575163398693	63.520815280171306	39.40903458619625	3.0148235741108413
1660	223.0	0.5296912114014252	0.14518229166666666	146.60407640085654	75.78695850603296	6.880605489574336
1661	152.0	0.5223367697594502	0.37254901960784315	104.21320343559643	57.628442812152585	6.336040130177793
1662	92.0	0.7419354838709677	0.2697947214076246	68.04163056034261	36.00833510598401	3.58333037569242
1663	66.0	0.8354430379746836	0.20952380952380953	48.11269837220809	27.966125721044076	3.18001961237755
1664	137.0	0.6199095022624435	0.18218085106382978	102.35533905932738	55.47494769414906	4.364309920446313
1665	118.0	0.7375	0.31216931216931215	84.14213562373095	48.22814749732517	3.3474207861658734
1666	119.0	0.7727272727272727	0.26153846153846155	79.69848480983501	41.89831444057882	3.8911010366049084
1667	106.0	0.7794117647058824	0.18339100346020762	77.59797974644665	41.26642283120416	3.503154857736516
1668	67.0	0.67	0.5403225806451613	55.656854249492376	35.356548670810135	3.152825246214107
1669	184.0	0.5696594427244582	0.20444444444444446	126.94112549695427	67.54556555398493	5.784298158225476
1670	161.0	0.5729537366548043	0.11103448275862068	122.25483399593904	72.18433502064572	3.577779381086002
1671	54.0	0.8181818181818182	0.32142857142857145	43.55634918610404	23.41995937137063	2.972095120993334
1672	163.0	0.7117903930131004	0.13230519480519481	109.53910524340095	58.27249778868774	4.123319423625843
1673	41.0	0.6507936507936508	0.24260355029585798	34.10660171779821	19.48379699463933	3.7128938721794573
1674	58.0	0.8169014084507042	0.22745098039215686	42.077164466275356	22.96945882112773	3.57620149216393
1675	115.0	0.6117021276595744	0.32670454545454547	86.97056274847714	50.18556985227199	4.729255383834424
1676	68.0	0.7555555555555555	0.20923076923076922	51.041630560342625	28.91702624215518	3.518520679799466
1677	57.0	0.7916666666666666	0.6477272727272727	42.86396103067892	24.702089296373277	3.3747310459554596
1678	144.0	0.7539267015706806	0.13793103448275862	95.53910524340094	50.71379262491888	4.147656999364557
1679	91.0	0.7777777777777778	0.3939393939393939	63.72792206135785	36.86000364335137	3.2529259719204138
1680	82.0	0.7068965517241379	0.3037037037037037	60.349242404917504	34.07030820192494	3.7194042737199835
1681	101.0	0.7266187050359713	0.23218390804597702	68.76955262170047	35.072354582318326	4.511282235971238
1682	156.0	0.8	0.12400635930047695	101.88834764831844	55.401674253417546	3.816680160316509
1683	100.0	0.7936507936507936	0.1724137931034483	66.04772721475248	37.07471709294064	3.7409828225234225
1684	100.0	0.819672131147541	0.17857142857142858	68.08326112068522	36.82804793653309	3.6071713550122264
1685	120.0	0.6629834254143646	0.16483516483516483	74.49747468305833	40.2641764787922	5.518804544082741
1686	176.0	0.704	0.14035087719298245	104.02438661763952	54.9511600162235	4.909319487472651
1687	198.0	0.48058252427184467	0.11192764273600904	140.29646455628165	77.24433944912741	6.203954047279838
1688	145.0	0.5918367346938775	0.44753086419753085	102.3492424049175	60.409602024980444	5.229563116473998
1689	96.0	0.6357615894039735	0.21428571428571427	70.11269837220809	38.259832508344616	4.766361562505357
1690	102.0	0.5604395604395604	0.31097560975609756	80.9350288425444	45.30827161707443	4.10832373593369
1691	126.0	0.7241379310344828	0.2930232558139535	86.97056274847714	47.910591398030945	3.89724063914629
1692	139.0	0.41002949852507375	0.2808080808080808	111.59188309203678	64.77098677159051	8.151269837724811
1693	149.0	0.7487437185929648	0.45151515151515154	106.86396103067892	63.11184568924921	3.198213144320157
1694	155.0	0.6888888888888889	0.543859649122807	114.89949493661166	67.03451410190367	3.946749644113657
1695	74.0	0.6915887850467289	0.5103448275862069	54.48528137423857	32.07314248182014	3.7045984893911266
1696	111.0	0.7602739726027398	0.16517857142857142	79.7401153701776	41.56068161871805	3.807313671036563
1697	148.0	0.6406926406926406	0.4327485380116959	106.72792206135784	62.564785071723065	3.455514934891408
1698	93.0	0.7948717948717948	0.16034482758620688	64.01219330881976	38.128084915796414	3.185933093226153
1699	91.0	0.728	0.263768115942029	56.148232278140824	29.377957639877245	4.940752026038758
1700	92.0	0.467005076142132	0.16696914700544466	72.59797974644667	37.57631769650492	6.918068216057917
1701	158.0	0.7149321266968326	0.11755952380952381	102.36753236814714	58.16190561926184	3.909566111014364
1702	122.0	0.7218934911242604	0.26521739130434785	89.17766952966369	51.74108929907535	3.256352705437152
1703	112.0	0.6473988439306358	0.26666666666666666	77.97056274847714	46.121848803018786	4.164605688717113
1704	63.0	0.7241379310344828	0.63	45.071067811865476	28.08602343038758	3.358586036267111
1705	35.0	0.8536585365853658	0.4166666666666667	28.863961030678926	16.240455327887155	2.8051444227878366
1706	163.0	0.5620689655172414	0.11319444444444444	116.1604255869606	61.566433174111644	5.078345666824511
1707	148.0	0.43529411764705883	0.1522633744855967	98.84062043356593	48.637165262162405	10.571831812360847
1708	53.0	0.7571428571428571	0.38405797101449274	42.69238815542512	25.918485250577557	2.8165730084180196
1709	62.0	0.8051948051948052	0.30392156862745096	43.4558441227157	22.223260542940206	3.9874608219088237
1710	115.0	0.6388888888888888	0.2875	84.83452377915607	44.55723843665395	4.407412134931974
1711	44.0	0.7213114754098361	0.4074074074074074	32.48528137423857	20.399662987237882	3.245217397576023
1712	119.0	0.7727272727272727	0.6329787234042553	89.65685424949237	53.97447267232891	3.236199378698739
1713	132.0	0.4370860927152318	0.16944801026957637	95.25483399593904	48.56319723312298	8.736931068036071
1714	79.0	0.7117117117117117	0.398989898989899	60.86396103067893	38.58983510412975	2.929073849483197
1715	150.0	0.7142857142857143	0.12406947890818859	102.61017305526642	55.89399753192929	4.281689167011673
1716	132.0	0.4489795918367347	0.1736842105263158	93.84062043356595	47.953603919490725	9.446727909394228
1717	160.0	0.6896551724137931	0.48484848484848486	109.31370849898477	61.52407062329131	3.930408240916256
1718	125.0	0.4716981132075472	0.35014005602240894	91.76345596729058	59.625775880982275	5.3627100043610705
1719	98.0	0.7480916030534351	0.5025641025641026	74.27817459305203	41.846018794212114	3.132145627302761
1720	98.0	0.7967479674796748	0.17785843920145192	73.0477272147525	38.25154302563641	3.4080724804654636
1721	127.0	0.5799086757990868	0.1411111111111111	96.01219330881976	54.573890098419504	4.35419821122962
1722	136.0	0.5811965811965812	0.38857142857142857	98.17766952966369	56.875384835623294	5.223659690389291
1723	41.0	0.7454545454545455	0.45555555555555555	33.44974746830583	20.05188079283791	2.9763104814640413
1724	172.0	0.6615384615384615	0.13782051282051283	120.81118318204308	63.64906429862122	4.602591688815244
1725	139.0	0.6780487804878049	0.1354775828460039	96.9177848998413	50.09473471533727	4.509923022735899
1726	141.0	0.7421052631578947	0.15666666666666668	91.05382386916237	48.14083733952136	4.28278894296505
1727	283.0	0.5154826958105647	0.0760752688172043	181.4213562373095	98.4623446409916	7.107305336648025
1728	191.0	0.5895061728395061	0.29890453834115804	139.3492424049175	78.86984673050533	4.214110729861553
1729	98.0	0.6163522012578616	0.3798449612403101	82.31370849898477	51.20963350475058	3.4567489221030034
1730	98.0	0.7050359712230215	0.5025641025641026	71.65685424949238	44.78458484166496	3.4892973927173574
1731	105.0	0.7835820895522388	0.1674641148325359	77.66904755831213	40.700897164968524	3.5296296065452797
1732	52.0	0.8253968253968254	0.7536231884057971	42.03553390593274	25.977111721213625	3.0157904548182146
1733	185.0	0.6981132075471698	0.10743321718931476	119.373629022557	63.7615599846596	4.5238954988834825
1734	272.0	0.6031042128603105	0.1619047619047619	156.51576464628795	55.18759241439087	11.127293818558037
1735	143.0	0.6137339055793991	0.5070921985815603	98.00609665440987	52.42229692934713	5.809703526056513
1736	113.0	0.6108108108108108	0.2627906976744186	86.17766952966369	49.79067223271057	4.121491880480866
1737	43.0	0.8269230769230769	0.38392857142857145	32.72792206135786	18.130002748126092	3.155878874808785
1738	189.0	0.5135869565217391	0.21699196326061998	137.8050865276332	75.91358473492232	5.445503267226766
1739	224.0	0.36304700162074555	0.09523809523809523	153.095454429505	78.12688321972443	12.980880406453258
1740	242.0	0.4879032258064516	0.12906666666666666	168.46803743153546	88.60218101265785	6.9453415689894005
1741	159.0	0.5658362989323843	0.3271604938271605	112.62741699796952	61.464715209773864	5.871083677390799
1742	133.0	0.5990990990990991	0.36538461538461536	103.76345596729058	59.62498428445829	4.2049280381087435
1743	109.0	0.7124183006535948	0.1963963963963964	81.94112549695427	43.54035938137787	3.784545938917217
1744	101.0	0.7890625	0.20486815415821502	67.59797974644665	36.87521792898853	3.742559926325939
1745	69.0	0.7666666666666667	0.1513157894736842	50.31980515339464	33.91443180536934	3.0361427206143685
1746	147.0	0.7277227722772277	0.10888888888888888	100.88225099390856	58.29640142909489	3.5525884882512218
1747	147.0	0.38992042440318303	0.08791866028708134	108.39696961966999	66.7779380717127	9.955766113085534
1748	198.0	0.7122302158273381	0.15602836879432624	115.88225099390857	60.65086810205349	5.177721195043764
1749	487.0	0.41910499139414803	0.05892316999395039	273.30360723121805	143.58644398976938	12.549493103270475
1750	206.0	0.6204819277108434	0.10177865612648221	126.61626970967629	70.83420836786496	4.917538870407259
1751	130.0	0.7558139534883721	0.12596899224806202	99.9827560572969	53.446358933483495	3.2670265250497126
1752	105.0	0.7777777777777778	0.1669316375198728	83.56244584051393	44.90314884161323	3.0661955537257657
1753	96.0	0.5962732919254659	0.48	76.10660171779821	46.326232509566154	4.1405398631706225
1754	53.0	0.7794117647058824	0.42063492063492064	40.14213562373095	20.95624833683348	3.6967342782798736
1755	147.0	0.5764705882352941	0.294	105.00609665440987	55.996864916055024	5.429386938790877
1756	129.0	0.6825396825396826	0.17647058823529413	94.39087296526012	51.0733301137684	3.7618574515055143
1757	156.0	0.5864661654135338	0.15757575757575756	100.63961030678928	45.82467061126731	6.786808756646546
1758	153.0	0.4026315789473684	0.20647773279352227	116.07716446627536	64.67918590402431	8.043735215977847
1759	211.0	0.2922437673130194	0.10859495625321668	150.7462120245875	81.54633141858616	15.419074673781001
1760	129.0	0.542016806722689	0.3115942028985507	95.21320343559643	50.928967035212	5.914749563813455
1761	123.0	0.43617021276595747	0.2847222222222222	100.3492424049175	62.639994206904454	7.349398792332274
1762	43.0	0.7543859649122807	0.3161764705882353	35.10660171779821	20.796727853678263	2.8440927234208147
1763	86.0	0.7226890756302521	0.6323529411764706	63.69238815542512	38.24867029849358	3.23928683287989
1764	69.0	0.6571428571428571	0.41818181818181815	61.242640687119284	38.73120776334842	3.313271977257443
1765	159.0	0.7327188940092166	0.11927981995498875	110.98885271170678	58.62361099671684	3.864509103674891
1766	102.0	0.7727272727272727	0.17346938775510204	71.49747468305833	37.18817833533632	3.9663840657125906
1767	55.0	0.7142857142857143	0.35714285714285715	40.86396103067892	24.491052483337274	3.6233290697472396
1768	37.0	0.8409090909090909	0.4065934065934066	27.520815280171306	15.261176369586053	3.080974722279408
1769	152.0	0.6359832635983264	0.1314878892733564	100.95331880577403	53.17368049093579	5.668973926094881
1770	68.0	0.68	0.272	53.97056274847714	30.528111506101983	3.5867614498309437
1771	155.0	0.6431535269709544	0.15376984126984128	101.77564927611036	54.17664506854655	4.835566191941414
1772	52.0	0.9454545454545454	0.36363636363636365	33.45584412271572	16.71304161566593	4.062344436391708
1773	191.0	0.6631944444444444	0.09744897959183674	136.92388155425118	73.81311970016229	3.8953294798949503
1774	112.0	0.6588235294117647	0.19444444444444445	80.14823227814082	43.79592176142815	4.124669724010688
1775	97.0	0.708029197080292	0.6381578947368421	70.69238815542512	42.48511906810522	3.3363366116387767
1776	130.0	0.5990783410138248	0.35714285714285715	96.10660171779821	57.27982211044103	4.463232072690496
1777	129.0	0.57847533632287	0.12609970674486803	86.22539674441619	48.41390050316579	5.065713333615258
1778	156.0	0.7027027027027027	0.14634146341463414	100.71067811865474	51.83362864901661	4.753917058661319
1779	91.0	0.7520661157024794	0.18383838383838383	73.31980515339464	39.57434271143012	3.1576738034495513
1780	67.0	0.7528089887640449	0.3544973544973545	49.69238815542512	30.150675308788575	3.0969771026414517
1781	113.0	0.3575949367088608	0.20925925925925926	85.04163056034261	54.515423090658345	10.286523041390241
1782	133.0	0.39349112426035504	0.16792929292929293	90.01219330881975	44.74920084087772	11.038744094456359
1783	175.0	0.6433823529411765	0.1023391812865497	122.37362902255701	65.59331624045852	4.966493372182609
1784	44.0	0.8148148148148148	0.34375	35.3492424049175	19.05901259188927	2.968482821556424
1785	111.0	0.5967741935483871	0.3964285714285714	79.5208152801713	44.70169514748818	5.288724708763168
1786	149.0	0.4331395348837209	0.18192918192918192	123.62741699796952	70.14071654307902	6.768767244920492
1787	135.0	0.4166666666666667	0.15625	95.25483399593904	46.366901499707126	10.865853351099297
1788	87.0	0.8285714285714286	0.2265625	59.597979746446654	31.10985801317793	3.771546242761799
1789	38.0	0.8260869565217391	0.5066666666666667	29.071067811865476	15.77156851596178	3.470494222359579
1790	151.0	0.6291666666666667	0.1432637571157495	97.29646455628166	49.5817562265135	6.664598410711627
1791	114.0	0.41454545454545455	0.14615384615384616	88.97665940288701	49.652126884008766	7.617890433107692
1792	67.0	0.6836734693877551	0.25769230769230766	51.97056274847714	30.9481988671174	3.422181458129669
1793	103.0	0.7304964539007093	0.17166666666666666	70.32590180780451	37.97929801981855	4.3996238953177285
1794	173.0	0.7654867256637168	0.12401433691756272	111.78174593052023	60.49235953839898	4.043588060802923
1795	152.0	0.7755102040816326	0.13092161929371232	106.12489168102783	55.363173861949605	3.8390405063118536
1796	133.0	0.7348066298342542	0.131163708086785	95.01828996322963	50.75691844638657	3.7732412841508673
1797	366.0	0.20021881838074398	0.08454608454608455	261.651803615609	141.99281119086456	23.500491672084124
1798	78.0	0.6964285714285714	0.33766233766233766	60.86396103067892	37.64169748420065	3.032919383783185
1799	36.0	0.9230769230769231	0.3673469387755102	27.727922061357855	15.394187897652552	3.054115411551484
1800	185.0	0.7581967213114754	0.14682539682539683	106.61017305526642	56.47562646823351	4.718662647692207
1801	181.0	0.41418764302059496	0.16712834718374883	123.91168824543144	64.22092269931245	10.603794768485603
1802	36.0	0.8780487804878049	0.6923076923076923	27.071067811865476	14.00960991399808	3.4087708850105494
1803	239.0	0.48676171079429736	0.09032501889644746	150.51576464628795	79.52205816580394	8.514464878723166
1804	134.0	0.5254901960784314	0.1731266149870801	96.42640687119285	52.37328573417048	5.604945783568409
1805	293.0	0.34839476813317477	0.08429228998849252	197.61626970967632	102.05241528385739	11.437426337307938
1806	101.0	0.7062937062937062	0.5489130434782609	87.03553390593274	50.09757436883383	3.131144328826588
1807	108.0	0.9	0.8372093023255814	82.03553390593274	46.53924847979476	2.99604170329951
1808	114.0	0.5428571428571428	0.1357142857142857	79.14823227814082	49.73901819602761	5.4038418056580255
1809	132.0	0.6534653465346535	0.15511163337250294	91.39696961966999	47.85956072375415	4.811278181784168
1810	105.0	0.6	0.2328159645232816	80.17766952966367	47.926111223885705	3.810662795052309
1811	146.0	0.7525773195876289	0.5725490196078431	99.89949493661166	58.29588814422076	3.4833881405269254
1812	58.0	0.7435897435897436	0.29	45.420310216782966	24.112913737444412	3.436389151552749
1813	213.0	0.2886178861788618	0.09757214841960604	151.81118318204307	76.79851932494375	16.531568895520646
1814	207.0	0.46621621621621623	0.09857142857142857	133.88834764831844	70.33647382798719	9.69996038377404
1815	162.0	0.6835443037974683	0.12272727272727273	110.36753236814714	58.505525209082826	4.427336668970879
1816	112.0	0.6706586826347305	0.18823529411764706	79.76955262170047	43.27656672737399	4.445789896222138
1817	141.0	0.5145985401459854	0.29375	98.83452377915606	55.96538361868876	6.792295643076709
1818	61.0	0.8243243243243243	0.305	46.21320343559643	24.109027295379274	3.3655151385387025
1819	42.0	0.75	0.525	32.071067811865476	17.327916714408513	3.7888714990721457
1820	59.0	0.686046511627907	0.3933333333333333	47.86396103067893	27.838194459843407	3.4653697209245085
1821	150.0	0.5376344086021505	0.16339869281045752	113.2193000900063	59.04926263894981	6.172790078390886
1822	126.0	0.6363636363636364	0.12701612903225806	92.12489168102786	50.400962212466254	5.0648602167254495
1823	32.0	0.7804878048780488	0.2857142857142857	21.86396103067893	16.753441607360536	2.7001748663300997
1824	85.0	0.5704697986577181	0.1574074074074074	66.698484809835	38.4703480694119	4.512765558092887
1825	151.0	0.648068669527897	0.1391705069124424	94.91778489984131	50.037818827384704	5.157221488189465
1826	32.0	0.9142857142857143	0.3950617283950617	24.970562748477143	13.14873852906222	3.1748110328576518
1827	99.0	0.7443609022556391	0.225	57.59797974644666	29.486611542112268	5.5194417530060775
1828	339.0	0.2526080476900149	0.06860959319975714	222.10764773832472	120.44606282162022	16.067378807561713
1829	138.0	0.770949720670391	0.30666666666666664	97.55634918610404	54.62059639439371	3.302412672870219
1830	32.0	0.8421052631578947	0.6666666666666666	24.035533905932738	13.02470923023948	3.114594591229244
1831	137.0	0.5131086142322098	0.13391984359726294	98.22539674441617	50.30715562640688	7.91094355557645
1832	96.0	0.7058823529411765	0.5485714285714286	68.10660171779821	38.52581554560378	3.590507607490591
1833	102.0	0.6891891891891891	0.2125	79.76345596729058	44.61724380024925	3.639320606551548
1834	129.0	0.6548223350253807	0.26326530612244897	96.14213562373095	55.27196340878155	3.8240902042105542
1835	111.0	0.6686746987951807	0.20555555555555555	73.84062043356595	38.46438376390038	4.844902732061317
1836	172.0	0.37310195227765725	0.20046620046620048	110.08326112068522	43.53281128859659	19.52709752200192
1837	130.0	0.7222222222222222	0.1570048309178744	88.18986283848345	46.760477418452275	4.148914465662774
1838	92.0	0.647887323943662	0.14935064935064934	65.42640687119285	37.370162135961635	4.694675712078501
1839	251.0	0.6640211640211641	0.33466666666666667	156.6274169979695	84.28572088144399	5.144478543924809
1840	106.0	0.6463414634146342	0.42063492063492064	74.97056274847714	39.82485421463911	5.5893847373214225
1841	56.0	0.7368421052631579	0.3181818181818182	40.69238815542512	25.317753551880276	3.156807995255107
1842	183.0	0.6512455516014235	0.10664335664335664	117.95941546018392	64.60890791271703	5.2571019286313465
1843	120.0	0.9090909090909091	0.20066889632107024	69.98275605729691	36.95613012300789	4.2314958870852815
1844	73.0	0.6636363636363637	0.2796934865900383	53.72792206135785	34.29419080174269	3.3294231070422335
1845	87.0	0.6641221374045801	0.26851851851851855	61.66295090390226	31.984419000608785	4.913653260006028
1846	132.0	0.7542857142857143	0.1213235294117647	92.16042558696059	51.70557554877681	3.7586673460686773
1847	101.0	0.6688741721854304	0.4122448979591837	71.72792206135784	41.42706099222254	4.106294020482395
1848	49.0	0.7538461538461538	0.30246913580246915	33.520815280171306	22.20458796722262	3.2679843587402977
1849	155.0	0.842391304347826	0.14761904761904762	93.78174593052023	50.59688309684852	4.095270167068937
1850	115.0	0.6052631578947368	0.14375	82.9827560572969	43.86793261848962	5.585488562932376
1851	98.0	0.7101449275362319	0.3983739837398374	78.86396103067892	46.263802212136994	3.0328695165368678
1852	68.0	0.6666666666666666	0.21794871794871795	52.17766952966369	29.905781200483013	3.5142756212024655
1853	174.0	0.6327272727272727	0.11507936507936507	114.5096679918781	61.771133091666144	5.211752643191399
1854	109.0	0.7730496453900709	0.21372549019607842	78.35533905932738	40.48726466108811	3.8725140843237678
1855	138.0	0.6388888888888888	0.22115384615384615	97.17766952966369	60.97024288111246	3.4686754591883147
1856	51.0	0.8225806451612904	0.31875	40.55634918610404	22.21596765787306	2.959062052282681
1857	85.0	0.5862068965517241	0.22546419098143236	61.83452377915607	35.512473737650396	4.924873809862696
1858	98.0	0.5414364640883977	0.2545454545454545	75.45584412271572	40.50191757297011	5.386317435835209
1859	135.0	0.45302013422818793	0.25471698113207547	103.87005768508881	60.10477731728373	6.8564746280874305
1860	267.0	0.30067567567567566	0.163003663003663	187.18986283848346	104.92939323069166	14.056408632544521
1861	108.0	0.675	0.21951219512195122	80.59188309203678	45.941097643819475	3.6178823444486863
1862	48.0	0.7741935483870968	0.4444444444444444	36.89949493661167	20.00176885385618	3.270035413538785
1863	95.0	0.6884057971014492	0.13031550068587106	67.66904755831213	40.857315077957715	3.940179231547951
1864	117.0	0.536697247706422	0.11818181818181818	77.49747468305833	48.01836041945301	5.4277955959024915
1865	232.0	0.3879598662207358	0.23015873015873015	165.31980515339464	93.5616355572814	8.213653832374645
1866	96.0	0.4948453608247423	0.210989010989011	72.07716446627535	41.90030152998203	6.5785960615491454
1867	72.0	0.576	0.17142857142857143	56.248737341529164	33.87719662484679	4.1898310996910775
1868	123.0	0.6507936507936508	0.4392857142857143	85.42031021678297	44.787273798731555	4.520942950669684
1869	75.0	0.7211538461538461	0.46296296296296297	52.72792206135786	30.592563424565988	3.6675812196591124
1870	47.0	0.8703703703703703	0.25824175824175827	32.04163056034261	19.893921561010167	3.0582272799688477
1871	107.0	0.7181208053691275	0.15922619047619047	78.32590180780451	41.577952539021915	3.6815129693692232
1872	117.0	0.612565445026178	0.4875	90.48528137423857	52.77456990826824	4.250829332843004
1873	132.0	0.4647887323943662	0.17959183673469387	89.39087296526012	44.88317528242674	8.687679965245493
1874	47.0	0.8545454545454545	0.5875	34.82842712474619	20.492483805206334	2.893332233547002
1875	105.0	0.5932203389830508	0.1383399209486166	74.66904755831214	44.94900808667188	4.432973327595373
1876	58.0	0.8169014084507042	0.58	46.03553390593274	26.98341472074633	2.7655027381391
1877	155.0	0.6458333333333334	0.270979020979021	107.04163056034261	57.452380990143	4.11662775564472
1878	79.0	0.5031847133757962	0.2051948051948052	66.69238815542512	40.71832092907332	3.8439447991728652
1879	111.0	0.7254901960784313	0.23717948717948717	78.66295090390226	41.303195445860744	3.727044908743679
1880	146.0	0.5910931174089069	0.12575366063738158	105.29646455628165	55.96790217444182	5.817000867723324
1881	202.0	0.6234567901234568	0.10455486542443064	129.82337649086284	68.35389795479479	6.0130809875713025
1882	49.0	0.7205882352941176	0.3888888888888889	36.86396103067893	24.500334158581765	2.8867587744657506
1883	133.0	0.4463087248322148	0.1933139534883721	98.1126983722081	50.71618263043743	7.9466945684897885
1884	103.0	0.6645161290322581	0.21020408163265306	74.07716446627535	41.11606644319842	3.890157782874457
1885	132.0	0.7457627118644068	0.1527777777777778	91.01828996322963	47.13426662608758	4.005623982205365
1886	171.0	0.5428571428571428	0.18114406779661016	120.90559159102153	71.59444223621813	5.087363781734807
1887	45.0	0.8653846153846154	0.7894736842105263	35.03553390593274	20.793011037357655	2.884154351159155
1888	145.0	0.40502793296089384	0.24247491638795987	102.01219330881976	51.946410357083295	11.429912011377223
1889	85.0	0.5743243243243243	0.27419354838709675	67.2842712474619	35.93776812976761	5.237409194349075
1890	185.0	0.8149779735682819	0.11031604054859868	112.16652224137047	62.75094500884701	3.936324328399802
1891	66.0	0.7857142857142857	0.3142857142857143	45.42031021678298	24.001797308123017	3.740681423657432
1892	132.0	0.7135135135135136	0.22448979591836735	93.35533905932738	49.0607314394701	4.077937093237662
1893	155.0	0.6858407079646017	0.256198347107438	110.59188309203678	63.4721545374231	3.5743129188111626
1894	184.0	0.4144144144144144	0.11428571428571428	123.98885271170677	64.53708687409014	10.209425851547298
1895	95.0	0.7142857142857143	0.18627450980392157	68.76955262170048	38.02226902134987	4.224990979020794
1896	46.0	0.8070175438596491	0.5411764705882353	32.86396103067893	18.96900950741559	3.208407794531124
1897	144.0	0.6371681415929203	0.16	89.63961030678928	46.77575878685481	6.144027093553541
1898	100.0	0.7692307692307693	0.1594896331738437	77.46194077712559	41.67384510099994	3.230763763858793
1899	49.0	0.8305084745762712	0.5157894736842106	38.071067811865476	20.558031299186144	3.1623438548069265
1900	43.0	0.8269230769230769	0.4095238095238095	32.9350288425444	17.452648299758454	3.157653958270135
1901	116.0	0.8529411764705882	0.17901234567901234	73.39696961966999	38.85616191736792	4.027416559389466
1902	164.0	0.4880952380952381	0.31417624521072796	118.45584412271572	66.0241271218953	6.520384278630018
1903	80.0	0.851063829787234	0.21390374331550802	55.840620433565945	29.288057316087862	3.6752140957435944
1904	191.0	0.5601173020527859	0.1646551724137931	124.87615433949868	67.77860477013589	6.593611950640112
1905	177.0	0.5221238938053098	0.12976539589442815	122.39087296526012	73.68512329248851	5.876260631331293
1906	46.0	0.7931034482758621	0.45098039215686275	34.48528137423857	19.854646950423216	3.0659092887846056
1907	32.0	0.8888888888888888	0.7111111111111111	27.621320343559642	16.10307036545855	2.4629504268439244
1908	174.0	0.759825327510917	0.10881801125703565	108.71677477306464	60.08221161972537	4.204346835114705
1909	99.0	0.559322033898305	0.1767857142857143	74.11269837220809	44.56569695543057	4.2535294340514325
1910	175.0	0.5737704918032787	0.08928571428571429	129.12489168102783	76.49209090442801	4.1029561875417
1911	142.0	0.5399239543726235	0.15026455026455027	101.08326112068522	55.46085399884459	6.379274385190687
1912	93.0	0.62	0.36904761904761907	68.9350288425444	41.30169457520353	4.0270295578243855
1913	254.0	0.3009478672985782	0.11374832064487236	173.64570696119915	92.14762011489466	17.131489733958645
1914	136.0	0.6903553299492385	0.18888888888888888	97.35533905932738	53.00531295701217	3.9490635380389283
1915	167.0	0.5284810126582279	0.14804964539007093	111.60407640085656	56.974333130676925	6.468974228775764
1916	55.0	0.7857142857142857	0.4782608695652174	41.656854249492376	26.24527445297526	2.8101554844317644
1917	65.0	0.7831325301204819	0.5	48.48528137423857	28.48658311339306	3.1971181980449312
1918	81.0	0.6585365853658537	0.3103448275862069	61.14213562373095	32.526724627667384	4.491078147064612
1919	45.0	0.8490566037735849	0.6521739130434783	39.621320343559645	24.13660593783816	2.3647737811646548
1920	270.0	0.5510204081632653	0.06448531167900645	187.52186130069782	106.12098173994124	4.881026785393291
1921	96.0	0.6620689655172414	0.14814814814814814	69.11879502661796	39.303773268785115	4.422347435009208
1922	109.0	0.6526946107784432	0.34935897435897434	78.97056274847714	44.212964037443065	4.137698983796787
1923	37.0	0.8809523809523809	0.7254901960784313	31.621320343559642	18.869653774796397	2.5589630826693686
1924	198.0	0.5454545454545454	0.11884753901560624	124.6812408671319	65.97895521016011	6.971321559679399
1925	158.0	0.6196078431372549	0.12392156862745098	112.36143571373725	63.29478080586398	4.1110814055375435
1926	142.0	0.71	0.11952861952861953	105.46803743153546	57.79717621799358	3.5446831586129646
1927	59.0	0.8194444444444444	0.36875	44.384776310850235	23.040092078869918	3.3897296810105892
1928	268.0	0.5095057034220533	0.07326407873154729	177.2436867076458	92.79906801878802	6.9646135465365555
1929	139.0	0.6405529953917051	0.13200379867046533	97.88225099390857	52.1257482248232	4.351858047699606
1930	86.0	0.6231884057971014	0.18859649122807018	61.18376618407356	32.33520108497859	5.287918574881117
1931	57.0	0.7702702702702703	0.2878787878787879	43.62741699796952	22.95062523944286	3.571816719786172
1932	33.0	0.8918918918918919	0.7333333333333333	27.621320343559642	16.02790271759982	2.5917149630012686
1933	67.0	0.6767676767676768	0.32211538461538464	52.520815280171306	29.12024420626883	3.8875675914444128
1934	97.0	0.7028985507246377	0.3464285714285714	71.14213562373095	39.73277461051231	3.6493389808457026
1935	88.0	0.6330935251798561	0.43137254901960786	63.10660171779821	38.08138695423281	3.7806751820368985
1936	162.0	0.5934065934065934	0.1134453781512605	114.61017305526642	60.69259561922417	5.093342699201116
1937	104.0	0.6380368098159509	0.16993464052287582	75.35533905932738	42.96406235131049	4.67563210933211
1938	119.0	0.7828947368421053	0.24740124740124741	82.69848480983498	42.65663268835277	3.754581123734396
1939	259.0	0.29465301478953354	0.09343434343434344	185.12489168102783	106.01980070778967	12.598386630588875
1940	118.0	0.48559670781893005	0.22138836772983114	86.73401871576773	47.2816259579666	7.611867135582164
1941	300.0	0.33407572383073497	0.10989010989010989	206.33809511662426	105.17847953662911	12.53228976713093
1942	248.0	0.4575645756457565	0.09979879275653923	162.40306627407986	83.86000822245124	8.261611455644887
1943	85.0	0.7657657657657657	0.2361111111111111	58.97665940288701	29.882702981308707	4.035977506626859
1944	62.0	0.8493150684931506	0.7045454545454546	44.65685424949238	24.03004473868712	3.3908165154273475
1945	333.0	0.39737470167064437	0.08024096385542169	208.03657992645924	111.09971532217077	9.408419733441253
1946	170.0	0.3794642857142857	0.17418032786885246	123.5269119345812	73.54757744951016	9.778421095881198
1947	185.0	0.5910543130990416	0.09973045822102426	133.8528137423857	72.71337841871545	4.2626425155907715
1948	69.0	0.6448598130841121	0.24125874125874125	51.2842712474619	28.02402474928831	4.493592008005413
1949	42.0	0.875	0.4375	34.14213562373095	17.28220752856428	3.084765652381425
1950	118.0	0.59	0.22868217054263565	87.24873734152916	48.59289013470924	4.38412395620866
1951	144.0	0.4298507462686567	0.2099125364431487	105.49137802864846	57.84666087770831	8.780147253505408
1952	118.0	0.6900584795321637	0.17027417027417027	78.49747468305831	41.95770965228925	4.837718115287217
1953	123.0	0.6721311475409836	0.128125	96.22539674441619	50.92648038904805	3.7268917113458735
1954	46.0	0.8214285714285714	0.6052631578947368	34.03553390593274	21.152172547092064	2.8569487367397106
1955	105.0	0.6907894736842105	0.33653846153846156	76.14213562373095	43.38330882342194	3.803720385915707
1956	160.0	0.54421768707483	0.2465331278890601	118.42031021678298	64.91249653103381	5.736313634079119
1957	168.0	0.5694915254237288	0.11839323467230443	114.02438661763951	58.882629556409576	5.911315105220549
1958	157.0	0.585820895522388	0.14430147058823528	97.29646455628165	49.67559544980377	6.834210160750193
1959	103.0	0.7862595419847328	0.29428571428571426	72.17766952966369	39.79084682032206	3.4529327252475905
1960	139.0	0.6043478260869565	0.10675883256528418	102.36753236814714	56.91960355623951	4.687484267205834
1961	173.0	0.5492063492063493	0.35450819672131145	123.45584412271572	66.85497030734126	6.208170624759955
1962	33.0	0.8461538461538461	0.6346153846153846	24.035533905932738	14.844135926062487	2.8952675921986675
1963	80.0	0.6201550387596899	0.31746031746031744	59.384776310850235	30.64146415824637	4.953349799772177
1964	332.0	0.3692992213570634	0.06772745818033456	218.00714267493643	113.73455944988582	10.401289033853605
1965	97.0	0.6510067114093959	0.47549019607843135	69.72792206135786	37.604833129260214	5.318630805227313
1966	62.0	0.7469879518072289	0.23308270676691728	46.90559159102154	25.06996791612374	3.7011595120223952
1967	48.0	0.9230769230769231	0.8	37.621320343559645	21.418203100730725	2.900578168852994
1968	55.0	0.8870967741935484	0.4365079365079365	34.384776310850235	16.916289463620306	4.201669527231584
1969	165.0	0.5221518987341772	0.1523545706371191	119.63351365237939	64.78068673506162	5.313758832411955
1970	139.0	0.5840336134453782	0.1404040404040404	105.07716446627535	62.182204739390826	5.267581129284441
1971	134.0	0.5677966101694916	0.2427536231884058	96.04163056034261	54.63297047723459	5.303062827271308
1972	101.0	0.6917808219178082	0.14145658263305322	76.42640687119285	43.3887457354043	3.3519816314703776
1973	110.0	0.7236842105263158	0.2558139534883721	80.5208152801713	49.22024067237725	3.018287082699511
1974	112.0	0.7777777777777778	0.4	73.7634559672906	39.28756187457723	3.916895937857
1975	141.0	0.5320754716981132	0.14461538461538462	97.1543289325507	51.69459215019274	6.235709362353868
1976	200.0	0.7352941176470589	0.16447368421052633	102.61017305526642	53.64468013813133	5.9544851060002095
1977	42.0	0.75	0.3111111111111111	32.14213562373095	19.104509625545912	3.2738955755387864
1978	77.0	0.7777777777777778	0.6209677419354839	55.86396103067893	35.073360450752666	3.3157424559414044
1979	276.0	0.6202247191011236	0.08011611030478955	172.59292911256333	93.62820529937119	5.264250518299081
1980	111.0	0.5692307692307692	0.3447204968944099	85.65685424949238	50.958313287256104	4.188627604854822
1981	196.0	0.6282051282051282	0.10675381263616558	135.6812408671319	71.87723185374324	4.451139807174568
1982	195.0	0.47560975609756095	0.09325681492109039	136.40916292848976	72.99924657510051	6.963969882347671
1983	110.0	0.7801418439716312	0.16666666666666666	80.29036790187178	41.92593362119329	3.5071437001416106
1984	119.0	0.46303501945525294	0.2916666666666667	92.55634918610404	59.909963155005805	5.830592279278065
1985	36.0	0.8571428571428571	0.36	27.17766952966369	14.360053694798102	3.3331434917861444
1986	139.0	0.5018050541516246	0.13137996219281664	103.7401153701776	58.06332086149264	6.252297491965171
1987	140.0	0.5882352941176471	0.12962962962962962	96.71067811865477	51.21083393082912	5.49076017439428
1988	130.0	0.7303370786516854	0.20634920634920634	92.76955262170046	48.50915972777453	3.727699294723837
1989	123.0	0.5801886792452831	0.3333333333333333	86.79898987322333	45.99156997743243	5.966839443649579
1990	114.0	0.6785714285714286	0.15966386554621848	81.74011537017762	43.54787484068816	4.624125355389611
1991	120.0	0.6779661016949152	0.15037593984962405	86.91168824543142	47.400292020826214	4.062988050185949
1992	91.0	0.7054263565891473	0.52	66.89949493661166	39.82731537918957	3.714369729761832
1993	173.0	0.6947791164658634	0.12013888888888889	110.88834764831844	59.207355095943626	5.255668417976659
1994	262.0	0.36137931034482756	0.07638483965014577	178.2731239591687	94.31393522431016	9.703000327760504
1995	44.0	0.7586206896551724	0.36666666666666664	31.520815280171306	18.594287630491433	3.405814873502358
1996	242.0	0.54627539503386	0.07908496732026143	164.69343417595167	89.55507526882009	5.639703784414973
1997	131.0	0.6298076923076923	0.12208760484622554	85.43250352560273	50.624941890024935	4.630555702596216
1998	99.0	0.6556291390728477	0.48292682926829267	75.6923881554251	45.70533650920661	3.9630051946057305
[truncated: 198,195 more rows]
