# Supplementary material for: Misic, a general deep learning-based method for the high-throughput cell segmentation of complex bacterial communities
Source: eLife journal article supplement (doi:10.7554/elife.65151), 2021-09-09
Supplement: supp1 [file elife-65151-supp1-v2.pdf]

**Table S1. Bacterial strains used in this study**

| Strain name                   | Strain/Genotype                                    | Origin                                       |
|-------------------------------|----------------------------------------------------|----------------------------------------------|
| <i>Myxococcus xanthus</i>     |                                                    |                                              |
| DZ2                           |                                                    | Laboratory collection                        |
| DM14                          | DZ2 <i>attmx8 ftsZ</i> -NG                         | This work                                    |
| DM31                          | DZ2 p3068-sfGFP                                    | This work                                    |
| <i>Escherichia coli</i>       |                                                    |                                              |
| MG1655                        |                                                    | Laboratory collection                        |
| EC500                         | TOP 10 pFPV-mCherry (pGG2-rpsM-mCherry)            | Laboratory collection                        |
| <i>Pseudomonas aeruginosa</i> | Wild type strain PAK                               | Laboratory collection                        |
| <i>Bacillus subtilis</i>      | Prototrophic wild-type strain, 168CA <i>trpC</i> + | Laboratory collection                        |
| <i>Bacillus subtilis</i>      | Wild type, Strain 168                              | Laboratory collection                        |
| <i>Caulobacter crescentus</i> | NA1000- <i>hfsA</i> +                              | Marks M.E et al. J. Bact. 2010 <sup>15</sup> |
| <i>Anabaena nostoc</i>        | PCC 7120                                           | Pasteur Institute cyanobacterial collection  |
| <i>Desulfovibrio vulgaris</i> | Wild type strain                                   | Laboratory collection                        |
