# Supplementary material for: Misic, a general deep learning-based method for the high-throughput cell segmentation of complex bacterial communities
Source: eLife journal article supplement (doi:10.7554/elife.65151), 2021-09-09
Supplement: supp2 [file elife-65151-supp2-v2.pdf]

**Table S2. Primers**

| Primer name | Sequence                                                          | Use                                                    | Construct |
|-------------|-------------------------------------------------------------------|--------------------------------------------------------|-----------|
| oDM1        | CTC-TAG-AAC-TAG-TGG-AT<br>C-CGA-ACA-ACC-GCC-GCG-<br>TGG-GG        | cloning of <i>ftsZ</i>                                 | pDM6      |
| oDM2        | GTA-TTT-CAC-ACC-GCA-TA<br>T-GTT-ACG-GCA-GTT-CCG-<br>TCT-GGC       | cloning of <i>ftsZ</i>                                 | pDM6      |
| oDM16       | cct-gca-ggt-cga-ctc-tag-atc-act<br>-tat-aga-gtt-cat-cc            | cloning of Neon-Green                                  | pDM6      |
| oDM17       | gac-gga-act-gcc-ggg-tac-cgg-t<br>ac-cgg-gcc-ccc-cct-c             | cloning of Neon-Green                                  | pDM6      |
| oDM53       | GTT-CTT-CAC-CTT-TAG-AC<br>A-TTG-ACA-CTC-CTC-AAA-A<br>AT-AAA-TGG-A | cloning of <i>MXAN_3068</i> upstream<br>region         | pDM14     |
| oDM54       | GGG-GAT-CCG-GGC-GAA-C<br>GG-GAA-TTC-TA                            | cloning of <i>MXAN_3068</i> upstream<br>region (p3038) | pDM14     |
| oDM61       | CCG-CAT-ATG-TTA-TTT-GT<br>A-GAG-CTC-ATC-C                         | cloning of sfGFP downstream of<br>p3068                | pDM14     |
| oDM62       | TTT-TGA-GGA-GTG-TCA-AT<br>G-TCT-AAA-GGT-GAA-GAA-<br>C             | cloning of sfGFP downstream of<br>p3068                | pDM14     |
