# Supplementary material for: Misic, a general deep learning-based method for the high-throughput cell segmentation of complex bacterial communities
Source: eLife journal article supplement (doi:10.7554/elife.65151), 2021-09-09
Supplement: supp3 [file elife-65151-supp3-v2.pdf]

**Table S3: Plasmids**

| Plasmid name | Backbone                               | Genotype                  |
|--------------|----------------------------------------|---------------------------|
| pDM6         | pKA32 (Treuner-Lange, Mol. Micro 2013) | Pnat-ftsZ-linkerNeonGreen |
| pDM14        | pSWU19                                 | pSWU19_p3068-sfGFP        |
